# Supplementary material for: Basic chemical composition combination rules and quantitative criterion of red beds
Source: Copernicus journal article supplement (doi:10.5194/se-15-1185-2024), 2024-09-20
Supplement: Supplementary file 1 [file se-15-1185-2024-supplement.zip]

## Sheet: Data
EarthChem Download: Friday, Apr. 20, 2018 9:14:59 am
Search Criteria:
Material	metamorphic
Rock Name	gneiss
SAMPLE ID	IGSN	SOURCE	DOI	TITLE	JOURNAL	AUTHOR	CRUISEID	LATITUDE	LONGITUDE	LOC PREC	MIN AGE	AGE	MAX AGE	METHOD	MATERIAL	TYPE	COMPOSITION	ROCK NAME	SIO2	TIO2	AL2O3	FE2O3	FE2O3T	FEO	FEOT	MGO	CAO	NA2O	K2O	P2O5	MNO	LOI	H2O_PLUS	H2O_MINUS	H2O	CR2O3	LA	NIO	CE	PR	ND	SM	EU	GD	TB	DY	HO	ER	TM
14		GEOROC	10.1130/0016-7606(1989)101<0333:NIATOO>2.3.CO;2	ND ISOTOPES AND THE ORIGIN OF 1.9-1.7 GA PENOKEAN CONTINENTAL CRUST OF THE LAKE SUPERIOR REGION	BULL. GEOL. SOC. AM.	BAROVICH, K. M.; PATCHETT, P. J.; PETERMAN, Z. E.; SIMS, P. K.		45	-88	0.01	1880	1880	1880	TIMS_ID	METAMORPHIC	UNKNOWN	UNKNOWN	GNEISS																							10.82	1.87
14		GEOROC	10.1130/0016-7606(1989)101<0333:NIATOO>2.3.CO;2	ND ISOTOPES AND THE ORIGIN OF 1.9-1.7 GA PENOKEAN CONTINENTAL CRUST OF THE LAKE SUPERIOR REGION	BULL. GEOL. SOC. AM.	BAROVICH, K. M.; PATCHETT, P. J.; PETERMAN, Z. E.; SIMS, P. K.		45	-88	0.01	1880	1880	1880	TIMS	METAMORPHIC	UNKNOWN	UNKNOWN	GNEISS
B-78-14A		GEOROC	10.1007/BF00279728	GEOCHRONOLOGIC AND SR-ISOTOPIC STUDIES OF CERTAIN UNITS IN THE BARBERTON GRANITE-GREENSTONE TERRANE, SOUTH AFRICA	SPEC. PUBL. GEOL. SOC. S. AFR.	BARTON, J. M. JR.; ROBB, L. J.; ANHAEUSSER, C. R.; VAN NIEROP, D. A.		-26.15	30.5	0.01	2500	3175	3850	NOT GIVEN	METAMORPHIC	UNKNOWN	UNKNOWN	GNEISS
108		GEOROC	10.1007/s00410-002-0396-z	PLUME DYNAMICS BENEATH THE AFRICAN PLATE INFERRED FROM THE GEOCHEMISTRY OF THE TERTIARY BASALTS OF SOUTHERN ETHIOPIA		SCHÜRMANN, H. M. E.		25	34	0.01				NOT GIVEN	METAMORPHIC	UNKNOWN	UNKNOWN	GNEISS	68.25	0.45	14.77	2.77		1.1		1.46	4.9	3.45	1.22	0.14					1.24
1450.7		GEOROC	10.1130/B25240.1	PETROLOGY AND GEOCHEMISTRY OF NEOPROTEROZOIC VOLCANIC ARC TERRANES BENEATH THE ATLANTIC COASTAL PLAIN, SAVANNAH RIVER SITE, SOUTH CAROLINA	BULL. GEOL. SOC. AM.	DENNIS, A. J.; SHERVAIS, J. W.; MAULDIN, J.; MAHER, H. D.; JR.; WRIGHT, J. E.		33.2	-81.5	0.01	542	1521	2500	XRF	METAMORPHIC	UNKNOWN	UNKNOWN	GNEISS	78.32	0.1	11.74		1.21			0.15	0.77	5.82	0.91	0.01	0.02
1450.7		GEOROC	10.1130/B25240.1	PETROLOGY AND GEOCHEMISTRY OF NEOPROTEROZOIC VOLCANIC ARC TERRANES BENEATH THE ATLANTIC COASTAL PLAIN, SAVANNAH RIVER SITE, SOUTH CAROLINA	BULL. GEOL. SOC. AM.	DENNIS, A. J.; SHERVAIS, J. W.; MAULDIN, J.; MAHER, H. D.; JR.; WRIGHT, J. E.		33.2	-81.5	0.01	542	1521	2500	IGN	METAMORPHIC	UNKNOWN	UNKNOWN	GNEISS														0.72
1450.7		GEOROC	10.1130/B25240.1	PETROLOGY AND GEOCHEMISTRY OF NEOPROTEROZOIC VOLCANIC ARC TERRANES BENEATH THE ATLANTIC COASTAL PLAIN, SAVANNAH RIVER SITE, SOUTH CAROLINA	BULL. GEOL. SOC. AM.	DENNIS, A. J.; SHERVAIS, J. W.; MAULDIN, J.; MAHER, H. D.; JR.; WRIGHT, J. E.		33.2	-81.5	0.01	542	1521	2500	ICPMS	METAMORPHIC	UNKNOWN	UNKNOWN	GNEISS																			30.3		70.4	8.2	30	7.4	0.34	6.8	1.34	7.2	1.62	4.2	0.66
1901H		GEOROC	10.1016/j.lithos.2015.05.017	LATE PRECAMBRIAN AGES FOR GRANITIC ROCKS INTRUDING THE HIDA MOUNTAINS	BULL. GEOL. SURV. JAPAN	SHIBATA, K.; NOZAWA, T.		36.4356	137.221	0.01				MS	METAMORPHIC	UNKNOWN	UNKNOWN	GNEISS
1901H		GEOROC	10.1016/j.lithos.2015.05.017	LATE PRECAMBRIAN AGES FOR GRANITIC ROCKS INTRUDING THE HIDA MOUNTAINS	BULL. GEOL. SURV. JAPAN	SHIBATA, K.; NOZAWA, T.		36.4356	137.221	0.01				MS_ID	METAMORPHIC	UNKNOWN	UNKNOWN	GNEISS
1901H		GEOROC	10.1016/j.lithos.2015.05.017	LATE PRECAMBRIAN AGES FOR GRANITIC ROCKS INTRUDING THE HIDA MOUNTAINS	BULL. GEOL. SURV. JAPAN	SHIBATA, K.; NOZAWA, T.		36.4356	137.221	0.01				MS	METAMORPHIC	UNKNOWN	UNKNOWN	GNEISS
YT-005		GEOROC	10.1016/0012-821X(81)90181-3	ND AND SR ISOTOPIC STUDY OF VOLCANIC ROCKS FROM JAPAN	EARTH PLANET. SCI. LETT.	NOHDA, S.; WASSERBURG, G. J.		32.53	130.58	0.01	416	430	444	TIMS_ID	METAMORPHIC	UNKNOWN	UNKNOWN	GNEISS																							21.6	4.4
YT-005		GEOROC	10.1016/0012-821X(81)90181-3	ND AND SR ISOTOPIC STUDY OF VOLCANIC ROCKS FROM JAPAN	EARTH PLANET. SCI. LETT.	NOHDA, S.; WASSERBURG, G. J.		32.53	130.58	0.01	416	430	444	TIMS	METAMORPHIC	UNKNOWN	UNKNOWN	GNEISS
B-79-14G		GEOROC	10.1007/BF00306664	GEOCHRONOLOGIC AND SR-ISOTOPIC STUDIES OF CERTAIN UNITS IN THE BARBERTON GRANITE-GREENSTONE TERRANE, SOUTH AFRICA	SPEC. PUBL. GEOL. SOC. S. AFR.	BARTON, J. M. JR.; ROBB, L. J.; ANHAEUSSER, C. R.; VAN NIEROP, D. A.		-26.1	31	0.01	2500	3175	3850	NOT GIVEN	METAMORPHIC	UNKNOWN	UNKNOWN	GNEISS
S-89-34		GEOROC	10.1016/0301-9268(94)90102-3	GEOCHEMICAL EVOLUTION OF THE MINTO BLOCK: A 2.7 GA CONTINENTAL MAGMATIC ARC BUILT ON THE SUPERIOR PROTO-CRATON	PREC. RESEARCH	STERN, R. A.; PERCIVAL, J. A.; MORTENSEN, J. K.		57.8601	-75.0619	0.01	2500	3175	3850	XRF	METAMORPHIC	UNKNOWN	UNKNOWN	GNEISS	64.81	0.61	16		6.99			2.44	2.92	3.54	2.48	0.09	0.12
S-89-34		GEOROC	10.1016/0301-9268(94)90102-3	GEOCHEMICAL EVOLUTION OF THE MINTO BLOCK: A 2.7 GA CONTINENTAL MAGMATIC ARC BUILT ON THE SUPERIOR PROTO-CRATON	PREC. RESEARCH	STERN, R. A.; PERCIVAL, J. A.; MORTENSEN, J. K.		57.8601	-75.0619	0.01	2500	3175	3850	TIMS_ID	METAMORPHIC	UNKNOWN	UNKNOWN	GNEISS																							17.454	3.369
S-89-34		GEOROC	10.1016/0301-9268(94)90102-3	GEOCHEMICAL EVOLUTION OF THE MINTO BLOCK: A 2.7 GA CONTINENTAL MAGMATIC ARC BUILT ON THE SUPERIOR PROTO-CRATON	PREC. RESEARCH	STERN, R. A.; PERCIVAL, J. A.; MORTENSEN, J. K.		57.8601	-75.0619	0.01	2500	3175	3850	TIMS	METAMORPHIC	UNKNOWN	UNKNOWN	GNEISS
S-89-34		GEOROC	10.1016/0301-9268(94)90102-3	GEOCHEMICAL EVOLUTION OF THE MINTO BLOCK: A 2.7 GA CONTINENTAL MAGMATIC ARC BUILT ON THE SUPERIOR PROTO-CRATON	PREC. RESEARCH	STERN, R. A.; PERCIVAL, J. A.; MORTENSEN, J. K.		57.8601	-75.0619	0.01	2500	3175	3850	MS_ID	METAMORPHIC	UNKNOWN	UNKNOWN	GNEISS																			21.4		41.7		17.3	3.36	0.87	3.07		2.82		1.72
S-89-34		GEOROC	10.1016/0301-9268(94)90102-3	GEOCHEMICAL EVOLUTION OF THE MINTO BLOCK: A 2.7 GA CONTINENTAL MAGMATIC ARC BUILT ON THE SUPERIOR PROTO-CRATON	PREC. RESEARCH	STERN, R. A.; PERCIVAL, J. A.; MORTENSEN, J. K.		57.8601	-75.0619	0.01	2500	3175	3850	ICPAES	METAMORPHIC	UNKNOWN	UNKNOWN	GNEISS
B-77-38E		GEOROC	10.1134/S1075701506040027	GEOCHRONOLOGIC AND SR-ISOTOPIC STUDIES OF CERTAIN UNITS IN THE BARBERTON GRANITE-GREENSTONE TERRANE, SOUTH AFRICA	SPEC. PUBL. GEOL. SOC. S. AFR.	BARTON, J. M. JR.; ROBB, L. J.; ANHAEUSSER, C. R.; VAN NIEROP, D. A.		-26	31	0.01	2500	3175	3850	NOT GIVEN	METAMORPHIC	UNKNOWN	UNKNOWN	GNEISS
XAYA-34		GEOROC	10.1016/j.tecto.2008.01.010	ORDOVICIAN-EARLIEST SILURIAN RIFT THOLEIITES IN THE ACATLÁN COMPLEX, SOUTHERN MEXICO: EVIDENCE OF RIFTING ON THE SOUTHERN MARGIN OF THE RHEIC OCEAN	TECTONOPHYSICS	KEPPIE, J. D.; DOSTAL, J.; MILLER, B. V.; RAMOS-ARIAS, M. A.; MORALES-GAMEZ, M.; NANCE, R. D.; MURPHY, J. B.; ORTEGA-RIVERA, A.; LEE, J. W. K.; COOPER, P.		18.25	-98	0.01	251	396.5	542	XRF	METAMORPHIC	UNKNOWN	UNKNOWN	GNEISS	46.96	0.6	14.18		9.23			12.15	9.68	0.6	2.59	0.09	0.15
XAYA-34		GEOROC	10.1016/j.tecto.2008.01.010	ORDOVICIAN-EARLIEST SILURIAN RIFT THOLEIITES IN THE ACATLÁN COMPLEX, SOUTHERN MEXICO: EVIDENCE OF RIFTING ON THE SOUTHERN MARGIN OF THE RHEIC OCEAN	TECTONOPHYSICS	KEPPIE, J. D.; DOSTAL, J.; MILLER, B. V.; RAMOS-ARIAS, M. A.; MORALES-GAMEZ, M.; NANCE, R. D.; MURPHY, J. B.; ORTEGA-RIVERA, A.; LEE, J. W. K.; COOPER, P.		18.25	-98	0.01	251	396.5	542	IGN	METAMORPHIC	UNKNOWN	UNKNOWN	GNEISS														2.72
XAYA-34		GEOROC	10.1016/j.tecto.2008.01.010	ORDOVICIAN-EARLIEST SILURIAN RIFT THOLEIITES IN THE ACATLÁN COMPLEX, SOUTHERN MEXICO: EVIDENCE OF RIFTING ON THE SOUTHERN MARGIN OF THE RHEIC OCEAN	TECTONOPHYSICS	KEPPIE, J. D.; DOSTAL, J.; MILLER, B. V.; RAMOS-ARIAS, M. A.; MORALES-GAMEZ, M.; NANCE, R. D.; MURPHY, J. B.; ORTEGA-RIVERA, A.; LEE, J. W. K.; COOPER, P.		18.25	-98	0.01	251	396.5	542	ICPMS	METAMORPHIC	UNKNOWN	UNKNOWN	GNEISS																			15.4		33.4	4.39	18.9	3.98	0.97	3.53	0.524	3.06	0.617	1.79	0.252
BH72		GEOROC	10.1144/GSL.SP.1987.033.01.27	THE GEOCHEMISTRY OF THE LOWER PROTEROZOIC WILLYAMA COMPLEX VOLCANICS, BROKEN HILL BLOCK, NEW SOUTH WALES	SPEC. PUBL. GEOL. SOC. LONDON	JAMES, S. D.; PEARCE, J. A.; OLIVER, R. A.		-31.5	141	0.01				XRF	METAMORPHIC	UNKNOWN	UNKNOWN	GNEISS	61.5	1.68	13.82		10.88			2.2	6.36	2.54	0.44	0.18	0.22
BH72		GEOROC	10.1144/GSL.SP.1987.033.01.27	THE GEOCHEMISTRY OF THE LOWER PROTEROZOIC WILLYAMA COMPLEX VOLCANICS, BROKEN HILL BLOCK, NEW SOUTH WALES	SPEC. PUBL. GEOL. SOC. LONDON	JAMES, S. D.; PEARCE, J. A.; OLIVER, R. A.		-31.5	141	0.01				INAA	METAMORPHIC	UNKNOWN	UNKNOWN	GNEISS																			28.67		59.53		34.1	7.46			1.26
BH72		GEOROC	10.1144/GSL.SP.1987.033.01.27	THE GEOCHEMISTRY OF THE LOWER PROTEROZOIC WILLYAMA COMPLEX VOLCANICS, BROKEN HILL BLOCK, NEW SOUTH WALES	SPEC. PUBL. GEOL. SOC. LONDON	JAMES, S. D.; PEARCE, J. A.; OLIVER, R. A.		-31.5	141	0.01				AAS	METAMORPHIC	UNKNOWN	UNKNOWN	GNEISS
B-78-15I		GEOROC	10.1007/BF02597705	GEOCHRONOLOGIC AND SR-ISOTOPIC STUDIES OF CERTAIN UNITS IN THE BARBERTON GRANITE-GREENSTONE TERRANE, SOUTH AFRICA	SPEC. PUBL. GEOL. SOC. S. AFR.	BARTON, J. M. JR.; ROBB, L. J.; ANHAEUSSER, C. R.; VAN NIEROP, D. A.		-26.15	30.5	0.01	2500	3175	3850	NOT GIVEN	METAMORPHIC	UNKNOWN	UNKNOWN	GNEISS
B-78-9H		GEOROC	10.1016/S0016-7037(96)00369-9	GEOCHRONOLOGIC AND SR-ISOTOPIC STUDIES OF CERTAIN UNITS IN THE BARBERTON GRANITE-GREENSTONE TERRANE, SOUTH AFRICA	SPEC. PUBL. GEOL. SOC. S. AFR.	BARTON, J. M. JR.; ROBB, L. J.; ANHAEUSSER, C. R.; VAN NIEROP, D. A.		-26.05	31	0.01	2500	3175	3850	NOT GIVEN	METAMORPHIC	UNKNOWN	UNKNOWN	GNEISS
Z87HO		GEOROC	10.1007/BF00381291	HIGH D18O AND POSSIBLE PRE-ERUPTIONAL RB-SR ISOCHRONS IN CORDIERITE-BEARING NEOGENE VOLCANICS FROM SE SPAIN	CONTRIB. MINERAL. PETROL.	MUNKSGAARD, N. C.		37	-2.4	0.01	2.6	12.8	23	XRF	METAMORPHIC	UNKNOWN	UNKNOWN	GNEISS	48.7										2.46
Z87HO		GEOROC	10.1007/BF00381291	HIGH D18O AND POSSIBLE PRE-ERUPTIONAL RB-SR ISOCHRONS IN CORDIERITE-BEARING NEOGENE VOLCANICS FROM SE SPAIN	CONTRIB. MINERAL. PETROL.	MUNKSGAARD, N. C.		37	-2.4	0.01	2.6	12.8	23	TIMS	METAMORPHIC	UNKNOWN	UNKNOWN	GNEISS
PC-434		GEOROC	10.1093/petrology/egr014	IMPLICATIONS OF THE NUVVUAGITTUQ GREENSTONE BELT FOR THE FORMATION OF EARTHS EARLY CRUST	J. PETROL.	O^NEIL, J.; FRANCIS, D. M.; CARLSON, R. W.		58	-77	0.01				XRF	METAMORPHIC	UNKNOWN	UNKNOWN	GNEISS	51.02	0.372	16.94				9.31303	9.37	9.94	1.39	0.31	0.04	0.205
PC-434		GEOROC	10.1093/petrology/egr014	IMPLICATIONS OF THE NUVVUAGITTUQ GREENSTONE BELT FOR THE FORMATION OF EARTHS EARLY CRUST	J. PETROL.	O^NEIL, J.; FRANCIS, D. M.; CARLSON, R. W.		58	-77	0.01				IGN	METAMORPHIC	UNKNOWN	UNKNOWN	GNEISS														0.79
B-79-13H		GEOROC	10.1016/j.jvolgeores.2016.07.003	GEOCHRONOLOGIC AND SR-ISOTOPIC STUDIES OF CERTAIN UNITS IN THE BARBERTON GRANITE-GREENSTONE TERRANE, SOUTH AFRICA	SPEC. PUBL. GEOL. SOC. S. AFR.	BARTON, J. M. JR.; ROBB, L. J.; ANHAEUSSER, C. R.; VAN NIEROP, D. A.		-26.1	31	0.01	2500	3175	3850	NOT GIVEN	METAMORPHIC	UNKNOWN	UNKNOWN	GNEISS
629		GEOROC	10.1130/0016-7606(1977)88<241:RGOTCB>2.0.CO;2	RECONNAISSANCE GEOCHRONOLOGY OF THE CRYSTALLINE BASEMENT ROCKS OF THE COASTAL CORDILLERA OF SOUTHERN PERU	BULL. GEOL. SOC. AM.	COBBING, E. J.; OZARD, J. M.; SNELLING, N. J.		-16	-72	0.01				XRF	METAMORPHIC	UNKNOWN	UNKNOWN	GNEISS
629		GEOROC	10.1130/0016-7606(1977)88<241:RGOTCB>2.0.CO;2	RECONNAISSANCE GEOCHRONOLOGY OF THE CRYSTALLINE BASEMENT ROCKS OF THE COASTAL CORDILLERA OF SOUTHERN PERU	BULL. GEOL. SOC. AM.	COBBING, E. J.; OZARD, J. M.; SNELLING, N. J.		-16	-72	0.01				TIMS	METAMORPHIC	UNKNOWN	UNKNOWN	GNEISS
GNB-10		GEOROC	10.1017/S0016756807003858	ZIRCON AGES OF THE METAVOLCANIC ROCKS AND METAGRANITES OF THE OLLO DE SAPO DOMAIN IN CENTRAL SPAIN: IMPLICATIONS FOR THE NEOPROTEROZOIC TO EARLY PALEOZOIC EVOLUTION OF IBERIA	GEOL. MAG.	MONTERO, P.; BEA, F.; GONZALES-LODEIRO, F.; TALAVERA, C.; WHITEHOUSE, M. J.		41.53	-6.12	0.01	4830	4830	4830	XRF	METAMORPHIC	UNKNOWN	UNKNOWN	GNEISS	65.54	0.67	15.79				4.25	2.62	2.88	3.1	3.36	0.35	0.06
GNB-10		GEOROC	10.1017/S0016756807003858	ZIRCON AGES OF THE METAVOLCANIC ROCKS AND METAGRANITES OF THE OLLO DE SAPO DOMAIN IN CENTRAL SPAIN: IMPLICATIONS FOR THE NEOPROTEROZOIC TO EARLY PALEOZOIC EVOLUTION OF IBERIA	GEOL. MAG.	MONTERO, P.; BEA, F.; GONZALES-LODEIRO, F.; TALAVERA, C.; WHITEHOUSE, M. J.		41.53	-6.12	0.01	4830	4830	4830	TIMS	METAMORPHIC	UNKNOWN	UNKNOWN	GNEISS
GNB-10		GEOROC	10.1017/S0016756807003858	ZIRCON AGES OF THE METAVOLCANIC ROCKS AND METAGRANITES OF THE OLLO DE SAPO DOMAIN IN CENTRAL SPAIN: IMPLICATIONS FOR THE NEOPROTEROZOIC TO EARLY PALEOZOIC EVOLUTION OF IBERIA	GEOL. MAG.	MONTERO, P.; BEA, F.; GONZALES-LODEIRO, F.; TALAVERA, C.; WHITEHOUSE, M. J.		41.53	-6.12	0.01	4830	4830	4830	IGN	METAMORPHIC	UNKNOWN	UNKNOWN	GNEISS														0.97
GNB-10		GEOROC	10.1017/S0016756807003858	ZIRCON AGES OF THE METAVOLCANIC ROCKS AND METAGRANITES OF THE OLLO DE SAPO DOMAIN IN CENTRAL SPAIN: IMPLICATIONS FOR THE NEOPROTEROZOIC TO EARLY PALEOZOIC EVOLUTION OF IBERIA	GEOL. MAG.	MONTERO, P.; BEA, F.; GONZALES-LODEIRO, F.; TALAVERA, C.; WHITEHOUSE, M. J.		41.53	-6.12	0.01	4830	4830	4830	ICPMS	METAMORPHIC	UNKNOWN	UNKNOWN	GNEISS																			82.9		161	18.4	66.1	10.3	1.5	6.44	0.87	4.09	0.75	1.88	0.27
G92-15		GEOROC	10.2113/gsecongeo.90.5.1217	RARE EARTH ELEMENT GEOCHEMISTRY OF THE METAMORPHOSED VOLCANOGENIC MASSIVE SULFIDE DEPOSITS OF THE MANITOUWADGE MINING CAMP, SUPERIOR PROVINCE, CANADA: A POTENTIAL EXPLORATION TOOL?	ECON. GEOL.	SCHANDL, E. S.; GORTON, M. P.; WASTENEYS, H A.		49.2	-85.83	0.01	2500	3175	3850	INAA	METAMORPHIC	UNKNOWN	UNKNOWN	GNEISS					5.79					2.44									43.67		97.15		45.87	8.38	1.95		0.76
13JN22-5		GEOROC	10.1016/j.precamres.2016.09.025	NEOARCHEAN ANDEAN-TYPE ACTIVE CONTINENTAL MARGIN IN THE NORTHEASTERN NORTH CHINA CRATON: GEOCHEMICAL AND GEOCHRONOLOGICAL EVIDENCE FROM METAVOLCANIC ROCKS IN THE JIAPIGOU GRANITE-GREENSTONE BELT, SOUTHERN JILIN PROVINCE	PREC. RESEARCH	GUO, BORAN; LIU, SHUWEN; ZHANG, JIAN; WANG, WEI; FU, JINGHAO; WANG, MAOJIANG		42.9047	127.312	0.01	2500	3175	3850	XRF	METAMORPHIC	UNKNOWN	UNKNOWN	GNEISS	59.61	0.67	15.5		8.13			4.35	5.21	3.45	2.03	0.23	0.11
13JN22-5		GEOROC	10.1016/j.precamres.2016.09.025	NEOARCHEAN ANDEAN-TYPE ACTIVE CONTINENTAL MARGIN IN THE NORTHEASTERN NORTH CHINA CRATON: GEOCHEMICAL AND GEOCHRONOLOGICAL EVIDENCE FROM METAVOLCANIC ROCKS IN THE JIAPIGOU GRANITE-GREENSTONE BELT, SOUTHERN JILIN PROVINCE	PREC. RESEARCH	GUO, BORAN; LIU, SHUWEN; ZHANG, JIAN; WANG, WEI; FU, JINGHAO; WANG, MAOJIANG		42.9047	127.312	0.01	2500	3175	3850	MC_ICPMS	METAMORPHIC	UNKNOWN	UNKNOWN	GNEISS																			17.8		34	4.11	17.3	3.71	1.25	3.95	0.57	3.38	0.62	1.83	0.23
13JN22-5		GEOROC	10.1016/j.precamres.2016.09.025	NEOARCHEAN ANDEAN-TYPE ACTIVE CONTINENTAL MARGIN IN THE NORTHEASTERN NORTH CHINA CRATON: GEOCHEMICAL AND GEOCHRONOLOGICAL EVIDENCE FROM METAVOLCANIC ROCKS IN THE JIAPIGOU GRANITE-GREENSTONE BELT, SOUTHERN JILIN PROVINCE	PREC. RESEARCH	GUO, BORAN; LIU, SHUWEN; ZHANG, JIAN; WANG, WEI; FU, JINGHAO; WANG, MAOJIANG		42.9047	127.312	0.01	2500	3175	3850	IGN	METAMORPHIC	UNKNOWN	UNKNOWN	GNEISS														0.53
B-78-15A		GEOROC	10.1029/2004GC000895	GEOCHRONOLOGIC AND SR-ISOTOPIC STUDIES OF CERTAIN UNITS IN THE BARBERTON GRANITE-GREENSTONE TERRANE, SOUTH AFRICA	SPEC. PUBL. GEOL. SOC. S. AFR.	BARTON, J. M. JR.; ROBB, L. J.; ANHAEUSSER, C. R.; VAN NIEROP, D. A.		-26.15	30.5	0.01	2500	3175	3850	NOT GIVEN	METAMORPHIC	UNKNOWN	UNKNOWN	GNEISS
G93-16		GEOROC	10.2113/gsecongeo.90.5.1217	RARE EARTH ELEMENT GEOCHEMISTRY OF THE METAMORPHOSED VOLCANOGENIC MASSIVE SULFIDE DEPOSITS OF THE MANITOUWADGE MINING CAMP, SUPERIOR PROVINCE, CANADA: A POTENTIAL EXPLORATION TOOL?	ECON. GEOL.	SCHANDL, E. S.; GORTON, M. P.; WASTENEYS, H A.		49.2	-85.83	0.01	2500	3175	3850	INAA	METAMORPHIC	UNKNOWN	UNKNOWN	GNEISS					2.7					4.87									59.47		153.79		49.58	7.54	2.01		0.49
PC-441		GEOROC	10.1093/petrology/egr014	IMPLICATIONS OF THE NUVVUAGITTUQ GREENSTONE BELT FOR THE FORMATION OF EARTHS EARLY CRUST	J. PETROL.	O^NEIL, J.; FRANCIS, D. M.; CARLSON, R. W.		58	-77	0.01				XRF	METAMORPHIC	UNKNOWN	UNKNOWN	GNEISS	49.11	0.554	15.86				11.1756	13.25	0.64	0.07	2.56	0.066	0.266
PC-441		GEOROC	10.1093/petrology/egr014	IMPLICATIONS OF THE NUVVUAGITTUQ GREENSTONE BELT FOR THE FORMATION OF EARTHS EARLY CRUST	J. PETROL.	O^NEIL, J.; FRANCIS, D. M.; CARLSON, R. W.		58	-77	0.01				IGN	METAMORPHIC	UNKNOWN	UNKNOWN	GNEISS														5.64
6/10		GEOROC	10.1093/petroj/40.10.1527	CRUSTAL RECYCLING OF METAMORPHIC BASEMENT: LATE PALEOZOIC GRANITOIDS OF NORTHERN CHILE (ABOUT 22°S). IMPLICATIONS FOR THE COMPOSITION OF THE ANDEAN CRUST	J. PETROL.	LUCASSEN, F.; FRANZ, G.; THIRLWALL, M. F.; MEZGER, K.		-25.67	-67.08	0.01				XRF	METAMORPHIC	UNKNOWN	UNKNOWN	GNEISS
6/10		GEOROC	10.1093/petroj/40.10.1527	CRUSTAL RECYCLING OF METAMORPHIC BASEMENT: LATE PALEOZOIC GRANITOIDS OF NORTHERN CHILE (ABOUT 22°S). IMPLICATIONS FOR THE COMPOSITION OF THE ANDEAN CRUST	J. PETROL.	LUCASSEN, F.; FRANZ, G.; THIRLWALL, M. F.; MEZGER, K.		-25.67	-67.08	0.01				MS_ID	METAMORPHIC	UNKNOWN	UNKNOWN	GNEISS																							40.05	7.44
LP2		GEOROC	10.1016/j.epsl.2009.08.018	THE GEOLOGY AND GEOCHEMISTRY OF THE ARCHEAN GRANITES AND GNEISSES OF THE JOHANNESBURG-PRETORIA DOME	SPEC. PUBL. GEOL. SOC. S. AFR.	ANHAEUSSER, C. R.		-26.1	27.85	0.01				XRF	METAMORPHIC	UNKNOWN	UNKNOWN	GNEISS											1.61
LP2		GEOROC	10.1016/j.epsl.2009.08.018	THE GEOLOGY AND GEOCHEMISTRY OF THE ARCHEAN GRANITES AND GNEISSES OF THE JOHANNESBURG-PRETORIA DOME	SPEC. PUBL. GEOL. SOC. S. AFR.	ANHAEUSSER, C. R.		-26.1	27.85	0.01				NOT GIVEN	METAMORPHIC	UNKNOWN	UNKNOWN	GNEISS	67.46	0.38	16.81	0.52		2.23		1.17	3.3	5.01		0.09	0.06		1.09	0.05
1112B		GEOROC	10.2343/geochemj.8.193	RB-SR GEOCHRONOLOGY OF THE HIKAMI GRANITE, KITAKAMI MOUNTAINS, JAPAN	GEOCHEM. J.	SHIBATA, K.		39.0453	141.652	0.01	33	33	33	TIMS_ID	METAMORPHIC	UNKNOWN	UNKNOWN	GNEISS
1112B		GEOROC	10.2343/geochemj.8.193	RB-SR GEOCHRONOLOGY OF THE HIKAMI GRANITE, KITAKAMI MOUNTAINS, JAPAN	GEOCHEM. J.	SHIBATA, K.		39.0453	141.652	0.01	33	33	33	MS_ID	METAMORPHIC	UNKNOWN	UNKNOWN	GNEISS
N15		GEOROC	10.1093/petrology/egi072	ARCHAEAN CRUSTAL EVOLUTION OF THE CENTRAL KAAPVAAL CRATON, SOUTH AFRICA; EVIDENCE FROM THE JOHANNESBURG DOME	UNIV. WITWATERSRAND ECON. GEOL. RES. INF. CIRC.	ANHAEUSSER, C. R.		-26.13	25.63	0.01	2500	3175	3850	XRF	METAMORPHIC	UNKNOWN	UNKNOWN	GNEISS	74.41	0.21	13.81	0.21		1.04		0.25	2.47	6.62	0.41	0.04	0.01
N15		GEOROC	10.1093/petrology/egi072	ARCHAEAN CRUSTAL EVOLUTION OF THE CENTRAL KAAPVAAL CRATON, SOUTH AFRICA; EVIDENCE FROM THE JOHANNESBURG DOME	UNIV. WITWATERSRAND ECON. GEOL. RES. INF. CIRC.	ANHAEUSSER, C. R.		-26.13	25.63	0.01	2500	3175	3850	IGN	METAMORPHIC	UNKNOWN	UNKNOWN	GNEISS														0.49
N15		GEOROC	10.1093/petrology/egi072	ARCHAEAN CRUSTAL EVOLUTION OF THE CENTRAL KAAPVAAL CRATON, SOUTH AFRICA; EVIDENCE FROM THE JOHANNESBURG DOME	UNIV. WITWATERSRAND ECON. GEOL. RES. INF. CIRC.	ANHAEUSSER, C. R.		-26.13	25.63	0.01	2500	3175	3850	ICPMS	METAMORPHIC	UNKNOWN	UNKNOWN	GNEISS																			17.4		30.2	3.23	10.9	1.87	0.53	1.38	0.21	1.16	0.23	0.65	0.1
N15		GEOROC	10.1093/petrology/egi072	ARCHEAN CRUSTAL EVOLUTION OF THE CENTRAL KAAPVAAL CRATON, SOUTH AFRICA: EVIDENCE FROM THE JOHANNESBURG DOME	S. AFR. J. GEOL.	ANHAEUSSER, C. R.		-26.13	25.63	0.01	2500	3175	3850	XRF	METAMORPHIC	UNKNOWN	UNKNOWN	GNEISS	74.41	0.21	13.81	0.21		1.04		0.25	2.47	6.62	0.41	0.04	0.01
N15		GEOROC	10.1093/petrology/egi072	ARCHEAN CRUSTAL EVOLUTION OF THE CENTRAL KAAPVAAL CRATON, SOUTH AFRICA: EVIDENCE FROM THE JOHANNESBURG DOME	S. AFR. J. GEOL.	ANHAEUSSER, C. R.		-26.13	25.63	0.01	2500	3175	3850	IGN	METAMORPHIC	UNKNOWN	UNKNOWN	GNEISS														0.49
N15		GEOROC	10.1093/petrology/egi072	ARCHEAN CRUSTAL EVOLUTION OF THE CENTRAL KAAPVAAL CRATON, SOUTH AFRICA: EVIDENCE FROM THE JOHANNESBURG DOME	S. AFR. J. GEOL.	ANHAEUSSER, C. R.		-26.13	25.63	0.01	2500	3175	3850	ICPMS	METAMORPHIC	UNKNOWN	UNKNOWN	GNEISS																			17.4		30.2	3.23	10.9	1.87	0.53	1.38	0.21	1.16	0.21	0.65	0.1
00KYT-27		GEOROC	10.1016/j.precamres.2003.12.017	BASEMENT TERRANE CORRELATIONS AND CRUSTAL RECYCLING IN THE WESTERN SUPERIOR PROVINCE: ND ISOTOPIC CHARACTER OF GRANITOID AND FELSIC VOLCANIC ROCKS IN THE WABIGOON SUBPROVINCE, N. ONTARIO, CANADA	PREC. RESEARCH	TOMLINSON, K. Y.; STOTT, G. M.; PERCIVAL, J. A.; STONE, D.		49.4	-91.7	0.01	2500	3175	3850	TIMS_ID	METAMORPHIC	UNKNOWN	UNKNOWN	GNEISS																							13.59	1.39
00KYT-27		GEOROC	10.1016/j.precamres.2003.12.017	BASEMENT TERRANE CORRELATIONS AND CRUSTAL RECYCLING IN THE WESTERN SUPERIOR PROVINCE: ND ISOTOPIC CHARACTER OF GRANITOID AND FELSIC VOLCANIC ROCKS IN THE WABIGOON SUBPROVINCE, N. ONTARIO, CANADA	PREC. RESEARCH	TOMLINSON, K. Y.; STOTT, G. M.; PERCIVAL, J. A.; STONE, D.		49.4	-91.7	0.01	2500	3175	3850	TIMS	METAMORPHIC	UNKNOWN	UNKNOWN	GNEISS
CT-11		GEOROC	10.1017/S0016756807003858	ZIRCON AGES OF THE METAVOLCANIC ROCKS AND METAGRANITES OF THE OLLO DE SAPO DOMAIN IN CENTRAL SPAIN: IMPLICATIONS FOR THE NEOPROTEROZOIC TO EARLY PALEOZOIC EVOLUTION OF IBERIA	GEOL. MAG.	MONTERO, P.; BEA, F.; GONZALES-LODEIRO, F.; TALAVERA, C.; WHITEHOUSE, M. J.		41.08	-6	0.01	4750	4750	4750	XRF	METAMORPHIC	UNKNOWN	UNKNOWN	GNEISS	72.37	0.35	13.92				2.36	0.77	1.08	3.14	4.28	0.17	0.03
CT-11		GEOROC	10.1017/S0016756807003858	ZIRCON AGES OF THE METAVOLCANIC ROCKS AND METAGRANITES OF THE OLLO DE SAPO DOMAIN IN CENTRAL SPAIN: IMPLICATIONS FOR THE NEOPROTEROZOIC TO EARLY PALEOZOIC EVOLUTION OF IBERIA	GEOL. MAG.	MONTERO, P.; BEA, F.; GONZALES-LODEIRO, F.; TALAVERA, C.; WHITEHOUSE, M. J.		41.08	-6	0.01	4750	4750	4750	TIMS	METAMORPHIC	UNKNOWN	UNKNOWN	GNEISS
CT-11		GEOROC	10.1017/S0016756807003858	ZIRCON AGES OF THE METAVOLCANIC ROCKS AND METAGRANITES OF THE OLLO DE SAPO DOMAIN IN CENTRAL SPAIN: IMPLICATIONS FOR THE NEOPROTEROZOIC TO EARLY PALEOZOIC EVOLUTION OF IBERIA	GEOL. MAG.	MONTERO, P.; BEA, F.; GONZALES-LODEIRO, F.; TALAVERA, C.; WHITEHOUSE, M. J.		41.08	-6	0.01	4750	4750	4750	IGN	METAMORPHIC	UNKNOWN	UNKNOWN	GNEISS														0.85
CT-11		GEOROC	10.1017/S0016756807003858	ZIRCON AGES OF THE METAVOLCANIC ROCKS AND METAGRANITES OF THE OLLO DE SAPO DOMAIN IN CENTRAL SPAIN: IMPLICATIONS FOR THE NEOPROTEROZOIC TO EARLY PALEOZOIC EVOLUTION OF IBERIA	GEOL. MAG.	MONTERO, P.; BEA, F.; GONZALES-LODEIRO, F.; TALAVERA, C.; WHITEHOUSE, M. J.		41.08	-6	0.01	4750	4750	4750	ICPMS	METAMORPHIC	UNKNOWN	UNKNOWN	GNEISS																			22.2		46.7	5.79	21.9	4.92	0.89	4.34	0.67	3.68	0.64	1.5	0.19
RK2		GEOROC	10.1007/s004450050207	THE GEOLOGY AND GEOCHEMISTRY OF THE ARCHEAN GRANITES AND GNEISSES OF THE JOHANNESBURG-PRETORIA DOME	SPEC. PUBL. GEOL. SOC. S. AFR.	ANHAEUSSER, C. R.		-26.1	27.85	0.01				XRF	METAMORPHIC	UNKNOWN	UNKNOWN	GNEISS											1.39
RK2		GEOROC	10.1007/s004450050207	THE GEOLOGY AND GEOCHEMISTRY OF THE ARCHEAN GRANITES AND GNEISSES OF THE JOHANNESBURG-PRETORIA DOME	SPEC. PUBL. GEOL. SOC. S. AFR.	ANHAEUSSER, C. R.		-26.1	27.85	0.01				NOT GIVEN	METAMORPHIC	UNKNOWN	UNKNOWN	GNEISS	66.38	0.4	16.03	1.17		2.3		1.89	4.3	4.54		0.09	0.07		1.01	0.08
VDA 9906		GEOROC	10.1016/S0301-9268(03)00084-6	DERIVATION OF THE 1.0-0.9 GA FERRO-POTASSIC A-TYPE GRANITOIDS OF SOUTHERN NORWAY BY EXTREME DIFFERENTIATION FROM BASIC MAGMAS	PREC. RESEARCH	VANDER AUWERA, J.; BOGAERTS, M.; LIEGEOIS, J.-P.; DEMAIFFE, D.; WILMART, E.; BOLLE, OL; DUCHESNE, J.-C.		58	7	0.01	542	1521	2500	XRF/TIT	METAMORPHIC	UNKNOWN	UNKNOWN	GNEISS	73.56	0.42	13.23	3.23				1.02	2.7	4.26	0.86	0.09	0.04
VDA 9906		GEOROC	10.1016/S0301-9268(03)00084-6	DERIVATION OF THE 1.0-0.9 GA FERRO-POTASSIC A-TYPE GRANITOIDS OF SOUTHERN NORWAY BY EXTREME DIFFERENTIATION FROM BASIC MAGMAS	PREC. RESEARCH	VANDER AUWERA, J.; BOGAERTS, M.; LIEGEOIS, J.-P.; DEMAIFFE, D.; WILMART, E.; BOLLE, OL; DUCHESNE, J.-C.		58	7	0.01	542	1521	2500	XRF/ICPMS/INAA	METAMORPHIC	UNKNOWN	UNKNOWN	GNEISS																			33		73	8.47	33	7	1.4	5.98	0.9	4.56		2.4	0.37
VDA 9906		GEOROC	10.1016/S0301-9268(03)00084-6	DERIVATION OF THE 1.0-0.9 GA FERRO-POTASSIC A-TYPE GRANITOIDS OF SOUTHERN NORWAY BY EXTREME DIFFERENTIATION FROM BASIC MAGMAS	PREC. RESEARCH	VANDER AUWERA, J.; BOGAERTS, M.; LIEGEOIS, J.-P.; DEMAIFFE, D.; WILMART, E.; BOLLE, OL; DUCHESNE, J.-C.		58	7	0.01	542	1521	2500	TIMS	METAMORPHIC	UNKNOWN	UNKNOWN	GNEISS
PC-173B		GEOROC	10.1093/petrology/egr014	IMPLICATIONS OF THE NUVVUAGITTUQ GREENSTONE BELT FOR THE FORMATION OF EARTHS EARLY CRUST	J. PETROL.	O^NEIL, J.; FRANCIS, D. M.; CARLSON, R. W.		58	-77	0.01				XRF	METAMORPHIC	UNKNOWN	UNKNOWN	GNEISS	47.44	0.667	14.22				12.3634	15.46	2.05	1.23	1.56	0.069	0.196
PC-173B		GEOROC	10.1093/petrology/egr014	IMPLICATIONS OF THE NUVVUAGITTUQ GREENSTONE BELT FOR THE FORMATION OF EARTHS EARLY CRUST	J. PETROL.	O^NEIL, J.; FRANCIS, D. M.; CARLSON, R. W.		58	-77	0.01				IGN	METAMORPHIC	UNKNOWN	UNKNOWN	GNEISS														3.81
PC-401		GEOROC	10.1093/petrology/egr014	IMPLICATIONS OF THE NUVVUAGITTUQ GREENSTONE BELT FOR THE FORMATION OF EARTHS EARLY CRUST	J. PETROL.	O^NEIL, J.; FRANCIS, D. M.; CARLSON, R. W.		58	-77	0.01				XRF	METAMORPHIC	UNKNOWN	UNKNOWN	GNEISS	60.05	0.332	16.06				11.8415	4.96	2.38	0.6	1.36	0.023	0.415
PC-401		GEOROC	10.1093/petrology/egr014	IMPLICATIONS OF THE NUVVUAGITTUQ GREENSTONE BELT FOR THE FORMATION OF EARTHS EARLY CRUST	J. PETROL.	O^NEIL, J.; FRANCIS, D. M.; CARLSON, R. W.		58	-77	0.01				IGN	METAMORPHIC	UNKNOWN	UNKNOWN	GNEISS														1.76
PC-401		GEOROC	10.1093/petrology/egr014	IMPLICATIONS OF THE NUVVUAGITTUQ GREENSTONE BELT FOR THE FORMATION OF EARTHS EARLY CRUST	J. PETROL.	O^NEIL, J.; FRANCIS, D. M.; CARLSON, R. W.		58	-77	0.01				ICPMS	METAMORPHIC	UNKNOWN	UNKNOWN	GNEISS																			2.1		2.74	0.32	1.91	0.67	0.194	1.41	0.31	2.33	0.59	2.16	0.379
(20)TG124		GEOROC	10.1098/rsta.1972.0002	ORIGIN OF THE EARLY MESOZOIC GRANITIC ROCKS IN THE HIDA TERRANE, JAPAN, AND ITS IMPLICATION FOR EVOLUTION OF THE CONTINENTAL CRUST	J. SCI. HIROSHIMA UNIV., SER. C	TANAKA, S.		35.8	136	0.01				XRF	METAMORPHIC	UNKNOWN	UNKNOWN	GNEISS	48.06	2.17	21.3	14.78				1.79	3.32		1.84		0.1
(20)TG124		GEOROC	10.1098/rsta.1972.0002	ORIGIN OF THE EARLY MESOZOIC GRANITIC ROCKS IN THE HIDA TERRANE, JAPAN, AND ITS IMPLICATION FOR EVOLUTION OF THE CONTINENTAL CRUST	J. SCI. HIROSHIMA UNIV., SER. C	TANAKA, S.		35.8	136	0.01				TIMS	METAMORPHIC	UNKNOWN	UNKNOWN	GNEISS
(20)TG124		GEOROC	10.1098/rsta.1972.0002	ORIGIN OF THE EARLY MESOZOIC GRANITIC ROCKS IN THE HIDA TERRANE, JAPAN, AND ITS IMPLICATION FOR EVOLUTION OF THE CONTINENTAL CRUST	J. SCI. HIROSHIMA UNIV., SER. C	TANAKA, S.		35.8	136	0.01				MS_ID	METAMORPHIC	UNKNOWN	UNKNOWN	GNEISS																							21	4.45
(20)TG124		GEOROC	10.1098/rsta.1972.0002	ORIGIN OF THE EARLY MESOZOIC GRANITIC ROCKS IN THE HIDA TERRANE, JAPAN, AND ITS IMPLICATION FOR EVOLUTION OF THE CONTINENTAL CRUST	J. SCI. HIROSHIMA UNIV., SER. C	TANAKA, S.		35.8	136	0.01				AAS	METAMORPHIC	UNKNOWN	UNKNOWN	GNEISS
IBG494		GEOROC	10.1130/B30891.1	RB-SR WHOLE-ROCK AGE OF PERALKALINE ACIDIC VOLCANICS IN THE MACEDO DE CAVALEIROS AREA, TRÁS-OS-MONTES (NE PORTUGAL)	COMUNICACOES SERV. GEOL. PORTUGAL	RIBEIRO, M. L.; PRIEM, H. N. A.; BOELRIJK, N. A. I. M.; SCHERMERHORN, L. J. G.		41.53	-6.95	0.01	473	473	473	XRF	METAMORPHIC	UNKNOWN	UNKNOWN	GNEISS
IBG494		GEOROC	10.1130/B30891.1	RB-SR WHOLE-ROCK AGE OF PERALKALINE ACIDIC VOLCANICS IN THE MACEDO DE CAVALEIROS AREA, TRÁS-OS-MONTES (NE PORTUGAL)	COMUNICACOES SERV. GEOL. PORTUGAL	RIBEIRO, M. L.; PRIEM, H. N. A.; BOELRIJK, N. A. I. M.; SCHERMERHORN, L. J. G.		41.53	-6.95	0.01	473	473	473	TIMS	METAMORPHIC	UNKNOWN	UNKNOWN	GNEISS
7		GEOROC	10.1130/B30790.1	THE NATURE AND SIGNIFICANCE OF PRE-YELLOWKNIFE SUPERGROUP ROCKS IN THE POINT LAKE AREA, SLAVE STRUCTURAL PROVINCE, CANADA	SPEC. PAP. GEOL. ASSOC. CAN.	EASTON, R. M.		65.17	-113	0.01	2500	3175	3850	NOT GIVEN	METAMORPHIC	UNKNOWN	UNKNOWN	GNEISS	77	0.08	13.6		1.86			0.86	1.2	5.3	0.65	0.05	0.03	1.13					52.9		108.3	7.3	33.3	5.9	1.46	6.2		3		1.6
G91-41		GEOROC	10.1016/0301-9268(95)00066-6	THE ITSAQ GNEISS COMPLEX OF SOUTHERN WEST GREENLAND; THE WORLD^S MOST EXTENSIVE RECORD OF EARLY CRUSTAL EVOLUTION (3900-3600 MA)	PREC. RESEARCH	NUTMAN, A. P.; MCGREGOR, V. R.; FRIEND, C. R. L.; BENNETT, V. C.; KINNY, P. D.		63.925	-51.7333	0.01				XRF	METAMORPHIC	UNKNOWN	UNKNOWN	GNEISS	52.82	0.84	20.95	5.58				4.53	5.23	3.92	2.89	0.3	0.05
G91-41		GEOROC	10.1016/0301-9268(95)00066-6	THE ITSAQ GNEISS COMPLEX OF SOUTHERN WEST GREENLAND; THE WORLD^S MOST EXTENSIVE RECORD OF EARLY CRUSTAL EVOLUTION (3900-3600 MA)	PREC. RESEARCH	NUTMAN, A. P.; MCGREGOR, V. R.; FRIEND, C. R. L.; BENNETT, V. C.; KINNY, P. D.		63.925	-51.7333	0.01				SHRIMP	METAMORPHIC	UNKNOWN	UNKNOWN	GNEISS
G91-41		GEOROC	10.1016/0301-9268(95)00066-6	THE ITSAQ GNEISS COMPLEX OF SOUTHERN WEST GREENLAND; THE WORLD^S MOST EXTENSIVE RECORD OF EARLY CRUSTAL EVOLUTION (3900-3600 MA)	PREC. RESEARCH	NUTMAN, A. P.; MCGREGOR, V. R.; FRIEND, C. R. L.; BENNETT, V. C.; KINNY, P. D.		63.925	-51.7333	0.01				IGN	METAMORPHIC	UNKNOWN	UNKNOWN	GNEISS														0.87
G91-41		GEOROC	10.1016/0301-9268(95)00066-6	THE ITSAQ GNEISS COMPLEX OF SOUTHERN WEST GREENLAND; THE WORLD^S MOST EXTENSIVE RECORD OF EARLY CRUSTAL EVOLUTION (3900-3600 MA)	PREC. RESEARCH	NUTMAN, A. P.; MCGREGOR, V. R.; FRIEND, C. R. L.; BENNETT, V. C.; KINNY, P. D.		63.925	-51.7333	0.01				ICPMS	METAMORPHIC	UNKNOWN	UNKNOWN	GNEISS																			9.46		19	2.3	8.4	1.39	0.597	0.893	0.113	0.455	0.079	0.199
Z4HO		GEOROC	10.1007/BF00381291	HIGH D18O AND POSSIBLE PRE-ERUPTIONAL RB-SR ISOCHRONS IN CORDIERITE-BEARING NEOGENE VOLCANICS FROM SE SPAIN	CONTRIB. MINERAL. PETROL.	MUNKSGAARD, N. C.		37	-2.4	0.01	2.6	12.8	23	XRF	METAMORPHIC	UNKNOWN	UNKNOWN	GNEISS	42.76										3.68
Z4HO		GEOROC	10.1007/BF00381291	HIGH D18O AND POSSIBLE PRE-ERUPTIONAL RB-SR ISOCHRONS IN CORDIERITE-BEARING NEOGENE VOLCANICS FROM SE SPAIN	CONTRIB. MINERAL. PETROL.	MUNKSGAARD, N. C.		37	-2.4	0.01	2.6	12.8	23	TIMS	METAMORPHIC	UNKNOWN	UNKNOWN	GNEISS
M366		GEOROC	10.1016/j.epsl.2006.01.052	PETROCHEMICAL STUDIES OF THE RYOKE GRANITIC ROCKS FROM THE RIVER KOSHIBU DISTRICT, CENTRAL JAPAN	J. FAC. SCI., SHINSHU UNIV.	YAMADA, T.		35.5	138	0.01				SPECC	METAMORPHIC	UNKNOWN	UNKNOWN	GNEISS
M366		GEOROC	10.1016/j.epsl.2006.01.052	PETROCHEMICAL STUDIES OF THE RYOKE GRANITIC ROCKS FROM THE RIVER KOSHIBU DISTRICT, CENTRAL JAPAN	J. FAC. SCI., SHINSHU UNIV.	YAMADA, T.		35.5	138	0.01				NOT GIVEN	METAMORPHIC	UNKNOWN	UNKNOWN	GNEISS	71.19	0.28	14.87	1.05		1.63		0.71	1.91	3.22	4.14	0.06	0.05		0.45	0.84
PC-68		GEOROC	10.1093/petrology/egr014	IMPLICATIONS OF THE NUVVUAGITTUQ GREENSTONE BELT FOR THE FORMATION OF EARTHS EARLY CRUST	J. PETROL.	O^NEIL, J.; FRANCIS, D. M.; CARLSON, R. W.		58	-77	0.01				XRF	METAMORPHIC	UNKNOWN	UNKNOWN	GNEISS	49.6	0.396	16.99				9.80793	9.48	8.09	2.07	0.68	0.041	0.171
PC-68		GEOROC	10.1093/petrology/egr014	IMPLICATIONS OF THE NUVVUAGITTUQ GREENSTONE BELT FOR THE FORMATION OF EARTHS EARLY CRUST	J. PETROL.	O^NEIL, J.; FRANCIS, D. M.; CARLSON, R. W.		58	-77	0.01				IGN	METAMORPHIC	UNKNOWN	UNKNOWN	GNEISS														1.8
M306		GEOROC	10.1093/petrology/25.3.644	PETROCHEMICAL STUDIES OF THE RYOKE GRANITIC ROCKS FROM THE RIVER KOSHIBU DISTRICT, CENTRAL JAPAN	J. FAC. SCI., SHINSHU UNIV.	YAMADA, T.		35.5	138	0.01				SPECC	METAMORPHIC	UNKNOWN	UNKNOWN	GNEISS
M306		GEOROC	10.1093/petrology/25.3.644	PETROCHEMICAL STUDIES OF THE RYOKE GRANITIC ROCKS FROM THE RIVER KOSHIBU DISTRICT, CENTRAL JAPAN	J. FAC. SCI., SHINSHU UNIV.	YAMADA, T.		35.5	138	0.01				NOT GIVEN	METAMORPHIC	UNKNOWN	UNKNOWN	GNEISS	64.98	0.4	18.06	1.37		3.06		0.51	4.93	4.46	0.6	0.15			0.49	0.43
183-1137A-35-2,44-46		GEOROC	10.1130/0091-7613(2001)029<0147:OOCCII>2.0.CO;2	ORIGIN OF CONTINENTAL COMPONENTS IN INDIAN OCEAN BASALTS: EVIDENCE FROM ELAN BANK (KERGUELEN PLATEAU, ODP LEG 183, SITE 1173)	GEOLOGY	WEIS, D.; INGLE, S. P.; DAMASCENO, D.; FREY, F. A.; NICOLAYSEN, K. P.; BARLING, J.	ODP	-56.8333	68.0933	0.01				TIMS	METAMORPHIC	UNKNOWN	UNKNOWN	GNEISS
PC-274		GEOROC	10.1093/petrology/egr014	IMPLICATIONS OF THE NUVVUAGITTUQ GREENSTONE BELT FOR THE FORMATION OF EARTHS EARLY CRUST	J. PETROL.	O^NEIL, J.; FRANCIS, D. M.; CARLSON, R. W.		58	-77	0.01				XRF	METAMORPHIC	UNKNOWN	UNKNOWN	GNEISS	50.35	0.562	16.18				10.0419	13.67	0.14	0.05	1.74	0.064	0.172
PC-274		GEOROC	10.1093/petrology/egr014	IMPLICATIONS OF THE NUVVUAGITTUQ GREENSTONE BELT FOR THE FORMATION OF EARTHS EARLY CRUST	J. PETROL.	O^NEIL, J.; FRANCIS, D. M.; CARLSON, R. W.		58	-77	0.01				IGN	METAMORPHIC	UNKNOWN	UNKNOWN	GNEISS														6.61
PC-274		GEOROC	10.1093/petrology/egr014	IMPLICATIONS OF THE NUVVUAGITTUQ GREENSTONE BELT FOR THE FORMATION OF EARTHS EARLY CRUST	J. PETROL.	O^NEIL, J.; FRANCIS, D. M.; CARLSON, R. W.		58	-77	0.01				ICPMS	METAMORPHIC	UNKNOWN	UNKNOWN	GNEISS																			12.2		23.2	2.49	10.1	2.24	0.615	2.49	0.51	3.38	0.72	2.23	0.346
OES-99-13		GEOROC	10.1016/S0301-9268(02)00026-8	U-PB GEOCHRONOLOGY AND GEOCHEMISTRY OF EARLY PROTEROZOIC ROCKS OF THE TECTONIC BASEMENT WINDOWS IN CENTRAL NORDLAND, CALEDONIDES OF NORTH-CENTRAL NORWAY	PREC. RESEARCH	SKAR, O.		66	12.5	0.01				XRF	METAMORPHIC	UNKNOWN	UNKNOWN	GNEISS	73.11	0.36	13.7		2.11			0.28	0.79	2.73	5.95	0.05	0.04						81		170		67
OES-99-13		GEOROC	10.1016/S0301-9268(02)00026-8	U-PB GEOCHRONOLOGY AND GEOCHEMISTRY OF EARLY PROTEROZOIC ROCKS OF THE TECTONIC BASEMENT WINDOWS IN CENTRAL NORDLAND, CALEDONIDES OF NORTH-CENTRAL NORWAY	PREC. RESEARCH	SKAR, O.		66	12.5	0.01				IGN	METAMORPHIC	UNKNOWN	UNKNOWN	GNEISS														0.23
OES-00-18		GEOROC	10.1016/S0301-9268(02)00026-8	U-PB GEOCHRONOLOGY AND GEOCHEMISTRY OF EARLY PROTEROZOIC ROCKS OF THE TECTONIC BASEMENT WINDOWS IN CENTRAL NORDLAND, CALEDONIDES OF NORTH-CENTRAL NORWAY	PREC. RESEARCH	SKAR, O.		66.5	12	0.01				XRF	METAMORPHIC	UNKNOWN	UNKNOWN	GNEISS	59.37	0.93	17.07		6.32			1.77	4	3.84	4.15	0.49	0.15						77		151		64
OES-00-18		GEOROC	10.1016/S0301-9268(02)00026-8	U-PB GEOCHRONOLOGY AND GEOCHEMISTRY OF EARLY PROTEROZOIC ROCKS OF THE TECTONIC BASEMENT WINDOWS IN CENTRAL NORDLAND, CALEDONIDES OF NORTH-CENTRAL NORWAY	PREC. RESEARCH	SKAR, O.		66.5	12	0.01				IGN	METAMORPHIC	UNKNOWN	UNKNOWN	GNEISS														0.64
OES-00-7		GEOROC	10.1016/S0301-9268(02)00026-8	U-PB GEOCHRONOLOGY AND GEOCHEMISTRY OF EARLY PROTEROZOIC ROCKS OF THE TECTONIC BASEMENT WINDOWS IN CENTRAL NORDLAND, CALEDONIDES OF NORTH-CENTRAL NORWAY	PREC. RESEARCH	SKAR, O.		66	12.5	0.01				XRF	METAMORPHIC	UNKNOWN	UNKNOWN	GNEISS	61.36	1.16	16.08		6.74			1.57	2.91	2.97	5.14	0.59	0.14						64		119		53
OES-00-7		GEOROC	10.1016/S0301-9268(02)00026-8	U-PB GEOCHRONOLOGY AND GEOCHEMISTRY OF EARLY PROTEROZOIC ROCKS OF THE TECTONIC BASEMENT WINDOWS IN CENTRAL NORDLAND, CALEDONIDES OF NORTH-CENTRAL NORWAY	PREC. RESEARCH	SKAR, O.		66	12.5	0.01				IGN	METAMORPHIC	UNKNOWN	UNKNOWN	GNEISS														0.44
B-79-15E		GEOROC	10.1093/petrology/egp048	GEOCHRONOLOGIC AND SR-ISOTOPIC STUDIES OF CERTAIN UNITS IN THE BARBERTON GRANITE-GREENSTONE TERRANE, SOUTH AFRICA	SPEC. PUBL. GEOL. SOC. S. AFR.	BARTON, J. M. JR.; ROBB, L. J.; ANHAEUSSER, C. R.; VAN NIEROP, D. A.		-25.8	31	0.01	2500	3175	3850	NOT GIVEN	METAMORPHIC	UNKNOWN	UNKNOWN	GNEISS
PE37		GEOROC	10.1016/j.epsl.2010.04.031	ANDEAN CENOZOIC VOLCANISM: MAGMA GENESIS IN THE LIGHT OF STRONTIUM ISOTOPIC COMPOSITION AND TRACE ELEMENT GEOCHEMISTRY	YEAR BOOK CARNEGIE INST. WASHINGTON	JAMES, D. E.; BROOKS, C. K.; CUYUBAMBA, A.		-17.15	-69.85	0.01				NOT GIVEN	METAMORPHIC	UNKNOWN	UNKNOWN	GNEISS	67.2
PE37		GEOROC	10.1126/science.210.4475.1245	ORIGIN OF LEAD IN ANDEAN CALC-ALKALINE LAVAS, SOUTHERN PERU	SCIENCE	TILTON, G. R.; BAREIRO, B.		-17.15	-69.85	0.01				TIMS_ID	METAMORPHIC	UNKNOWN	UNKNOWN	GNEISS
PE37		GEOROC	10.1126/science.210.4475.1245	ORIGIN OF LEAD IN ANDEAN CALC-ALKALINE LAVAS, SOUTHERN PERU	SCIENCE	TILTON, G. R.; BAREIRO, B.		-17.15	-69.85	0.01				TIMS	METAMORPHIC	UNKNOWN	UNKNOWN	GNEISS
121706A		GEOROC	10.1093/petrology/egp048	RB-SR WHOLE ROCK ISOCHRON AGES OF GRANITIC ROCKS FROM THE CENTRAL KYUSHU, JAPAN	MEM. GEOL. SOC. JAPAN	OSANAI, Y.; MASAO, S.; KAGAMI, H.		33.3	131.3	0.01	132.1	132.1	132.1	NOT GIVEN	METAMORPHIC	UNKNOWN	UNKNOWN	GNEISS
BH107		GEOROC	10.1144/GSL.SP.1987.033.01.27	THE GEOCHEMISTRY OF THE LOWER PROTEROZOIC WILLYAMA COMPLEX VOLCANICS, BROKEN HILL BLOCK, NEW SOUTH WALES	SPEC. PUBL. GEOL. SOC. LONDON	JAMES, S. D.; PEARCE, J. A.; OLIVER, R. A.		-31.5	141	0.01				XRF	METAMORPHIC	UNKNOWN	UNKNOWN	GNEISS	50.6	1.33	13.14		14.44			7.3	10.82	1.94	0.18	0.08	0.23
BH107		GEOROC	10.1144/GSL.SP.1987.033.01.27	THE GEOCHEMISTRY OF THE LOWER PROTEROZOIC WILLYAMA COMPLEX VOLCANICS, BROKEN HILL BLOCK, NEW SOUTH WALES	SPEC. PUBL. GEOL. SOC. LONDON	JAMES, S. D.; PEARCE, J. A.; OLIVER, R. A.		-31.5	141	0.01				INAA	METAMORPHIC	UNKNOWN	UNKNOWN	GNEISS																			4.08		12.27		9.58	3.02			0.62
BH107		GEOROC	10.1144/GSL.SP.1987.033.01.27	THE GEOCHEMISTRY OF THE LOWER PROTEROZOIC WILLYAMA COMPLEX VOLCANICS, BROKEN HILL BLOCK, NEW SOUTH WALES	SPEC. PUBL. GEOL. SOC. LONDON	JAMES, S. D.; PEARCE, J. A.; OLIVER, R. A.		-31.5	141	0.01				AAS	METAMORPHIC	UNKNOWN	UNKNOWN	GNEISS
BH27		GEOROC	10.1144/GSL.SP.1987.033.01.27	THE GEOCHEMISTRY OF THE LOWER PROTEROZOIC WILLYAMA COMPLEX VOLCANICS, BROKEN HILL BLOCK, NEW SOUTH WALES	SPEC. PUBL. GEOL. SOC. LONDON	JAMES, S. D.; PEARCE, J. A.; OLIVER, R. A.		-31.5	141	0.01				XRF	METAMORPHIC	UNKNOWN	UNKNOWN	GNEISS	50	1.55	13.04		15.26			6.34	10.22	1.84	0.2	0.13	0.22
BH27		GEOROC	10.1144/GSL.SP.1987.033.01.27	THE GEOCHEMISTRY OF THE LOWER PROTEROZOIC WILLYAMA COMPLEX VOLCANICS, BROKEN HILL BLOCK, NEW SOUTH WALES	SPEC. PUBL. GEOL. SOC. LONDON	JAMES, S. D.; PEARCE, J. A.; OLIVER, R. A.		-31.5	141	0.01				INAA	METAMORPHIC	UNKNOWN	UNKNOWN	GNEISS																			4.59		12.76		10.85	3.25			0.73
BH27		GEOROC	10.1144/GSL.SP.1987.033.01.27	THE GEOCHEMISTRY OF THE LOWER PROTEROZOIC WILLYAMA COMPLEX VOLCANICS, BROKEN HILL BLOCK, NEW SOUTH WALES	SPEC. PUBL. GEOL. SOC. LONDON	JAMES, S. D.; PEARCE, J. A.; OLIVER, R. A.		-31.5	141	0.01				AAS	METAMORPHIC	UNKNOWN	UNKNOWN	GNEISS
GZS-1		GEOROC	10.1016/S0024-4937(02)00253-0	GRANULITE XENOLITHS FROM CENOZOIC BASALTS IN SE CHINA PROVIDE GEOCHEMICAL FINGERPRINTS TO DISTINGUISH LOWER CRUST TERRANES FROM THE NORTH AND SOUTH CHINA TECTONIC BLOCKS	LITHOS	YU, JINHAI; XU, XISHENG; O^REILLY, S. Y.; GRIFFIN, W. L.; ZHANG, MING		31.58	120.29	0.01				XRF	METAMORPHIC	UNKNOWN	UNKNOWN	GNEISS	77.88	0.06	10.8	1.51				0.81	3.06	2.24	0.54	0	0.01
GZS-1		GEOROC	10.1016/S0024-4937(02)00253-0	GRANULITE XENOLITHS FROM CENOZOIC BASALTS IN SE CHINA PROVIDE GEOCHEMICAL FINGERPRINTS TO DISTINGUISH LOWER CRUST TERRANES FROM THE NORTH AND SOUTH CHINA TECTONIC BLOCKS	LITHOS	YU, JINHAI; XU, XISHENG; O^REILLY, S. Y.; GRIFFIN, W. L.; ZHANG, MING		31.58	120.29	0.01				NOT GIVEN	METAMORPHIC	UNKNOWN	UNKNOWN	GNEISS						0.42									1.68	0.7
GZS-1		GEOROC	10.1016/S0024-4937(02)00253-0	GRANULITE XENOLITHS FROM CENOZOIC BASALTS IN SE CHINA PROVIDE GEOCHEMICAL FINGERPRINTS TO DISTINGUISH LOWER CRUST TERRANES FROM THE NORTH AND SOUTH CHINA TECTONIC BLOCKS	LITHOS	YU, JINHAI; XU, XISHENG; O^REILLY, S. Y.; GRIFFIN, W. L.; ZHANG, MING		31.58	120.29	0.01				ICPMS	METAMORPHIC	UNKNOWN	UNKNOWN	GNEISS																			7.36		10.6	1.01	3.02	0.34	1.04	0.25	0.04	0.14	0.04	0.12
MW35		GEOROC	10.1093/petrology/22.2.155	ISOTOPE GEOCHEMISTRY OF TERTIARY IGNEOUS ROCKS FROM THE ISLE OF SKYE, N.W. SCOTLAND	J. PETROL.	DICKIN, A. P.		58.5333	-4.65	0.01				XRF	METAMORPHIC	UNKNOWN	UNKNOWN	GNEISS
MW35		GEOROC	10.1093/petrology/22.2.155	ISOTOPE GEOCHEMISTRY OF TERTIARY IGNEOUS ROCKS FROM THE ISLE OF SKYE, N.W. SCOTLAND	J. PETROL.	DICKIN, A. P.		58.5333	-4.65	0.01				TIMS	METAMORPHIC	UNKNOWN	UNKNOWN	GNEISS
B-79-9C		GEOROC	10.1016/j.tecto.2009.11.013	GEOCHRONOLOGIC AND SR-ISOTOPIC STUDIES OF CERTAIN UNITS IN THE BARBERTON GRANITE-GREENSTONE TERRANE, SOUTH AFRICA	SPEC. PUBL. GEOL. SOC. S. AFR.	BARTON, J. M. JR.; ROBB, L. J.; ANHAEUSSER, C. R.; VAN NIEROP, D. A.		-26.05	31	0.01	2500	3175	3850	NOT GIVEN	METAMORPHIC	UNKNOWN	UNKNOWN	GNEISS
163		GEOROC	10.1007/BF00306482	GEOLOGY OF DÔGO, OKI ISLANDS, IN THE JAPAN SEA	J. SHANGHAI SCI. INST., SER. II	TOMITA, T.		36.3	133.3	0.01				NOT GIVEN	METAMORPHIC	UNKNOWN	UNKNOWN	GNEISS	66.35	0.96	14.54	0.39		5.61		1.6	2.03	2.36	3.27	0.17	0.03
163		GEOROC	10.1007/BF00306482	GEOLOGY OF DÔGO, OKI ISLANDS, IN THE JAPAN SEA	J. SHANGHAI SCI. INST., SER. II	TOMITA, T.		36.3	133.3	0.01				IGN	METAMORPHIC	UNKNOWN	UNKNOWN	GNEISS														2.6
5280815		GEOROC	10.1029/2000GC000137	PETROCHEMICAL STUDIES OF THE RYOKE GRANITIC ROCKS FROM THE RIVER KOSHIBU DISTRICT, CENTRAL JAPAN	J. FAC. SCI., SHINSHU UNIV.	YAMADA, T.		35.5	138	0.01				NOT GIVEN	METAMORPHIC	UNKNOWN	UNKNOWN	GNEISS	59.77	1.07	17.26	1.41		4.72		1.92	5.54	3.93	1.93	0.15	0.12		0.42	1.62
1(73KM139)		GEOROC	10.5575/geosoc.86.687	GEOLOGICAL STUDY OF THE NORTHERN-HALF OF WESTERN PART OF HIDA METAMORPHIC REGION, CENTRAL JAPAN.	J. GEOL. SOC. JAPAN	KANO, T.		35.8	136	0.01				NOT GIVEN	METAMORPHIC	UNKNOWN	UNKNOWN	GNEISS	58.22	0.68	17.43	0.98		6		2.57	4.99	4.57	2.51	0.21	0.13	1.07
47		GEOROC	10.1080/00288306.1958.10423187	PETROGENETIC IMPLICATIONS OF THE 1954 NGAURUHOE LAVA AND ITS XENOLITHS	NEW ZEALAND J. GEOL. GEOPHYS.	STEINER, A.		-39.13	175.642	0.01				NOT GIVEN	METAMORPHIC	UNKNOWN	UNKNOWN	GNEISS	74.8	0.19	15.2	0.1		1.75		0.75	3.3	1.5	1.7	0.07	0.11		0.05	0.03
B-80-1C		GEOROC	10.1007/BF00373580	GEOCHRONOLOGIC AND SR-ISOTOPIC STUDIES OF CERTAIN UNITS IN THE BARBERTON GRANITE-GREENSTONE TERRANE, SOUTH AFRICA	SPEC. PUBL. GEOL. SOC. S. AFR.	BARTON, J. M. JR.; ROBB, L. J.; ANHAEUSSER, C. R.; VAN NIEROP, D. A.		-26	31	0.01	2500	3175	3850	NOT GIVEN	METAMORPHIC	UNKNOWN	UNKNOWN	GNEISS
C14-2		GEOROC	10.1007/BF01132327	A 3500 MA PLUTONIC AND VOLCANIC CALC-ALKALINE PROVINCE IN THE ARCHEAN EAST PILBARA BLOCK	CONTRIB. MINERAL. PETROL.	BICKLE, M. J.; BETTENAY, M. E.; BARLEY, M. E.; CHAPMAN, N. A.; GROVES, D. I.; CAMPBELL, I. H.; DE LAETER, J. R.		-21.25	119.25	0.01	3500	3500	3500	TIMS	METAMORPHIC	UNKNOWN	UNKNOWN	GNEISS
1		GEOROC	10.1007/BF00283322	THE MUD TANK CARBONATITE COMPLEX, CENTRAL AUSTRALIA- AN EXAMPLE OF METASOMATISM AT MID-CRUSTAL LEVELS	CONTRIB. MINERAL. PETROL.	CURRIE, K.L.; KNUTSON, J.; TEMBY, P.A.		-23.68	133.83	0.01	542	1521	2500	NOT GIVEN	METAMORPHIC	UNKNOWN	UNKNOWN	GNEISS	77.5	0.19	11.96	0.57		1.01		0.37	0.89	2.44	4.57	0.06	0.03	0.49							47
OES-99-63		GEOROC	10.1016/S0301-9268(02)00026-8	U-PB GEOCHRONOLOGY AND GEOCHEMISTRY OF EARLY PROTEROZOIC ROCKS OF THE TECTONIC BASEMENT WINDOWS IN CENTRAL NORDLAND, CALEDONIDES OF NORTH-CENTRAL NORWAY	PREC. RESEARCH	SKAR, O.		67	12.5	0.01				XRF	METAMORPHIC	UNKNOWN	UNKNOWN	GNEISS	78.36	0.13	11.96		0.96			0.01	0.32	3.22	4.42	0	0.03						40		68		8
OES-99-63		GEOROC	10.1016/S0301-9268(02)00026-8	U-PB GEOCHRONOLOGY AND GEOCHEMISTRY OF EARLY PROTEROZOIC ROCKS OF THE TECTONIC BASEMENT WINDOWS IN CENTRAL NORDLAND, CALEDONIDES OF NORTH-CENTRAL NORWAY	PREC. RESEARCH	SKAR, O.		67	12.5	0.01				TIMS_ID	METAMORPHIC	UNKNOWN	UNKNOWN	GNEISS																							12.63	1.77
OES-99-63		GEOROC	10.1016/S0301-9268(02)00026-8	U-PB GEOCHRONOLOGY AND GEOCHEMISTRY OF EARLY PROTEROZOIC ROCKS OF THE TECTONIC BASEMENT WINDOWS IN CENTRAL NORDLAND, CALEDONIDES OF NORTH-CENTRAL NORWAY	PREC. RESEARCH	SKAR, O.		67	12.5	0.01				TIMS	METAMORPHIC	UNKNOWN	UNKNOWN	GNEISS
OES-99-63		GEOROC	10.1016/S0301-9268(02)00026-8	U-PB GEOCHRONOLOGY AND GEOCHEMISTRY OF EARLY PROTEROZOIC ROCKS OF THE TECTONIC BASEMENT WINDOWS IN CENTRAL NORDLAND, CALEDONIDES OF NORTH-CENTRAL NORWAY	PREC. RESEARCH	SKAR, O.		67	12.5	0.01				IGN	METAMORPHIC	UNKNOWN	UNKNOWN	GNEISS														0.16
B-79-15H		GEOROC	10.1007/s00710-009-0064-3	GEOCHRONOLOGIC AND SR-ISOTOPIC STUDIES OF CERTAIN UNITS IN THE BARBERTON GRANITE-GREENSTONE TERRANE, SOUTH AFRICA	SPEC. PUBL. GEOL. SOC. S. AFR.	BARTON, J. M. JR.; ROBB, L. J.; ANHAEUSSER, C. R.; VAN NIEROP, D. A.		-25.8	31	0.01	2500	3175	3850	NOT GIVEN	METAMORPHIC	UNKNOWN	UNKNOWN	GNEISS
PC-143		GEOROC	10.1093/petrology/egr014	IMPLICATIONS OF THE NUVVUAGITTUQ GREENSTONE BELT FOR THE FORMATION OF EARTHS EARLY CRUST	J. PETROL.	O^NEIL, J.; FRANCIS, D. M.; CARLSON, R. W.		58	-77	0.01				XRF	METAMORPHIC	UNKNOWN	UNKNOWN	GNEISS	47.25	0.33	14.72				13.4612	14.24	0.12	0.03	2.26	0.024	0.147
PC-143		GEOROC	10.1093/petrology/egr014	IMPLICATIONS OF THE NUVVUAGITTUQ GREENSTONE BELT FOR THE FORMATION OF EARTHS EARLY CRUST	J. PETROL.	O^NEIL, J.; FRANCIS, D. M.; CARLSON, R. W.		58	-77	0.01				IGN	METAMORPHIC	UNKNOWN	UNKNOWN	GNEISS														6.24
S-.89		GEOROC	10.1007/s11471-008-2026-3	CORRELATION OF NEOPROTEROZOIC VOLCANISM IN THE SOUTHEASTERN WHITE SEA REGION AND WESTERN URALS: NEW AGE DATA ON THE SOLOZERO BASALTS (ONEGA GRABEN)	DOKL. EARTH SCI.	NOSOVA, A. A.; LARIONOVA, YU. O.; VERETENNIKOV, N. V.; YUTKINA, E. V.		60.5	61	0.01	542	1521	2500	TIMS_ID	METAMORPHIC	UNKNOWN	UNKNOWN	GNEISS																							2.41	15.7
S-.89		GEOROC	10.1007/s11471-008-2026-3	CORRELATION OF NEOPROTEROZOIC VOLCANISM IN THE SOUTHEASTERN WHITE SEA REGION AND WESTERN URALS: NEW AGE DATA ON THE SOLOZERO BASALTS (ONEGA GRABEN)	DOKL. EARTH SCI.	NOSOVA, A. A.; LARIONOVA, YU. O.; VERETENNIKOV, N. V.; YUTKINA, E. V.		60.5	61	0.01	542	1521	2500	TIMS	METAMORPHIC	UNKNOWN	UNKNOWN	GNEISS
96DS-40		GEOROC	10.1016/j.precamres.2003.12.017	BASEMENT TERRANE CORRELATIONS AND CRUSTAL RECYCLING IN THE WESTERN SUPERIOR PROVINCE: ND ISOTOPIC CHARACTER OF GRANITOID AND FELSIC VOLCANIC ROCKS IN THE WABIGOON SUBPROVINCE, N. ONTARIO, CANADA	PREC. RESEARCH	TOMLINSON, K. Y.; STOTT, G. M.; PERCIVAL, J. A.; STONE, D.		49.4	-91.7	0.01	2500	3175	3850	TIMS_ID	METAMORPHIC	UNKNOWN	UNKNOWN	GNEISS																							5.93	0.93
96DS-40		GEOROC	10.1016/j.precamres.2003.12.017	BASEMENT TERRANE CORRELATIONS AND CRUSTAL RECYCLING IN THE WESTERN SUPERIOR PROVINCE: ND ISOTOPIC CHARACTER OF GRANITOID AND FELSIC VOLCANIC ROCKS IN THE WABIGOON SUBPROVINCE, N. ONTARIO, CANADA	PREC. RESEARCH	TOMLINSON, K. Y.; STOTT, G. M.; PERCIVAL, J. A.; STONE, D.		49.4	-91.7	0.01	2500	3175	3850	TIMS	METAMORPHIC	UNKNOWN	UNKNOWN	GNEISS
PC-428		GEOROC	10.1093/petrology/egr014	IMPLICATIONS OF THE NUVVUAGITTUQ GREENSTONE BELT FOR THE FORMATION OF EARTHS EARLY CRUST	J. PETROL.	O^NEIL, J.; FRANCIS, D. M.; CARLSON, R. W.		58	-77	0.01				XRF	METAMORPHIC	UNKNOWN	UNKNOWN	GNEISS	49.85	0.355	15.93				8.14328	11.11	4.9	2.25	2.91	0.034	0.172
PC-428		GEOROC	10.1093/petrology/egr014	IMPLICATIONS OF THE NUVVUAGITTUQ GREENSTONE BELT FOR THE FORMATION OF EARTHS EARLY CRUST	J. PETROL.	O^NEIL, J.; FRANCIS, D. M.; CARLSON, R. W.		58	-77	0.01				IGN	METAMORPHIC	UNKNOWN	UNKNOWN	GNEISS														3.87
G93-15		GEOROC	10.2113/gsecongeo.90.5.1217	RARE EARTH ELEMENT GEOCHEMISTRY OF THE METAMORPHOSED VOLCANOGENIC MASSIVE SULFIDE DEPOSITS OF THE MANITOUWADGE MINING CAMP, SUPERIOR PROVINCE, CANADA: A POTENTIAL EXPLORATION TOOL?	ECON. GEOL.	SCHANDL, E. S.; GORTON, M. P.; WASTENEYS, H A.		49.2	-85.83	0.01	2500	3175	3850	INAA	METAMORPHIC	UNKNOWN	UNKNOWN	GNEISS					5.21					4.44									54.19		133.01		43.97	7.51	2		0.55
17483		GEOROC	10.1080/00288306.1987.10422179	PETROGRAPHY AND ORIGIN OF METASEDIMENTARY XENOLITHS IN LAVAS FROM TONGARIRO VOLCANIC CENTRE	NEW ZEALAND J. GEOL. GEOPHYS.	GRAHAM, I. J.		-39.28	175.57	0.01				XRF	METAMORPHIC	UNKNOWN	UNKNOWN	GNEISS	49.4	1.8	2.59	3.5		3.5		2.7	7.7	3.6	1.5	0.4	0.1
17483		GEOROC	10.1080/00288306.1987.10422179	PETROGRAPHY AND ORIGIN OF METASEDIMENTARY XENOLITHS IN LAVAS FROM TONGARIRO VOLCANIC CENTRE	NEW ZEALAND J. GEOL. GEOPHYS.	GRAHAM, I. J.		-39.28	175.57	0.01				TIMS	METAMORPHIC	UNKNOWN	UNKNOWN	GNEISS
17483		GEOROC	10.1080/00288306.1987.10422179	PETROGRAPHY AND ORIGIN OF METASEDIMENTARY XENOLITHS IN LAVAS FROM TONGARIRO VOLCANIC CENTRE	NEW ZEALAND J. GEOL. GEOPHYS.	GRAHAM, I. J.		-39.28	175.57	0.01				IGN	METAMORPHIC	UNKNOWN	UNKNOWN	GNEISS														1.2
17483		GEOROC	10.1080/00288306.1987.10422179	PETROGRAPHY AND ORIGIN OF METASEDIMENTARY XENOLITHS IN LAVAS FROM TONGARIRO VOLCANIC CENTRE	NEW ZEALAND J. GEOL. GEOPHYS.	GRAHAM, I. J.		-39.28	175.57	0.01				EMP (EPMA)	METAMORPHIC	UNKNOWN	UNKNOWN	GNEISS	64.41	0.25	18.32				4.05	0.61	0.39	3.7	6.27		0
SR12		GEOROC	10.1016/j.precamres.2006.05.006	ISOTOPIC AND GEOCHEMICAL EVIDENCE OF PROTEROZOIC EPISODIC CRUSTAL REWORKING WITHIN THE IRUMIDE BELT OF SOUTH-CENTRAL AFRICA, THE SOUTHERN METACRATONIC BOUNDARY OF AN ARCHAEAN BANGWEULU CRATON	PREC. RESEARCH	DE WAELE, B.; LIEGEOIS, J.-P.; NEMCHIN, A. A.; TEMBO, F.		-11	27	0.01	542	1521	2500	TIMS	METAMORPHIC	UNKNOWN	UNKNOWN	GNEISS
SR12		GEOROC	10.1016/j.precamres.2006.05.006	ISOTOPIC AND GEOCHEMICAL EVIDENCE OF PROTEROZOIC EPISODIC CRUSTAL REWORKING WITHIN THE IRUMIDE BELT OF SOUTH-CENTRAL AFRICA, THE SOUTHERN METACRATONIC BOUNDARY OF AN ARCHAEAN BANGWEULU CRATON	PREC. RESEARCH	DE WAELE, B.; LIEGEOIS, J.-P.; NEMCHIN, A. A.; TEMBO, F.		-11	27	0.01	542	1521	2500	IGN	METAMORPHIC	UNKNOWN	UNKNOWN	GNEISS														0.01
SR12		GEOROC	10.1016/j.precamres.2006.05.006	ISOTOPIC AND GEOCHEMICAL EVIDENCE OF PROTEROZOIC EPISODIC CRUSTAL REWORKING WITHIN THE IRUMIDE BELT OF SOUTH-CENTRAL AFRICA, THE SOUTHERN METACRATONIC BOUNDARY OF AN ARCHAEAN BANGWEULU CRATON	PREC. RESEARCH	DE WAELE, B.; LIEGEOIS, J.-P.; NEMCHIN, A. A.; TEMBO, F.		-11	27	0.01	542	1521	2500	ICPOES	METAMORPHIC	UNKNOWN	UNKNOWN	GNEISS	77.3	0.33	12.5		2.04			0.16	0.73	2.21	5.26	0.06
SR12		GEOROC	10.1016/j.precamres.2006.05.006	ISOTOPIC AND GEOCHEMICAL EVIDENCE OF PROTEROZOIC EPISODIC CRUSTAL REWORKING WITHIN THE IRUMIDE BELT OF SOUTH-CENTRAL AFRICA, THE SOUTHERN METACRATONIC BOUNDARY OF AN ARCHAEAN BANGWEULU CRATON	PREC. RESEARCH	DE WAELE, B.; LIEGEOIS, J.-P.; NEMCHIN, A. A.; TEMBO, F.		-11	27	0.01	542	1521	2500	ICPMS	METAMORPHIC	UNKNOWN	UNKNOWN	GNEISS																			118		288	22.5	80.3	16.8	1.43	15.1	2.9	15.6	2.87	8.69	1.59
A42-7		GEOROC	10.1007/BF01132327	A 3500 MA PLUTONIC AND VOLCANIC CALC-ALKALINE PROVINCE IN THE ARCHEAN EAST PILBARA BLOCK	CONTRIB. MINERAL. PETROL.	BICKLE, M. J.; BETTENAY, M. E.; BARLEY, M. E.; CHAPMAN, N. A.; GROVES, D. I.; CAMPBELL, I. H.; DE LAETER, J. R.		-21.25	119.25	0.01	3500	3500	3500	XRF	METAMORPHIC	UNKNOWN	UNKNOWN	GNEISS	71.68	0.31	15.53	0.73				0.71	2.55	5.16	1.76	0.09	0.05
A42-7		GEOROC	10.1007/BF01132327	A 3500 MA PLUTONIC AND VOLCANIC CALC-ALKALINE PROVINCE IN THE ARCHEAN EAST PILBARA BLOCK	CONTRIB. MINERAL. PETROL.	BICKLE, M. J.; BETTENAY, M. E.; BARLEY, M. E.; CHAPMAN, N. A.; GROVES, D. I.; CAMPBELL, I. H.; DE LAETER, J. R.		-21.25	119.25	0.01	3500	3500	3500	WET	METAMORPHIC	UNKNOWN	UNKNOWN	GNEISS						1.55									0.38	0.2
A42-7		GEOROC	10.1007/BF01132327	A 3500 MA PLUTONIC AND VOLCANIC CALC-ALKALINE PROVINCE IN THE ARCHEAN EAST PILBARA BLOCK	CONTRIB. MINERAL. PETROL.	BICKLE, M. J.; BETTENAY, M. E.; BARLEY, M. E.; CHAPMAN, N. A.; GROVES, D. I.; CAMPBELL, I. H.; DE LAETER, J. R.		-21.25	119.25	0.01	3500	3500	3500	TIMS	METAMORPHIC	UNKNOWN	UNKNOWN	GNEISS
A42-7		GEOROC	10.1007/BF01132327	A 3500 MA PLUTONIC AND VOLCANIC CALC-ALKALINE PROVINCE IN THE ARCHEAN EAST PILBARA BLOCK	CONTRIB. MINERAL. PETROL.	BICKLE, M. J.; BETTENAY, M. E.; BARLEY, M. E.; CHAPMAN, N. A.; GROVES, D. I.; CAMPBELL, I. H.; DE LAETER, J. R.		-21.25	119.25	0.01	3500	3500	3500	INAA	METAMORPHIC	UNKNOWN	UNKNOWN	GNEISS																			35.7		63		21	3.39	0.91		0.29		0.3		0.22
PA29		GEOROC	10.1016/0024-4937(94)90044-2	ARC RELATED JURASSIC IGNEOUS AND META-IGNEOUS ROCKS IN THE COSTAL CORDILLERA OF NORTHERN CHILE / REGION ANTOFAGASTA	LITHOS	LUCASSEN, F.; FRANZ, G.		-23.8	-70.5	0.01				ICPMS	METAMORPHIC	UNKNOWN	UNKNOWN	GNEISS																			6.89		14.7	1.95	10.14	3.39	1.15	2.91		2.67	0.54	1.79
B-77-41J		GEOROC	10.1007/BF02596866	GEOCHRONOLOGIC AND SR-ISOTOPIC STUDIES OF CERTAIN UNITS IN THE BARBERTON GRANITE-GREENSTONE TERRANE, SOUTH AFRICA	SPEC. PUBL. GEOL. SOC. S. AFR.	BARTON, J. M. JR.; ROBB, L. J.; ANHAEUSSER, C. R.; VAN NIEROP, D. A.		-26.1	31	0.01	2500	3175	3850	NOT GIVEN	METAMORPHIC	UNKNOWN	UNKNOWN	GNEISS
1		GEOROC	10.1016/j.jseaes.2015.07.005	LATE CRETACEOUS INFANT INTRA-OCEANIC ARC VOLCANISM, THE CENTRAL PONTIDES, TURKEY: PETROGENETIC AND TECTONIC IMPLICATIONS		SCHÜRMANN, H. M. E.		29.52	31.42	0.01				NOT GIVEN	METAMORPHIC	UNKNOWN	UNKNOWN	GNEISS	73.53	0.17	14.08	0.46		1.19		0.37	1.33	3.73	3.71	0.12	0.02		0.78	0.25
PC-131		GEOROC	10.1093/petrology/egr014	IMPLICATIONS OF THE NUVVUAGITTUQ GREENSTONE BELT FOR THE FORMATION OF EARTHS EARLY CRUST	J. PETROL.	O^NEIL, J.; FRANCIS, D. M.; CARLSON, R. W.		58	-77	0.01				XRF	METAMORPHIC	UNKNOWN	UNKNOWN	GNEISS	50.29	0.34	16.39				8.87213	11.43	5.17	2.06	1.93	0.033	0.18
PC-131		GEOROC	10.1093/petrology/egr014	IMPLICATIONS OF THE NUVVUAGITTUQ GREENSTONE BELT FOR THE FORMATION OF EARTHS EARLY CRUST	J. PETROL.	O^NEIL, J.; FRANCIS, D. M.; CARLSON, R. W.		58	-77	0.01				IGN	METAMORPHIC	UNKNOWN	UNKNOWN	GNEISS														2.91
PC-131		GEOROC	10.1093/petrology/egr014	IMPLICATIONS OF THE NUVVUAGITTUQ GREENSTONE BELT FOR THE FORMATION OF EARTHS EARLY CRUST	J. PETROL.	O^NEIL, J.; FRANCIS, D. M.; CARLSON, R. W.		58	-77	0.01				ICPMS	METAMORPHIC	UNKNOWN	UNKNOWN	GNEISS																			2.8		5.7	0.7	2.94	0.78	0.4	1.2	0.24	1.77	0.43	1.43	0.226
297-96		GEOROC	10.1130/0091-7613(1975)3<669:SRISVR>2.0.CO;2	SR87/SR86 RATIOS IN SOME VOLCANIC ROCKS AND SOME SEMIFUSED INCLUSIONS OF THE SAN FRANCISCO VOLCANIC FIELD	GEOLOGY	PUSHKAR, P.; STOESER, D. B.		35.25	-111.25	0.01				TIMS	METAMORPHIC	UNKNOWN	UNKNOWN	GNEISS
E99021_RESIDUE		GEOROC	10.2113/gsecongeo.96.6.1361	RADIOGENIC LEAD SIGNATURES IN AU-RICH VOLCANIC-HOSTED MASSIVE SULFIDE ORES AND ASSOCIATED VOLCANIC ROCKS OF THE EARLY TERTIARY MACUCHI ISLAND ARC (WESTERN CORDILLERA OF ECUADOR)	ECON. GEOL.	CHIARADIA, M.; FONTBOTE, L.		-4.05	-78.97	0.01				TIMS	METAMORPHIC	UNKNOWN	UNKNOWN	GNEISS
95TB 5A		GEOROC	10.1016/S0016-7037(97)00324-4	LATE ARCHEAN MANTLE COMPOSITION AND CRUSTAL GROWTH IN THE WESTERN SUPERIOR PROVINCE OF CANADA: NEODYMIUM AND LEAD ISOTOPIC EVIDENCE FROM THE WAWA, QUETICO, AND WABIGOON SUBPROVINCES	GEOCHIM. COSMOCHIM. ACTA	HENRY, P.; STEVENSON, R. K.; GARIEPY, C.		48.8	-91.5	0.01	2500	3175	3850	TIMS_ID	METAMORPHIC	UNKNOWN	UNKNOWN	GNEISS																							13.46	3.06
95TB 5A		GEOROC	10.1016/S0016-7037(97)00324-4	LATE ARCHEAN MANTLE COMPOSITION AND CRUSTAL GROWTH IN THE WESTERN SUPERIOR PROVINCE OF CANADA: NEODYMIUM AND LEAD ISOTOPIC EVIDENCE FROM THE WAWA, QUETICO, AND WABIGOON SUBPROVINCES	GEOCHIM. COSMOCHIM. ACTA	HENRY, P.; STEVENSON, R. K.; GARIEPY, C.		48.8	-91.5	0.01	2500	3175	3850	TIMS	METAMORPHIC	UNKNOWN	UNKNOWN	GNEISS
780107		GEOROC	10.1016/0301-9268(84)90050-0	PETROGRAPHY, CHEMISTRY AND ISOTOPIC AGES OF PENINSULAR GNEISS, DHARWAR ACID VOLCANIC ROCKS AND THE CHITRADURGA GRANITE WITH SPECIAL REFERENCE TO THE LATE ARCHAEAN EVOLUTION OF THE KARNATAKA CRATON, SOUTHERN INDIA	PREC. RESEARCH	TAYLOR, P. N.; CHADWICK, B.; MOORBATH, S.; RAMAKRISHNAN, M.; VISWANATHA, M. N.		13.32	75.78	0.01	2500	3175	3850	XRF	METAMORPHIC	UNKNOWN	UNKNOWN	GNEISS
780107		GEOROC	10.1016/0301-9268(84)90050-0	PETROGRAPHY, CHEMISTRY AND ISOTOPIC AGES OF PENINSULAR GNEISS, DHARWAR ACID VOLCANIC ROCKS AND THE CHITRADURGA GRANITE WITH SPECIAL REFERENCE TO THE LATE ARCHAEAN EVOLUTION OF THE KARNATAKA CRATON, SOUTHERN INDIA	PREC. RESEARCH	TAYLOR, P. N.; CHADWICK, B.; MOORBATH, S.; RAMAKRISHNAN, M.; VISWANATHA, M. N.		13.32	75.78	0.01	2500	3175	3850	TIMS	METAMORPHIC	UNKNOWN	UNKNOWN	GNEISS
OES-99-17		GEOROC	10.1016/S0301-9268(02)00026-8	U-PB GEOCHRONOLOGY AND GEOCHEMISTRY OF EARLY PROTEROZOIC ROCKS OF THE TECTONIC BASEMENT WINDOWS IN CENTRAL NORDLAND, CALEDONIDES OF NORTH-CENTRAL NORWAY	PREC. RESEARCH	SKAR, O.		66.5	12.5	0.01				XRF	METAMORPHIC	UNKNOWN	UNKNOWN	GNEISS	62.62	0.65	18.08		3.16			0.84	1.76	4.99	6.06	0.13	0.06						39		79		36
OES-99-17		GEOROC	10.1016/S0301-9268(02)00026-8	U-PB GEOCHRONOLOGY AND GEOCHEMISTRY OF EARLY PROTEROZOIC ROCKS OF THE TECTONIC BASEMENT WINDOWS IN CENTRAL NORDLAND, CALEDONIDES OF NORTH-CENTRAL NORWAY	PREC. RESEARCH	SKAR, O.		66.5	12.5	0.01				TIMS_ID	METAMORPHIC	UNKNOWN	UNKNOWN	GNEISS																							32.46	5.92
OES-99-17		GEOROC	10.1016/S0301-9268(02)00026-8	U-PB GEOCHRONOLOGY AND GEOCHEMISTRY OF EARLY PROTEROZOIC ROCKS OF THE TECTONIC BASEMENT WINDOWS IN CENTRAL NORDLAND, CALEDONIDES OF NORTH-CENTRAL NORWAY	PREC. RESEARCH	SKAR, O.		66.5	12.5	0.01				TIMS	METAMORPHIC	UNKNOWN	UNKNOWN	GNEISS
OES-99-17		GEOROC	10.1016/S0301-9268(02)00026-8	U-PB GEOCHRONOLOGY AND GEOCHEMISTRY OF EARLY PROTEROZOIC ROCKS OF THE TECTONIC BASEMENT WINDOWS IN CENTRAL NORDLAND, CALEDONIDES OF NORTH-CENTRAL NORWAY	PREC. RESEARCH	SKAR, O.		66.5	12.5	0.01				IGN	METAMORPHIC	UNKNOWN	UNKNOWN	GNEISS														0.35
493107		GEOROC	10.1016/j.precamres.2010.10.003	FIELD AND GEOCHEMICAL CHARACTERISTICS OF MESOARCHEAN TO NEOARCHEAN VOLCANIC ROCKS IN THE STOROE GREENSTONE BELT, SW GREENLAND: EVIDENCE FOR ACCRETION OF INTRA-OCEANIC VOLCANIC ARCS	PREC. RESEARCH	ORDONEZ-CALDERON, J. C.; POLAT, A.; FRYER, B. J.; GAGNON, J. E.		64.4078	-51.0935	0.01	2800	2930	3060	IGN	METAMORPHIC	UNKNOWN	UNKNOWN	GNEISS														0.55
493107		GEOROC	10.1016/j.precamres.2010.10.003	FIELD AND GEOCHEMICAL CHARACTERISTICS OF MESOARCHEAN TO NEOARCHEAN VOLCANIC ROCKS IN THE STOROE GREENSTONE BELT, SW GREENLAND: EVIDENCE FOR ACCRETION OF INTRA-OCEANIC VOLCANIC ARCS	PREC. RESEARCH	ORDONEZ-CALDERON, J. C.; POLAT, A.; FRYER, B. J.; GAGNON, J. E.		64.4078	-51.0935	0.01	2800	2930	3060	ICPOES	METAMORPHIC	UNKNOWN	UNKNOWN	GNEISS	48.82	2.64	21.98		12.53			2.23	3.88	4.76	2.75	0.22	0.18
493107		GEOROC	10.1016/j.precamres.2010.10.003	FIELD AND GEOCHEMICAL CHARACTERISTICS OF MESOARCHEAN TO NEOARCHEAN VOLCANIC ROCKS IN THE STOROE GREENSTONE BELT, SW GREENLAND: EVIDENCE FOR ACCRETION OF INTRA-OCEANIC VOLCANIC ARCS	PREC. RESEARCH	ORDONEZ-CALDERON, J. C.; POLAT, A.; FRYER, B. J.; GAGNON, J. E.		64.4078	-51.0935	0.01	2800	2930	3060	ICPMS	METAMORPHIC	UNKNOWN	UNKNOWN	GNEISS																			14.47		35.24	4.49	19.91	4.91	1.76	4.88	0.74	4.39	0.89	2.63	0.39
PC-251		GEOROC	10.1093/petrology/egr014	IMPLICATIONS OF THE NUVVUAGITTUQ GREENSTONE BELT FOR THE FORMATION OF EARTHS EARLY CRUST	J. PETROL.	O^NEIL, J.; FRANCIS, D. M.; CARLSON, R. W.		58	-77	0.01				XRF	METAMORPHIC	UNKNOWN	UNKNOWN	GNEISS	50.14	0.516	15.68				10.7077	13.72	0.33	0.12	2.66	0.06	0.212
PC-251		GEOROC	10.1093/petrology/egr014	IMPLICATIONS OF THE NUVVUAGITTUQ GREENSTONE BELT FOR THE FORMATION OF EARTHS EARLY CRUST	J. PETROL.	O^NEIL, J.; FRANCIS, D. M.; CARLSON, R. W.		58	-77	0.01				IGN	METAMORPHIC	UNKNOWN	UNKNOWN	GNEISS														5.5
PC-251		GEOROC	10.1093/petrology/egr014	IMPLICATIONS OF THE NUVVUAGITTUQ GREENSTONE BELT FOR THE FORMATION OF EARTHS EARLY CRUST	J. PETROL.	O^NEIL, J.; FRANCIS, D. M.; CARLSON, R. W.		58	-77	0.01				ICPMS	METAMORPHIC	UNKNOWN	UNKNOWN	GNEISS																			9.1		18.1	2	8.08	1.88	0.363	2.22	0.48	3.22	0.69	2.15	0.332
PC-251		GEOROC	10.1126/SCIENCE.1161925	NEODYMIUM-142 EVIDENCE FOR HADEAN MAFIC CRUST	SCIENCE	O^NEIL, J.; CARLSON, R. W.; FRANCIS, D. M.; STEVENSON, R. K.		58	-77	0.01				TIMS_ID	METAMORPHIC	UNKNOWN	UNKNOWN	GNEISS																							7.95	1.88
PC-251		GEOROC	10.1126/SCIENCE.1161925	NEODYMIUM-142 EVIDENCE FOR HADEAN MAFIC CRUST	SCIENCE	O^NEIL, J.; CARLSON, R. W.; FRANCIS, D. M.; STEVENSON, R. K.		58	-77	0.01				TIMS	METAMORPHIC	UNKNOWN	UNKNOWN	GNEISS
PC-251		GEOROC	10.1126/SCIENCE.1161925	NEODYMIUM-142 EVIDENCE FOR HADEAN MAFIC CRUST	SCIENCE	O^NEIL, J.; CARLSON, R. W.; FRANCIS, D. M.; STEVENSON, R. K.		58	-77	0.01				NOT GIVEN	METAMORPHIC	UNKNOWN	UNKNOWN	GNEISS
SR6		GEOROC	10.1016/j.precamres.2006.05.006	ISOTOPIC AND GEOCHEMICAL EVIDENCE OF PROTEROZOIC EPISODIC CRUSTAL REWORKING WITHIN THE IRUMIDE BELT OF SOUTH-CENTRAL AFRICA, THE SOUTHERN METACRATONIC BOUNDARY OF AN ARCHAEAN BANGWEULU CRATON	PREC. RESEARCH	DE WAELE, B.; LIEGEOIS, J.-P.; NEMCHIN, A. A.; TEMBO, F.		-11	27	0.01	542	1521	2500	ICPOES	METAMORPHIC	UNKNOWN	UNKNOWN	GNEISS	74.3	0.3	12.7		2.61			0.05	0.87	2.69	4.82	0.05
SR6		GEOROC	10.1016/j.precamres.2006.05.006	ISOTOPIC AND GEOCHEMICAL EVIDENCE OF PROTEROZOIC EPISODIC CRUSTAL REWORKING WITHIN THE IRUMIDE BELT OF SOUTH-CENTRAL AFRICA, THE SOUTHERN METACRATONIC BOUNDARY OF AN ARCHAEAN BANGWEULU CRATON	PREC. RESEARCH	DE WAELE, B.; LIEGEOIS, J.-P.; NEMCHIN, A. A.; TEMBO, F.		-11	27	0.01	542	1521	2500	ICPMS	METAMORPHIC	UNKNOWN	UNKNOWN	GNEISS																			207		409	41.8	152	39.8	3.33	45.1	10.5	54		29.6	4.9
UR16		GEOROC	10.2465/ganko1941.79.431	RB-SR AGES OF THE GNEISS AND METAMORPHOSED INTRUSIVE ROCKS OF THE HIDA METAMORPHIC BELT IN THE URUSHIYAMA AREA, GIFU PREFECTURE, CENTRAL JAPAN	J. JPN. ASSOC. MINERAL. PETROL. ECON. GEOL. (GANSEKI KOBUTSU KOSHO GAKKAI-SHI)	ARAKAWA, Y.		37	137.17	0.01				TIMS	METAMORPHIC	UNKNOWN	UNKNOWN	GNEISS
UR16		GEOROC	10.2465/ganko1941.79.431	RB-SR AGES OF THE GNEISS AND METAMORPHOSED INTRUSIVE ROCKS OF THE HIDA METAMORPHIC BELT IN THE URUSHIYAMA AREA, GIFU PREFECTURE, CENTRAL JAPAN	J. JPN. ASSOC. MINERAL. PETROL. ECON. GEOL. (GANSEKI KOBUTSU KOSHO GAKKAI-SHI)	ARAKAWA, Y.		37	137.17	0.01				MS_ID	METAMORPHIC	UNKNOWN	UNKNOWN	GNEISS
GNEISS, TTG, GRANULITE		GEOROC	10.2973/odp.proc.sr.131.119.1993	ACCRETION AND EVOLUTION OF AN ARCHEAN HIGH-GRADE GREY GNEISS-AMPHIBOLITE COMPLEX: THE FISKEFJORD AREA, SOUTHERN WEST GREENLAND	BULL. GEOL. GREENLAND SURV.	GARDE, A. A.		64.6	-51.1	0.01	2500	3175	3850	XRF	METAMORPHIC	UNKNOWN	UNKNOWN	GNEISS	69.22	0.35	15.64				2.91	1.24	4.1		0.68	0.12	0.06						13		24		11
GNEISS, TTG, GRANULITE		GEOROC	10.2973/odp.proc.sr.131.119.1993	ACCRETION AND EVOLUTION OF AN ARCHEAN HIGH-GRADE GREY GNEISS-AMPHIBOLITE COMPLEX: THE FISKEFJORD AREA, SOUTHERN WEST GREENLAND	BULL. GEOL. GREENLAND SURV.	GARDE, A. A.		64.6	-51.1	0.01	2500	3175	3850	TIT	METAMORPHIC	UNKNOWN	UNKNOWN	GNEISS				1.07		2.09
GNEISS, TTG, GRANULITE		GEOROC	10.2973/odp.proc.sr.131.119.1993	ACCRETION AND EVOLUTION OF AN ARCHEAN HIGH-GRADE GREY GNEISS-AMPHIBOLITE COMPLEX: THE FISKEFJORD AREA, SOUTHERN WEST GREENLAND	BULL. GEOL. GREENLAND SURV.	GARDE, A. A.		64.6	-51.1	0.01	2500	3175	3850	INAA	METAMORPHIC	UNKNOWN	UNKNOWN	GNEISS																			12.8		22		10	1.78	0.84		0.3
GNEISS, TTG, GRANULITE		GEOROC	10.2973/odp.proc.sr.131.119.1993	ACCRETION AND EVOLUTION OF AN ARCHEAN HIGH-GRADE GREY GNEISS-AMPHIBOLITE COMPLEX: THE FISKEFJORD AREA, SOUTHERN WEST GREENLAND	BULL. GEOL. GREENLAND SURV.	GARDE, A. A.		64.6	-51.1	0.01	2500	3175	3850	IGN	METAMORPHIC	UNKNOWN	UNKNOWN	GNEISS														0.36
GNEISS, TTG, GRANULITE		GEOROC	10.2973/odp.proc.sr.131.119.1993	ACCRETION AND EVOLUTION OF AN ARCHEAN HIGH-GRADE GREY GNEISS-AMPHIBOLITE COMPLEX: THE FISKEFJORD AREA, SOUTHERN WEST GREENLAND	BULL. GEOL. GREENLAND SURV.	GARDE, A. A.		64.6	-51.1	0.01	2500	3175	3850	AAS	METAMORPHIC	UNKNOWN	UNKNOWN	GNEISS										4.49
B-79-15L		GEOROC	10.1093/petrology/egu063	GEOCHRONOLOGIC AND SR-ISOTOPIC STUDIES OF CERTAIN UNITS IN THE BARBERTON GRANITE-GREENSTONE TERRANE, SOUTH AFRICA	SPEC. PUBL. GEOL. SOC. S. AFR.	BARTON, J. M. JR.; ROBB, L. J.; ANHAEUSSER, C. R.; VAN NIEROP, D. A.		-25.8	31	0.01	2500	3175	3850	NOT GIVEN	METAMORPHIC	UNKNOWN	UNKNOWN	GNEISS
PC-433		GEOROC	10.1093/petrology/egr014	IMPLICATIONS OF THE NUVVUAGITTUQ GREENSTONE BELT FOR THE FORMATION OF EARTHS EARLY CRUST	J. PETROL.	O^NEIL, J.; FRANCIS, D. M.; CARLSON, R. W.		58	-77	0.01				XRF	METAMORPHIC	UNKNOWN	UNKNOWN	GNEISS	50.75	0.366	16.71				9.34003	11.03	6.84	1.99	0.27	0.036	0.187
PC-433		GEOROC	10.1093/petrology/egr014	IMPLICATIONS OF THE NUVVUAGITTUQ GREENSTONE BELT FOR THE FORMATION OF EARTHS EARLY CRUST	J. PETROL.	O^NEIL, J.; FRANCIS, D. M.; CARLSON, R. W.		58	-77	0.01				IGN	METAMORPHIC	UNKNOWN	UNKNOWN	GNEISS														2.1
PC-433		GEOROC	10.1093/petrology/egr014	IMPLICATIONS OF THE NUVVUAGITTUQ GREENSTONE BELT FOR THE FORMATION OF EARTHS EARLY CRUST	J. PETROL.	O^NEIL, J.; FRANCIS, D. M.; CARLSON, R. W.		58	-77	0.01				ICPMS	METAMORPHIC	UNKNOWN	UNKNOWN	GNEISS																			3		4.6	0.51	2.23	0.59	0.199	1.01	0.23	1.69	0.4	1.35	0.22
17485		GEOROC	10.1080/00288306.1987.10422179	PETROGRAPHY AND ORIGIN OF METASEDIMENTARY XENOLITHS IN LAVAS FROM TONGARIRO VOLCANIC CENTRE	NEW ZEALAND J. GEOL. GEOPHYS.	GRAHAM, I. J.		-39.28	175.57	0.01				XRF	METAMORPHIC	UNKNOWN	UNKNOWN	GNEISS	72.5	0.6	13.9	0.7		3.3		1.3	4.5	2.2	0.9	0.2	0.1
17485		GEOROC	10.1080/00288306.1987.10422179	PETROGRAPHY AND ORIGIN OF METASEDIMENTARY XENOLITHS IN LAVAS FROM TONGARIRO VOLCANIC CENTRE	NEW ZEALAND J. GEOL. GEOPHYS.	GRAHAM, I. J.		-39.28	175.57	0.01				TIMS	METAMORPHIC	UNKNOWN	UNKNOWN	GNEISS
17485		GEOROC	10.1080/00288306.1987.10422179	PETROGRAPHY AND ORIGIN OF METASEDIMENTARY XENOLITHS IN LAVAS FROM TONGARIRO VOLCANIC CENTRE	NEW ZEALAND J. GEOL. GEOPHYS.	GRAHAM, I. J.		-39.28	175.57	0.01				IGN	METAMORPHIC	UNKNOWN	UNKNOWN	GNEISS														1.5
TA94/48		GEOROC	10.1180/minmag.1997.061.407.03	AGE AND PETROGENESIS OF THE QASSIARSUK CARBONATITE-ALKALINE SILICATE VOLCANIC COMPLEX IN THE GARDAR RIFT, SOUTH GREENLAND	MINERAL. MAG.	ANDERSEN, T.		61.15	-45.52	0.01				TIMS_ID	METAMORPHIC	UNKNOWN	UNKNOWN	GNEISS																							39	6.1
TA94/48		GEOROC	10.1180/minmag.1997.061.407.03	AGE AND PETROGENESIS OF THE QASSIARSUK CARBONATITE-ALKALINE SILICATE VOLCANIC COMPLEX IN THE GARDAR RIFT, SOUTH GREENLAND	MINERAL. MAG.	ANDERSEN, T.		61.15	-45.52	0.01				TIMS	METAMORPHIC	UNKNOWN	UNKNOWN	GNEISS
Y-19		GEOROC	10.1007/s00410-011-0679-3	PETROGENESIS OF THE NEOGENE VOLCANIC UNITS IN THE NE-SW-TRENDING BASINS IN WESTERN ANATOLIA, TURKEY	CONTRIB. MINERAL. PETROL.	ERSOY, Y.; HELVACI, C.; PALMER, M. R.		38.45	27.3	0.01	65.5	105.5	145.5	IGN	METAMORPHIC	UNKNOWN	UNKNOWN	GNEISS														2.1
Y-19		GEOROC	10.1007/s00410-011-0679-3	PETROGENESIS OF THE NEOGENE VOLCANIC UNITS IN THE NE-SW-TRENDING BASINS IN WESTERN ANATOLIA, TURKEY	CONTRIB. MINERAL. PETROL.	ERSOY, Y.; HELVACI, C.; PALMER, M. R.		38.45	27.3	0.01	65.5	105.5	145.5	ICPMS	METAMORPHIC	UNKNOWN	UNKNOWN	GNEISS																			33.6		75.7	8.41	33.8	6.9	1.47	6.99	1.16	6.83	1.3	3.71	0.47
Y-19		GEOROC	10.1007/s00410-011-0679-3	PETROGENESIS OF THE NEOGENE VOLCANIC UNITS IN THE NE-SW-TRENDING BASINS IN WESTERN ANATOLIA, TURKEY	CONTRIB. MINERAL. PETROL.	ERSOY, Y.; HELVACI, C.; PALMER, M. R.		38.45	27.3	0.01	65.5	105.5	145.5	ICPAES	METAMORPHIC	UNKNOWN	UNKNOWN	GNEISS	70.03	0.4	15.23		2.47			0.9	1.95	2.59	3.32	0.19	0.02
268-56		GEOROC	10.1016/j.gr.2009.09.001	ROLE OF THE OLLO DE SAPO MASSIVE FELSIC VOLCANISM OF NW IBERIA IN THE EARLY ORDOVICIAN DYNAMICS OF NORTHERN GONDWANA	GONDWANA RES.	DIEZ MONTES, A.; MARTINEZ CATALAN, J. R.; MULAS, F. B.		42.05	-6.63	0.01	472	480	488	NOT GIVEN	METAMORPHIC	UNKNOWN	UNKNOWN	GNEISS	67.63	0.47	16.05		4.09			1.24	1.07	2.6	4.56	0.19	0.04	1.88					29.9		58.9	8.87	27.15	5.25	1.32	5.15		4.88		2.86
S-90-116		GEOROC	10.1016/0301-9268(94)90102-3	GEOCHEMICAL EVOLUTION OF THE MINTO BLOCK: A 2.7 GA CONTINENTAL MAGMATIC ARC BUILT ON THE SUPERIOR PROTO-CRATON	PREC. RESEARCH	STERN, R. A.; PERCIVAL, J. A.; MORTENSEN, J. K.		58.016	-72.7096	0.01	2500	3175	3850	XRF	METAMORPHIC	UNKNOWN	UNKNOWN	GNEISS	68.75	0.43	16.35		3.43			1.46	3.73	4.44	1.25	0.11	0.04
S-90-116		GEOROC	10.1016/0301-9268(94)90102-3	GEOCHEMICAL EVOLUTION OF THE MINTO BLOCK: A 2.7 GA CONTINENTAL MAGMATIC ARC BUILT ON THE SUPERIOR PROTO-CRATON	PREC. RESEARCH	STERN, R. A.; PERCIVAL, J. A.; MORTENSEN, J. K.		58.016	-72.7096	0.01	2500	3175	3850	TIMS_ID	METAMORPHIC	UNKNOWN	UNKNOWN	GNEISS																							11.545	1.642
S-90-116		GEOROC	10.1016/0301-9268(94)90102-3	GEOCHEMICAL EVOLUTION OF THE MINTO BLOCK: A 2.7 GA CONTINENTAL MAGMATIC ARC BUILT ON THE SUPERIOR PROTO-CRATON	PREC. RESEARCH	STERN, R. A.; PERCIVAL, J. A.; MORTENSEN, J. K.		58.016	-72.7096	0.01	2500	3175	3850	TIMS	METAMORPHIC	UNKNOWN	UNKNOWN	GNEISS
S-90-116		GEOROC	10.1016/0301-9268(94)90102-3	GEOCHEMICAL EVOLUTION OF THE MINTO BLOCK: A 2.7 GA CONTINENTAL MAGMATIC ARC BUILT ON THE SUPERIOR PROTO-CRATON	PREC. RESEARCH	STERN, R. A.; PERCIVAL, J. A.; MORTENSEN, J. K.		58.016	-72.7096	0.01	2500	3175	3850	ICPAES	METAMORPHIC	UNKNOWN	UNKNOWN	GNEISS																			29		52		11.6	1.64	0.6	1.8		1.1
2		GEOROC	10.1016/j.lithos.2009.06.038	GEOLOGY AND GEOCHEMISTRY OF NUGGIHALLI SCHIST BELT, DHARWAR CRATON, KARNATAKA, INDIA	MEM. GEOL. SOC. INDIA	JAFRI, S. H.; KHAN, N.; AHMED, S. M.; SAXENA, R.		12.92	76.33	0.01	2500	3175	3850	NOT GIVEN	METAMORPHIC	UNKNOWN	UNKNOWN	GNEISS	61.58	0.64	14.51	0.72		5.08		5.4	2.47	7.45	0.05	0.04	0.11	0.28
B-78-10A		GEOROC	10.1016/J.JVOLGEORES.2013.09.005	GEOCHRONOLOGIC AND SR-ISOTOPIC STUDIES OF CERTAIN UNITS IN THE BARBERTON GRANITE-GREENSTONE TERRANE, SOUTH AFRICA	SPEC. PUBL. GEOL. SOC. S. AFR.	BARTON, J. M. JR.; ROBB, L. J.; ANHAEUSSER, C. R.; VAN NIEROP, D. A.		-26.05	31	0.01	2500	3175	3850	NOT GIVEN	METAMORPHIC	UNKNOWN	UNKNOWN	GNEISS
GNEISS		GEOROC	10.1007/BF00373202	AN ERUPTED MIGMATITE FROM CERRO DEL HOYAZO, SE SPAIN	CONTRIB. MINERAL. PETROL.	ZECK, H. P.		37	-2.4	0.01				XRF	METAMORPHIC	UNKNOWN	UNKNOWN	GNEISS									1.34
GNEISS		GEOROC	10.1007/BF00373202	AN ERUPTED MIGMATITE FROM CERRO DEL HOYAZO, SE SPAIN	CONTRIB. MINERAL. PETROL.	ZECK, H. P.		37	-2.4	0.01				WET	METAMORPHIC	UNKNOWN	UNKNOWN	GNEISS	43.54	1.8	31.64	2.47		8.32		2.74		1.41	3.67	0.3	0.11				2.04
PC-412		GEOROC	10.1093/petrology/egr014	IMPLICATIONS OF THE NUVVUAGITTUQ GREENSTONE BELT FOR THE FORMATION OF EARTHS EARLY CRUST	J. PETROL.	O^NEIL, J.; FRANCIS, D. M.; CARLSON, R. W.		58	-77	0.01				XRF	METAMORPHIC	UNKNOWN	UNKNOWN	GNEISS	55.18	0.384	18.51				10.6987	6.28	2.525	0.56	2.49	0.038	0.269
PC-412		GEOROC	10.1093/petrology/egr014	IMPLICATIONS OF THE NUVVUAGITTUQ GREENSTONE BELT FOR THE FORMATION OF EARTHS EARLY CRUST	J. PETROL.	O^NEIL, J.; FRANCIS, D. M.; CARLSON, R. W.		58	-77	0.01				IGN	METAMORPHIC	UNKNOWN	UNKNOWN	GNEISS														2.29
PC-412		GEOROC	10.1093/petrology/egr014	IMPLICATIONS OF THE NUVVUAGITTUQ GREENSTONE BELT FOR THE FORMATION OF EARTHS EARLY CRUST	J. PETROL.	O^NEIL, J.; FRANCIS, D. M.; CARLSON, R. W.		58	-77	0.01				ICPMS	METAMORPHIC	UNKNOWN	UNKNOWN	GNEISS																			2.49		3.36	0.4	2.03	0.62	0.209	1.44	0.33	2.47	0.58	1.85	0.299
06 FF-2		GEOROC	10.1016/S1342-937X(05)70340-3	RB-SR AND SM-ND GEOCHRONOLOGY OF THE EPPAWALA METAMORPHIC ROCKS AND CARBONATITE, WANNI COMPLEX, SRI LANKA	GONDWANA RES.	WEERAKOON, M. W. T.; MIYAZAKI, T.; SHUTO, K.; KAGAMI, H.		8.167	80.4	0.01	542	1521	2500	TIMS_ID	METAMORPHIC	UNKNOWN	UNKNOWN	GNEISS																							11.75	1.987
06 FF-2		GEOROC	10.1016/S1342-937X(05)70340-3	RB-SR AND SM-ND GEOCHRONOLOGY OF THE EPPAWALA METAMORPHIC ROCKS AND CARBONATITE, WANNI COMPLEX, SRI LANKA	GONDWANA RES.	WEERAKOON, M. W. T.; MIYAZAKI, T.; SHUTO, K.; KAGAMI, H.		8.167	80.4	0.01	542	1521	2500	TIMS	METAMORPHIC	UNKNOWN	UNKNOWN	GNEISS
PC-276		GEOROC	10.1093/petrology/egr014	IMPLICATIONS OF THE NUVVUAGITTUQ GREENSTONE BELT FOR THE FORMATION OF EARTHS EARLY CRUST	J. PETROL.	O^NEIL, J.; FRANCIS, D. M.; CARLSON, R. W.		58	-77	0.01				XRF	METAMORPHIC	UNKNOWN	UNKNOWN	GNEISS	56.42	0.576	17.11				9.15107	4.62	2.3	0.1	4.07	0.108	0.204
PC-276		GEOROC	10.1093/petrology/egr014	IMPLICATIONS OF THE NUVVUAGITTUQ GREENSTONE BELT FOR THE FORMATION OF EARTHS EARLY CRUST	J. PETROL.	O^NEIL, J.; FRANCIS, D. M.; CARLSON, R. W.		58	-77	0.01				IGN	METAMORPHIC	UNKNOWN	UNKNOWN	GNEISS														4.52
PC-276		GEOROC	10.1093/petrology/egr014	IMPLICATIONS OF THE NUVVUAGITTUQ GREENSTONE BELT FOR THE FORMATION OF EARTHS EARLY CRUST	J. PETROL.	O^NEIL, J.; FRANCIS, D. M.; CARLSON, R. W.		58	-77	0.01				ICPMS	METAMORPHIC	UNKNOWN	UNKNOWN	GNEISS																			11.5		22.5	2.67	10.8	2.71	0.848	3.19	0.6	3.84	0.81	2.43	0.366
PC-276		GEOROC	10.1126/SCIENCE.1161925	NEODYMIUM-142 EVIDENCE FOR HADEAN MAFIC CRUST	SCIENCE	O^NEIL, J.; CARLSON, R. W.; FRANCIS, D. M.; STEVENSON, R. K.		58	-77	0.01				TIMS_ID	METAMORPHIC	UNKNOWN	UNKNOWN	GNEISS																							7.55	2
PC-276		GEOROC	10.1126/SCIENCE.1161925	NEODYMIUM-142 EVIDENCE FOR HADEAN MAFIC CRUST	SCIENCE	O^NEIL, J.; CARLSON, R. W.; FRANCIS, D. M.; STEVENSON, R. K.		58	-77	0.01				TIMS	METAMORPHIC	UNKNOWN	UNKNOWN	GNEISS
PC-276		GEOROC	10.1126/SCIENCE.1161925	NEODYMIUM-142 EVIDENCE FOR HADEAN MAFIC CRUST	SCIENCE	O^NEIL, J.; CARLSON, R. W.; FRANCIS, D. M.; STEVENSON, R. K.		58	-77	0.01				NOT GIVEN	METAMORPHIC	UNKNOWN	UNKNOWN	GNEISS
11JD76-2		GEOROC	10.1016/j.gr.2012.12.025	GEOCHEMISTRY, ZIRCON U-PB GEOCHRONOLOGY AND LU-HF ISOTOPES OF METAVOLCANICS FROM EASTERN HEBEI REVEAL NEOARCHEAN SUBDUCTION TECTONICS IN THE NORTH CHINA CRATON	GONDWANA RES.	GUO, RONGRONG; LIU, SHUWEN; SANTOSH, M.; LI, QIUGEN; BAI, XIANG; WANG, WEI		40.3161	118.284	0.01	2500	3175	3850	XRF	METAMORPHIC	UNKNOWN	UNKNOWN	GNEISS	58.2	0.55	14.53		8.25		7.42	6.05	5.91	3.52	2.36	0.2	0.11
11JD76-2		GEOROC	10.1016/j.gr.2012.12.025	GEOCHEMISTRY, ZIRCON U-PB GEOCHRONOLOGY AND LU-HF ISOTOPES OF METAVOLCANICS FROM EASTERN HEBEI REVEAL NEOARCHEAN SUBDUCTION TECTONICS IN THE NORTH CHINA CRATON	GONDWANA RES.	GUO, RONGRONG; LIU, SHUWEN; SANTOSH, M.; LI, QIUGEN; BAI, XIANG; WANG, WEI		40.3161	118.284	0.01	2500	3175	3850	MC_ICPMS	METAMORPHIC	UNKNOWN	UNKNOWN	GNEISS																			14		35	4.73	21	4.05	1.47	3.7	0.48	2.52	0.5	1.35	0.2
11JD76-2		GEOROC	10.1016/j.gr.2012.12.025	GEOCHEMISTRY, ZIRCON U-PB GEOCHRONOLOGY AND LU-HF ISOTOPES OF METAVOLCANICS FROM EASTERN HEBEI REVEAL NEOARCHEAN SUBDUCTION TECTONICS IN THE NORTH CHINA CRATON	GONDWANA RES.	GUO, RONGRONG; LIU, SHUWEN; SANTOSH, M.; LI, QIUGEN; BAI, XIANG; WANG, WEI		40.3161	118.284	0.01	2500	3175	3850	IGN	METAMORPHIC	UNKNOWN	UNKNOWN	GNEISS														0.17
5341		GEOROC	10.1016/0301-9268(94)90099-X	GEOCHEMISTRY OF THE NEOPROTEROZOIC TILEMSI BELT OF IFORAS (MALI, SAHARA): A CRUSTAL SECTION OF AN OCEANIC ISLAND ARC	PREC. RESEARCH	DOSTAL, J.; DUPUY, C.; CABY, R.		20	1	0.01				XRF	METAMORPHIC	UNKNOWN	UNKNOWN	GNEISS
5341		GEOROC	10.1016/0301-9268(94)90099-X	GEOCHEMISTRY OF THE NEOPROTEROZOIC TILEMSI BELT OF IFORAS (MALI, SAHARA): A CRUSTAL SECTION OF AN OCEANIC ISLAND ARC	PREC. RESEARCH	DOSTAL, J.; DUPUY, C.; CABY, R.		20	1	0.01				NOT GIVEN	METAMORPHIC	UNKNOWN	UNKNOWN	GNEISS															1.39	0.24
5341		GEOROC	10.1016/0301-9268(94)90099-X	GEOCHEMISTRY OF THE NEOPROTEROZOIC TILEMSI BELT OF IFORAS (MALI, SAHARA): A CRUSTAL SECTION OF AN OCEANIC ISLAND ARC	PREC. RESEARCH	DOSTAL, J.; DUPUY, C.; CABY, R.		20	1	0.01				ICPMS	METAMORPHIC	UNKNOWN	UNKNOWN	GNEISS																			2.4		6.1			1.35	0.64		0.25
5341		GEOROC	10.1016/0301-9268(94)90099-X	GEOCHEMISTRY OF THE NEOPROTEROZOIC TILEMSI BELT OF IFORAS (MALI, SAHARA): A CRUSTAL SECTION OF AN OCEANIC ISLAND ARC	PREC. RESEARCH	DOSTAL, J.; DUPUY, C.; CABY, R.		20	1	0.01				AAS	METAMORPHIC	UNKNOWN	UNKNOWN	GNEISS	48.62	0.83	17.95		9.67			7.71	10.75	2.14	0.21	0.08	0.15
ID-3		GEOROC	10.1016/S0895-9811(99)00012-7	INCORPORATION OF THE PALEOGENE FORELAND INTO THE NEOGENE PUNA PLATEAU: THE SALAR DE ANTOFALLA AREA, NW ARGENTINA	J. S. AMER. EARTH SCI.	KRAEMER, B.; ADELMANN, D.; ALTEN, M.; SCHNURR, W. B. W.; ERPENSTEIN, K.; KIEFER, E.; VAN DEN BOGAARD, P.; GÖRLER, K.		-25.19	-67.23	0.01				NOT GIVEN	METAMORPHIC	UNKNOWN	UNKNOWN	GNEISS
PC-431		GEOROC	10.1093/petrology/egr014	IMPLICATIONS OF THE NUVVUAGITTUQ GREENSTONE BELT FOR THE FORMATION OF EARTHS EARLY CRUST	J. PETROL.	O^NEIL, J.; FRANCIS, D. M.; CARLSON, R. W.		58	-77	0.01				XRF	METAMORPHIC	UNKNOWN	UNKNOWN	GNEISS	49.74	0.382	17.48				9.30404	10.69	7.29	1.65	0.49	0.035	0.176
PC-431		GEOROC	10.1093/petrology/egr014	IMPLICATIONS OF THE NUVVUAGITTUQ GREENSTONE BELT FOR THE FORMATION OF EARTHS EARLY CRUST	J. PETROL.	O^NEIL, J.; FRANCIS, D. M.; CARLSON, R. W.		58	-77	0.01				IGN	METAMORPHIC	UNKNOWN	UNKNOWN	GNEISS														2.1
PC-431		GEOROC	10.1093/petrology/egr014	IMPLICATIONS OF THE NUVVUAGITTUQ GREENSTONE BELT FOR THE FORMATION OF EARTHS EARLY CRUST	J. PETROL.	O^NEIL, J.; FRANCIS, D. M.; CARLSON, R. W.		58	-77	0.01				ICPMS	METAMORPHIC	UNKNOWN	UNKNOWN	GNEISS																			3.16		4.52	0.53	2.47	0.69	0.268	1.21	0.26	1.89	0.46	1.56	0.258
PC-313		GEOROC	10.1093/petrology/egr014	IMPLICATIONS OF THE NUVVUAGITTUQ GREENSTONE BELT FOR THE FORMATION OF EARTHS EARLY CRUST	J. PETROL.	O^NEIL, J.; FRANCIS, D. M.; CARLSON, R. W.		58	-77	0.01				XRF	METAMORPHIC	UNKNOWN	UNKNOWN	GNEISS	60.7	0.43	18.87				8.97111	3.01	0.43	0.5	3.37	0.024	0.171
PC-313		GEOROC	10.1093/petrology/egr014	IMPLICATIONS OF THE NUVVUAGITTUQ GREENSTONE BELT FOR THE FORMATION OF EARTHS EARLY CRUST	J. PETROL.	O^NEIL, J.; FRANCIS, D. M.; CARLSON, R. W.		58	-77	0.01				IGN	METAMORPHIC	UNKNOWN	UNKNOWN	GNEISS														3
B-78-14C		GEOROC	10.1007/s00710-009-0055-4	GEOCHRONOLOGIC AND SR-ISOTOPIC STUDIES OF CERTAIN UNITS IN THE BARBERTON GRANITE-GREENSTONE TERRANE, SOUTH AFRICA	SPEC. PUBL. GEOL. SOC. S. AFR.	BARTON, J. M. JR.; ROBB, L. J.; ANHAEUSSER, C. R.; VAN NIEROP, D. A.		-26.15	30.5	0.01	2500	3175	3850	NOT GIVEN	METAMORPHIC	UNKNOWN	UNKNOWN	GNEISS
289280		GEOROC	10.2973/odp.proc.sr.129.129.1992	ACCRETION AND EVOLUTION OF AN ARCHEAN HIGH-GRADE GREY GNEISS-AMPHIBOLITE COMPLEX: THE FISKEFJORD AREA, SOUTHERN WEST GREENLAND	BULL. GEOL. GREENLAND SURV.	GARDE, A. A.		64.6611	-51.1894	0.01	2500	3175	3850	XRF	METAMORPHIC	UNKNOWN	UNKNOWN	GNEISS	73.92	0.06	13.98				0.7	0.08	1.32		5.83	0.02	0.01						7		10		7
289280		GEOROC	10.2973/odp.proc.sr.129.129.1992	ACCRETION AND EVOLUTION OF AN ARCHEAN HIGH-GRADE GREY GNEISS-AMPHIBOLITE COMPLEX: THE FISKEFJORD AREA, SOUTHERN WEST GREENLAND	BULL. GEOL. GREENLAND SURV.	GARDE, A. A.		64.6611	-51.1894	0.01	2500	3175	3850	TIT	METAMORPHIC	UNKNOWN	UNKNOWN	GNEISS				0.17		0.55
289280		GEOROC	10.2973/odp.proc.sr.129.129.1992	ACCRETION AND EVOLUTION OF AN ARCHEAN HIGH-GRADE GREY GNEISS-AMPHIBOLITE COMPLEX: THE FISKEFJORD AREA, SOUTHERN WEST GREENLAND	BULL. GEOL. GREENLAND SURV.	GARDE, A. A.		64.6611	-51.1894	0.01	2500	3175	3850	INAA	METAMORPHIC	UNKNOWN	UNKNOWN	GNEISS																			13.1		24		10	1.14	0.43		0.1
289280		GEOROC	10.2973/odp.proc.sr.129.129.1992	ACCRETION AND EVOLUTION OF AN ARCHEAN HIGH-GRADE GREY GNEISS-AMPHIBOLITE COMPLEX: THE FISKEFJORD AREA, SOUTHERN WEST GREENLAND	BULL. GEOL. GREENLAND SURV.	GARDE, A. A.		64.6611	-51.1894	0.01	2500	3175	3850	IGN	METAMORPHIC	UNKNOWN	UNKNOWN	GNEISS														0.06
289280		GEOROC	10.2973/odp.proc.sr.129.129.1992	ACCRETION AND EVOLUTION OF AN ARCHEAN HIGH-GRADE GREY GNEISS-AMPHIBOLITE COMPLEX: THE FISKEFJORD AREA, SOUTHERN WEST GREENLAND	BULL. GEOL. GREENLAND SURV.	GARDE, A. A.		64.6611	-51.1894	0.01	2500	3175	3850	AAS	METAMORPHIC	UNKNOWN	UNKNOWN	GNEISS										2.89
PC-425		GEOROC	10.1093/petrology/egr014	IMPLICATIONS OF THE NUVVUAGITTUQ GREENSTONE BELT FOR THE FORMATION OF EARTHS EARLY CRUST	J. PETROL.	O^NEIL, J.; FRANCIS, D. M.; CARLSON, R. W.		58	-77	0.01				XRF	METAMORPHIC	UNKNOWN	UNKNOWN	GNEISS	52.84	0.614	12.23				10.1049	9.41	4.67	0.85	3.16	0.044	0.115
PC-425		GEOROC	10.1093/petrology/egr014	IMPLICATIONS OF THE NUVVUAGITTUQ GREENSTONE BELT FOR THE FORMATION OF EARTHS EARLY CRUST	J. PETROL.	O^NEIL, J.; FRANCIS, D. M.; CARLSON, R. W.		58	-77	0.01				IGN	METAMORPHIC	UNKNOWN	UNKNOWN	GNEISS														5.03
BEL-08		GEOROC	10.1029/2007GC001925	COMPOSITION AND STRUCTURAL CONTROL OF CRUSTAL DOMAINS IN THE CENTRAL ANDES	GEOCHEMISTRY GEOPHYSICS GEOSYSTEMS	MAMANI, M.; TASSARA, A.; WÖRNER, G.		-18.4833	-69.5167	0.01	251	396.5	542	TIMS	METAMORPHIC	UNKNOWN	UNKNOWN	GNEISS
PC-223		GEOROC	10.1093/petrology/egr014	IMPLICATIONS OF THE NUVVUAGITTUQ GREENSTONE BELT FOR THE FORMATION OF EARTHS EARLY CRUST	J. PETROL.	O^NEIL, J.; FRANCIS, D. M.; CARLSON, R. W.		58	-77	0.01				XRF	METAMORPHIC	UNKNOWN	UNKNOWN	GNEISS	46.3613	0.453	19.3538				9.466	13.7963	0.37	0.48	3.33	0.059	0.151
PC-223		GEOROC	10.1093/petrology/egr014	IMPLICATIONS OF THE NUVVUAGITTUQ GREENSTONE BELT FOR THE FORMATION OF EARTHS EARLY CRUST	J. PETROL.	O^NEIL, J.; FRANCIS, D. M.; CARLSON, R. W.		58	-77	0.01				IGN	METAMORPHIC	UNKNOWN	UNKNOWN	GNEISS														5.96
MAN-7		GEOROC	10.1016/S0024-4937(99)00003-1	SR AND O ISOTOPE CONSTRAINTS ON SOURCE AND CRUSTAL CONTAMINATION IN THE HIGH-K CALC-ALKALINE AND SHOSHONITIC NEOGENE VOLCANIC ROCKS OF SE SPAIN	LITHOS	BENITO GARCIA, R.; LOPEZ RUIZ, J.; CEBRIA, J.-M.; HERTOGEN, J.; DOBLAS, M.; OYARZUN, R.; DEMAIFFE, D.		37.72	-0.8	0.01	5	11	17	XRF	METAMORPHIC	UNKNOWN	UNKNOWN	GNEISS	43.43	1.8	34.82		11.85			2.58	1.44	1.19	0.31	0.15	0.17
MAN-7		GEOROC	10.1016/S0024-4937(99)00003-1	SR AND O ISOTOPE CONSTRAINTS ON SOURCE AND CRUSTAL CONTAMINATION IN THE HIGH-K CALC-ALKALINE AND SHOSHONITIC NEOGENE VOLCANIC ROCKS OF SE SPAIN	LITHOS	BENITO GARCIA, R.; LOPEZ RUIZ, J.; CEBRIA, J.-M.; HERTOGEN, J.; DOBLAS, M.; OYARZUN, R.; DEMAIFFE, D.		37.72	-0.8	0.01	5	11	17	INAA	METAMORPHIC	UNKNOWN	UNKNOWN	GNEISS																			92.1		191		81	15.6	2.17		1.81
MAN-7		GEOROC	10.1016/S0024-4937(99)00003-1	SR AND O ISOTOPE CONSTRAINTS ON SOURCE AND CRUSTAL CONTAMINATION IN THE HIGH-K CALC-ALKALINE AND SHOSHONITIC NEOGENE VOLCANIC ROCKS OF SE SPAIN	LITHOS	BENITO GARCIA, R.; LOPEZ RUIZ, J.; CEBRIA, J.-M.; HERTOGEN, J.; DOBLAS, M.; OYARZUN, R.; DEMAIFFE, D.		37.72	-0.8	0.01	5	11	17	IGN	METAMORPHIC	UNKNOWN	UNKNOWN	GNEISS														1.42
B-77-37G		GEOROC	10.1007/BF00373068	GEOCHRONOLOGIC AND SR-ISOTOPIC STUDIES OF CERTAIN UNITS IN THE BARBERTON GRANITE-GREENSTONE TERRANE, SOUTH AFRICA	SPEC. PUBL. GEOL. SOC. S. AFR.	BARTON, J. M. JR.; ROBB, L. J.; ANHAEUSSER, C. R.; VAN NIEROP, D. A.		-25.78	31.05	0.01	2500	3175	3850	NOT GIVEN	METAMORPHIC	UNKNOWN	UNKNOWN	GNEISS
KMP11		GEOROC	10.1016/j.jvolgeores.2007.10.016	SUBDUCTION INFLUENCE OF PHILIPPINE SEA PLATE ON THE MANTLE BENEATH NORTHERN KYUSHU, SW JAPAN: AN EXAMINATION OF BORON CONTENTS IN BASALTIC ROCKS	J. VOLCANOL. GEOTHERM. RES.	MIYOSHI, M.; FUKUOKA, T.; SANO, T.; HASENAKA, T.		32.5	130.3	0.01				XRF	METAMORPHIC	UNKNOWN	UNKNOWN	GNEISS	45.94	1.78	15.68	11.5				9.22	11.22	1.8	0.54	0.06	0.22
KMP11		GEOROC	10.1016/j.jvolgeores.2007.10.016	SUBDUCTION INFLUENCE OF PHILIPPINE SEA PLATE ON THE MANTLE BENEATH NORTHERN KYUSHU, SW JAPAN: AN EXAMINATION OF BORON CONTENTS IN BASALTIC ROCKS	J. VOLCANOL. GEOTHERM. RES.	MIYOSHI, M.; FUKUOKA, T.; SANO, T.; HASENAKA, T.		32.5	130.3	0.01				PGNAA	METAMORPHIC	UNKNOWN	UNKNOWN	GNEISS																								5.79		6.79
34		GEOROC	10.1007/BF00712980	HE, SR, AND ND ISOTOPIC VARIATIONS IN LAVAS FROM THE JUAN FERNANDEZ ARCHIPELAGO, SE PACIFIC		SCHÜRMANN, H. M. E.		21.92	25	0.01				NOT GIVEN	METAMORPHIC	UNKNOWN	UNKNOWN	GNEISS	73.06	0.04	14.85	0.11		0.41			1.32	4.57	4.87	0.12			0.45	0.35
R623A		GEOROC	10.1130/G31123.1	EVIDENCE FROM ZIRCON U-PB AGE SPECTRA FOR CRUSTAL STRUCTURE AND FELSIC MAGMA GENESIS AT TAUPO VOLCANO, NEW ZEALAND	GEOLOGY	CHARLIER, BRUCE L. A.; WILSON, C. J. N.; MORTIMER, N.		-38.7	176.1	0.01				XRF	METAMORPHIC	UNKNOWN	UNKNOWN	GNEISS	67.07	0.7	15.8		4.93			1.71	2.57	3.93	3.07	0.16	0.07	1
780111		GEOROC	10.1016/0301-9268(84)90050-0	PETROGRAPHY, CHEMISTRY AND ISOTOPIC AGES OF PENINSULAR GNEISS, DHARWAR ACID VOLCANIC ROCKS AND THE CHITRADURGA GRANITE WITH SPECIAL REFERENCE TO THE LATE ARCHAEAN EVOLUTION OF THE KARNATAKA CRATON, SOUTHERN INDIA	PREC. RESEARCH	TAYLOR, P. N.; CHADWICK, B.; MOORBATH, S.; RAMAKRISHNAN, M.; VISWANATHA, M. N.		13.32	75.78	0.01	2500	3175	3850	XRF	METAMORPHIC	UNKNOWN	UNKNOWN	GNEISS
780111		GEOROC	10.1016/0301-9268(84)90050-0	PETROGRAPHY, CHEMISTRY AND ISOTOPIC AGES OF PENINSULAR GNEISS, DHARWAR ACID VOLCANIC ROCKS AND THE CHITRADURGA GRANITE WITH SPECIAL REFERENCE TO THE LATE ARCHAEAN EVOLUTION OF THE KARNATAKA CRATON, SOUTHERN INDIA	PREC. RESEARCH	TAYLOR, P. N.; CHADWICK, B.; MOORBATH, S.; RAMAKRISHNAN, M.; VISWANATHA, M. N.		13.32	75.78	0.01	2500	3175	3850	TIMS	METAMORPHIC	UNKNOWN	UNKNOWN	GNEISS
M490		GEOROC	10.1093/petrology/egi044	GEOCHRONOLOGY AND PETROGENESIS OF THE CRETACEOUS ANTAMPOMBATO-AMBATOVY COMPLEX AND ASSOCIATED DYKE SWARM, MADAGASCAR	J. PETROL.	MELLUSO, L.; MORRA, V.; BROTZU, P.; TOMMASINI, S.; RENNA, M. R.; DUNCAN, R. A.; FRANCIOSI, L.; D^AMELIO, F.		-18.75	48.25	0.01	542	1521	2500	XRF	METAMORPHIC	UNKNOWN	UNKNOWN	GNEISS	71.49	0.35	14.31		3.22			1.36	2.98	3.74	2.32	0.08	0.05
M490		GEOROC	10.1093/petrology/egi044	GEOCHRONOLOGY AND PETROGENESIS OF THE CRETACEOUS ANTAMPOMBATO-AMBATOVY COMPLEX AND ASSOCIATED DYKE SWARM, MADAGASCAR	J. PETROL.	MELLUSO, L.; MORRA, V.; BROTZU, P.; TOMMASINI, S.; RENNA, M. R.; DUNCAN, R. A.; FRANCIOSI, L.; D^AMELIO, F.		-18.75	48.25	0.01	542	1521	2500	IGN	METAMORPHIC	UNKNOWN	UNKNOWN	GNEISS														0.34
BA41		GEOROC	10.1016/0301-9268(95)00072-0	THE OLDEST PART OF THE BARBERTON GRANITOID-GREENSTONE TERRAIN, SOUTH AFRICA: EVIDENCE FOR CRUST FORMATION BETWEEN 3.5 AND 3.7 GA	PREC. RESEARCH	KRÖNER, A.; HEGNER, E.; WENDT, J. I.; BYERLY, G. R.		-26.13	30.98	0.01	3500	3500	3500	TIMS_ID	METAMORPHIC	UNKNOWN	UNKNOWN	GNEISS																							10.51	2.1
BA41		GEOROC	10.1016/0301-9268(95)00072-0	THE OLDEST PART OF THE BARBERTON GRANITOID-GREENSTONE TERRAIN, SOUTH AFRICA: EVIDENCE FOR CRUST FORMATION BETWEEN 3.5 AND 3.7 GA	PREC. RESEARCH	KRÖNER, A.; HEGNER, E.; WENDT, J. I.; BYERLY, G. R.		-26.13	30.98	0.01	3500	3500	3500	TIMS	METAMORPHIC	UNKNOWN	UNKNOWN	GNEISS
BAR39		GEOROC	10.1126/science.210.4475.1245	ORIGIN OF LEAD IN ANDEAN CALC-ALKALINE LAVAS, SOUTHERN PERU	SCIENCE	TILTON, G. R.; BAREIRO, B.		-17.15	-69.85	0.01				TIMS_ID	METAMORPHIC	UNKNOWN	UNKNOWN	GNEISS
BAR39		GEOROC	10.1126/science.210.4475.1245	ORIGIN OF LEAD IN ANDEAN CALC-ALKALINE LAVAS, SOUTHERN PERU	SCIENCE	TILTON, G. R.; BAREIRO, B.		-17.15	-69.85	0.01				TIMS	METAMORPHIC	UNKNOWN	UNKNOWN	GNEISS
G149		GEOROC	10.1007/BF00378107	A 2.5 GA. REWORKED SIALIC CRUST: RB-SR AND ISOTOPIC GEOCHEMISTRY OF LATE ARCHAEAN VOLCANIC AND PLUTONIC ROCKS FROM E. FINLAND	CONTRIB. MINERAL. PETROL.	MARTIN, H.; QUERRE, G.		64.44	29.06	0.01	2430	2500	2570	TIMS_ID	METAMORPHIC	UNKNOWN	UNKNOWN	GNEISS
G149		GEOROC	10.1007/BF00378107	A 2.5 GA. REWORKED SIALIC CRUST: RB-SR AND ISOTOPIC GEOCHEMISTRY OF LATE ARCHAEAN VOLCANIC AND PLUTONIC ROCKS FROM E. FINLAND	CONTRIB. MINERAL. PETROL.	MARTIN, H.; QUERRE, G.		64.44	29.06	0.01	2430	2500	2570	TIMS	METAMORPHIC	UNKNOWN	UNKNOWN	GNEISS
E99224_RESIDUE		GEOROC	10.2113/gsecongeo.99.6.1085	METAL SOURCES IN MINERAL DEPOSITS AND CRUSTAL ROCKS OF ECUADOR (1°N.4°S): A LEAD ISOTOPE SYNTHESIS	ECON. GEOL.	CHIARADIA, M.; FONTBOTE, L.; PALADINES, A.		-1.38	-78.37	0.01	201.6	226.3	251	TIMS	METAMORPHIC	UNKNOWN	UNKNOWN	GNEISS
902		GEOROC	10.1016/j.jvolgeores.2010.08.014	MANTLE SOURCE CHARACTERISTICS AND MELTING MODELS FOR THE EARLY-MIDDLE MIOCENE MAFIC VOLCANISM IN WESTERN ANATOLIA: IMPLICATIONS FOR ENRICHMENT PROCESSES OF MANTLE LITHOSPHERE AND ORIGIN OF K-RICH VOLCANISM IN POST-COLLISIONAL SETTINGS	J. VOLCANOL. GEOTHERM. RES.	ERSOY, Y.; HELVACI, C.; PALMER, M. R.		38.45	27.3	0.01				MC_ICPMS	METAMORPHIC	UNKNOWN	UNKNOWN	GNEISS
780108		GEOROC	10.1016/0301-9268(84)90050-0	PETROGRAPHY, CHEMISTRY AND ISOTOPIC AGES OF PENINSULAR GNEISS, DHARWAR ACID VOLCANIC ROCKS AND THE CHITRADURGA GRANITE WITH SPECIAL REFERENCE TO THE LATE ARCHAEAN EVOLUTION OF THE KARNATAKA CRATON, SOUTHERN INDIA	PREC. RESEARCH	TAYLOR, P. N.; CHADWICK, B.; MOORBATH, S.; RAMAKRISHNAN, M.; VISWANATHA, M. N.		13.32	75.78	0.01	2500	3175	3850	XRF	METAMORPHIC	UNKNOWN	UNKNOWN	GNEISS
780108		GEOROC	10.1016/0301-9268(84)90050-0	PETROGRAPHY, CHEMISTRY AND ISOTOPIC AGES OF PENINSULAR GNEISS, DHARWAR ACID VOLCANIC ROCKS AND THE CHITRADURGA GRANITE WITH SPECIAL REFERENCE TO THE LATE ARCHAEAN EVOLUTION OF THE KARNATAKA CRATON, SOUTHERN INDIA	PREC. RESEARCH	TAYLOR, P. N.; CHADWICK, B.; MOORBATH, S.; RAMAKRISHNAN, M.; VISWANATHA, M. N.		13.32	75.78	0.01	2500	3175	3850	TIMS	METAMORPHIC	UNKNOWN	UNKNOWN	GNEISS
12		GEOROC	10.1130/0016-7606(1989)101<0333:NIATOO>2.3.CO;2	ND ISOTOPES AND THE ORIGIN OF 1.9-1.7 GA PENOKEAN CONTINENTAL CRUST OF THE LAKE SUPERIOR REGION	BULL. GEOL. SOC. AM.	BAROVICH, K. M.; PATCHETT, P. J.; PETERMAN, Z. E.; SIMS, P. K.		45	-88	0.01	2700	2700	2700	TIMS_ID	METAMORPHIC	UNKNOWN	UNKNOWN	GNEISS																							35.12	5.87
12		GEOROC	10.1130/0016-7606(1989)101<0333:NIATOO>2.3.CO;2	ND ISOTOPES AND THE ORIGIN OF 1.9-1.7 GA PENOKEAN CONTINENTAL CRUST OF THE LAKE SUPERIOR REGION	BULL. GEOL. SOC. AM.	BAROVICH, K. M.; PATCHETT, P. J.; PETERMAN, Z. E.; SIMS, P. K.		45	-88	0.01	2700	2700	2700	TIMS	METAMORPHIC	UNKNOWN	UNKNOWN	GNEISS
A930		GEOROC	10.1016/S0301-9268(01)00142-5	THE OS AND ND ISOTOPIC SYSTEMATICS OF C. 2.44 GA AKANVAARA AND KOITELAINEN MAFIC LAYERED INTRUSIONS IN NORTHERN FINLAND	PREC. RESEARCH	HANSKI, E. J.; WALKER, R. J.; HUHMA, H.; SUOMINEN, I.		67.81	26.86	0.01	2500	3175	3850	TIMS_N	METAMORPHIC	UNKNOWN	UNKNOWN	GNEISS
A930		GEOROC	10.1016/S0301-9268(01)00142-5	THE OS AND ND ISOTOPIC SYSTEMATICS OF C. 2.44 GA AKANVAARA AND KOITELAINEN MAFIC LAYERED INTRUSIONS IN NORTHERN FINLAND	PREC. RESEARCH	HANSKI, E. J.; WALKER, R. J.; HUHMA, H.; SUOMINEN, I.		67.81	26.86	0.01	2500	3175	3850	TIMS	METAMORPHIC	UNKNOWN	UNKNOWN	GNEISS																							6.87	1.47
FJ0109		GEOROC	10.1016/j.gr.2006.10.016	SHRIMP U-PB ZIRCON GEOCHRONOLOGY AND GEOCHEMISTRY OF METAVOLCANIC AND METASEDIMENTARY ROCKS IN NORTHWESTERN FUJIAN, CATHAYSIA BLOCK, CHINA: TECTONIC IMPLICATIONS AND THE NEED TO REDEFINE LITHOSTRATIGRAPHIC UNITS	GONDWANA RES.	WAN, YUSHENG; LIU, DUNYI; XU, MEIHUI; ZHUANG, JIANMIN; SONG, BIAO; SHI, YU-RUO; DU, LILIN		27.3	117.3	0.01	542	1521	2500	XRF	METAMORPHIC	UNKNOWN	UNKNOWN	GNEISS	69.19	0.66	13.3	1.01				2.27	1.34	1.9	3.42	0.17	0.08
FJ0109		GEOROC	10.1016/j.gr.2006.10.016	SHRIMP U-PB ZIRCON GEOCHRONOLOGY AND GEOCHEMISTRY OF METAVOLCANIC AND METASEDIMENTARY ROCKS IN NORTHWESTERN FUJIAN, CATHAYSIA BLOCK, CHINA: TECTONIC IMPLICATIONS AND THE NEED TO REDEFINE LITHOSTRATIGRAPHIC UNITS	GONDWANA RES.	WAN, YUSHENG; LIU, DUNYI; XU, MEIHUI; ZHUANG, JIANMIN; SONG, BIAO; SHI, YU-RUO; DU, LILIN		27.3	117.3	0.01	542	1521	2500	WET	METAMORPHIC	UNKNOWN	UNKNOWN	GNEISS						3.86											2.02
FJ0109		GEOROC	10.1016/j.gr.2006.10.016	SHRIMP U-PB ZIRCON GEOCHRONOLOGY AND GEOCHEMISTRY OF METAVOLCANIC AND METASEDIMENTARY ROCKS IN NORTHWESTERN FUJIAN, CATHAYSIA BLOCK, CHINA: TECTONIC IMPLICATIONS AND THE NEED TO REDEFINE LITHOSTRATIGRAPHIC UNITS	GONDWANA RES.	WAN, YUSHENG; LIU, DUNYI; XU, MEIHUI; ZHUANG, JIANMIN; SONG, BIAO; SHI, YU-RUO; DU, LILIN		27.3	117.3	0.01	542	1521	2500	MC_ICPMS_ID	METAMORPHIC	UNKNOWN	UNKNOWN	GNEISS																							32.647	6.179
FJ0109		GEOROC	10.1016/j.gr.2006.10.016	SHRIMP U-PB ZIRCON GEOCHRONOLOGY AND GEOCHEMISTRY OF METAVOLCANIC AND METASEDIMENTARY ROCKS IN NORTHWESTERN FUJIAN, CATHAYSIA BLOCK, CHINA: TECTONIC IMPLICATIONS AND THE NEED TO REDEFINE LITHOSTRATIGRAPHIC UNITS	GONDWANA RES.	WAN, YUSHENG; LIU, DUNYI; XU, MEIHUI; ZHUANG, JIANMIN; SONG, BIAO; SHI, YU-RUO; DU, LILIN		27.3	117.3	0.01	542	1521	2500	MC_ICPMS	METAMORPHIC	UNKNOWN	UNKNOWN	GNEISS
FJ0109		GEOROC	10.1016/j.gr.2006.10.016	SHRIMP U-PB ZIRCON GEOCHRONOLOGY AND GEOCHEMISTRY OF METAVOLCANIC AND METASEDIMENTARY ROCKS IN NORTHWESTERN FUJIAN, CATHAYSIA BLOCK, CHINA: TECTONIC IMPLICATIONS AND THE NEED TO REDEFINE LITHOSTRATIGRAPHIC UNITS	GONDWANA RES.	WAN, YUSHENG; LIU, DUNYI; XU, MEIHUI; ZHUANG, JIANMIN; SONG, BIAO; SHI, YU-RUO; DU, LILIN		27.3	117.3	0.01	542	1521	2500	ICPMS	METAMORPHIC	UNKNOWN	UNKNOWN	GNEISS																			44.99		76.58	8.04	32.05	6.33	1.19	5.38	0.86	5.02	1.06	3.03	0.45
510846		GEOROC	10.1016/j.gr.2011.11.006	REMNANTS OF ARC-RELATED MESOARCHAEAN OCEANIC CRUST IN THE TARTOQ GROUP OF SW GREENLAND	GONDWANA RES.	SZILAS, K.; VAN HINSBERG, V.; KISTERS, A. F. M.; HOFFMANN, J. E.; WINDLEY, B. F.; KOKFELT, T. F.; SCHERSTEN, A.; FREI, R.; ROSING, M. T.; MÜNKER, C.		61.5313	-48.5926	0.01				IGN	METAMORPHIC	UNKNOWN	UNKNOWN	GNEISS														1.5
510846		GEOROC	10.1016/j.gr.2011.11.006	REMNANTS OF ARC-RELATED MESOARCHAEAN OCEANIC CRUST IN THE TARTOQ GROUP OF SW GREENLAND	GONDWANA RES.	SZILAS, K.; VAN HINSBERG, V.; KISTERS, A. F. M.; HOFFMANN, J. E.; WINDLEY, B. F.; KOKFELT, T. F.; SCHERSTEN, A.; FREI, R.; ROSING, M. T.; MÜNKER, C.		61.5313	-48.5926	0.01				ICPMS	METAMORPHIC	UNKNOWN	UNKNOWN	GNEISS																			27.5		56	5.93	19.5	3.11	0.72	2.38	0.38	2.07	0.38	1.09	0.17
510846		GEOROC	10.1016/j.gr.2011.11.006	REMNANTS OF ARC-RELATED MESOARCHAEAN OCEANIC CRUST IN THE TARTOQ GROUP OF SW GREENLAND	GONDWANA RES.	SZILAS, K.; VAN HINSBERG, V.; KISTERS, A. F. M.; HOFFMANN, J. E.; WINDLEY, B. F.; KOKFELT, T. F.; SCHERSTEN, A.; FREI, R.; ROSING, M. T.; MÜNKER, C.		61.5313	-48.5926	0.01				ICPAES	METAMORPHIC	UNKNOWN	UNKNOWN	GNEISS	68.3	0.43	15.18		3.46			1.41	3.14	3.83	2.42	0.12	0.05					0.004
DH-4-66		GEOROC	10.1016/0016-7037(86)90215-2	MANTLE HETEROGENEITY AND CRUSTAL RECYCLING IN ARCHEAN GRANITE-GREENSTONE BELTS: EVIDENCE FROM ND ISOTOPES AND TRACE ELEMENTS IN THE RAINY LAKE AREA, SUPERIOR PROVINCE, ONTARIO, CANADA	GEOCHIM. COSMOCHIM. ACTA	SHIREY, S. B.; HANSON, G. N.		48.75	-93	0.01				XRF	METAMORPHIC	UNKNOWN	UNKNOWN	GNEISS	72.9	0.44	11.2	1.28		5.62		1.68	1.86	2.42	2.01	0.06	0.1
DH-4-66		GEOROC	10.1016/0016-7037(86)90215-2	MANTLE HETEROGENEITY AND CRUSTAL RECYCLING IN ARCHEAN GRANITE-GREENSTONE BELTS: EVIDENCE FROM ND ISOTOPES AND TRACE ELEMENTS IN THE RAINY LAKE AREA, SUPERIOR PROVINCE, ONTARIO, CANADA	GEOCHIM. COSMOCHIM. ACTA	SHIREY, S. B.; HANSON, G. N.		48.75	-93	0.01				TIMS_ID	METAMORPHIC	UNKNOWN	UNKNOWN	GNEISS																					109		53.7	12.6	2.48	12.8		15.5		10.5
DH-4-66		GEOROC	10.1016/0016-7037(86)90215-2	MANTLE HETEROGENEITY AND CRUSTAL RECYCLING IN ARCHEAN GRANITE-GREENSTONE BELTS: EVIDENCE FROM ND ISOTOPES AND TRACE ELEMENTS IN THE RAINY LAKE AREA, SUPERIOR PROVINCE, ONTARIO, CANADA	GEOCHIM. COSMOCHIM. ACTA	SHIREY, S. B.; HANSON, G. N.		48.75	-93	0.01				TIMS	METAMORPHIC	UNKNOWN	UNKNOWN	GNEISS
DH-4-66		GEOROC	10.1016/0016-7037(86)90215-2	MANTLE HETEROGENEITY AND CRUSTAL RECYCLING IN ARCHEAN GRANITE-GREENSTONE BELTS: EVIDENCE FROM ND ISOTOPES AND TRACE ELEMENTS IN THE RAINY LAKE AREA, SUPERIOR PROVINCE, ONTARIO, CANADA	GEOCHIM. COSMOCHIM. ACTA	SHIREY, S. B.; HANSON, G. N.		48.75	-93	0.01				NOT GIVEN	METAMORPHIC	UNKNOWN	UNKNOWN	GNEISS															0.61	0.03
510771		GEOROC	10.1016/j.gr.2011.11.006	REMNANTS OF ARC-RELATED MESOARCHAEAN OCEANIC CRUST IN THE TARTOQ GROUP OF SW GREENLAND	GONDWANA RES.	SZILAS, K.; VAN HINSBERG, V.; KISTERS, A. F. M.; HOFFMANN, J. E.; WINDLEY, B. F.; KOKFELT, T. F.; SCHERSTEN, A.; FREI, R.; ROSING, M. T.; MÜNKER, C.		61.6424	-48.307	0.01				IGN	METAMORPHIC	UNKNOWN	UNKNOWN	GNEISS														2.2
510771		GEOROC	10.1016/j.gr.2011.11.006	REMNANTS OF ARC-RELATED MESOARCHAEAN OCEANIC CRUST IN THE TARTOQ GROUP OF SW GREENLAND	GONDWANA RES.	SZILAS, K.; VAN HINSBERG, V.; KISTERS, A. F. M.; HOFFMANN, J. E.; WINDLEY, B. F.; KOKFELT, T. F.; SCHERSTEN, A.; FREI, R.; ROSING, M. T.; MÜNKER, C.		61.6424	-48.307	0.01				ICPMS	METAMORPHIC	UNKNOWN	UNKNOWN	GNEISS																			15.5		32	3.64	13.9	2.53	1.22	2.49	0.37	1.8	0.41	1.19	0.19
510771		GEOROC	10.1016/j.gr.2011.11.006	REMNANTS OF ARC-RELATED MESOARCHAEAN OCEANIC CRUST IN THE TARTOQ GROUP OF SW GREENLAND	GONDWANA RES.	SZILAS, K.; VAN HINSBERG, V.; KISTERS, A. F. M.; HOFFMANN, J. E.; WINDLEY, B. F.; KOKFELT, T. F.; SCHERSTEN, A.; FREI, R.; ROSING, M. T.; MÜNKER, C.		61.6424	-48.307	0.01				ICPAES	METAMORPHIC	UNKNOWN	UNKNOWN	GNEISS	61.83	0.77	16.47		5.31			1.99	5.78	4.49	0.74	0.18	0.07					0.003
903		GEOROC	10.1016/j.lithos.2005.12.015	MESOPROTEROZOIC RIFT-RELATED ALKALINE MAGMATISM AT ELCHURU, PRAKASAM ALKALINE PROVINCE, SE INDIA	LITHOS	UPADHYAY, D.; RAITH, M. M.; MEZGER, K.; HAMMERSCHMIDT, K.		16.08	79.92	0.01				TIMS	METAMORPHIC	UNKNOWN	UNKNOWN	GNEISS
G91-4		GEOROC	10.2113/gsecongeo.90.5.1217	RARE EARTH ELEMENT GEOCHEMISTRY OF THE METAMORPHOSED VOLCANOGENIC MASSIVE SULFIDE DEPOSITS OF THE MANITOUWADGE MINING CAMP, SUPERIOR PROVINCE, CANADA: A POTENTIAL EXPLORATION TOOL?	ECON. GEOL.	SCHANDL, E. S.; GORTON, M. P.; WASTENEYS, H A.		49.2	-85.83	0.01	2500	3175	3850	XRF	METAMORPHIC	UNKNOWN	UNKNOWN	GNEISS	64.3	0.63	15.7		6			3.1	2.82	3.97	2.16	0.15	0.11
G91-4		GEOROC	10.2113/gsecongeo.90.5.1217	RARE EARTH ELEMENT GEOCHEMISTRY OF THE METAMORPHOSED VOLCANOGENIC MASSIVE SULFIDE DEPOSITS OF THE MANITOUWADGE MINING CAMP, SUPERIOR PROVINCE, CANADA: A POTENTIAL EXPLORATION TOOL?	ECON. GEOL.	SCHANDL, E. S.; GORTON, M. P.; WASTENEYS, H A.		49.2	-85.83	0.01	2500	3175	3850	IGN	METAMORPHIC	UNKNOWN	UNKNOWN	GNEISS														0.9
G193		GEOROC	10.1007/BF00378107	A 2.5 GA. REWORKED SIALIC CRUST: RB-SR AND ISOTOPIC GEOCHEMISTRY OF LATE ARCHAEAN VOLCANIC AND PLUTONIC ROCKS FROM E. FINLAND	CONTRIB. MINERAL. PETROL.	MARTIN, H.; QUERRE, G.		64.44	29.06	0.01	2430	2500	2570	TIMS_ID	METAMORPHIC	UNKNOWN	UNKNOWN	GNEISS
G193		GEOROC	10.1007/BF00378107	A 2.5 GA. REWORKED SIALIC CRUST: RB-SR AND ISOTOPIC GEOCHEMISTRY OF LATE ARCHAEAN VOLCANIC AND PLUTONIC ROCKS FROM E. FINLAND	CONTRIB. MINERAL. PETROL.	MARTIN, H.; QUERRE, G.		64.44	29.06	0.01	2430	2500	2570	TIMS	METAMORPHIC	UNKNOWN	UNKNOWN	GNEISS
VH-97-76		GEOROC	10.1016/S0012-821X(00)00266-1	THE 72 MA GEOCHEMICAL EVOLUTION OF THE MADEIRA HOTSPOT (EASTERN NORTH ATLANTIC): RECYCLING OF PALEOZOIC (<500 MA) OCEANIC LITHOSPHERE	EARTH PLANET. SCI. LETT.	GELDMACHER, J.; HOERNLE, K. A.	CRUISE 97	36.7689	-11.0981	0.01				XRF	METAMORPHIC	UNKNOWN	UNKNOWN	GNEISS	72.84	0.12	14.65		1.27			0.15	2.86	2.63	4.63	0.07	0.01
VH-97-76		GEOROC	10.1016/S0012-821X(00)00266-1	THE 72 MA GEOCHEMICAL EVOLUTION OF THE MADEIRA HOTSPOT (EASTERN NORTH ATLANTIC): RECYCLING OF PALEOZOIC (<500 MA) OCEANIC LITHOSPHERE	EARTH PLANET. SCI. LETT.	GELDMACHER, J.; HOERNLE, K. A.	CRUISE 97	36.7689	-11.0981	0.01				TIMS	METAMORPHIC	UNKNOWN	UNKNOWN	GNEISS
VH-97-76		GEOROC	10.1016/S0012-821X(00)00266-1	THE 72 MA GEOCHEMICAL EVOLUTION OF THE MADEIRA HOTSPOT (EASTERN NORTH ATLANTIC): RECYCLING OF PALEOZOIC (<500 MA) OCEANIC LITHOSPHERE	EARTH PLANET. SCI. LETT.	GELDMACHER, J.; HOERNLE, K. A.	CRUISE 97	36.7689	-11.0981	0.01				IR	METAMORPHIC	UNKNOWN	UNKNOWN	GNEISS																	0.46
VH-97-76		GEOROC	10.1016/S0012-821X(00)00266-1	THE 72 MA GEOCHEMICAL EVOLUTION OF THE MADEIRA HOTSPOT (EASTERN NORTH ATLANTIC): RECYCLING OF PALEOZOIC (<500 MA) OCEANIC LITHOSPHERE	EARTH PLANET. SCI. LETT.	GELDMACHER, J.; HOERNLE, K. A.	CRUISE 97	36.7689	-11.0981	0.01				ICPMS	METAMORPHIC	UNKNOWN	UNKNOWN	GNEISS																			19.2		27.4	2.63	8.36	0.99	0.81	0.61	0.06	0.28	0.05	0.14	0.02
GNEISS		GEOROC	10.1016/0024-4937(87)90010-7	THE NATURE OF THE LITHOSPHERE BENEATH THE SARDINIAN CONTINENTAL BLOCK: MANTLE AND DEEP CRUSTAL INCLUSIONS IN MAFIC ALKALINE LAVAS	LITHOS	RUTTER, E. H.		40.4	8.65	0.01				XRF	METAMORPHIC	UNKNOWN	UNKNOWN	GNEISS	42.16	0.05	20.09		10.53			17.09	11.26	0.05		0.05	0.14
GNEISS		GEOROC	10.1016/0024-4937(87)90010-7	THE NATURE OF THE LITHOSPHERE BENEATH THE SARDINIAN CONTINENTAL BLOCK: MANTLE AND DEEP CRUSTAL INCLUSIONS IN MAFIC ALKALINE LAVAS	LITHOS	RUTTER, E. H.		40.4	8.65	0.01				IGN	METAMORPHIC	UNKNOWN	UNKNOWN	GNEISS														0.13
B-79-16F		GEOROC	10.1016/S0012-821X(99)00267-8	GEOCHRONOLOGIC AND SR-ISOTOPIC STUDIES OF CERTAIN UNITS IN THE BARBERTON GRANITE-GREENSTONE TERRANE, SOUTH AFRICA	SPEC. PUBL. GEOL. SOC. S. AFR.	BARTON, J. M. JR.; ROBB, L. J.; ANHAEUSSER, C. R.; VAN NIEROP, D. A.		-25.6	31	0.01	2500	3175	3850	NOT GIVEN	METAMORPHIC	UNKNOWN	UNKNOWN	GNEISS
510657		GEOROC	10.1016/j.gr.2011.11.006	REMNANTS OF ARC-RELATED MESOARCHAEAN OCEANIC CRUST IN THE TARTOQ GROUP OF SW GREENLAND	GONDWANA RES.	SZILAS, K.; VAN HINSBERG, V.; KISTERS, A. F. M.; HOFFMANN, J. E.; WINDLEY, B. F.; KOKFELT, T. F.; SCHERSTEN, A.; FREI, R.; ROSING, M. T.; MÜNKER, C.		61.4256	-48.8738	0.01				IGN	METAMORPHIC	UNKNOWN	UNKNOWN	GNEISS														0.4
510657		GEOROC	10.1016/j.gr.2011.11.006	REMNANTS OF ARC-RELATED MESOARCHAEAN OCEANIC CRUST IN THE TARTOQ GROUP OF SW GREENLAND	GONDWANA RES.	SZILAS, K.; VAN HINSBERG, V.; KISTERS, A. F. M.; HOFFMANN, J. E.; WINDLEY, B. F.; KOKFELT, T. F.; SCHERSTEN, A.; FREI, R.; ROSING, M. T.; MÜNKER, C.		61.4256	-48.8738	0.01				ICPMS	METAMORPHIC	UNKNOWN	UNKNOWN	GNEISS																			4.6		16.1	1.24	4.2	0.73	0.29	0.47	0.06	0.27	0.05	0.11	0.02
510657		GEOROC	10.1016/j.gr.2011.11.006	REMNANTS OF ARC-RELATED MESOARCHAEAN OCEANIC CRUST IN THE TARTOQ GROUP OF SW GREENLAND	GONDWANA RES.	SZILAS, K.; VAN HINSBERG, V.; KISTERS, A. F. M.; HOFFMANN, J. E.; WINDLEY, B. F.; KOKFELT, T. F.; SCHERSTEN, A.; FREI, R.; ROSING, M. T.; MÜNKER, C.		61.4256	-48.8738	0.01				ICPAES	METAMORPHIC	UNKNOWN	UNKNOWN	GNEISS	73.16	0.11	15.18		0.89			0.3	1.6	4.86	3.29	0.02	0.01					0
283672		GEOROC	10.1093/petrology/egm010	ACCRETION AND EVOLUTION OF AN ARCHEAN HIGH-GRADE GREY GNEISS-AMPHIBOLITE COMPLEX: THE FISKEFJORD AREA, SOUTHERN WEST GREENLAND	BULL. GEOL. GREENLAND SURV.	GARDE, A. A.		64.5634	-51.6558	0.01	2500	3175	3850	XRF	METAMORPHIC	UNKNOWN	UNKNOWN	GNEISS	56.29	1.01	19.35				7.1	2.26	7.11		0.75	0.24	0.12						14		28		16
283672		GEOROC	10.1093/petrology/egm010	ACCRETION AND EVOLUTION OF AN ARCHEAN HIGH-GRADE GREY GNEISS-AMPHIBOLITE COMPLEX: THE FISKEFJORD AREA, SOUTHERN WEST GREENLAND	BULL. GEOL. GREENLAND SURV.	GARDE, A. A.		64.5634	-51.6558	0.01	2500	3175	3850	TIT	METAMORPHIC	UNKNOWN	UNKNOWN	GNEISS				3.69		3.78
283672		GEOROC	10.1093/petrology/egm010	ACCRETION AND EVOLUTION OF AN ARCHEAN HIGH-GRADE GREY GNEISS-AMPHIBOLITE COMPLEX: THE FISKEFJORD AREA, SOUTHERN WEST GREENLAND	BULL. GEOL. GREENLAND SURV.	GARDE, A. A.		64.5634	-51.6558	0.01	2500	3175	3850	INAA	METAMORPHIC	UNKNOWN	UNKNOWN	GNEISS																			12.2		23		12	2.77	1.09		0.4
283672		GEOROC	10.1093/petrology/egm010	ACCRETION AND EVOLUTION OF AN ARCHEAN HIGH-GRADE GREY GNEISS-AMPHIBOLITE COMPLEX: THE FISKEFJORD AREA, SOUTHERN WEST GREENLAND	BULL. GEOL. GREENLAND SURV.	GARDE, A. A.		64.5634	-51.6558	0.01	2500	3175	3850	IGN	METAMORPHIC	UNKNOWN	UNKNOWN	GNEISS														0.33
283672		GEOROC	10.1093/petrology/egm010	ACCRETION AND EVOLUTION OF AN ARCHEAN HIGH-GRADE GREY GNEISS-AMPHIBOLITE COMPLEX: THE FISKEFJORD AREA, SOUTHERN WEST GREENLAND	BULL. GEOL. GREENLAND SURV.	GARDE, A. A.		64.5634	-51.6558	0.01	2500	3175	3850	AAS	METAMORPHIC	UNKNOWN	UNKNOWN	GNEISS										4.93
BM2		GEOROC	10.1093/petrology/22.2.155	ISOTOPE GEOCHEMISTRY OF TERTIARY IGNEOUS ROCKS FROM THE ISLE OF SKYE, N.W. SCOTLAND	J. PETROL.	DICKIN, A. P.		57.2333	-6.1333	0.01				XRF	METAMORPHIC	UNKNOWN	UNKNOWN	GNEISS
BM2		GEOROC	10.1093/petrology/22.2.155	ISOTOPE GEOCHEMISTRY OF TERTIARY IGNEOUS ROCKS FROM THE ISLE OF SKYE, N.W. SCOTLAND	J. PETROL.	DICKIN, A. P.		57.2333	-6.1333	0.01				TIMS	METAMORPHIC	UNKNOWN	UNKNOWN	GNEISS
BM2		GEOROC	10.1016/S0012-821X(68)80044-5	LEAD ISOTOPE STUDIES ON IGNEOUS ROCKS FROM THE ISLE OF SKYE, NORTHWEST SCOTLAND	EARTH PLANET. SCI. LETT.	MOORBATH, S.; WELKE, H. J.		57.2333	-6.1333	0.01				TIMS	METAMORPHIC	UNKNOWN	UNKNOWN	GNEISS
BM2		GEOROC	10.1016/S0012-821X(68)80044-5	LEAD ISOTOPE STUDIES ON IGNEOUS ROCKS FROM THE ISLE OF SKYE, NORTHWEST SCOTLAND	EARTH PLANET. SCI. LETT.	MOORBATH, S.; WELKE, H. J.		57.2333	-6.1333	0.01				DNAA	METAMORPHIC	UNKNOWN	UNKNOWN	GNEISS
B46		GEOROC	10.1130/B25681.1	GNEISSOSE CARBONATITE IN THE BULL^S RUN COMPLEX, NATAL	S. AFR. J. GEOL.	SCOGINGS, A. J.; FORSTER, I. F.		-27	30	0.01	542	1521	2500	NOT GIVEN	METAMORPHIC	UNKNOWN	UNKNOWN	GNEISS	2.57	0.23	1.08	0.63		3.16		0.26	48.53	0.11	0.49	2.75	0.9						361.37		718.45	76.29	269.3	41.63	12.82	32.19		22.47	4.5	12.67
G-7		GEOROC	10.1144/GSL.SP.1996.112.01.15	MESOPROTEROZOIC ANOROGENIC MAGMATISM IN SOUTHERN NORWAY	SPEC. PUBL. GEOL. SOC. LONDON	MENUGE, J. F.; BREWER, T. S.		59.5	8.6	0.01				TIMS_ID	METAMORPHIC	UNKNOWN	UNKNOWN	GNEISS																							37.28	7.614
G-7		GEOROC	10.1144/GSL.SP.1996.112.01.15	MESOPROTEROZOIC ANOROGENIC MAGMATISM IN SOUTHERN NORWAY	SPEC. PUBL. GEOL. SOC. LONDON	MENUGE, J. F.; BREWER, T. S.		59.5	8.6	0.01				TIMS	METAMORPHIC	UNKNOWN	UNKNOWN	GNEISS
KS37		GEOROC	10.1016/S1342-937X(05)70998-9	LATE MESOPROTEROZOIC ARC AND BACK-ARC VOLCANISM IN THE HEIMEFRONTFJELLA (EAST ANTARCTICA) AND IMPLICATIONS FOR THE PALAEOGEOGRAPHY AT THE SOUTHEASTERN MARGIN OF THE KAAPVAAL-GRUNEHOGNA CRATON	GONDWANA RES.	BAUER, W.; JACOBS, J.; FANNING, C. M.; SCHMIDT, R.		-74.5	-10	0.01				XRF	METAMORPHIC	UNKNOWN	UNKNOWN	GNEISS	60.18	1.02	16.25		6.74			2.69	4.73	3.42	2.88	0.35	0.12
KS37		GEOROC	10.1016/S1342-937X(05)70998-9	LATE MESOPROTEROZOIC ARC AND BACK-ARC VOLCANISM IN THE HEIMEFRONTFJELLA (EAST ANTARCTICA) AND IMPLICATIONS FOR THE PALAEOGEOGRAPHY AT THE SOUTHEASTERN MARGIN OF THE KAAPVAAL-GRUNEHOGNA CRATON	GONDWANA RES.	BAUER, W.; JACOBS, J.; FANNING, C. M.; SCHMIDT, R.		-74.5	-10	0.01				IGN	METAMORPHIC	UNKNOWN	UNKNOWN	GNEISS														0.81
165542		GEOROC	10.1029/JB094iB06p07749	PB, SR AND ND ISOTOPIC CHARACTERISTICS OF TERTIARY RED SEA RIFT VOLCANICS FROM THE CENTRAL SAUDI ARABIAN COASTAL PLAIN	J. GEOPHYS. RES.	HEGNER, E.; PALLISTER, J. S.		20.15	40.27	0.01	800	800	800	TIMS	METAMORPHIC	UNKNOWN	UNKNOWN	GNEISS
165542		GEOROC	10.1029/JB094iB06p07749	PB, SR AND ND ISOTOPIC CHARACTERISTICS OF TERTIARY RED SEA RIFT VOLCANICS FROM THE CENTRAL SAUDI ARABIAN COASTAL PLAIN	J. GEOPHYS. RES.	HEGNER, E.; PALLISTER, J. S.		20.15	40.27	0.01	800	800	800	NOT GIVEN	METAMORPHIC	UNKNOWN	UNKNOWN	GNEISS																							15.76	2.83
G91-58		GEOROC	10.1016/0301-9268(95)00066-6	THE ITSAQ GNEISS COMPLEX OF SOUTHERN WEST GREENLAND; THE WORLD^S MOST EXTENSIVE RECORD OF EARLY CRUSTAL EVOLUTION (3900-3600 MA)	PREC. RESEARCH	NUTMAN, A. P.; MCGREGOR, V. R.; FRIEND, C. R. L.; BENNETT, V. C.; KINNY, P. D.		64.1153	-51.4375	0.01				XRF	METAMORPHIC	UNKNOWN	UNKNOWN	GNEISS	75.07	0.36	11.62	2.74				0.52	0.91	2.24	4.6	0.04	0.04
G91-58		GEOROC	10.1016/0301-9268(95)00066-6	THE ITSAQ GNEISS COMPLEX OF SOUTHERN WEST GREENLAND; THE WORLD^S MOST EXTENSIVE RECORD OF EARLY CRUSTAL EVOLUTION (3900-3600 MA)	PREC. RESEARCH	NUTMAN, A. P.; MCGREGOR, V. R.; FRIEND, C. R. L.; BENNETT, V. C.; KINNY, P. D.		64.1153	-51.4375	0.01				SHRIMP	METAMORPHIC	UNKNOWN	UNKNOWN	GNEISS
G91-58		GEOROC	10.1016/0301-9268(95)00066-6	THE ITSAQ GNEISS COMPLEX OF SOUTHERN WEST GREENLAND; THE WORLD^S MOST EXTENSIVE RECORD OF EARLY CRUSTAL EVOLUTION (3900-3600 MA)	PREC. RESEARCH	NUTMAN, A. P.; MCGREGOR, V. R.; FRIEND, C. R. L.; BENNETT, V. C.; KINNY, P. D.		64.1153	-51.4375	0.01				IGN	METAMORPHIC	UNKNOWN	UNKNOWN	GNEISS														0.71
PC-445		GEOROC	10.1093/petrology/egr014	IMPLICATIONS OF THE NUVVUAGITTUQ GREENSTONE BELT FOR THE FORMATION OF EARTHS EARLY CRUST	J. PETROL.	O^NEIL, J.; FRANCIS, D. M.; CARLSON, R. W.		58	-77	0.01				XRF	METAMORPHIC	UNKNOWN	UNKNOWN	GNEISS	49.38	0.327	15.15				10.2128	15.06	2.61	0.63	0.96	0.04	0.21
PC-445		GEOROC	10.1093/petrology/egr014	IMPLICATIONS OF THE NUVVUAGITTUQ GREENSTONE BELT FOR THE FORMATION OF EARTHS EARLY CRUST	J. PETROL.	O^NEIL, J.; FRANCIS, D. M.; CARLSON, R. W.		58	-77	0.01				IGN	METAMORPHIC	UNKNOWN	UNKNOWN	GNEISS														4.93
B-77-41H		GEOROC	10.1007/BF00286934	GEOCHRONOLOGIC AND SR-ISOTOPIC STUDIES OF CERTAIN UNITS IN THE BARBERTON GRANITE-GREENSTONE TERRANE, SOUTH AFRICA	SPEC. PUBL. GEOL. SOC. S. AFR.	BARTON, J. M. JR.; ROBB, L. J.; ANHAEUSSER, C. R.; VAN NIEROP, D. A.		-26.1	31	0.01	2500	3175	3850	NOT GIVEN	METAMORPHIC	UNKNOWN	UNKNOWN	GNEISS
157205		GEOROC	10.1093/petrology/egp048	PETROLOGY OF THE PALEOCENE PICRITES AND FLOOD BASALTS ON DISKO AND NUUSSUAQ, WEST GREENLAND	J. PETROL.	LARSEN, L. M.; PEDERSEN, A. K.		69.2655	-53.5465	0.01	542	1521	2500	XRF	METAMORPHIC	UNKNOWN	UNKNOWN	GNEISS	71.73	0.37	13.62	1.09				0.99	3.22		1.25	0.08	0.04						35.8		71.9		30.8
157205		GEOROC	10.1093/petrology/egp048	PETROLOGY OF THE PALEOCENE PICRITES AND FLOOD BASALTS ON DISKO AND NUUSSUAQ, WEST GREENLAND	J. PETROL.	LARSEN, L. M.; PEDERSEN, A. K.		69.2655	-53.5465	0.01	542	1521	2500	TIT	METAMORPHIC	UNKNOWN	UNKNOWN	GNEISS						2.28
157205		GEOROC	10.1093/petrology/egp048	PETROLOGY OF THE PALEOCENE PICRITES AND FLOOD BASALTS ON DISKO AND NUUSSUAQ, WEST GREENLAND	J. PETROL.	LARSEN, L. M.; PEDERSEN, A. K.		69.2655	-53.5465	0.01	542	1521	2500	TIMS	METAMORPHIC	UNKNOWN	UNKNOWN	GNEISS
157205		GEOROC	10.1093/petrology/egp048	PETROLOGY OF THE PALEOCENE PICRITES AND FLOOD BASALTS ON DISKO AND NUUSSUAQ, WEST GREENLAND	J. PETROL.	LARSEN, L. M.; PEDERSEN, A. K.		69.2655	-53.5465	0.01	542	1521	2500	IGN	METAMORPHIC	UNKNOWN	UNKNOWN	GNEISS														0.44
157205		GEOROC	10.1093/petrology/egp048	PETROLOGY OF THE PALEOCENE PICRITES AND FLOOD BASALTS ON DISKO AND NUUSSUAQ, WEST GREENLAND	J. PETROL.	LARSEN, L. M.; PEDERSEN, A. K.		69.2655	-53.5465	0.01	542	1521	2500	ICPMS	METAMORPHIC	UNKNOWN	UNKNOWN	GNEISS																			30.3592		61.6236	7.56249	27.1151	4.78775	0.907246	4.38827	0.578734	2.89571	0.512181	1.24657	0.151829
157205		GEOROC	10.1093/petrology/egp048	PETROLOGY OF THE PALEOCENE PICRITES AND FLOOD BASALTS ON DISKO AND NUUSSUAQ, WEST GREENLAND	J. PETROL.	LARSEN, L. M.; PEDERSEN, A. K.		69.2655	-53.5465	0.01	542	1521	2500	AAS	METAMORPHIC	UNKNOWN	UNKNOWN	GNEISS										3.9
EC-307		GEOROC	10.1139/e95-136	ND-SR ISOTOPIC CONSTRAINTS ON THE INTERACTIONS OF THE INTERMONTANE SUPERTERRANE WITH THE WESTERN EDGE OF NORTH AMERICA IN THE SOUTHERN CANADIAN CORDILLERA	CAN. J. EARTH SCI.	GHOSH, D.K.		48.5583	-118.325	0.01	65.5	105.5	145.5	XRF	METAMORPHIC	UNKNOWN	UNKNOWN	GNEISS																							37.55	6.55
EC-307		GEOROC	10.1139/e95-136	ND-SR ISOTOPIC CONSTRAINTS ON THE INTERACTIONS OF THE INTERMONTANE SUPERTERRANE WITH THE WESTERN EDGE OF NORTH AMERICA IN THE SOUTHERN CANADIAN CORDILLERA	CAN. J. EARTH SCI.	GHOSH, D.K.		48.5583	-118.325	0.01	65.5	105.5	145.5	TIMS	METAMORPHIC	UNKNOWN	UNKNOWN	GNEISS
B-79-13K		GEOROC	10.1134/S0869591113010050	GEOCHRONOLOGIC AND SR-ISOTOPIC STUDIES OF CERTAIN UNITS IN THE BARBERTON GRANITE-GREENSTONE TERRANE, SOUTH AFRICA	SPEC. PUBL. GEOL. SOC. S. AFR.	BARTON, J. M. JR.; ROBB, L. J.; ANHAEUSSER, C. R.; VAN NIEROP, D. A.		-26.1	31	0.01	2500	3175	3850	NOT GIVEN	METAMORPHIC	UNKNOWN	UNKNOWN	GNEISS
ET7		GEOROC	10.1130/0016-7606(1970)81	THE GEOLOGY OF THE SCHAPENBURG GREENSTONE REMNANT AND SURROUNDING ARCHEAN GRANITIC TERRANE SOUTH OF BADPLAAS, EASTERN TRANSVAAL	SPEC. PUBL. GEOL. SOC. S. AFR.	ANHAEUSSER, C. R.		-26.1	30.5	0.01	2500	3175	3850	NOT GIVEN	METAMORPHIC	UNKNOWN	UNKNOWN	GNEISS	74.19	0.2	13.22		1.35			0.11	0.93	4.19	4.5	0.07	0.03	0.59
B229		GEOROC	10.1016/0025-3227(70)90022-8	GNEISSOSE CARBONATITE IN THE BULL^S RUN COMPLEX, NATAL	S. AFR. J. GEOL.	SCOGINGS, A. J.; FORSTER, I. F.		-27	30	0.01	542	1521	2500	NOT GIVEN	METAMORPHIC	UNKNOWN	UNKNOWN	GNEISS	21.68	0.74	8.75	1.01		5.03		1.06	31.34	0.87	3.14	6.28	0.28						309.27		637.19	71.8	271.6	40.99	12.86	30.6		17.82	3.36	8.69
PC-65		GEOROC	10.1093/petrology/egr014	IMPLICATIONS OF THE NUVVUAGITTUQ GREENSTONE BELT FOR THE FORMATION OF EARTHS EARLY CRUST	J. PETROL.	O^NEIL, J.; FRANCIS, D. M.; CARLSON, R. W.		58	-77	0.01				XRF	METAMORPHIC	UNKNOWN	UNKNOWN	GNEISS	49.88	0.377	16.68				9.91591	9.25	8.69	1.02	0.72	0.035	0.25
PC-65		GEOROC	10.1093/petrology/egr014	IMPLICATIONS OF THE NUVVUAGITTUQ GREENSTONE BELT FOR THE FORMATION OF EARTHS EARLY CRUST	J. PETROL.	O^NEIL, J.; FRANCIS, D. M.; CARLSON, R. W.		58	-77	0.01				IGN	METAMORPHIC	UNKNOWN	UNKNOWN	GNEISS														2.35
LL27-1		GEOROC	10.1080/00288306.2004.9515046	THE 2.2-2.1 GA MAGMATIC EVENT AND ITS TECTONIC IMPLICATION IN THE LÜLIANG MOUNTAINS, NORTH CHINA CRATON	ACTA PETROL. SINICA (YANSHI-XUEBAO)	DU, LILIN; YANG, CHONGHUI; REN, LIUDONG; SONG, HUIXIA; GENG, YUANSHENG; WAN, YUSHENG		38	111	0.01	542	1521	2500	NOT GIVEN	METAMORPHIC	UNKNOWN	UNKNOWN	GNEISS	54.63	0.84	15.84	2.41		5.37		5.17	7.44	3.01	2.95	0.4	0.16	0.56	0.82				34.2		73.2	8.19	32.1	5.54	1.4	5.35	0.68	4.12	0.82	2.32	0.31
M327		GEOROC	10.1029/2010GC003064	PETROCHEMICAL STUDIES OF THE RYOKE GRANITIC ROCKS FROM THE RIVER KOSHIBU DISTRICT, CENTRAL JAPAN	J. FAC. SCI., SHINSHU UNIV.	YAMADA, T.		35.5	138	0.01				SPECC	METAMORPHIC	UNKNOWN	UNKNOWN	GNEISS
M327		GEOROC	10.1029/2010GC003064	PETROCHEMICAL STUDIES OF THE RYOKE GRANITIC ROCKS FROM THE RIVER KOSHIBU DISTRICT, CENTRAL JAPAN	J. FAC. SCI., SHINSHU UNIV.	YAMADA, T.		35.5	138	0.01				NOT GIVEN	METAMORPHIC	UNKNOWN	UNKNOWN	GNEISS	69.11	0.27	14.92	0.73		2.32		0.74	2.63	4.66	2.7	0.2					1.09
MLG-17		GEOROC	10.1086/314337	U-PB GEOCHRONOLOGY AND ISOTOPE GEOCHEMISTRY OF THE ARCHEAN AND PROTEROZOIC ROCKS OF NORTH-CENTRAL MADAGASCAR	J. GEOL.	TUCKER, R. D.; ASHWAL, L. D.; HANDKE, M. J.; LE GRANGE, M.; HAMILTON, M. A.; RAMBELOSON, R. A.		-17	47	0.01	542	1521	2500	TIMS_ID	METAMORPHIC	UNKNOWN	UNKNOWN	GNEISS																							34.55	8.012
MLG-17		GEOROC	10.1086/314337	U-PB GEOCHRONOLOGY AND ISOTOPE GEOCHEMISTRY OF THE ARCHEAN AND PROTEROZOIC ROCKS OF NORTH-CENTRAL MADAGASCAR	J. GEOL.	TUCKER, R. D.; ASHWAL, L. D.; HANDKE, M. J.; LE GRANGE, M.; HAMILTON, M. A.; RAMBELOSON, R. A.		-17	47	0.01	542	1521	2500	TIMS	METAMORPHIC	UNKNOWN	UNKNOWN	GNEISS
CKB71-64		GEOROC	10.1007/BF00370870	STRONTIUM AND OXYGEN ISOTOPE EVIDENCE RELATING TO THE PETROGENESIS OF THE KANGERDLUGSSUAQ ALKALINE INTRUSION, EAST GREENLAND	CONTRIB. MINERAL. PETROL.	PANKHURST, R. J.; BECKINSALE, R. D.; BROOKS, C. K.		68	-32	0.01	542	1521	2500	XRF	METAMORPHIC	UNKNOWN	UNKNOWN	GNEISS
CKB71-64		GEOROC	10.1007/BF00370870	STRONTIUM AND OXYGEN ISOTOPE EVIDENCE RELATING TO THE PETROGENESIS OF THE KANGERDLUGSSUAQ ALKALINE INTRUSION, EAST GREENLAND	CONTRIB. MINERAL. PETROL.	PANKHURST, R. J.; BECKINSALE, R. D.; BROOKS, C. K.		68	-32	0.01	542	1521	2500	TIMS	METAMORPHIC	UNKNOWN	UNKNOWN	GNEISS
91-1		GEOROC	10.1007/BF00376962	PETROLOGY AND GEOCHEMISTRY OF GRANULITE XENOLITHS FROM CENTRAL HOGGAR (ALGERIA) - IMPLICATIONS FOR THE LOWER CRUST	CONTRIB. MINERAL. PETROL.	LEYRELOUP, A. F.; BODINIER, J. L.; DUPUY, C.; DOSTAL, J.		24.8	5.9	0.01				WET	METAMORPHIC	UNKNOWN	UNKNOWN	GNEISS	64.2	1.04	15.22		9.35			3.15	1.85	1.52	1.17	0.15	0.15	1.44
91-1		GEOROC	10.1007/BF00376962	PETROLOGY AND GEOCHEMISTRY OF GRANULITE XENOLITHS FROM CENTRAL HOGGAR (ALGERIA) - IMPLICATIONS FOR THE LOWER CRUST	CONTRIB. MINERAL. PETROL.	LEYRELOUP, A. F.; BODINIER, J. L.; DUPUY, C.; DOSTAL, J.		24.8	5.9	0.01				INAA	METAMORPHIC	UNKNOWN	UNKNOWN	GNEISS																			27.7		48.8			2.8	1.23		0.56
91-1		GEOROC	10.1007/BF00376962	PETROLOGY AND GEOCHEMISTRY OF GRANULITE XENOLITHS FROM CENTRAL HOGGAR (ALGERIA) - IMPLICATIONS FOR THE LOWER CRUST	CONTRIB. MINERAL. PETROL.	LEYRELOUP, A. F.; BODINIER, J. L.; DUPUY, C.; DOSTAL, J.		24.8	5.9	0.01				AAS	METAMORPHIC	UNKNOWN	UNKNOWN	GNEISS
B-79-15I		GEOROC	10.2973/odp.proc.sr.115.141.1990	GEOCHRONOLOGIC AND SR-ISOTOPIC STUDIES OF CERTAIN UNITS IN THE BARBERTON GRANITE-GREENSTONE TERRANE, SOUTH AFRICA	SPEC. PUBL. GEOL. SOC. S. AFR.	BARTON, J. M. JR.; ROBB, L. J.; ANHAEUSSER, C. R.; VAN NIEROP, D. A.		-25.8	31	0.01	2500	3175	3850	NOT GIVEN	METAMORPHIC	UNKNOWN	UNKNOWN	GNEISS
493104		GEOROC	10.1016/j.precamres.2010.10.003	FIELD AND GEOCHEMICAL CHARACTERISTICS OF MESOARCHEAN TO NEOARCHEAN VOLCANIC ROCKS IN THE STOROE GREENSTONE BELT, SW GREENLAND: EVIDENCE FOR ACCRETION OF INTRA-OCEANIC VOLCANIC ARCS	PREC. RESEARCH	ORDONEZ-CALDERON, J. C.; POLAT, A.; FRYER, B. J.; GAGNON, J. E.		64.4076	-51.0948	0.01	2800	2930	3060	IGN	METAMORPHIC	UNKNOWN	UNKNOWN	GNEISS														0.61
493104		GEOROC	10.1016/j.precamres.2010.10.003	FIELD AND GEOCHEMICAL CHARACTERISTICS OF MESOARCHEAN TO NEOARCHEAN VOLCANIC ROCKS IN THE STOROE GREENSTONE BELT, SW GREENLAND: EVIDENCE FOR ACCRETION OF INTRA-OCEANIC VOLCANIC ARCS	PREC. RESEARCH	ORDONEZ-CALDERON, J. C.; POLAT, A.; FRYER, B. J.; GAGNON, J. E.		64.4076	-51.0948	0.01	2800	2930	3060	ICPOES	METAMORPHIC	UNKNOWN	UNKNOWN	GNEISS	82.53	0.45	8.6		4.74			1.19	0.85	0.69	0.84	0.04	0.07
493104		GEOROC	10.1016/j.precamres.2010.10.003	FIELD AND GEOCHEMICAL CHARACTERISTICS OF MESOARCHEAN TO NEOARCHEAN VOLCANIC ROCKS IN THE STOROE GREENSTONE BELT, SW GREENLAND: EVIDENCE FOR ACCRETION OF INTRA-OCEANIC VOLCANIC ARCS	PREC. RESEARCH	ORDONEZ-CALDERON, J. C.; POLAT, A.; FRYER, B. J.; GAGNON, J. E.		64.4076	-51.0948	0.01	2800	2930	3060	ICPMS	METAMORPHIC	UNKNOWN	UNKNOWN	GNEISS																			11.55		23.82	2.84	11.27	2.2	0.56	2.21	0.32	2.03	0.44	1.27	0.18
74HK86		GEOROC	10.1007/s00445-006-0056-7	CENOZOIC GRANITOIDS OF CENTRAL HOKKAIDO, JAPAN - AN EXAMPLE OF PLUTONISM ALONG COLLISION BELT	BULL. GEOL. SURV. JAPAN	ISHIHARA, S.; TERASHIMA, S.		42	143	0.01	0	32.75	65.5	WET/AAS	METAMORPHIC	UNKNOWN	UNKNOWN	GNEISS									3.28	3.41	2.66
B-78-15F		GEOROC	10.1111/j.1440-1738.2005.00461.x	GEOCHRONOLOGIC AND SR-ISOTOPIC STUDIES OF CERTAIN UNITS IN THE BARBERTON GRANITE-GREENSTONE TERRANE, SOUTH AFRICA	SPEC. PUBL. GEOL. SOC. S. AFR.	BARTON, J. M. JR.; ROBB, L. J.; ANHAEUSSER, C. R.; VAN NIEROP, D. A.		-26.15	30.5	0.01	2500	3175	3850	NOT GIVEN	METAMORPHIC	UNKNOWN	UNKNOWN	GNEISS
498294		GEOROC	10.1016/j.lithos.2008.11.005	GEOCHEMISTRY AND GEODYNAMIC ORIGIN OF THE MESOARCHEAN UJARASSUIT AND IVISAARTOQ GREENSTONE BELTS, SW GREENLAND	LITHOS	ORDONEZ-CALDERON, J. C.; POLAT, A.; FRYER, B. J.; APPEL, P. W. U.; VAN GOOL, J. A. M.; DILEK, Y.; GAGNON, J. E.		64.7266	-49.9841	0.01	3080	3080	3080	IGN	METAMORPHIC	UNKNOWN	UNKNOWN	GNEISS														0.85
498294		GEOROC	10.1016/j.lithos.2008.11.005	GEOCHEMISTRY AND GEODYNAMIC ORIGIN OF THE MESOARCHEAN UJARASSUIT AND IVISAARTOQ GREENSTONE BELTS, SW GREENLAND	LITHOS	ORDONEZ-CALDERON, J. C.; POLAT, A.; FRYER, B. J.; APPEL, P. W. U.; VAN GOOL, J. A. M.; DILEK, Y.; GAGNON, J. E.		64.7266	-49.9841	0.01	3080	3080	3080	ICPOES	METAMORPHIC	UNKNOWN	UNKNOWN	GNEISS	76.3	0.32	11.42		5.12			0.75	0.9	3.29	1.79	0.04	0.05
498294		GEOROC	10.1016/j.lithos.2008.11.005	GEOCHEMISTRY AND GEODYNAMIC ORIGIN OF THE MESOARCHEAN UJARASSUIT AND IVISAARTOQ GREENSTONE BELTS, SW GREENLAND	LITHOS	ORDONEZ-CALDERON, J. C.; POLAT, A.; FRYER, B. J.; APPEL, P. W. U.; VAN GOOL, J. A. M.; DILEK, Y.; GAGNON, J. E.		64.7266	-49.9841	0.01	3080	3080	3080	ICPMS	METAMORPHIC	UNKNOWN	UNKNOWN	GNEISS																			56.96		130.78	19.03	86.48	24.3	3.33	27.38	4.13	23.35	4.37	12.37	1.83
278754		GEOROC	10.1016/S0024-4937(02)00109-3	ACCRETION AND EVOLUTION OF AN ARCHEAN HIGH-GRADE GREY GNEISS-AMPHIBOLITE COMPLEX: THE FISKEFJORD AREA, SOUTHERN WEST GREENLAND	BULL. GEOL. GREENLAND SURV.	GARDE, A. A.		64.9503	-51.2451	0.01	2500	3175	3850	XRF	METAMORPHIC	UNKNOWN	UNKNOWN	GNEISS	62.19	0.71	17.03				5.56	2.34	5.66		0.74	0.2	0.08						13		37		23
278754		GEOROC	10.1016/S0024-4937(02)00109-3	ACCRETION AND EVOLUTION OF AN ARCHEAN HIGH-GRADE GREY GNEISS-AMPHIBOLITE COMPLEX: THE FISKEFJORD AREA, SOUTHERN WEST GREENLAND	BULL. GEOL. GREENLAND SURV.	GARDE, A. A.		64.9503	-51.2451	0.01	2500	3175	3850	TIT	METAMORPHIC	UNKNOWN	UNKNOWN	GNEISS				1.74		3.99
278754		GEOROC	10.1016/S0024-4937(02)00109-3	ACCRETION AND EVOLUTION OF AN ARCHEAN HIGH-GRADE GREY GNEISS-AMPHIBOLITE COMPLEX: THE FISKEFJORD AREA, SOUTHERN WEST GREENLAND	BULL. GEOL. GREENLAND SURV.	GARDE, A. A.		64.9503	-51.2451	0.01	2500	3175	3850	INAA	METAMORPHIC	UNKNOWN	UNKNOWN	GNEISS																			17		33		16	3.1	0.98		0.4
278754		GEOROC	10.1016/S0024-4937(02)00109-3	ACCRETION AND EVOLUTION OF AN ARCHEAN HIGH-GRADE GREY GNEISS-AMPHIBOLITE COMPLEX: THE FISKEFJORD AREA, SOUTHERN WEST GREENLAND	BULL. GEOL. GREENLAND SURV.	GARDE, A. A.		64.9503	-51.2451	0.01	2500	3175	3850	IGN	METAMORPHIC	UNKNOWN	UNKNOWN	GNEISS														0.33
278754		GEOROC	10.1016/S0024-4937(02)00109-3	ACCRETION AND EVOLUTION OF AN ARCHEAN HIGH-GRADE GREY GNEISS-AMPHIBOLITE COMPLEX: THE FISKEFJORD AREA, SOUTHERN WEST GREENLAND	BULL. GEOL. GREENLAND SURV.	GARDE, A. A.		64.9503	-51.2451	0.01	2500	3175	3850	AAS	METAMORPHIC	UNKNOWN	UNKNOWN	GNEISS										4.78
278754		GEOROC	10.1016/S0024-4937(02)00109-3	ACCRETION AND EVOLUTION OF AN ARCHEAN HIGH-GRADE GREY GNEISS-AMPHIBOLITE COMPLEX: THE FISKEFJORD AREA, SOUTHERN WEST GREENLAND	BULL. GEOL. GREENLAND SURV.	GARDE, A. A.		64.9503	-51.2451	0.01	2500	3175	3850	XRF	METAMORPHIC	UNKNOWN	UNKNOWN	GNEISS
278754		GEOROC	10.1016/S0024-4937(02)00109-3	ACCRETION AND EVOLUTION OF AN ARCHEAN HIGH-GRADE GREY GNEISS-AMPHIBOLITE COMPLEX: THE FISKEFJORD AREA, SOUTHERN WEST GREENLAND	BULL. GEOL. GREENLAND SURV.	GARDE, A. A.		64.9503	-51.2451	0.01	2500	3175	3850	TIMS	METAMORPHIC	UNKNOWN	UNKNOWN	GNEISS
CJ55		GEOROC	10.1016/S0024-4937(98)00015-2	PETROGENESIS OF THE PALEOPROTEROZOIC BASALT-ANDESITE-RHYOLITE DYKE ASSOCIATION IN THE CARAJÁS REGION, AMAZONIAN CRATON	LITHOS	RIVALENTI, G.; MAZZUCCHELLI, M.; GIRARDI, V. A. V.; CAVAZZINI, G.; FINATTI, C.; BARBIERI, MARIA A.; TEIXEIRA, W.		-6.63	-51.98	0.01				XRF	METAMORPHIC	UNKNOWN	UNKNOWN	GNEISS	53.14	0.24	21.15	0.59		4.4		5.01	11.48	3.38	0.46	0.01	0.13						9		10		8
PC-267		GEOROC	10.1093/petrology/egr014	IMPLICATIONS OF THE NUVVUAGITTUQ GREENSTONE BELT FOR THE FORMATION OF EARTHS EARLY CRUST	J. PETROL.	O^NEIL, J.; FRANCIS, D. M.; CARLSON, R. W.		58	-77	0.01				XRF	METAMORPHIC	UNKNOWN	UNKNOWN	GNEISS	52.37	0.587	15.96				12.4624	8.11	3.09	1.79	1.64	0.097	0.311
PC-267		GEOROC	10.1093/petrology/egr014	IMPLICATIONS OF THE NUVVUAGITTUQ GREENSTONE BELT FOR THE FORMATION OF EARTHS EARLY CRUST	J. PETROL.	O^NEIL, J.; FRANCIS, D. M.; CARLSON, R. W.		58	-77	0.01				IGN	METAMORPHIC	UNKNOWN	UNKNOWN	GNEISS														3.41
PC-267		GEOROC	10.1093/petrology/egr014	IMPLICATIONS OF THE NUVVUAGITTUQ GREENSTONE BELT FOR THE FORMATION OF EARTHS EARLY CRUST	J. PETROL.	O^NEIL, J.; FRANCIS, D. M.; CARLSON, R. W.		58	-77	0.01				ICPMS	METAMORPHIC	UNKNOWN	UNKNOWN	GNEISS																			16.3		31.3	3.75	14.8	3.38	0.697	3.73	0.72	4.85	1.07	3.33	0.519
PC-267		GEOROC	10.1126/SCIENCE.1161925	NEODYMIUM-142 EVIDENCE FOR HADEAN MAFIC CRUST	SCIENCE	O^NEIL, J.; CARLSON, R. W.; FRANCIS, D. M.; STEVENSON, R. K.		58	-77	0.01				TIMS_ID	METAMORPHIC	UNKNOWN	UNKNOWN	GNEISS																							9.5	2.29
PC-267		GEOROC	10.1126/SCIENCE.1161925	NEODYMIUM-142 EVIDENCE FOR HADEAN MAFIC CRUST	SCIENCE	O^NEIL, J.; CARLSON, R. W.; FRANCIS, D. M.; STEVENSON, R. K.		58	-77	0.01				TIMS	METAMORPHIC	UNKNOWN	UNKNOWN	GNEISS
PC-267		GEOROC	10.1126/SCIENCE.1161925	NEODYMIUM-142 EVIDENCE FOR HADEAN MAFIC CRUST	SCIENCE	O^NEIL, J.; CARLSON, R. W.; FRANCIS, D. M.; STEVENSON, R. K.		58	-77	0.01				NOT GIVEN	METAMORPHIC	UNKNOWN	UNKNOWN	GNEISS
SNANKR-1		GEOROC	10.1016/S0012-821X(97)00091-5	GEOCHRONOLOGY AND ND ISOTOPIC DATA OF GRENVILLE-AGE ROCKS IN THE COLOMBIAN ANDES: NEW CONSTRAINTS FOR LATE PROTEROZOIC-EARLY PALEOZOIC PALEOCONTINENTAL RECONSTRUCTIONS OF THE AMERICAS	EARTH PLANET. SCI. LETT.	RESTREPO-PACE, P. A.; RUIZ, J.; GEHRELS, G. E.; COSCA, M. A.		2	-75	0.01				NOT GIVEN	METAMORPHIC	UNKNOWN	UNKNOWN	GNEISS																							78.97	14.93
32		GEOROC	10.1086/501223	RADIOMETRIC AGES OF METAMORPHIC AND ASSOCIATED IGNEOUS ROCKS OF THE SLAVONIAN MOUNTAINS IN THE SOUTHERN PART OF THE PANNONIAN BASIN, YUGOSLAVIA	ACTA GEOL.	PAMIC, J.; LANPHERE, M. A.; MCKEE, E. H.		45.62	17.55	0.01	251	396.5	542	TIMS	METAMORPHIC	UNKNOWN	UNKNOWN	GNEISS
32		GEOROC	10.1086/501223	RADIOMETRIC AGES OF METAMORPHIC AND ASSOCIATED IGNEOUS ROCKS OF THE SLAVONIAN MOUNTAINS IN THE SOUTHERN PART OF THE PANNONIAN BASIN, YUGOSLAVIA	ACTA GEOL.	PAMIC, J.; LANPHERE, M. A.; MCKEE, E. H.		45.62	17.55	0.01	251	396.5	542	TIMS	METAMORPHIC	UNKNOWN	UNKNOWN	GNEISS
32		GEOROC	10.1086/501223	RADIOMETRIC AGES OF METAMORPHIC AND ASSOCIATED IGNEOUS ROCKS OF THE SLAVONIAN MOUNTAINS IN THE SOUTHERN PART OF THE PANNONIAN BASIN, YUGOSLAVIA	ACTA GEOL.	PAMIC, J.; LANPHERE, M. A.; MCKEE, E. H.		45.62	17.55	0.01	251	396.5	542	MS_ID	METAMORPHIC	UNKNOWN	UNKNOWN	GNEISS
B-79-13J		GEOROC	10.1016/j.jvolgeores.2012.03.004	GEOCHRONOLOGIC AND SR-ISOTOPIC STUDIES OF CERTAIN UNITS IN THE BARBERTON GRANITE-GREENSTONE TERRANE, SOUTH AFRICA	SPEC. PUBL. GEOL. SOC. S. AFR.	BARTON, J. M. JR.; ROBB, L. J.; ANHAEUSSER, C. R.; VAN NIEROP, D. A.		-26.1	31	0.01	2500	3175	3850	NOT GIVEN	METAMORPHIC	UNKNOWN	UNKNOWN	GNEISS
XAYA-40		GEOROC	10.1016/j.tecto.2008.01.010	ORDOVICIAN-EARLIEST SILURIAN RIFT THOLEIITES IN THE ACATLÁN COMPLEX, SOUTHERN MEXICO: EVIDENCE OF RIFTING ON THE SOUTHERN MARGIN OF THE RHEIC OCEAN	TECTONOPHYSICS	KEPPIE, J. D.; DOSTAL, J.; MILLER, B. V.; RAMOS-ARIAS, M. A.; MORALES-GAMEZ, M.; NANCE, R. D.; MURPHY, J. B.; ORTEGA-RIVERA, A.; LEE, J. W. K.; COOPER, P.		18.25	-98	0.01	251	396.5	542	XRF	METAMORPHIC	UNKNOWN	UNKNOWN	GNEISS	48.49	0.55	14.92		8.75			10.68	8.91	0.73	3.28	0.11	0.15
XAYA-40		GEOROC	10.1016/j.tecto.2008.01.010	ORDOVICIAN-EARLIEST SILURIAN RIFT THOLEIITES IN THE ACATLÁN COMPLEX, SOUTHERN MEXICO: EVIDENCE OF RIFTING ON THE SOUTHERN MARGIN OF THE RHEIC OCEAN	TECTONOPHYSICS	KEPPIE, J. D.; DOSTAL, J.; MILLER, B. V.; RAMOS-ARIAS, M. A.; MORALES-GAMEZ, M.; NANCE, R. D.; MURPHY, J. B.; ORTEGA-RIVERA, A.; LEE, J. W. K.; COOPER, P.		18.25	-98	0.01	251	396.5	542	IGN	METAMORPHIC	UNKNOWN	UNKNOWN	GNEISS														2.65
XAYA-40		GEOROC	10.1016/j.tecto.2008.01.010	ORDOVICIAN-EARLIEST SILURIAN RIFT THOLEIITES IN THE ACATLÁN COMPLEX, SOUTHERN MEXICO: EVIDENCE OF RIFTING ON THE SOUTHERN MARGIN OF THE RHEIC OCEAN	TECTONOPHYSICS	KEPPIE, J. D.; DOSTAL, J.; MILLER, B. V.; RAMOS-ARIAS, M. A.; MORALES-GAMEZ, M.; NANCE, R. D.; MURPHY, J. B.; ORTEGA-RIVERA, A.; LEE, J. W. K.; COOPER, P.		18.25	-98	0.01	251	396.5	542	ICPMS	METAMORPHIC	UNKNOWN	UNKNOWN	GNEISS																			19		48.2	5.82	22	4.3	1.08	3.64	0.537	3.14	0.644	1.85	0.266
15		GEOROC	10.1130/0016-7606(1989)101<0333:NIATOO>2.3.CO;2	ND ISOTOPES AND THE ORIGIN OF 1.9-1.7 GA PENOKEAN CONTINENTAL CRUST OF THE LAKE SUPERIOR REGION	BULL. GEOL. SOC. AM.	BAROVICH, K. M.; PATCHETT, P. J.; PETERMAN, Z. E.; SIMS, P. K.		45	-88	0.01	1880	1880	1880	TIMS_ID	METAMORPHIC	UNKNOWN	UNKNOWN	GNEISS																							27.78	4.2
15		GEOROC	10.1130/0016-7606(1989)101<0333:NIATOO>2.3.CO;2	ND ISOTOPES AND THE ORIGIN OF 1.9-1.7 GA PENOKEAN CONTINENTAL CRUST OF THE LAKE SUPERIOR REGION	BULL. GEOL. SOC. AM.	BAROVICH, K. M.; PATCHETT, P. J.; PETERMAN, Z. E.; SIMS, P. K.		45	-88	0.01	1880	1880	1880	TIMS	METAMORPHIC	UNKNOWN	UNKNOWN	GNEISS
IN05012		GEOROC	10.1016/j.epsl.2006.11.034	PRE-3750 MA SUPRACRUSTAL ROCKS FROM THE NUVVUAGITTUQ SUPRACRUSTAL BELT, NORTHERN QUEBEC	EARTH PLANET. SCI. LETT.	CATES, N. L.; MOJZSIS, S. J.		58	-77	0.01				XRF	METAMORPHIC	UNKNOWN	UNKNOWN	GNEISS	67.93	0.3	13.144		6.42096			3.38041	2.2734	2.00335	1.67244	0.1	0.09
IN05012		GEOROC	10.1016/j.epsl.2006.11.034	PRE-3750 MA SUPRACRUSTAL ROCKS FROM THE NUVVUAGITTUQ SUPRACRUSTAL BELT, NORTHERN QUEBEC	EARTH PLANET. SCI. LETT.	CATES, N. L.; MOJZSIS, S. J.		58	-77	0.01				ICPMS	METAMORPHIC	UNKNOWN	UNKNOWN	GNEISS																			20.7307		38.5903	4.21355	15.801	2.69448	0.677705	2.00033	0.239484	1.18519	0.208004	0.535896	0.0674964
26		GEOROC	10.1130/0016-7606(1989)101<0333:NIATOO>2.3.CO;2	ND ISOTOPES AND THE ORIGIN OF 1.9-1.7 GA PENOKEAN CONTINENTAL CRUST OF THE LAKE SUPERIOR REGION	BULL. GEOL. SOC. AM.	BAROVICH, K. M.; PATCHETT, P. J.; PETERMAN, Z. E.; SIMS, P. K.		45	-88	0.01	1850	1850	1850	TIMS_ID	METAMORPHIC	UNKNOWN	UNKNOWN	GNEISS																							36.54	6.36
26		GEOROC	10.1130/0016-7606(1989)101<0333:NIATOO>2.3.CO;2	ND ISOTOPES AND THE ORIGIN OF 1.9-1.7 GA PENOKEAN CONTINENTAL CRUST OF THE LAKE SUPERIOR REGION	BULL. GEOL. SOC. AM.	BAROVICH, K. M.; PATCHETT, P. J.; PETERMAN, Z. E.; SIMS, P. K.		45	-88	0.01	1850	1850	1850	TIMS	METAMORPHIC	UNKNOWN	UNKNOWN	GNEISS
FJ0115		GEOROC	10.1016/j.gr.2006.10.016	SHRIMP U-PB ZIRCON GEOCHRONOLOGY AND GEOCHEMISTRY OF METAVOLCANIC AND METASEDIMENTARY ROCKS IN NORTHWESTERN FUJIAN, CATHAYSIA BLOCK, CHINA: TECTONIC IMPLICATIONS AND THE NEED TO REDEFINE LITHOSTRATIGRAPHIC UNITS	GONDWANA RES.	WAN, YUSHENG; LIU, DUNYI; XU, MEIHUI; ZHUANG, JIANMIN; SONG, BIAO; SHI, YU-RUO; DU, LILIN		27.3	117.3	0.01	542	1521	2500	XRF	METAMORPHIC	UNKNOWN	UNKNOWN	GNEISS	67.6	0.66	13.62	0.65				2.17	1.92	3.28	2.26	0.16	0.12
FJ0115		GEOROC	10.1016/j.gr.2006.10.016	SHRIMP U-PB ZIRCON GEOCHRONOLOGY AND GEOCHEMISTRY OF METAVOLCANIC AND METASEDIMENTARY ROCKS IN NORTHWESTERN FUJIAN, CATHAYSIA BLOCK, CHINA: TECTONIC IMPLICATIONS AND THE NEED TO REDEFINE LITHOSTRATIGRAPHIC UNITS	GONDWANA RES.	WAN, YUSHENG; LIU, DUNYI; XU, MEIHUI; ZHUANG, JIANMIN; SONG, BIAO; SHI, YU-RUO; DU, LILIN		27.3	117.3	0.01	542	1521	2500	WET	METAMORPHIC	UNKNOWN	UNKNOWN	GNEISS						4.4											1.74
FJ0115		GEOROC	10.1016/j.gr.2006.10.016	SHRIMP U-PB ZIRCON GEOCHRONOLOGY AND GEOCHEMISTRY OF METAVOLCANIC AND METASEDIMENTARY ROCKS IN NORTHWESTERN FUJIAN, CATHAYSIA BLOCK, CHINA: TECTONIC IMPLICATIONS AND THE NEED TO REDEFINE LITHOSTRATIGRAPHIC UNITS	GONDWANA RES.	WAN, YUSHENG; LIU, DUNYI; XU, MEIHUI; ZHUANG, JIANMIN; SONG, BIAO; SHI, YU-RUO; DU, LILIN		27.3	117.3	0.01	542	1521	2500	MC_ICPMS_ID	METAMORPHIC	UNKNOWN	UNKNOWN	GNEISS																							28.119	4.884
FJ0115		GEOROC	10.1016/j.gr.2006.10.016	SHRIMP U-PB ZIRCON GEOCHRONOLOGY AND GEOCHEMISTRY OF METAVOLCANIC AND METASEDIMENTARY ROCKS IN NORTHWESTERN FUJIAN, CATHAYSIA BLOCK, CHINA: TECTONIC IMPLICATIONS AND THE NEED TO REDEFINE LITHOSTRATIGRAPHIC UNITS	GONDWANA RES.	WAN, YUSHENG; LIU, DUNYI; XU, MEIHUI; ZHUANG, JIANMIN; SONG, BIAO; SHI, YU-RUO; DU, LILIN		27.3	117.3	0.01	542	1521	2500	MC_ICPMS	METAMORPHIC	UNKNOWN	UNKNOWN	GNEISS
FJ0115		GEOROC	10.1016/j.gr.2006.10.016	SHRIMP U-PB ZIRCON GEOCHRONOLOGY AND GEOCHEMISTRY OF METAVOLCANIC AND METASEDIMENTARY ROCKS IN NORTHWESTERN FUJIAN, CATHAYSIA BLOCK, CHINA: TECTONIC IMPLICATIONS AND THE NEED TO REDEFINE LITHOSTRATIGRAPHIC UNITS	GONDWANA RES.	WAN, YUSHENG; LIU, DUNYI; XU, MEIHUI; ZHUANG, JIANMIN; SONG, BIAO; SHI, YU-RUO; DU, LILIN		27.3	117.3	0.01	542	1521	2500	ICPMS	METAMORPHIC	UNKNOWN	UNKNOWN	GNEISS																			38.84		66.51	7.09	28.67	5.22	1.51	4.34	0.75	3.41	0.67	2.11	0.27
SM/GR/98/2		GEOROC	10.1016/j.gca.2005.08.015	HIGH-PRECISION 142ND/144ND MEASUREMENTS IN TERRESTRIAL ROCKS: CONSTRAINTS ON THE EARLY DIFFERENTIATION OF THE EARTH^S MANTLE	GEOCHIM. COSMOCHIM. ACTA	CARO, G.; BOURDON, B.; BIRCK, J.-L.; MOORBATH, S.		65.045	-50.1393	0.01	3600	3650	3700	TIMS	METAMORPHIC	UNKNOWN	UNKNOWN	GNEISS
MB96-1		GEOROC	10.1086/314411	U-PB GEOCHRONOLOGIC, ND ISOTOPIC, AND GEOCHEMICAL EVIDENCE FOR THE CORRELATION OF THE CHOPAWAMSIC AND MILTON TERRANES, PIEDMONT ZONE, SOUTHERN APPALACHIAN OROGEN	J. GEOL.	COLER, D. G.; WORTMAN, G. L.; SAMSON, S. D.; HIBBARD, J. P.; STERN, RICHARD		36.6	-78.3	0.01	444	466	488	TIMS_ID	METAMORPHIC	UNKNOWN	UNKNOWN	GNEISS																							32.46	6.64
MB96-1		GEOROC	10.1086/314411	U-PB GEOCHRONOLOGIC, ND ISOTOPIC, AND GEOCHEMICAL EVIDENCE FOR THE CORRELATION OF THE CHOPAWAMSIC AND MILTON TERRANES, PIEDMONT ZONE, SOUTHERN APPALACHIAN OROGEN	J. GEOL.	COLER, D. G.; WORTMAN, G. L.; SAMSON, S. D.; HIBBARD, J. P.; STERN, RICHARD		36.6	-78.3	0.01	444	466	488	TIMS	METAMORPHIC	UNKNOWN	UNKNOWN	GNEISS
72012		GEOROC	10.1016/j.jvolgeores.2006.04.002	RB-SR WHOLE ROCK ISOCHRON AGES OF GRANITIC ROCKS FROM THE CENTRAL KYUSHU, JAPAN	MEM. GEOL. SOC. JAPAN	OSANAI, Y.; MASAO, S.; KAGAMI, H.		33.3	131.3	0.01	132.1	132.1	132.1	NOT GIVEN	METAMORPHIC	UNKNOWN	UNKNOWN	GNEISS
8N-340		GEOROC	10.1016/0301-9268(92)90055-S	RB-SR AGES OF LATE ARCHAEAN METAVOLCANICS AND GRANITES, DHARWAR CRATON, SOUTH INDIA AND EVIDENCE FOR EARLY PROTEROZOIC THERMOTECTONIC EVENT(S)	PREC. RESEARCH	BHASKAR RAO, Y. J.; SIVARAMAN, T. V.; PANTULU, G. V. C.; GOPALAN, K.; NAQVI, S. M.		16.27	77.25	0.01	2500	3175	3850	XRF	METAMORPHIC	UNKNOWN	UNKNOWN	GNEISS	71.7	0.35	14.77		2.29			0.64	2.57		1.61	0.09	0.01
8N-340		GEOROC	10.1016/0301-9268(92)90055-S	RB-SR AGES OF LATE ARCHAEAN METAVOLCANICS AND GRANITES, DHARWAR CRATON, SOUTH INDIA AND EVIDENCE FOR EARLY PROTEROZOIC THERMOTECTONIC EVENT(S)	PREC. RESEARCH	BHASKAR RAO, Y. J.; SIVARAMAN, T. V.; PANTULU, G. V. C.; GOPALAN, K.; NAQVI, S. M.		16.27	77.25	0.01	2500	3175	3850	TIMS_ID	METAMORPHIC	UNKNOWN	UNKNOWN	GNEISS
8N-340		GEOROC	10.1016/0301-9268(92)90055-S	RB-SR AGES OF LATE ARCHAEAN METAVOLCANICS AND GRANITES, DHARWAR CRATON, SOUTH INDIA AND EVIDENCE FOR EARLY PROTEROZOIC THERMOTECTONIC EVENT(S)	PREC. RESEARCH	BHASKAR RAO, Y. J.; SIVARAMAN, T. V.; PANTULU, G. V. C.; GOPALAN, K.; NAQVI, S. M.		16.27	77.25	0.01	2500	3175	3850	TIMS	METAMORPHIC	UNKNOWN	UNKNOWN	GNEISS
8N-340		GEOROC	10.1016/0301-9268(92)90055-S	RB-SR AGES OF LATE ARCHAEAN METAVOLCANICS AND GRANITES, DHARWAR CRATON, SOUTH INDIA AND EVIDENCE FOR EARLY PROTEROZOIC THERMOTECTONIC EVENT(S)	PREC. RESEARCH	BHASKAR RAO, Y. J.; SIVARAMAN, T. V.; PANTULU, G. V. C.; GOPALAN, K.; NAQVI, S. M.		16.27	77.25	0.01	2500	3175	3850	IGN	METAMORPHIC	UNKNOWN	UNKNOWN	GNEISS														0.51
8N-340		GEOROC	10.1016/0301-9268(92)90055-S	RB-SR AGES OF LATE ARCHAEAN METAVOLCANICS AND GRANITES, DHARWAR CRATON, SOUTH INDIA AND EVIDENCE FOR EARLY PROTEROZOIC THERMOTECTONIC EVENT(S)	PREC. RESEARCH	BHASKAR RAO, Y. J.; SIVARAMAN, T. V.; PANTULU, G. V. C.; GOPALAN, K.; NAQVI, S. M.		16.27	77.25	0.01	2500	3175	3850	ICPMS	METAMORPHIC	UNKNOWN	UNKNOWN	GNEISS																			21.9		41.5		15	3.1	0.7	3.2	0.4	1.8		0.9	0.1
8N-340		GEOROC	10.1016/0301-9268(92)90055-S	RB-SR AGES OF LATE ARCHAEAN METAVOLCANICS AND GRANITES, DHARWAR CRATON, SOUTH INDIA AND EVIDENCE FOR EARLY PROTEROZOIC THERMOTECTONIC EVENT(S)	PREC. RESEARCH	BHASKAR RAO, Y. J.; SIVARAMAN, T. V.; PANTULU, G. V. C.; GOPALAN, K.; NAQVI, S. M.		16.27	77.25	0.01	2500	3175	3850	AAS	METAMORPHIC	UNKNOWN	UNKNOWN	GNEISS										5.64
69121504		GEOROC	10.1016/0301-9268(93)90079-H	ON THE RYOKE GRANITIC AND METAMORPHIC ROCKS IN THE TOYONE-MURA AREA, AICHI PREFECTURE, JAPAN	MEM. FAC. SCI., KYOTO UNIV., SER. GEOL. MINERAL.	KUTSUKAKE, T.		34.5	137	0.01				NOT GIVEN	METAMORPHIC	UNKNOWN	UNKNOWN	GNEISS	63.83	0.54	16.72	0.39		4.75		2.37	1.35	1.1	5.96		0.07		2.87	0.12
13JN21-3		GEOROC	10.1016/j.precamres.2016.09.025	NEOARCHEAN ANDEAN-TYPE ACTIVE CONTINENTAL MARGIN IN THE NORTHEASTERN NORTH CHINA CRATON: GEOCHEMICAL AND GEOCHRONOLOGICAL EVIDENCE FROM METAVOLCANIC ROCKS IN THE JIAPIGOU GRANITE-GREENSTONE BELT, SOUTHERN JILIN PROVINCE	PREC. RESEARCH	GUO, BORAN; LIU, SHUWEN; ZHANG, JIAN; WANG, WEI; FU, JINGHAO; WANG, MAOJIANG		42.8778	127.408	0.01	2500	3175	3850	XRF	METAMORPHIC	UNKNOWN	UNKNOWN	GNEISS	67.48	0.7	14.72		6.77			1.78	2.17	3.01	2.79	0.07	0.06
13JN21-3		GEOROC	10.1016/j.precamres.2016.09.025	NEOARCHEAN ANDEAN-TYPE ACTIVE CONTINENTAL MARGIN IN THE NORTHEASTERN NORTH CHINA CRATON: GEOCHEMICAL AND GEOCHRONOLOGICAL EVIDENCE FROM METAVOLCANIC ROCKS IN THE JIAPIGOU GRANITE-GREENSTONE BELT, SOUTHERN JILIN PROVINCE	PREC. RESEARCH	GUO, BORAN; LIU, SHUWEN; ZHANG, JIAN; WANG, WEI; FU, JINGHAO; WANG, MAOJIANG		42.8778	127.408	0.01	2500	3175	3850	MC_ICPMS	METAMORPHIC	UNKNOWN	UNKNOWN	GNEISS																			32		68	7.38	29	4.41	1.57	4.84	0.56	3.22	0.62	1.98	0.26
13JN21-3		GEOROC	10.1016/j.precamres.2016.09.025	NEOARCHEAN ANDEAN-TYPE ACTIVE CONTINENTAL MARGIN IN THE NORTHEASTERN NORTH CHINA CRATON: GEOCHEMICAL AND GEOCHRONOLOGICAL EVIDENCE FROM METAVOLCANIC ROCKS IN THE JIAPIGOU GRANITE-GREENSTONE BELT, SOUTHERN JILIN PROVINCE	PREC. RESEARCH	GUO, BORAN; LIU, SHUWEN; ZHANG, JIAN; WANG, WEI; FU, JINGHAO; WANG, MAOJIANG		42.8778	127.408	0.01	2500	3175	3850	IGN	METAMORPHIC	UNKNOWN	UNKNOWN	GNEISS														0.27
C137-37		GEOROC	10.1007/BF01132327	A 3500 MA PLUTONIC AND VOLCANIC CALC-ALKALINE PROVINCE IN THE ARCHEAN EAST PILBARA BLOCK	CONTRIB. MINERAL. PETROL.	BICKLE, M. J.; BETTENAY, M. E.; BARLEY, M. E.; CHAPMAN, N. A.; GROVES, D. I.; CAMPBELL, I. H.; DE LAETER, J. R.		-21.25	119.25	0.01	3500	3500	3500	XRF	METAMORPHIC	UNKNOWN	UNKNOWN	GNEISS	68.6	0.4	15.34	1				1.05	2.93	4.47	2.39	0.16	0.06
C137-37		GEOROC	10.1007/BF01132327	A 3500 MA PLUTONIC AND VOLCANIC CALC-ALKALINE PROVINCE IN THE ARCHEAN EAST PILBARA BLOCK	CONTRIB. MINERAL. PETROL.	BICKLE, M. J.; BETTENAY, M. E.; BARLEY, M. E.; CHAPMAN, N. A.; GROVES, D. I.; CAMPBELL, I. H.; DE LAETER, J. R.		-21.25	119.25	0.01	3500	3500	3500	WET	METAMORPHIC	UNKNOWN	UNKNOWN	GNEISS						2.14									0.67	0.21
C137-37		GEOROC	10.1007/BF01132327	A 3500 MA PLUTONIC AND VOLCANIC CALC-ALKALINE PROVINCE IN THE ARCHEAN EAST PILBARA BLOCK	CONTRIB. MINERAL. PETROL.	BICKLE, M. J.; BETTENAY, M. E.; BARLEY, M. E.; CHAPMAN, N. A.; GROVES, D. I.; CAMPBELL, I. H.; DE LAETER, J. R.		-21.25	119.25	0.01	3500	3500	3500	TIMS	METAMORPHIC	UNKNOWN	UNKNOWN	GNEISS
C137-37		GEOROC	10.1007/BF01132327	A 3500 MA PLUTONIC AND VOLCANIC CALC-ALKALINE PROVINCE IN THE ARCHEAN EAST PILBARA BLOCK	CONTRIB. MINERAL. PETROL.	BICKLE, M. J.; BETTENAY, M. E.; BARLEY, M. E.; CHAPMAN, N. A.; GROVES, D. I.; CAMPBELL, I. H.; DE LAETER, J. R.		-21.25	119.25	0.01	3500	3500	3500	INAA	METAMORPHIC	UNKNOWN	UNKNOWN	GNEISS																			58.4		112		45	7.05	1.44		0.74		0.6		0.35
B-79-15B		GEOROC	10.3989/egeol.01575-6134	GEOCHRONOLOGIC AND SR-ISOTOPIC STUDIES OF CERTAIN UNITS IN THE BARBERTON GRANITE-GREENSTONE TERRANE, SOUTH AFRICA	SPEC. PUBL. GEOL. SOC. S. AFR.	BARTON, J. M. JR.; ROBB, L. J.; ANHAEUSSER, C. R.; VAN NIEROP, D. A.		-25.8	31	0.01	2500	3175	3850	NOT GIVEN	METAMORPHIC	UNKNOWN	UNKNOWN	GNEISS
630		GEOROC	10.1130/0016-7606(1977)88<241:RGOTCB>2.0.CO;2	RECONNAISSANCE GEOCHRONOLOGY OF THE CRYSTALLINE BASEMENT ROCKS OF THE COASTAL CORDILLERA OF SOUTHERN PERU	BULL. GEOL. SOC. AM.	COBBING, E. J.; OZARD, J. M.; SNELLING, N. J.		-17	-72	0.01				XRF	METAMORPHIC	UNKNOWN	UNKNOWN	GNEISS
630		GEOROC	10.1130/0016-7606(1977)88<241:RGOTCB>2.0.CO;2	RECONNAISSANCE GEOCHRONOLOGY OF THE CRYSTALLINE BASEMENT ROCKS OF THE COASTAL CORDILLERA OF SOUTHERN PERU	BULL. GEOL. SOC. AM.	COBBING, E. J.; OZARD, J. M.; SNELLING, N. J.		-17	-72	0.01				TIMS	METAMORPHIC	UNKNOWN	UNKNOWN	GNEISS
VDA 9907		GEOROC	10.1016/S0301-9268(03)00084-6	DERIVATION OF THE 1.0-0.9 GA FERRO-POTASSIC A-TYPE GRANITOIDS OF SOUTHERN NORWAY BY EXTREME DIFFERENTIATION FROM BASIC MAGMAS	PREC. RESEARCH	VANDER AUWERA, J.; BOGAERTS, M.; LIEGEOIS, J.-P.; DEMAIFFE, D.; WILMART, E.; BOLLE, OL; DUCHESNE, J.-C.		58	7	0.01	542	1521	2500	XRF/TIT	METAMORPHIC	UNKNOWN	UNKNOWN	GNEISS	68.46	0.64	13.02	6.57				2.07	4.31	3.28	0.85	0.1	0.11
VDA 9907		GEOROC	10.1016/S0301-9268(03)00084-6	DERIVATION OF THE 1.0-0.9 GA FERRO-POTASSIC A-TYPE GRANITOIDS OF SOUTHERN NORWAY BY EXTREME DIFFERENTIATION FROM BASIC MAGMAS	PREC. RESEARCH	VANDER AUWERA, J.; BOGAERTS, M.; LIEGEOIS, J.-P.; DEMAIFFE, D.; WILMART, E.; BOLLE, OL; DUCHESNE, J.-C.		58	7	0.01	542	1521	2500	XRF/ICPMS/INAA	METAMORPHIC	UNKNOWN	UNKNOWN	GNEISS																			24		56	7.2	30	6.7	1.3	7.09	1.21	7.79		4.99	0.79
VDA 9907		GEOROC	10.1016/S0301-9268(03)00084-6	DERIVATION OF THE 1.0-0.9 GA FERRO-POTASSIC A-TYPE GRANITOIDS OF SOUTHERN NORWAY BY EXTREME DIFFERENTIATION FROM BASIC MAGMAS	PREC. RESEARCH	VANDER AUWERA, J.; BOGAERTS, M.; LIEGEOIS, J.-P.; DEMAIFFE, D.; WILMART, E.; BOLLE, OL; DUCHESNE, J.-C.		58	7	0.01	542	1521	2500	TIMS	METAMORPHIC	UNKNOWN	UNKNOWN	GNEISS
SKR-3		GEOROC	10.1016/0012-821X(78)90040-7	STRONTIUM, LEAD AND OXYGEN ISOTOPIC INVESTIGATION OF THE SKAERGARD INTRUSION, EAST GREENLAND	EARTH PLANET. SCI. LETT.	LEEMAN, W. P.; DASCH, E. J.		68.1	-31.5	0.01				XRF	METAMORPHIC	UNKNOWN	UNKNOWN	GNEISS
SKR-3		GEOROC	10.1016/0012-821X(78)90040-7	STRONTIUM, LEAD AND OXYGEN ISOTOPIC INVESTIGATION OF THE SKAERGARD INTRUSION, EAST GREENLAND	EARTH PLANET. SCI. LETT.	LEEMAN, W. P.; DASCH, E. J.		68.1	-31.5	0.01				TIMS	METAMORPHIC	UNKNOWN	UNKNOWN	GNEISS
B-79-13E		GEOROC	10.2113/gsecongeo.95.3.495	GEOCHRONOLOGIC AND SR-ISOTOPIC STUDIES OF CERTAIN UNITS IN THE BARBERTON GRANITE-GREENSTONE TERRANE, SOUTH AFRICA	SPEC. PUBL. GEOL. SOC. S. AFR.	BARTON, J. M. JR.; ROBB, L. J.; ANHAEUSSER, C. R.; VAN NIEROP, D. A.		-26.1	31	0.01	2500	3175	3850	NOT GIVEN	METAMORPHIC	UNKNOWN	UNKNOWN	GNEISS
OES-99-65		GEOROC	10.1016/S0301-9268(02)00026-8	U-PB GEOCHRONOLOGY AND GEOCHEMISTRY OF EARLY PROTEROZOIC ROCKS OF THE TECTONIC BASEMENT WINDOWS IN CENTRAL NORDLAND, CALEDONIDES OF NORTH-CENTRAL NORWAY	PREC. RESEARCH	SKAR, O.		67	12.5	0.01				XRF	METAMORPHIC	UNKNOWN	UNKNOWN	GNEISS	62.23	0.75	16.7		5.43			1.61	3.58	3.21	3.83	0.32	0.11						43		77		27
OES-99-65		GEOROC	10.1016/S0301-9268(02)00026-8	U-PB GEOCHRONOLOGY AND GEOCHEMISTRY OF EARLY PROTEROZOIC ROCKS OF THE TECTONIC BASEMENT WINDOWS IN CENTRAL NORDLAND, CALEDONIDES OF NORTH-CENTRAL NORWAY	PREC. RESEARCH	SKAR, O.		67	12.5	0.01				TIMS_ID	METAMORPHIC	UNKNOWN	UNKNOWN	GNEISS																							37.88	6.84
OES-99-65		GEOROC	10.1016/S0301-9268(02)00026-8	U-PB GEOCHRONOLOGY AND GEOCHEMISTRY OF EARLY PROTEROZOIC ROCKS OF THE TECTONIC BASEMENT WINDOWS IN CENTRAL NORDLAND, CALEDONIDES OF NORTH-CENTRAL NORWAY	PREC. RESEARCH	SKAR, O.		67	12.5	0.01				TIMS	METAMORPHIC	UNKNOWN	UNKNOWN	GNEISS
OES-99-65		GEOROC	10.1016/S0301-9268(02)00026-8	U-PB GEOCHRONOLOGY AND GEOCHEMISTRY OF EARLY PROTEROZOIC ROCKS OF THE TECTONIC BASEMENT WINDOWS IN CENTRAL NORDLAND, CALEDONIDES OF NORTH-CENTRAL NORWAY	PREC. RESEARCH	SKAR, O.		67	12.5	0.01				IGN	METAMORPHIC	UNKNOWN	UNKNOWN	GNEISS														0.26
23		GEOROC	10.1016/0377-0273(77)90015-4	STRONTIUM ISOTOPIC COMPOSITION AND TRACE-ELEMENT DATA BEARING ON THE ORIGIN OF CENOZOIC VOLCANIC ROCKS OF THE CENTRAL AND SOUTHERN ANDES	J. VOLCANOL. GEOTHERM. RES.	KLERKX, J.; DEUTSCH, S.; PICHLER, H.; ZEIL, W.		-24	-66	0.01				XRF	METAMORPHIC	UNKNOWN	UNKNOWN	GNEISS
23		GEOROC	10.1016/0377-0273(77)90015-4	STRONTIUM ISOTOPIC COMPOSITION AND TRACE-ELEMENT DATA BEARING ON THE ORIGIN OF CENOZOIC VOLCANIC ROCKS OF THE CENTRAL AND SOUTHERN ANDES	J. VOLCANOL. GEOTHERM. RES.	KLERKX, J.; DEUTSCH, S.; PICHLER, H.; ZEIL, W.		-24	-66	0.01				TIMS	METAMORPHIC	UNKNOWN	UNKNOWN	GNEISS
F19		GEOROC	10.1007/BF00373681	GEOCHRONOLOGY OF AN ARCHAEAN TONALITIC GNEISS DOME IN NORTHERN FINLAND AND ITS RELATION WITH AN UNUSUAL OVERLYING VOLCANIC CONGLOMERATE AND KOMATIITIC GREENSTONE	CONTRIB. MINERAL. PETROL.	KRÖNER, A.; PUUSTINEN, K.; HICKMAN, M.		67.81	26.86	0.01	2500	3175	3850	WET	METAMORPHIC	UNKNOWN	UNKNOWN	GNEISS	68.21	0.58	15.35	2.22		1.38		0.91	3.72	4.63	1.78	0.11	0.04	1
PC-160		GEOROC	10.1093/petrology/egr014	IMPLICATIONS OF THE NUVVUAGITTUQ GREENSTONE BELT FOR THE FORMATION OF EARTHS EARLY CRUST	J. PETROL.	O^NEIL, J.; FRANCIS, D. M.; CARLSON, R. W.		58	-77	0.01				XRF	METAMORPHIC	UNKNOWN	UNKNOWN	GNEISS	55.41	0.618	17.53				12.2644	6.77	0.14	0.16	1.81	0.062	0.1
PC-160		GEOROC	10.1093/petrology/egr014	IMPLICATIONS OF THE NUVVUAGITTUQ GREENSTONE BELT FOR THE FORMATION OF EARTHS EARLY CRUST	J. PETROL.	O^NEIL, J.; FRANCIS, D. M.; CARLSON, R. W.		58	-77	0.01				IGN	METAMORPHIC	UNKNOWN	UNKNOWN	GNEISS														4.2
PC-160		GEOROC	10.1093/petrology/egr014	IMPLICATIONS OF THE NUVVUAGITTUQ GREENSTONE BELT FOR THE FORMATION OF EARTHS EARLY CRUST	J. PETROL.	O^NEIL, J.; FRANCIS, D. M.; CARLSON, R. W.		58	-77	0.01				ICPMS	METAMORPHIC	UNKNOWN	UNKNOWN	GNEISS																			11.9		23.8	2.67	10.4	2.5	0.707	2.41	0.48	3.16	0.66	2.07	0.319
CB70		GEOROC	10.1016/0024-4937(94)90044-2	ARC RELATED JURASSIC IGNEOUS AND META-IGNEOUS ROCKS IN THE COSTAL CORDILLERA OF NORTHERN CHILE / REGION ANTOFAGASTA	LITHOS	LUCASSEN, F.; FRANZ, G.		-23.8	-70.5	0.01				XRF	METAMORPHIC	UNKNOWN	UNKNOWN	GNEISS	50.45	0.99	19.74		10.24			4.9	9.93	3.29	0.13	0.13	0.17
CB70		GEOROC	10.1016/0024-4937(94)90044-2	ARC RELATED JURASSIC IGNEOUS AND META-IGNEOUS ROCKS IN THE COSTAL CORDILLERA OF NORTHERN CHILE / REGION ANTOFAGASTA	LITHOS	LUCASSEN, F.; FRANZ, G.		-23.8	-70.5	0.01				NOT GIVEN	METAMORPHIC	UNKNOWN	UNKNOWN	GNEISS
CB70		GEOROC	10.1016/0024-4937(94)90044-2	ARC RELATED JURASSIC IGNEOUS AND META-IGNEOUS ROCKS IN THE COSTAL CORDILLERA OF NORTHERN CHILE / REGION ANTOFAGASTA	LITHOS	LUCASSEN, F.; FRANZ, G.		-23.8	-70.5	0.01				MS_ID	METAMORPHIC	UNKNOWN	UNKNOWN	GNEISS																			2.32		5.55	1.86	4.4	1.36	0.85	1.7		2.11		1.32
OX-70		GEOROC	10.1016/S0301-9268(00)00150-9	A GRENVILLIAN ARC ON THE MARGIN OF AMAZONIA: EVIDENCE FROM THE SOUTHERN OAXACAN COMPLEX, SOUTHERN MEXICO	PREC. RESEARCH	KEPPIE, J. D.; DOSTAL, J.; CONREY, R.M.; LOPEZ, R.		17	-96.5	0.01	542	1521	2500	XRF	METAMORPHIC	UNKNOWN	UNKNOWN	GNEISS	56.57	1.21	17.09		8.75			2.08	5.38	3.26	2.33	0.37	0.14
OX-70		GEOROC	10.1016/S0301-9268(00)00150-9	A GRENVILLIAN ARC ON THE MARGIN OF AMAZONIA: EVIDENCE FROM THE SOUTHERN OAXACAN COMPLEX, SOUTHERN MEXICO	PREC. RESEARCH	KEPPIE, J. D.; DOSTAL, J.; CONREY, R.M.; LOPEZ, R.		17	-96.5	0.01	542	1521	2500	IGN	METAMORPHIC	UNKNOWN	UNKNOWN	GNEISS														0.1
OX-70		GEOROC	10.1016/S0301-9268(00)00150-9	A GRENVILLIAN ARC ON THE MARGIN OF AMAZONIA: EVIDENCE FROM THE SOUTHERN OAXACAN COMPLEX, SOUTHERN MEXICO	PREC. RESEARCH	KEPPIE, J. D.; DOSTAL, J.; CONREY, R.M.; LOPEZ, R.		17	-96.5	0.01	542	1521	2500	ICPMS	METAMORPHIC	UNKNOWN	UNKNOWN	GNEISS																			34		69.27	9.23	39.75	7.89	2.88	7.34	1.04	6.29	1.31	3.76	0.53
1417		GEOROC	10.1093/petrology/41.7.967	GEOLOGY OF CARBONATITE- ALKALIC ROCK COMPLEXES IN ONTARIO	ONTARIO GEOL. SURV. STUDY	SAGE, R. P.		47.92	-83.25	0.01	542	1521	2500	NOT GIVEN	METAMORPHIC	UNKNOWN	UNKNOWN	GNEISS	58.6	0.42	16.3	2.44		1.75		2.66	4.79	8.47	1.78	0.2	0.1		0.22	0.36			0		110		50
SC06/12		GEOROC	10.1016/j.precamres.2014.09.024	GEOCHEMICAL AND ION-MICROPROBE U-PB ZIRCON CONSTRAINTS ON THE ARCHAEAN EVOLUTION OF SINGHBUM CRATON, EASTERN INDIA	PREC. RESEARCH	NELSON, D. R.; BHATTACHARYA, H. N.; THERN, E. R.; ALTERMANN, W.		22.1158	85.6864	0.01	2500	3175	3850	XRF	METAMORPHIC	UNKNOWN	UNKNOWN	GNEISS	69.76	0.31	15.6		2.66			0.67	2.55	4.7	2.54	0.12	0.04
SC06/12		GEOROC	10.1016/j.precamres.2014.09.024	GEOCHEMICAL AND ION-MICROPROBE U-PB ZIRCON CONSTRAINTS ON THE ARCHAEAN EVOLUTION OF SINGHBUM CRATON, EASTERN INDIA	PREC. RESEARCH	NELSON, D. R.; BHATTACHARYA, H. N.; THERN, E. R.; ALTERMANN, W.		22.1158	85.6864	0.01	2500	3175	3850	IGN	METAMORPHIC	UNKNOWN	UNKNOWN	GNEISS														0.59
SC06/12		GEOROC	10.1016/j.precamres.2014.09.024	GEOCHEMICAL AND ION-MICROPROBE U-PB ZIRCON CONSTRAINTS ON THE ARCHAEAN EVOLUTION OF SINGHBUM CRATON, EASTERN INDIA	PREC. RESEARCH	NELSON, D. R.; BHATTACHARYA, H. N.; THERN, E. R.; ALTERMANN, W.		22.1158	85.6864	0.01	2500	3175	3850	ICPMS	METAMORPHIC	UNKNOWN	UNKNOWN	GNEISS																			34		59	5.9	23.1	4.1	0.89	3	0.4	1.9	0.38	0.9	0.11
EO-115		GEOROC	10.1016/j.lithos.2012.05.025	U-PB AGES AND GEOCHEMISTRY OF MAFIC DYKE SWARMS FROM THE UAUA BLOCK, SAO FRANCISCO CRATON, BRAZIL: LIPS REMNANTS RELEVANT FOR LATE ARCHAEAN	LITHOS	OLIVEIRA, E. P.; SILVEIRA, E. M.; SÖDERLUND, U.; ERNST, R. E.		-9.61	-39.48	0.01				XRF	METAMORPHIC	UNKNOWN	UNKNOWN	GNEISS	55.9	0.94	17.66		8.77			2.84	7.24	4.38	0.4	0.47	0.11
EO-115		GEOROC	10.1016/j.lithos.2012.05.025	U-PB AGES AND GEOCHEMISTRY OF MAFIC DYKE SWARMS FROM THE UAUA BLOCK, SAO FRANCISCO CRATON, BRAZIL: LIPS REMNANTS RELEVANT FOR LATE ARCHAEAN	LITHOS	OLIVEIRA, E. P.; SILVEIRA, E. M.; SÖDERLUND, U.; ERNST, R. E.		-9.61	-39.48	0.01				TIMS_ID	METAMORPHIC	UNKNOWN	UNKNOWN	GNEISS																							20.564	3.926
EO-115		GEOROC	10.1016/j.lithos.2012.05.025	U-PB AGES AND GEOCHEMISTRY OF MAFIC DYKE SWARMS FROM THE UAUA BLOCK, SAO FRANCISCO CRATON, BRAZIL: LIPS REMNANTS RELEVANT FOR LATE ARCHAEAN	LITHOS	OLIVEIRA, E. P.; SILVEIRA, E. M.; SÖDERLUND, U.; ERNST, R. E.		-9.61	-39.48	0.01				TIMS	METAMORPHIC	UNKNOWN	UNKNOWN	GNEISS
EO-115		GEOROC	10.1016/j.lithos.2012.05.025	U-PB AGES AND GEOCHEMISTRY OF MAFIC DYKE SWARMS FROM THE UAUA BLOCK, SAO FRANCISCO CRATON, BRAZIL: LIPS REMNANTS RELEVANT FOR LATE ARCHAEAN	LITHOS	OLIVEIRA, E. P.; SILVEIRA, E. M.; SÖDERLUND, U.; ERNST, R. E.		-9.61	-39.48	0.01				IGN	METAMORPHIC	UNKNOWN	UNKNOWN	GNEISS														1.2
EO-115		GEOROC	10.1016/j.lithos.2012.05.025	U-PB AGES AND GEOCHEMISTRY OF MAFIC DYKE SWARMS FROM THE UAUA BLOCK, SAO FRANCISCO CRATON, BRAZIL: LIPS REMNANTS RELEVANT FOR LATE ARCHAEAN	LITHOS	OLIVEIRA, E. P.; SILVEIRA, E. M.; SÖDERLUND, U.; ERNST, R. E.		-9.61	-39.48	0.01				ICPMS	METAMORPHIC	UNKNOWN	UNKNOWN	GNEISS																			18.13		39.61	5.24	21.95	4.01	1.51	3.78	0.54	2.9	0.56	1.48	0.19
11JD02-3		GEOROC	10.1016/j.gr.2012.12.025	GEOCHEMISTRY, ZIRCON U-PB GEOCHRONOLOGY AND LU-HF ISOTOPES OF METAVOLCANICS FROM EASTERN HEBEI REVEAL NEOARCHEAN SUBDUCTION TECTONICS IN THE NORTH CHINA CRATON	GONDWANA RES.	GUO, RONGRONG; LIU, SHUWEN; SANTOSH, M.; LI, QIUGEN; BAI, XIANG; WANG, WEI		40.3761	118.209	0.01	2500	3175	3850	XRF	METAMORPHIC	UNKNOWN	UNKNOWN	GNEISS	61.4	0.62	13.09		9.95		8.95	3.42	3.6	3.07	2.57	0.19	0.08
11JD02-3		GEOROC	10.1016/j.gr.2012.12.025	GEOCHEMISTRY, ZIRCON U-PB GEOCHRONOLOGY AND LU-HF ISOTOPES OF METAVOLCANICS FROM EASTERN HEBEI REVEAL NEOARCHEAN SUBDUCTION TECTONICS IN THE NORTH CHINA CRATON	GONDWANA RES.	GUO, RONGRONG; LIU, SHUWEN; SANTOSH, M.; LI, QIUGEN; BAI, XIANG; WANG, WEI		40.3761	118.209	0.01	2500	3175	3850	MC_ICPMS	METAMORPHIC	UNKNOWN	UNKNOWN	GNEISS																			23		51	6.31	28	5.31	1.36	4.82	0.66	3.51	0.67	1.84	0.27
11JD02-3		GEOROC	10.1016/j.gr.2012.12.025	GEOCHEMISTRY, ZIRCON U-PB GEOCHRONOLOGY AND LU-HF ISOTOPES OF METAVOLCANICS FROM EASTERN HEBEI REVEAL NEOARCHEAN SUBDUCTION TECTONICS IN THE NORTH CHINA CRATON	GONDWANA RES.	GUO, RONGRONG; LIU, SHUWEN; SANTOSH, M.; LI, QIUGEN; BAI, XIANG; WANG, WEI		40.3761	118.209	0.01	2500	3175	3850	IGN	METAMORPHIC	UNKNOWN	UNKNOWN	GNEISS														1.88
LL26-2		GEOROC	10.1016/j.jvolgeores.2005.07.036	THE 2.2-2.1 GA MAGMATIC EVENT AND ITS TECTONIC IMPLICATION IN THE LÜLIANG MOUNTAINS, NORTH CHINA CRATON	ACTA PETROL. SINICA (YANSHI-XUEBAO)	DU, LILIN; YANG, CHONGHUI; REN, LIUDONG; SONG, HUIXIA; GENG, YUANSHENG; WAN, YUSHENG		38	111	0.01	542	1521	2500	NOT GIVEN	METAMORPHIC	UNKNOWN	UNKNOWN	GNEISS	60.66	0.71	18.66	1.95		2.21		1.15	3.06	3.95	6.54	0.21	0.08	0.17	0.22				47.3		92.6	9.92	35.6	5.3	1.84	4.97	0.52	2.68	0.55	1.6	0.21
AK 93-17		GEOROC	10.1016/S1251-8050(98)80004-9	THE ACHKAL OLIGOCENE RING COMPLEX: SR, ND, PB EVIDENCE FOR TRANSITION BETWEEN THOLEIITIC AND ALKALI CENOZOIC MAGMATISM IN CENTRAL HOGGAR (SOUTH ALGERIA)	COMPT. REND. ACAD. SCI. PARIS SER. 2A	MAZA, M.; BRIQUEU, L.; DAUTRIA, J.-M.; BOSCH, D.		24	6.5	0.01	23	28.45	33.9	NOT GIVEN	METAMORPHIC	UNKNOWN	UNKNOWN	GNEISS																							80.36	13.04
BH125		GEOROC	10.1144/GSL.SP.1987.033.01.27	THE GEOCHEMISTRY OF THE LOWER PROTEROZOIC WILLYAMA COMPLEX VOLCANICS, BROKEN HILL BLOCK, NEW SOUTH WALES	SPEC. PUBL. GEOL. SOC. LONDON	JAMES, S. D.; PEARCE, J. A.; OLIVER, R. A.		-31.5	141	0.01				XRF	METAMORPHIC	UNKNOWN	UNKNOWN	GNEISS	44.5	2.6	14.05		20.69			3.64	12.89	0.3	0.4	0.26	0.64
BH125		GEOROC	10.1144/GSL.SP.1987.033.01.27	THE GEOCHEMISTRY OF THE LOWER PROTEROZOIC WILLYAMA COMPLEX VOLCANICS, BROKEN HILL BLOCK, NEW SOUTH WALES	SPEC. PUBL. GEOL. SOC. LONDON	JAMES, S. D.; PEARCE, J. A.; OLIVER, R. A.		-31.5	141	0.01				AAS	METAMORPHIC	UNKNOWN	UNKNOWN	GNEISS
68050202		GEOROC	10.5575/geosoc.111.727	ON THE RYOKE GRANITIC AND METAMORPHIC ROCKS IN THE TOYONE-MURA AREA, AICHI PREFECTURE, JAPAN	MEM. FAC. SCI., KYOTO UNIV., SER. GEOL. MINERAL.	KUTSUKAKE, T.		34.5	137	0.01				NOT GIVEN	METAMORPHIC	UNKNOWN	UNKNOWN	GNEISS	73.55	0.62	13.55	0.22		2.67		1.59	0.89	0.72	3.38	0.05	0.2		1.74	0.22
IN05016		GEOROC	10.1016/j.epsl.2006.11.034	PRE-3750 MA SUPRACRUSTAL ROCKS FROM THE NUVVUAGITTUQ SUPRACRUSTAL BELT, NORTHERN QUEBEC	EARTH PLANET. SCI. LETT.	CATES, N. L.; MOJZSIS, S. J.		58	-77	0.01				XRF	METAMORPHIC	UNKNOWN	UNKNOWN	GNEISS	66.68	0.41	15.176		5.38852			2.85	2.27446	3.77063	1.98418	0.11	0.02
IN05016		GEOROC	10.1016/j.epsl.2006.11.034	PRE-3750 MA SUPRACRUSTAL ROCKS FROM THE NUVVUAGITTUQ SUPRACRUSTAL BELT, NORTHERN QUEBEC	EARTH PLANET. SCI. LETT.	CATES, N. L.; MOJZSIS, S. J.		58	-77	0.01				ICPMS	METAMORPHIC	UNKNOWN	UNKNOWN	GNEISS																			28.1211		49.7802	5.36845	19.7508	3.44722	1.24335	2.7374	0.320474	1.24759	0.158477	0.316318	0.0326999
G3B		GEOROC	10.1029/91JB01640	CRUSTAL GROWTH IN WEST AFRICA AT 2.1 GA	J. GEOPHYS. RES.	BOHER, M.; ABOUCHAMI, W.; MICHARD, A.; ALBAREDE, F.; ARNDT, N. T.		13.48	-0.82	0.01	542	1521	2500	TIMS_ID	METAMORPHIC	UNKNOWN	UNKNOWN	GNEISS																							7.94	2.5
G3B		GEOROC	10.1029/91JB01640	CRUSTAL GROWTH IN WEST AFRICA AT 2.1 GA	J. GEOPHYS. RES.	BOHER, M.; ABOUCHAMI, W.; MICHARD, A.; ALBAREDE, F.; ARNDT, N. T.		13.48	-0.82	0.01	542	1521	2500	TIMS	METAMORPHIC	UNKNOWN	UNKNOWN	GNEISS
74HK94A		GEOROC	10.1111/j.1400-0952.2004.01053.x	CENOZOIC GRANITOIDS OF CENTRAL HOKKAIDO, JAPAN - AN EXAMPLE OF PLUTONISM ALONG COLLISION BELT	BULL. GEOL. SURV. JAPAN	ISHIHARA, S.; TERASHIMA, S.		42	143	0.01	23	28.45	33.9	WET/AAS	METAMORPHIC	UNKNOWN	UNKNOWN	GNEISS	64.79	0.51	16.62	1.44		3.38		2.11	3.35	3.94	2.05	0.05	0.07		0.82	0.34
74HK94A		GEOROC	10.1111/j.1400-0952.2004.01053.x	CENOZOIC GRANITOIDS OF CENTRAL HOKKAIDO, JAPAN - AN EXAMPLE OF PLUTONISM ALONG COLLISION BELT	BULL. GEOL. SURV. JAPAN	ISHIHARA, S.; TERASHIMA, S.		42	143	0.01	23	28.45	33.9	TIMS	METAMORPHIC	UNKNOWN	UNKNOWN	GNEISS
74HK94A		GEOROC	10.1111/j.1400-0952.2004.01053.x	CENOZOIC GRANITOIDS OF CENTRAL HOKKAIDO, JAPAN - AN EXAMPLE OF PLUTONISM ALONG COLLISION BELT	BULL. GEOL. SURV. JAPAN	ISHIHARA, S.; TERASHIMA, S.		42	143	0.01	23	28.45	33.9	WET/AAS	METAMORPHIC	UNKNOWN	UNKNOWN	GNEISS									3.35	3.94	2.05
2		GEOROC	10.1007/BF00283322	THE MUD TANK CARBONATITE COMPLEX, CENTRAL AUSTRALIA- AN EXAMPLE OF METASOMATISM AT MID-CRUSTAL LEVELS	CONTRIB. MINERAL. PETROL.	CURRIE, K.L.; KNUTSON, J.; TEMBY, P.A.		-23.68	133.83	0.01	542	1521	2500	NOT GIVEN	METAMORPHIC	UNKNOWN	UNKNOWN	GNEISS	78.34	0.08	11.84	0.22		0.13		0.08	1.13	2.63	4.8	0.05	0.01	0.47							40
CL87-38		GEOROC	10.1007/BF00310736	SELECTIVELY CONTAMINATED MAGMAS OF THE TERTIARY EAST GREENLAND MACRODIKE COMPLEX	CONTRIB. MINERAL. PETROL.	BLICHERT-TOFT, J.; LESHER, C. E.; ROSING, M. T.		68.25	-29.67	0.01	0	32.75	65.5	TIMS_ID	METAMORPHIC	UNKNOWN	UNKNOWN	GNEISS																							21.21	3.839
CL87-38		GEOROC	10.1007/BF00310736	SELECTIVELY CONTAMINATED MAGMAS OF THE TERTIARY EAST GREENLAND MACRODIKE COMPLEX	CONTRIB. MINERAL. PETROL.	BLICHERT-TOFT, J.; LESHER, C. E.; ROSING, M. T.		68.25	-29.67	0.01	0	32.75	65.5	TIMS	METAMORPHIC	UNKNOWN	UNKNOWN	GNEISS
CL87-38		GEOROC	10.1007/BF00310736	SELECTIVELY CONTAMINATED MAGMAS OF THE TERTIARY EAST GREENLAND MACRODIKE COMPLEX	CONTRIB. MINERAL. PETROL.	BLICHERT-TOFT, J.; LESHER, C. E.; ROSING, M. T.		68.25	-29.67	0.01	0	32.75	65.5	MS	METAMORPHIC	UNKNOWN	UNKNOWN	GNEISS
CL87-38		GEOROC	10.1007/BF00310736	SELECTIVELY CONTAMINATED MAGMAS OF THE TERTIARY EAST GREENLAND MACRODIKE COMPLEX	CONTRIB. MINERAL. PETROL.	BLICHERT-TOFT, J.; LESHER, C. E.; ROSING, M. T.		68.25	-29.67	0.01	0	32.75	65.5	DCPAES	METAMORPHIC	UNKNOWN	UNKNOWN	GNEISS	70.9	0.33	15.3		2.69			0.92	3.07	4.5	1.5	0.11	0.04
RL-15-66		GEOROC	10.1016/0016-7037(86)90215-2	MANTLE HETEROGENEITY AND CRUSTAL RECYCLING IN ARCHEAN GRANITE-GREENSTONE BELTS: EVIDENCE FROM ND ISOTOPES AND TRACE ELEMENTS IN THE RAINY LAKE AREA, SUPERIOR PROVINCE, ONTARIO, CANADA	GEOCHIM. COSMOCHIM. ACTA	SHIREY, S. B.; HANSON, G. N.		48.75	-93	0.01				TIMS	METAMORPHIC	UNKNOWN	UNKNOWN	GNEISS
RL-15-66		GEOROC	10.1016/0016-7037(86)90215-2	MANTLE HETEROGENEITY AND CRUSTAL RECYCLING IN ARCHEAN GRANITE-GREENSTONE BELTS: EVIDENCE FROM ND ISOTOPES AND TRACE ELEMENTS IN THE RAINY LAKE AREA, SUPERIOR PROVINCE, ONTARIO, CANADA	GEOCHIM. COSMOCHIM. ACTA	SHIREY, S. B.; HANSON, G. N.		48.75	-93	0.01				XRF	METAMORPHIC	UNKNOWN	UNKNOWN	GNEISS	70.9	0.17	16	0.41		1.43		0.66	3.51	4.93	1.16	0.1	0.03
RL-15-66		GEOROC	10.1016/0016-7037(86)90215-2	MANTLE HETEROGENEITY AND CRUSTAL RECYCLING IN ARCHEAN GRANITE-GREENSTONE BELTS: EVIDENCE FROM ND ISOTOPES AND TRACE ELEMENTS IN THE RAINY LAKE AREA, SUPERIOR PROVINCE, ONTARIO, CANADA	GEOCHIM. COSMOCHIM. ACTA	SHIREY, S. B.; HANSON, G. N.		48.75	-93	0.01				TIMS_ID	METAMORPHIC	UNKNOWN	UNKNOWN	GNEISS																					12.2		6.08	1.26	0.374	0.962		0.736		0.398
RL-15-66		GEOROC	10.1016/0016-7037(86)90215-2	MANTLE HETEROGENEITY AND CRUSTAL RECYCLING IN ARCHEAN GRANITE-GREENSTONE BELTS: EVIDENCE FROM ND ISOTOPES AND TRACE ELEMENTS IN THE RAINY LAKE AREA, SUPERIOR PROVINCE, ONTARIO, CANADA	GEOCHIM. COSMOCHIM. ACTA	SHIREY, S. B.; HANSON, G. N.		48.75	-93	0.01				TIMS	METAMORPHIC	UNKNOWN	UNKNOWN	GNEISS
RL-15-66		GEOROC	10.1016/0016-7037(86)90215-2	MANTLE HETEROGENEITY AND CRUSTAL RECYCLING IN ARCHEAN GRANITE-GREENSTONE BELTS: EVIDENCE FROM ND ISOTOPES AND TRACE ELEMENTS IN THE RAINY LAKE AREA, SUPERIOR PROVINCE, ONTARIO, CANADA	GEOCHIM. COSMOCHIM. ACTA	SHIREY, S. B.; HANSON, G. N.		48.75	-93	0.01				NOT GIVEN	METAMORPHIC	UNKNOWN	UNKNOWN	GNEISS															0.36	0
139D		GEOROC	10.1139/e92-174	AN ISOTOPIC STUDY OF THE ISLAND LAKE GREENSTONE BELT, MANITOBA: CRUSTAL EVOLUTION AND PROGRESSIVE CRATONIZATION IN THE LATE ARCHEAN	CAN. J. EARTH SCI.	STEVENSON, R. K.; TUREK, A.		53.7	-94	0.01	2500	3175	3850	TIMS_ID	METAMORPHIC	UNKNOWN	UNKNOWN	GNEISS																							7.28	1.36
139D		GEOROC	10.1139/e92-174	AN ISOTOPIC STUDY OF THE ISLAND LAKE GREENSTONE BELT, MANITOBA: CRUSTAL EVOLUTION AND PROGRESSIVE CRATONIZATION IN THE LATE ARCHEAN	CAN. J. EARTH SCI.	STEVENSON, R. K.; TUREK, A.		53.7	-94	0.01	2500	3175	3850	TIMS	METAMORPHIC	UNKNOWN	UNKNOWN	GNEISS
B-79-15G		GEOROC	10.1016/j.jvolgeores.2016.05.019	GEOCHRONOLOGIC AND SR-ISOTOPIC STUDIES OF CERTAIN UNITS IN THE BARBERTON GRANITE-GREENSTONE TERRANE, SOUTH AFRICA	SPEC. PUBL. GEOL. SOC. S. AFR.	BARTON, J. M. JR.; ROBB, L. J.; ANHAEUSSER, C. R.; VAN NIEROP, D. A.		-25.8	31	0.01	2500	3175	3850	NOT GIVEN	METAMORPHIC	UNKNOWN	UNKNOWN	GNEISS
OES-99-16		GEOROC	10.1016/S0301-9268(02)00026-8	U-PB GEOCHRONOLOGY AND GEOCHEMISTRY OF EARLY PROTEROZOIC ROCKS OF THE TECTONIC BASEMENT WINDOWS IN CENTRAL NORDLAND, CALEDONIDES OF NORTH-CENTRAL NORWAY	PREC. RESEARCH	SKAR, O.		66	12.5	0.01				XRF	METAMORPHIC	UNKNOWN	UNKNOWN	GNEISS	68.44	0.32	16.15		2.79			0.22	0.92	3.51	6.22	0.04	0.08						90		172		79
OES-99-16		GEOROC	10.1016/S0301-9268(02)00026-8	U-PB GEOCHRONOLOGY AND GEOCHEMISTRY OF EARLY PROTEROZOIC ROCKS OF THE TECTONIC BASEMENT WINDOWS IN CENTRAL NORDLAND, CALEDONIDES OF NORTH-CENTRAL NORWAY	PREC. RESEARCH	SKAR, O.		66	12.5	0.01				IGN	METAMORPHIC	UNKNOWN	UNKNOWN	GNEISS														0.23
619		GEOROC	10.1016/j.gca.2012.01.035	ALONG AND ACROSS ARC GEOCHEMICAL VARIATIONS IN NW CENTRAL AMERICA: EVIDENCE FOR INVOLVEMENT OF LITHOSPHERIC PYROXENITE	GEOCHIM. COSMOCHIM. ACTA	HEYDOLPH, K.; HOERNLE, K. A.; HAUFF, F.; VAN DEN BOGAARD, P.; PORTNYAGIN, M. V.; BINDEMAN, I. N.; GARBE-SCHÖNBERG, D.		15.068	-89.602	0.01				XRF	METAMORPHIC	UNKNOWN	UNKNOWN	GNEISS	68.46	0.46	14.79		4.24			1.56	3.03	3.22	2.93	0.16	0.06
619		GEOROC	10.1016/j.gca.2012.01.035	ALONG AND ACROSS ARC GEOCHEMICAL VARIATIONS IN NW CENTRAL AMERICA: EVIDENCE FOR INVOLVEMENT OF LITHOSPHERIC PYROXENITE	GEOCHIM. COSMOCHIM. ACTA	HEYDOLPH, K.; HOERNLE, K. A.; HAUFF, F.; VAN DEN BOGAARD, P.; PORTNYAGIN, M. V.; BINDEMAN, I. N.; GARBE-SCHÖNBERG, D.		15.068	-89.602	0.01				TIMS	METAMORPHIC	UNKNOWN	UNKNOWN	GNEISS
619		GEOROC	10.1016/j.gca.2012.01.035	ALONG AND ACROSS ARC GEOCHEMICAL VARIATIONS IN NW CENTRAL AMERICA: EVIDENCE FOR INVOLVEMENT OF LITHOSPHERIC PYROXENITE	GEOCHIM. COSMOCHIM. ACTA	HEYDOLPH, K.; HOERNLE, K. A.; HAUFF, F.; VAN DEN BOGAARD, P.; PORTNYAGIN, M. V.; BINDEMAN, I. N.; GARBE-SCHÖNBERG, D.		15.068	-89.602	0.01				MC_ICPMS	METAMORPHIC	UNKNOWN	UNKNOWN	GNEISS
619		GEOROC	10.1016/j.gca.2012.01.035	ALONG AND ACROSS ARC GEOCHEMICAL VARIATIONS IN NW CENTRAL AMERICA: EVIDENCE FOR INVOLVEMENT OF LITHOSPHERIC PYROXENITE	GEOCHIM. COSMOCHIM. ACTA	HEYDOLPH, K.; HOERNLE, K. A.; HAUFF, F.; VAN DEN BOGAARD, P.; PORTNYAGIN, M. V.; BINDEMAN, I. N.; GARBE-SCHÖNBERG, D.		15.068	-89.602	0.01				IRP	METAMORPHIC	UNKNOWN	UNKNOWN	GNEISS																	1.23
619		GEOROC	10.1016/j.gca.2012.01.035	ALONG AND ACROSS ARC GEOCHEMICAL VARIATIONS IN NW CENTRAL AMERICA: EVIDENCE FOR INVOLVEMENT OF LITHOSPHERIC PYROXENITE	GEOCHIM. COSMOCHIM. ACTA	HEYDOLPH, K.; HOERNLE, K. A.; HAUFF, F.; VAN DEN BOGAARD, P.; PORTNYAGIN, M. V.; BINDEMAN, I. N.; GARBE-SCHÖNBERG, D.		15.068	-89.602	0.01				ICPMS	METAMORPHIC	UNKNOWN	UNKNOWN	GNEISS																			31.8		64	7.5	27.6	5.47	0.96	4.96	0.7	3.52	0.59	1.35	0.16
SK5		GEOROC	10.1016/j.lithos.2016.07.020	THE GEOLOGY AND GEOCHEMISTRY OF THE ARCHEAN GRANITES AND GNEISSES OF THE JOHANNESBURG-PRETORIA DOME	SPEC. PUBL. GEOL. SOC. S. AFR.	ANHAEUSSER, C. R.		-26.1	27.85	0.01				XRF	METAMORPHIC	UNKNOWN	UNKNOWN	GNEISS											1.39
SK5		GEOROC	10.1016/j.lithos.2016.07.020	THE GEOLOGY AND GEOCHEMISTRY OF THE ARCHEAN GRANITES AND GNEISSES OF THE JOHANNESBURG-PRETORIA DOME	SPEC. PUBL. GEOL. SOC. S. AFR.	ANHAEUSSER, C. R.		-26.1	27.85	0.01				NOT GIVEN	METAMORPHIC	UNKNOWN	UNKNOWN	GNEISS	66.42	0.41	16.43	0.98		2.27		1.73	4.33	4.61		0.13	0.06		0.95	0.02
76162PS		GEOROC	10.1130/G31123.1	EVIDENCE FROM ZIRCON U-PB AGE SPECTRA FOR CRUSTAL STRUCTURE AND FELSIC MAGMA GENESIS AT TAUPO VOLCANO, NEW ZEALAND	GEOLOGY	CHARLIER, BRUCE L. A.; WILSON, C. J. N.; MORTIMER, N.		-38.7	176.1	0.01				XRF	METAMORPHIC	UNKNOWN	UNKNOWN	GNEISS	69.16	0.62	14.55		4.36			1.45	2.3	3.29	2.86	0.11	0.06	0.51
LL26-3		GEOROC	10.1093/petrology/egs090	THE 2.2-2.1 GA MAGMATIC EVENT AND ITS TECTONIC IMPLICATION IN THE LÜLIANG MOUNTAINS, NORTH CHINA CRATON	ACTA PETROL. SINICA (YANSHI-XUEBAO)	DU, LILIN; YANG, CHONGHUI; REN, LIUDONG; SONG, HUIXIA; GENG, YUANSHENG; WAN, YUSHENG		38	111	0.01	542	1521	2500	NOT GIVEN	METAMORPHIC	UNKNOWN	UNKNOWN	GNEISS	58.32	0.83	19.19	2.53		2.68		1.61	4.31	4.24	5.33	0.31	0.11	0.25	0.34				44.1		91.1	10.4	40.1	6.56	2.46	6.05	0.66	3.9	0.78	2.23	0.26
SCH-1		GEOROC	10.1016/S0016-7037(03)00447-2	NATURE OF THE ARCHEAN MIDCRUST IN THE CORE OF THE VREDEFORT DOME, CENTRAL KAAPVAAL CRATON, SOUTH AFRICA	GEOCHIM. COSMOCHIM. ACTA	LANA, C.; REIMOLD, W. U.; GIBSON, R. L.; KOEBERL, C.; SIEGESMUND, S.		-27	27.2	0.01	2020	2020	2020	XRF	METAMORPHIC	UNKNOWN	UNKNOWN	GNEISS	66.14	0.44	16.25		3.5			0.52	1.91	7.17	3.95	0.19	0.08
SCH-1		GEOROC	10.1016/S0016-7037(03)00447-2	NATURE OF THE ARCHEAN MIDCRUST IN THE CORE OF THE VREDEFORT DOME, CENTRAL KAAPVAAL CRATON, SOUTH AFRICA	GEOCHIM. COSMOCHIM. ACTA	LANA, C.; REIMOLD, W. U.; GIBSON, R. L.; KOEBERL, C.; SIEGESMUND, S.		-27	27.2	0.01	2020	2020	2020	IGN	METAMORPHIC	UNKNOWN	UNKNOWN	GNEISS														0.4
901		GEOROC	10.1016/j.jvolgeores.2010.08.014	MANTLE SOURCE CHARACTERISTICS AND MELTING MODELS FOR THE EARLY-MIDDLE MIOCENE MAFIC VOLCANISM IN WESTERN ANATOLIA: IMPLICATIONS FOR ENRICHMENT PROCESSES OF MANTLE LITHOSPHERE AND ORIGIN OF K-RICH VOLCANISM IN POST-COLLISIONAL SETTINGS	J. VOLCANOL. GEOTHERM. RES.	ERSOY, Y.; HELVACI, C.; PALMER, M. R.		38.45	27.3	0.01				MC_ICPMS	METAMORPHIC	UNKNOWN	UNKNOWN	GNEISS
B-79-13B		GEOROC	10.1016/S0009-2541(03)00082-2	GEOCHRONOLOGIC AND SR-ISOTOPIC STUDIES OF CERTAIN UNITS IN THE BARBERTON GRANITE-GREENSTONE TERRANE, SOUTH AFRICA	SPEC. PUBL. GEOL. SOC. S. AFR.	BARTON, J. M. JR.; ROBB, L. J.; ANHAEUSSER, C. R.; VAN NIEROP, D. A.		-26.1	31	0.01	2500	3175	3850	NOT GIVEN	METAMORPHIC	UNKNOWN	UNKNOWN	GNEISS
NW		GEOROC	10.1016/j.jseaes.2008.06.001	THE GEOLOGY AND GEOCHEMISTRY OF THE NELSHOOGTE SCHIST BELT AND ADJACENT STOLZBURG LAYERED ULTRAMAFIC COMPLEX, BARBERTON GREENSTONE BELT, SOUTH AFRICA	UNIV. WITWATERSRAND ECON. GEOL. RES. INF. CIRC.	ANHAEUSSER, C. R.		-25.8	31	0.01	2500	3175	3850	NOT GIVEN	METAMORPHIC	UNKNOWN	UNKNOWN	GNEISS	66.55	0.44	15.92	0.43		2.17		1.93	3.89	4.68	0.98	0.16	0.08	1.56
CHENCAI		GEOROC	10.1111/j.1755-6724.1999.tb00814.x	SOURCES OF CRETACEOUS BIMODAL VOLCANIC ROCKS IN THE COASTAL REGION OF SOUTHEASTERN CHINA	ACTA GEOL. SINICA (DIZHI-XUEBAO)	XING, GUANGFU; YANG, ZHULIANG; TAO, KUIYUAN		29.58	120.38	0.01	542	1521	2500	NOT GIVEN	METAMORPHIC	UNKNOWN	UNKNOWN	GNEISS																							23.95	4.65
266-70		GEOROC	10.1016/j.gr.2009.09.001	ROLE OF THE OLLO DE SAPO MASSIVE FELSIC VOLCANISM OF NW IBERIA IN THE EARLY ORDOVICIAN DYNAMICS OF NORTHERN GONDWANA	GONDWANA RES.	DIEZ MONTES, A.; MARTINEZ CATALAN, J. R.; MULAS, F. B.		42.05	-6.63	0.01	472	480	488	NOT GIVEN	METAMORPHIC	UNKNOWN	UNKNOWN	GNEISS	68.06	0.54	16.12		4.06			1.37	1.49	2.93	3.81	0.2	0.05	1.18					24.31		51.5	5.97	26.08	4.15	0.85	4.43		4.22		2.59
278752		GEOROC	10.1130/B30790.1	ACCRETION AND EVOLUTION OF AN ARCHEAN HIGH-GRADE GREY GNEISS-AMPHIBOLITE COMPLEX: THE FISKEFJORD AREA, SOUTHERN WEST GREENLAND	BULL. GEOL. GREENLAND SURV.	GARDE, A. A.		64.929	-51.2852	0.01	2500	3175	3850	XRF	METAMORPHIC	UNKNOWN	UNKNOWN	GNEISS	61.39	0.6	14.86				5.72	4.7	4.79		1.59	0.13	0.09						23		47		26
278752		GEOROC	10.1130/B30790.1	ACCRETION AND EVOLUTION OF AN ARCHEAN HIGH-GRADE GREY GNEISS-AMPHIBOLITE COMPLEX: THE FISKEFJORD AREA, SOUTHERN WEST GREENLAND	BULL. GEOL. GREENLAND SURV.	GARDE, A. A.		64.929	-51.2852	0.01	2500	3175	3850	TIT	METAMORPHIC	UNKNOWN	UNKNOWN	GNEISS				1.78		4.12
278752		GEOROC	10.1130/B30790.1	ACCRETION AND EVOLUTION OF AN ARCHEAN HIGH-GRADE GREY GNEISS-AMPHIBOLITE COMPLEX: THE FISKEFJORD AREA, SOUTHERN WEST GREENLAND	BULL. GEOL. GREENLAND SURV.	GARDE, A. A.		64.929	-51.2852	0.01	2500	3175	3850	INAA	METAMORPHIC	UNKNOWN	UNKNOWN	GNEISS																			21.5		43		23	4.64	0.9		0.7
278752		GEOROC	10.1130/B30790.1	ACCRETION AND EVOLUTION OF AN ARCHEAN HIGH-GRADE GREY GNEISS-AMPHIBOLITE COMPLEX: THE FISKEFJORD AREA, SOUTHERN WEST GREENLAND	BULL. GEOL. GREENLAND SURV.	GARDE, A. A.		64.929	-51.2852	0.01	2500	3175	3850	IGN	METAMORPHIC	UNKNOWN	UNKNOWN	GNEISS														1.33
278752		GEOROC	10.1130/B30790.1	ACCRETION AND EVOLUTION OF AN ARCHEAN HIGH-GRADE GREY GNEISS-AMPHIBOLITE COMPLEX: THE FISKEFJORD AREA, SOUTHERN WEST GREENLAND	BULL. GEOL. GREENLAND SURV.	GARDE, A. A.		64.929	-51.2852	0.01	2500	3175	3850	AAS	METAMORPHIC	UNKNOWN	UNKNOWN	GNEISS										3.5
GR-P		GEOROC	10.1016/0024-4937(87)90010-7	THE NATURE OF THE LITHOSPHERE BENEATH THE SARDINIAN CONTINENTAL BLOCK: MANTLE AND DEEP CRUSTAL INCLUSIONS IN MAFIC ALKALINE LAVAS	LITHOS	RUTTER, E. H.		40.4	8.65	0.01				ICPAES	METAMORPHIC	UNKNOWN	UNKNOWN	GNEISS																			0.8		1.1	0.09	0.75	0.22	0.11			0.17	0.05	0.13
195JTL 96-3		GEOROC	10.2465/ganko.86.72	ARCHEAN EVOLUTION OF THE TIPASJÄRVI-KUHMO-SUOMUSSALMI GREENSTONE COMPLEX, FINLAND	BULL. GEOL. SURV. FINLAND	PAPUNEN, H.; HALKOAHO, T.; LUUKKONEN, E:		63.8417	28.9133	0.01	2500	3175	3850	XRF	METAMORPHIC	UNKNOWN	UNKNOWN	GNEISS	73.2	0.166	15.1				1.79	0.85	0.88	5.4	2.11	0.072	0.04
195JTL 96-3		GEOROC	10.2465/ganko.86.72	ARCHEAN EVOLUTION OF THE TIPASJÄRVI-KUHMO-SUOMUSSALMI GREENSTONE COMPLEX, FINLAND	BULL. GEOL. SURV. FINLAND	PAPUNEN, H.; HALKOAHO, T.; LUUKKONEN, E:		63.8417	28.9133	0.01	2500	3175	3850	NOT GIVEN	METAMORPHIC	UNKNOWN	UNKNOWN	GNEISS																			10		30
195JTL 96-3		GEOROC	10.2465/ganko.86.72	ARCHEAN EVOLUTION OF THE TIPASJÄRVI-KUHMO-SUOMUSSALMI GREENSTONE COMPLEX, FINLAND	BULL. GEOL. SURV. FINLAND	PAPUNEN, H.; HALKOAHO, T.; LUUKKONEN, E:		63.8417	28.9133	0.01	2500	3175	3850	IGN	METAMORPHIC	UNKNOWN	UNKNOWN	GNEISS														0
B-77-38A		GEOROC	10.2465/ganko1941.46.73	GEOCHRONOLOGIC AND SR-ISOTOPIC STUDIES OF CERTAIN UNITS IN THE BARBERTON GRANITE-GREENSTONE TERRANE, SOUTH AFRICA	SPEC. PUBL. GEOL. SOC. S. AFR.	BARTON, J. M. JR.; ROBB, L. J.; ANHAEUSSER, C. R.; VAN NIEROP, D. A.		-26	31	0.01	2500	3175	3850	NOT GIVEN	METAMORPHIC	UNKNOWN	UNKNOWN	GNEISS
OES-99-10		GEOROC	10.1016/S0301-9268(02)00026-8	U-PB GEOCHRONOLOGY AND GEOCHEMISTRY OF EARLY PROTEROZOIC ROCKS OF THE TECTONIC BASEMENT WINDOWS IN CENTRAL NORDLAND, CALEDONIDES OF NORTH-CENTRAL NORWAY	PREC. RESEARCH	SKAR, O.		66	12.5	0.01				XRF	METAMORPHIC	UNKNOWN	UNKNOWN	GNEISS	65.82	0.81	14.84		6.19			0.86	2.39	2.73	4.87	0.24	0.11						67		140		56
OES-99-10		GEOROC	10.1016/S0301-9268(02)00026-8	U-PB GEOCHRONOLOGY AND GEOCHEMISTRY OF EARLY PROTEROZOIC ROCKS OF THE TECTONIC BASEMENT WINDOWS IN CENTRAL NORDLAND, CALEDONIDES OF NORTH-CENTRAL NORWAY	PREC. RESEARCH	SKAR, O.		66	12.5	0.01				IGN	METAMORPHIC	UNKNOWN	UNKNOWN	GNEISS														0.25
B-80-1F		GEOROC	10.1016/j.precamres.2003.12.017	GEOCHRONOLOGIC AND SR-ISOTOPIC STUDIES OF CERTAIN UNITS IN THE BARBERTON GRANITE-GREENSTONE TERRANE, SOUTH AFRICA	SPEC. PUBL. GEOL. SOC. S. AFR.	BARTON, J. M. JR.; ROBB, L. J.; ANHAEUSSER, C. R.; VAN NIEROP, D. A.		-26	31	0.01	2500	3175	3850	NOT GIVEN	METAMORPHIC	UNKNOWN	UNKNOWN	GNEISS
SCH-2		GEOROC	10.1016/S0016-7037(03)00447-2	NATURE OF THE ARCHEAN MIDCRUST IN THE CORE OF THE VREDEFORT DOME, CENTRAL KAAPVAAL CRATON, SOUTH AFRICA	GEOCHIM. COSMOCHIM. ACTA	LANA, C.; REIMOLD, W. U.; GIBSON, R. L.; KOEBERL, C.; SIEGESMUND, S.		-27	27.2	0.01	2020	2020	2020	XRF	METAMORPHIC	UNKNOWN	UNKNOWN	GNEISS	67.74	0.43	16.05		2.8			0.46	1.89	6.85	3.94	0.19	0.08
SCH-2		GEOROC	10.1016/S0016-7037(03)00447-2	NATURE OF THE ARCHEAN MIDCRUST IN THE CORE OF THE VREDEFORT DOME, CENTRAL KAAPVAAL CRATON, SOUTH AFRICA	GEOCHIM. COSMOCHIM. ACTA	LANA, C.; REIMOLD, W. U.; GIBSON, R. L.; KOEBERL, C.; SIEGESMUND, S.		-27	27.2	0.01	2020	2020	2020	INAA	METAMORPHIC	UNKNOWN	UNKNOWN	GNEISS																			201		353		140	18.6	4.41	20.1	1.89				0.61
SCH-2		GEOROC	10.1016/S0016-7037(03)00447-2	NATURE OF THE ARCHEAN MIDCRUST IN THE CORE OF THE VREDEFORT DOME, CENTRAL KAAPVAAL CRATON, SOUTH AFRICA	GEOCHIM. COSMOCHIM. ACTA	LANA, C.; REIMOLD, W. U.; GIBSON, R. L.; KOEBERL, C.; SIEGESMUND, S.		-27	27.2	0.01	2020	2020	2020	IGN	METAMORPHIC	UNKNOWN	UNKNOWN	GNEISS														0.4
B-77-38H		GEOROC	10.1127/0077-7757/2005/0181-0007	GEOCHRONOLOGIC AND SR-ISOTOPIC STUDIES OF CERTAIN UNITS IN THE BARBERTON GRANITE-GREENSTONE TERRANE, SOUTH AFRICA	SPEC. PUBL. GEOL. SOC. S. AFR.	BARTON, J. M. JR.; ROBB, L. J.; ANHAEUSSER, C. R.; VAN NIEROP, D. A.		-26	31	0.01	2500	3175	3850	NOT GIVEN	METAMORPHIC	UNKNOWN	UNKNOWN	GNEISS
LLP-1-85		GEOROC	10.1007/BF00399363	ND-SR ISOTOPE COMPOSITION OF THE LOWER CRUSTAL XENOLITHS, EVIDENCE FOR THE ORIGIN OF MID-TERTIARY FELSIC VOLCANICS IN MEXICO	CONTRIB. MINERAL. PETROL.	RUIZ, J.; PATCHETT, P. J.; ARCULUS, R. J.		22.95	-100.225	0.01				XRF	METAMORPHIC	UNKNOWN	UNKNOWN	GNEISS	56.8	0.96	17.8		7.74			4.34	7.69	3.17	1.59	0.19	0.12
LLP-1-85		GEOROC	10.1007/BF00399363	ND-SR ISOTOPE COMPOSITION OF THE LOWER CRUSTAL XENOLITHS, EVIDENCE FOR THE ORIGIN OF MID-TERTIARY FELSIC VOLCANICS IN MEXICO	CONTRIB. MINERAL. PETROL.	RUIZ, J.; PATCHETT, P. J.; ARCULUS, R. J.		22.95	-100.225	0.01				TIMS_ID	METAMORPHIC	UNKNOWN	UNKNOWN	GNEISS
LLP-1-85		GEOROC	10.1007/BF00399363	ND-SR ISOTOPE COMPOSITION OF THE LOWER CRUSTAL XENOLITHS, EVIDENCE FOR THE ORIGIN OF MID-TERTIARY FELSIC VOLCANICS IN MEXICO	CONTRIB. MINERAL. PETROL.	RUIZ, J.; PATCHETT, P. J.; ARCULUS, R. J.		22.95	-100.225	0.01				TIMS	METAMORPHIC	UNKNOWN	UNKNOWN	GNEISS
PC-227		GEOROC	10.1093/petrology/egr014	IMPLICATIONS OF THE NUVVUAGITTUQ GREENSTONE BELT FOR THE FORMATION OF EARTHS EARLY CRUST	J. PETROL.	O^NEIL, J.; FRANCIS, D. M.; CARLSON, R. W.		58	-77	0.01				XRF	METAMORPHIC	UNKNOWN	UNKNOWN	GNEISS	53.95	0.294	14.56				9.75394	11.35	6.58	0.83	0.6	0.062	0.218
PC-227		GEOROC	10.1093/petrology/egr014	IMPLICATIONS OF THE NUVVUAGITTUQ GREENSTONE BELT FOR THE FORMATION OF EARTHS EARLY CRUST	J. PETROL.	O^NEIL, J.; FRANCIS, D. M.; CARLSON, R. W.		58	-77	0.01				IGN	METAMORPHIC	UNKNOWN	UNKNOWN	GNEISS														1.82
PC-227		GEOROC	10.1093/petrology/egr014	IMPLICATIONS OF THE NUVVUAGITTUQ GREENSTONE BELT FOR THE FORMATION OF EARTHS EARLY CRUST	J. PETROL.	O^NEIL, J.; FRANCIS, D. M.; CARLSON, R. W.		58	-77	0.01				ICPMS	METAMORPHIC	UNKNOWN	UNKNOWN	GNEISS																			1.89		4.02	0.56	2.84	0.87	0.324	1.42	0.31	2.2	0.5	1.63	0.255
A89-1		GEOROC	10.1007/BF01132327	A 3500 MA PLUTONIC AND VOLCANIC CALC-ALKALINE PROVINCE IN THE ARCHEAN EAST PILBARA BLOCK	CONTRIB. MINERAL. PETROL.	BICKLE, M. J.; BETTENAY, M. E.; BARLEY, M. E.; CHAPMAN, N. A.; GROVES, D. I.; CAMPBELL, I. H.; DE LAETER, J. R.		-21.25	119.25	0.01	3500	3500	3500	TIMS	METAMORPHIC	UNKNOWN	UNKNOWN	GNEISS
3323		GEOROC	10.1016/0016-7037(80)90201-X	U-PB AND RB-SR SYSTEMATICS OF THE SUOMUSSALMI ARCHEAN GREENSTONE BELT (EASTERN FINLAND)	GEOCHIM. COSMOCHIM. ACTA	VIDAL, P.; BLAIS, S.; JAHN, B.-M.; CAPDEVILA, R.; TILTON, G. R.		64.5	29.75	0.01	2550	2680	2810	TIMS_ID	METAMORPHIC	UNKNOWN	UNKNOWN	GNEISS
3323		GEOROC	10.1016/0016-7037(80)90201-X	U-PB AND RB-SR SYSTEMATICS OF THE SUOMUSSALMI ARCHEAN GREENSTONE BELT (EASTERN FINLAND)	GEOCHIM. COSMOCHIM. ACTA	VIDAL, P.; BLAIS, S.; JAHN, B.-M.; CAPDEVILA, R.; TILTON, G. R.		64.5	29.75	0.01	2550	2680	2810	TIMS	METAMORPHIC	UNKNOWN	UNKNOWN	GNEISS
3323		GEOROC	10.1016/0016-7037(80)90201-X	U-PB AND RB-SR SYSTEMATICS OF THE SUOMUSSALMI ARCHEAN GREENSTONE BELT (EASTERN FINLAND)	GEOCHIM. COSMOCHIM. ACTA	VIDAL, P.; BLAIS, S.; JAHN, B.-M.; CAPDEVILA, R.; TILTON, G. R.		64.5	29.75	0.01	2550	2680	2810	TIMS_ID	METAMORPHIC	UNKNOWN	UNKNOWN	GNEISS
3323		GEOROC	10.1016/0016-7037(80)90201-X	U-PB AND RB-SR SYSTEMATICS OF THE SUOMUSSALMI ARCHEAN GREENSTONE BELT (EASTERN FINLAND)	GEOCHIM. COSMOCHIM. ACTA	VIDAL, P.; BLAIS, S.; JAHN, B.-M.; CAPDEVILA, R.; TILTON, G. R.		64.5	29.75	0.01	2550	2680	2810	TIMS	METAMORPHIC	UNKNOWN	UNKNOWN	GNEISS
3323		GEOROC	10.1016/0016-7037(80)90201-X	U-PB AND RB-SR SYSTEMATICS OF THE SUOMUSSALMI ARCHEAN GREENSTONE BELT (EASTERN FINLAND)	GEOCHIM. COSMOCHIM. ACTA	VIDAL, P.; BLAIS, S.; JAHN, B.-M.; CAPDEVILA, R.; TILTON, G. R.		64.5	29.75	0.01	2550	2680	2810	TIMS	METAMORPHIC	UNKNOWN	UNKNOWN	GNEISS
126		GEOROC	10.1080/00288306.1973.10421585	ISOTOPIC COMPOSITION OF STRONTIUM AND GEOLOGIC HISTORY OF THE BASEMENT ROCKS OF WRIGHT VALLEY, SOUTHERN VICTORIA LAND, ANTARCTICA	NEW ZEALAND J. GEOL. GEOPHYS.	FAURE, G.; JONES, L. M.; OWEN, L. B.		-77.27	161.25	0.01	488	494.5	501	TIMS_ID	METAMORPHIC	UNKNOWN	UNKNOWN	GNEISS
126		GEOROC	10.1080/00288306.1973.10421585	ISOTOPIC COMPOSITION OF STRONTIUM AND GEOLOGIC HISTORY OF THE BASEMENT ROCKS OF WRIGHT VALLEY, SOUTHERN VICTORIA LAND, ANTARCTICA	NEW ZEALAND J. GEOL. GEOPHYS.	FAURE, G.; JONES, L. M.; OWEN, L. B.		-77.27	161.25	0.01	488	494.5	501	TIMS	METAMORPHIC	UNKNOWN	UNKNOWN	GNEISS
AM470802-11		GEOROC	10.1016/j.jseaes.2013.07.031	REGIONAL METAMORPHISM OF THE GOSAISYO-TAKANUKI DISTRICT IN THE CENTRAL ABUKUMA PLATEAU	J. FAC. SCI., UNIV. TOKYO, SECT. 2, GEOL. MINERAL. GEOGR. GEOPHYS.	MIYASHIRO, A.		36.92	140.5	0.01				NOT GIVEN	METAMORPHIC	UNKNOWN	UNKNOWN	GNEISS	89.93	0.12	4.38	0.32		1.34		0.52	0.41	0.39	2.01	0.1	0.04		0.45	0.1
IC 427		GEOROC	10.1139/e89-097	LATE PROTEROZOIC ARC-CONTINENT- CONTINENT COLLISION IN THE PAN-AFRICAN TRANS-SAHARAN BELT OF MALI	CAN. J. EARTH SCI.	CABY, R.; ANDREOPOULOS-RENAUD, U.; PIN, C.		20	1	0.01	542	1521	2500	XRF	METAMORPHIC	UNKNOWN	UNKNOWN	GNEISS
IC 427		GEOROC	10.1139/e89-097	LATE PROTEROZOIC ARC-CONTINENT- CONTINENT COLLISION IN THE PAN-AFRICAN TRANS-SAHARAN BELT OF MALI	CAN. J. EARTH SCI.	CABY, R.; ANDREOPOULOS-RENAUD, U.; PIN, C.		20	1	0.01	542	1521	2500	TIMS_ID	METAMORPHIC	UNKNOWN	UNKNOWN	GNEISS																							22.69	6.736
IC 427		GEOROC	10.1139/e89-097	LATE PROTEROZOIC ARC-CONTINENT- CONTINENT COLLISION IN THE PAN-AFRICAN TRANS-SAHARAN BELT OF MALI	CAN. J. EARTH SCI.	CABY, R.; ANDREOPOULOS-RENAUD, U.; PIN, C.		20	1	0.01	542	1521	2500	TIMS	METAMORPHIC	UNKNOWN	UNKNOWN	GNEISS
511103		GEOROC	10.1016/j.precamres.2013.07.013	ARCHAEAN ANDESITE PETROGENESIS: INSIGHTS FROM THE GRAEDEFJORD SUPRACRUSTAL BELT, SOUTHERN WEST GREENLAND	PREC. RESEARCH	SZILAS, K.; HOFFMANN, J. E.; SCHERSTEN, A.; KOKFELT, T. F.; MÜNKER, C.		63.1222	-50.6194	0.01				IGN	METAMORPHIC	UNKNOWN	UNKNOWN	GNEISS														0.8
511103		GEOROC	10.1016/j.precamres.2013.07.013	ARCHAEAN ANDESITE PETROGENESIS: INSIGHTS FROM THE GRAEDEFJORD SUPRACRUSTAL BELT, SOUTHERN WEST GREENLAND	PREC. RESEARCH	SZILAS, K.; HOFFMANN, J. E.; SCHERSTEN, A.; KOKFELT, T. F.; MÜNKER, C.		63.1222	-50.6194	0.01				ICPMS	METAMORPHIC	UNKNOWN	UNKNOWN	GNEISS																			43.9		82.7	8.69	30.1	4.3	0.79	2.62	0.34	1.28	0.2	0.4	0.08
511103		GEOROC	10.1016/j.precamres.2013.07.013	ARCHAEAN ANDESITE PETROGENESIS: INSIGHTS FROM THE GRAEDEFJORD SUPRACRUSTAL BELT, SOUTHERN WEST GREENLAND	PREC. RESEARCH	SZILAS, K.; HOFFMANN, J. E.; SCHERSTEN, A.; KOKFELT, T. F.; MÜNKER, C.		63.1222	-50.6194	0.01				ICPAES	METAMORPHIC	UNKNOWN	UNKNOWN	GNEISS	73.44	0.07	14.76		0.66			0.24	1.57	3.28	4.99	0.04	0.01					0.002
GR04033		GEOROC	10.1016/j.gca.2006.05.014	CHEMICAL AND ISOTOPIC EVIDENCE FOR WIDESPREAD EOARCHEAN METASEDIMENTARY ENCLAVES IN SOUTHERN WEST GREENLAND	GEOCHIM. COSMOCHIM. ACTA	CATES, N. L.; MOJZSIS, S. J.		63.8367	-51.6917	0.01				NOT GIVEN	METAMORPHIC	UNKNOWN	UNKNOWN	GNEISS	65.17	0.48	16.61		4.15			1.51	6.2	4.28	0.57	0.21	0.11	0.46					14		35	5	23	5	1.4	3.8	0.53	2.9	0.54	1.5	0.22
VDA 9903F		GEOROC	10.1016/S0301-9268(03)00084-6	DERIVATION OF THE 1.0-0.9 GA FERRO-POTASSIC A-TYPE GRANITOIDS OF SOUTHERN NORWAY BY EXTREME DIFFERENTIATION FROM BASIC MAGMAS	PREC. RESEARCH	VANDER AUWERA, J.; BOGAERTS, M.; LIEGEOIS, J.-P.; DEMAIFFE, D.; WILMART, E.; BOLLE, OL; DUCHESNE, J.-C.		58.5	6.5	0.01	542	1521	2500	XRF/TIT	METAMORPHIC	UNKNOWN	UNKNOWN	GNEISS	49.8	1.9	13.88	15.22				5.9	8.54	3.15	0.83	0.2	0.25
VDA 9903F		GEOROC	10.1016/S0301-9268(03)00084-6	DERIVATION OF THE 1.0-0.9 GA FERRO-POTASSIC A-TYPE GRANITOIDS OF SOUTHERN NORWAY BY EXTREME DIFFERENTIATION FROM BASIC MAGMAS	PREC. RESEARCH	VANDER AUWERA, J.; BOGAERTS, M.; LIEGEOIS, J.-P.; DEMAIFFE, D.; WILMART, E.; BOLLE, OL; DUCHESNE, J.-C.		58.5	6.5	0.01	542	1521	2500	XRF/ICPMS/INAA	METAMORPHIC	UNKNOWN	UNKNOWN	GNEISS																			38		104	13	53	13	2.3	12	2.19	14		8.08	1.26
VDA 9903F		GEOROC	10.1016/S0301-9268(03)00084-6	DERIVATION OF THE 1.0-0.9 GA FERRO-POTASSIC A-TYPE GRANITOIDS OF SOUTHERN NORWAY BY EXTREME DIFFERENTIATION FROM BASIC MAGMAS	PREC. RESEARCH	VANDER AUWERA, J.; BOGAERTS, M.; LIEGEOIS, J.-P.; DEMAIFFE, D.; WILMART, E.; BOLLE, OL; DUCHESNE, J.-C.		58.5	6.5	0.01	542	1521	2500	TIMS	METAMORPHIC	UNKNOWN	UNKNOWN	GNEISS
RP7		GEOROC	10.1144/GSL.SP.1992.068.01.14	THE GEOLOGY AND GEOCHEMISTRY OF THE ARCHEAN GRANITES AND GNEISSES OF THE JOHANNESBURG-PRETORIA DOME	SPEC. PUBL. GEOL. SOC. S. AFR.	ANHAEUSSER, C. R.		-26.1	27.85	0.01				XRF	METAMORPHIC	UNKNOWN	UNKNOWN	GNEISS											2.24
RP7		GEOROC	10.1144/GSL.SP.1992.068.01.14	THE GEOLOGY AND GEOCHEMISTRY OF THE ARCHEAN GRANITES AND GNEISSES OF THE JOHANNESBURG-PRETORIA DOME	SPEC. PUBL. GEOL. SOC. S. AFR.	ANHAEUSSER, C. R.		-26.1	27.85	0.01				NOT GIVEN	METAMORPHIC	UNKNOWN	UNKNOWN	GNEISS	60.79	0.58	15.99	1.54		3.59		3.52	5.27	4.23		0.28	0.11		1.69	0.09
PC-404		GEOROC	10.1093/petrology/egr014	IMPLICATIONS OF THE NUVVUAGITTUQ GREENSTONE BELT FOR THE FORMATION OF EARTHS EARLY CRUST	J. PETROL.	O^NEIL, J.; FRANCIS, D. M.; CARLSON, R. W.		58	-77	0.01				XRF	METAMORPHIC	UNKNOWN	UNKNOWN	GNEISS	47.78	0.403	17.3				13.2002	10.45	2.72	0.66	1.16	0.016	0.164
PC-404		GEOROC	10.1093/petrology/egr014	IMPLICATIONS OF THE NUVVUAGITTUQ GREENSTONE BELT FOR THE FORMATION OF EARTHS EARLY CRUST	J. PETROL.	O^NEIL, J.; FRANCIS, D. M.; CARLSON, R. W.		58	-77	0.01				IGN	METAMORPHIC	UNKNOWN	UNKNOWN	GNEISS														5.07
KN5		GEOROC	10.1016/j.precamres.2006.05.006	ISOTOPIC AND GEOCHEMICAL EVIDENCE OF PROTEROZOIC EPISODIC CRUSTAL REWORKING WITHIN THE IRUMIDE BELT OF SOUTH-CENTRAL AFRICA, THE SOUTHERN METACRATONIC BOUNDARY OF AN ARCHAEAN BANGWEULU CRATON	PREC. RESEARCH	DE WAELE, B.; LIEGEOIS, J.-P.; NEMCHIN, A. A.; TEMBO, F.		-11	27	0.01	542	1521	2500	ICPOES	METAMORPHIC	UNKNOWN	UNKNOWN	GNEISS	68.8	1.05	13.8		5.24			1.31	2.96	2.64	3.31	0.1
KN5		GEOROC	10.1016/j.precamres.2006.05.006	ISOTOPIC AND GEOCHEMICAL EVIDENCE OF PROTEROZOIC EPISODIC CRUSTAL REWORKING WITHIN THE IRUMIDE BELT OF SOUTH-CENTRAL AFRICA, THE SOUTHERN METACRATONIC BOUNDARY OF AN ARCHAEAN BANGWEULU CRATON	PREC. RESEARCH	DE WAELE, B.; LIEGEOIS, J.-P.; NEMCHIN, A. A.; TEMBO, F.		-11	27	0.01	542	1521	2500	ICPMS	METAMORPHIC	UNKNOWN	UNKNOWN	GNEISS																			44		108	9.58	35.6	7.94	1.52	6.06	1.14	5.37	0.97	2.8	0.5
MIN2B		GEOROC	10.1093/petrology/egi044	GEOCHRONOLOGY AND PETROGENESIS OF THE CRETACEOUS ANTAMPOMBATO-AMBATOVY COMPLEX AND ASSOCIATED DYKE SWARM, MADAGASCAR	J. PETROL.	MELLUSO, L.; MORRA, V.; BROTZU, P.; TOMMASINI, S.; RENNA, M. R.; DUNCAN, R. A.; FRANCIOSI, L.; D^AMELIO, F.		-18.85	48.3	0.01	542	1521	2500	XRF	METAMORPHIC	UNKNOWN	UNKNOWN	GNEISS	78.69	0.34	12.48		3.16			0.72	1.18	3.34	3.8	0.07	0.02
MIN2B		GEOROC	10.1093/petrology/egi044	GEOCHRONOLOGY AND PETROGENESIS OF THE CRETACEOUS ANTAMPOMBATO-AMBATOVY COMPLEX AND ASSOCIATED DYKE SWARM, MADAGASCAR	J. PETROL.	MELLUSO, L.; MORRA, V.; BROTZU, P.; TOMMASINI, S.; RENNA, M. R.; DUNCAN, R. A.; FRANCIOSI, L.; D^AMELIO, F.		-18.85	48.3	0.01	542	1521	2500	TIMS_ID	METAMORPHIC	UNKNOWN	UNKNOWN	GNEISS
MIN2B		GEOROC	10.1093/petrology/egi044	GEOCHRONOLOGY AND PETROGENESIS OF THE CRETACEOUS ANTAMPOMBATO-AMBATOVY COMPLEX AND ASSOCIATED DYKE SWARM, MADAGASCAR	J. PETROL.	MELLUSO, L.; MORRA, V.; BROTZU, P.; TOMMASINI, S.; RENNA, M. R.; DUNCAN, R. A.; FRANCIOSI, L.; D^AMELIO, F.		-18.85	48.3	0.01	542	1521	2500	TIMS	METAMORPHIC	UNKNOWN	UNKNOWN	GNEISS
MIN2B		GEOROC	10.1093/petrology/egi044	GEOCHRONOLOGY AND PETROGENESIS OF THE CRETACEOUS ANTAMPOMBATO-AMBATOVY COMPLEX AND ASSOCIATED DYKE SWARM, MADAGASCAR	J. PETROL.	MELLUSO, L.; MORRA, V.; BROTZU, P.; TOMMASINI, S.; RENNA, M. R.; DUNCAN, R. A.; FRANCIOSI, L.; D^AMELIO, F.		-18.85	48.3	0.01	542	1521	2500	IGN	METAMORPHIC	UNKNOWN	UNKNOWN	GNEISS														0.48
XC1		GEOROC	10.1016/j.lithos.2004.09.027	MANTLE DIVERSITY BENEATH THE COLOMBIAN ANDES, NORTHERN VOLCANIC ZONE: CONSTRAINTS FROM SR AND ND ISOTOPES	LITHOS	RODRIGUEZ-VARGAS, A.; KOESTER, E.; MALLMANN, G.; CONCEICAO, R. V.; KAWASHITA, K.; WEBER, M. B. I.		1.6	-76.5	0.01				XRF	METAMORPHIC	UNKNOWN	UNKNOWN	GNEISS	52.02	0.46	19.05		6.91			5.24	8.9	4.99	0.45	0.35	0.12	0.96					36		65		39.2	7.9
XC1		GEOROC	10.1016/j.lithos.2004.09.027	MANTLE DIVERSITY BENEATH THE COLOMBIAN ANDES, NORTHERN VOLCANIC ZONE: CONSTRAINTS FROM SR AND ND ISOTOPES	LITHOS	RODRIGUEZ-VARGAS, A.; KOESTER, E.; MALLMANN, G.; CONCEICAO, R. V.; KAWASHITA, K.; WEBER, M. B. I.		1.6	-76.5	0.01				TIMS	METAMORPHIC	UNKNOWN	UNKNOWN	GNEISS																							39.2	7.9
C 86-20		GEOROC	10.1016/S0040-1951(00)00060-3	ND ISOTOPIC EVIDENCE FOR EARLY TO LATE ARCHEAN (3.4-2.7 GA) CRUSTAL GROWTH IN THE WESTERN SUPERIOR PROVINCE (ONTARIO, CANADA)	TECTONOPHYSICS	HENRY, P.; STEVENSON, R. K.; LARBI, Y.; GARIEPY, C.		51.4	-89.9	0.01	2821	2821	2821	TIMS_ID	METAMORPHIC	UNKNOWN	UNKNOWN	GNEISS																							2.78	0.75
C 86-20		GEOROC	10.1016/S0040-1951(00)00060-3	ND ISOTOPIC EVIDENCE FOR EARLY TO LATE ARCHEAN (3.4-2.7 GA) CRUSTAL GROWTH IN THE WESTERN SUPERIOR PROVINCE (ONTARIO, CANADA)	TECTONOPHYSICS	HENRY, P.; STEVENSON, R. K.; LARBI, Y.; GARIEPY, C.		51.4	-89.9	0.01	2821	2821	2821	TIMS	METAMORPHIC	UNKNOWN	UNKNOWN	GNEISS
XAYA-48		GEOROC	10.1016/j.tecto.2008.01.010	ORDOVICIAN-EARLIEST SILURIAN RIFT THOLEIITES IN THE ACATLÁN COMPLEX, SOUTHERN MEXICO: EVIDENCE OF RIFTING ON THE SOUTHERN MARGIN OF THE RHEIC OCEAN	TECTONOPHYSICS	KEPPIE, J. D.; DOSTAL, J.; MILLER, B. V.; RAMOS-ARIAS, M. A.; MORALES-GAMEZ, M.; NANCE, R. D.; MURPHY, J. B.; ORTEGA-RIVERA, A.; LEE, J. W. K.; COOPER, P.		18.25	-98	0.01	251	396.5	542	XRF	METAMORPHIC	UNKNOWN	UNKNOWN	GNEISS	48.33	0.66	15.06		9.78			10.97	8.78	0.75	3.36	0.13	0.16
XAYA-48		GEOROC	10.1016/j.tecto.2008.01.010	ORDOVICIAN-EARLIEST SILURIAN RIFT THOLEIITES IN THE ACATLÁN COMPLEX, SOUTHERN MEXICO: EVIDENCE OF RIFTING ON THE SOUTHERN MARGIN OF THE RHEIC OCEAN	TECTONOPHYSICS	KEPPIE, J. D.; DOSTAL, J.; MILLER, B. V.; RAMOS-ARIAS, M. A.; MORALES-GAMEZ, M.; NANCE, R. D.; MURPHY, J. B.; ORTEGA-RIVERA, A.; LEE, J. W. K.; COOPER, P.		18.25	-98	0.01	251	396.5	542	IGN	METAMORPHIC	UNKNOWN	UNKNOWN	GNEISS														2.79
XAYA-48		GEOROC	10.1016/j.tecto.2008.01.010	ORDOVICIAN-EARLIEST SILURIAN RIFT THOLEIITES IN THE ACATLÁN COMPLEX, SOUTHERN MEXICO: EVIDENCE OF RIFTING ON THE SOUTHERN MARGIN OF THE RHEIC OCEAN	TECTONOPHYSICS	KEPPIE, J. D.; DOSTAL, J.; MILLER, B. V.; RAMOS-ARIAS, M. A.; MORALES-GAMEZ, M.; NANCE, R. D.; MURPHY, J. B.; ORTEGA-RIVERA, A.; LEE, J. W. K.; COOPER, P.		18.25	-98	0.01	251	396.5	542	ICPMS	METAMORPHIC	UNKNOWN	UNKNOWN	GNEISS																			18.7		49.7	6.54	26.9	5.44	1.24	4.35	0.641	3.66	0.729	2.13	0.299
95TB 6A		GEOROC	10.1016/S0016-7037(97)00324-4	LATE ARCHEAN MANTLE COMPOSITION AND CRUSTAL GROWTH IN THE WESTERN SUPERIOR PROVINCE OF CANADA: NEODYMIUM AND LEAD ISOTOPIC EVIDENCE FROM THE WAWA, QUETICO, AND WABIGOON SUBPROVINCES	GEOCHIM. COSMOCHIM. ACTA	HENRY, P.; STEVENSON, R. K.; GARIEPY, C.		48.8	-91.5	0.01	2500	3175	3850	TIMS_ID	METAMORPHIC	UNKNOWN	UNKNOWN	GNEISS																							14.53	3.21
95TB 6A		GEOROC	10.1016/S0016-7037(97)00324-4	LATE ARCHEAN MANTLE COMPOSITION AND CRUSTAL GROWTH IN THE WESTERN SUPERIOR PROVINCE OF CANADA: NEODYMIUM AND LEAD ISOTOPIC EVIDENCE FROM THE WAWA, QUETICO, AND WABIGOON SUBPROVINCES	GEOCHIM. COSMOCHIM. ACTA	HENRY, P.; STEVENSON, R. K.; GARIEPY, C.		48.8	-91.5	0.01	2500	3175	3850	TIMS	METAMORPHIC	UNKNOWN	UNKNOWN	GNEISS
79		GEOROC	10.1016/S0377-0273(03)00412-8	TIME SCALE OF MAGMA MIXING BETWEEN BASALT AND DACITE ESTIMATED FOR THE SAGA-FUTAGOYAMA VOLCANIC ROCKS IN NORTHWEST KYUSHU, SOUTHWEST JAPAN		SCHÜRMANN, H. M. E.		28.68	32.62	0.01				NOT GIVEN	METAMORPHIC	UNKNOWN	UNKNOWN	GNEISS	63.775	0.96	14.885	3.06		2.085		1.26	5.435	4.42	1.265	0.14	0.06		2.085	0.055
OES-99-50		GEOROC	10.1016/S0301-9268(02)00026-8	U-PB GEOCHRONOLOGY AND GEOCHEMISTRY OF EARLY PROTEROZOIC ROCKS OF THE TECTONIC BASEMENT WINDOWS IN CENTRAL NORDLAND, CALEDONIDES OF NORTH-CENTRAL NORWAY	PREC. RESEARCH	SKAR, O.		66.5	12.5	0.01				XRF	METAMORPHIC	UNKNOWN	UNKNOWN	GNEISS	62.81	1.02	15.75		5.56			0.98	2.58	4.46	5.07	0.37	0.14						106		170		70
OES-99-50		GEOROC	10.1016/S0301-9268(02)00026-8	U-PB GEOCHRONOLOGY AND GEOCHEMISTRY OF EARLY PROTEROZOIC ROCKS OF THE TECTONIC BASEMENT WINDOWS IN CENTRAL NORDLAND, CALEDONIDES OF NORTH-CENTRAL NORWAY	PREC. RESEARCH	SKAR, O.		66.5	12.5	0.01				IGN	METAMORPHIC	UNKNOWN	UNKNOWN	GNEISS														0.31
1442		GEOROC	10.1007/BF00306549	GEOLOGY OF CARBONATITE- ALKALIC ROCK COMPLEXES IN ONTARIO	ONTARIO GEOL. SURV. STUDY	SAGE, R. P.		47.92	-83.25	0.01	542	1521	2500	NOT GIVEN	METAMORPHIC	UNKNOWN	UNKNOWN	GNEISS	28.7	0.75	7.1	2.7		8.82		10.4	16.5	1.98	5.38	1.25	0.3		0.72	0.16			0		120		60
3		GEOROC	10.1016/0012-821X(72)90283-X	THE GEOLOGY AND PETROLOGY OF THE ALKALINE CARBONATITE COMPLEX AT CALLANDER BAY, ONTARIO	GEOL. SURV. CAN. BULL.	FERGUSON, J.; CURRIE, K.L.		46.2	-79.4	0.01	542	1521	2500	NOT GIVEN	METAMORPHIC	UNKNOWN	UNKNOWN	GNEISS	68.05	0.65	14.81	1.1		2.4		1.27	2.17	3.22	4.41	0.22	0.07				0.7
MR-3		GEOROC	10.1016/S0301-9268(02)00077-3	ND ISOTOPIC STUDY OF THE NEOPROTEROZOIC MARA ROSA ARC, CENTRAL BRAIL: IMPLICATIONS FOR THE EVOLUTION OF THE BRASILIA BELT	PREC. RESEARCH	JUNGES, S. L.; PIMENTEL, M. M.; DE MORAES, R.		-14	-49.3	0.01				TIMS_ID	METAMORPHIC	UNKNOWN	UNKNOWN	GNEISS																							14.35	3
MR-3		GEOROC	10.1016/S0301-9268(02)00077-3	ND ISOTOPIC STUDY OF THE NEOPROTEROZOIC MARA ROSA ARC, CENTRAL BRAIL: IMPLICATIONS FOR THE EVOLUTION OF THE BRASILIA BELT	PREC. RESEARCH	JUNGES, S. L.; PIMENTEL, M. M.; DE MORAES, R.		-14	-49.3	0.01				TIMS	METAMORPHIC	UNKNOWN	UNKNOWN	GNEISS
289246		GEOROC	10.1007/s00710-014-0352-4	ACCRETION AND EVOLUTION OF AN ARCHEAN HIGH-GRADE GREY GNEISS-AMPHIBOLITE COMPLEX: THE FISKEFJORD AREA, SOUTHERN WEST GREENLAND	BULL. GEOL. GREENLAND SURV.	GARDE, A. A.		64.7245	-51.2894	0.01	2500	3175	3850	XRF	METAMORPHIC	UNKNOWN	UNKNOWN	GNEISS	68.33	0.4	16.31				2.82	1.13	4.31		0.48	0.12	0.05						13		16		6
289246		GEOROC	10.1007/s00710-014-0352-4	ACCRETION AND EVOLUTION OF AN ARCHEAN HIGH-GRADE GREY GNEISS-AMPHIBOLITE COMPLEX: THE FISKEFJORD AREA, SOUTHERN WEST GREENLAND	BULL. GEOL. GREENLAND SURV.	GARDE, A. A.		64.7245	-51.2894	0.01	2500	3175	3850	TIT	METAMORPHIC	UNKNOWN	UNKNOWN	GNEISS				1.03		1.89
289246		GEOROC	10.1007/s00710-014-0352-4	ACCRETION AND EVOLUTION OF AN ARCHEAN HIGH-GRADE GREY GNEISS-AMPHIBOLITE COMPLEX: THE FISKEFJORD AREA, SOUTHERN WEST GREENLAND	BULL. GEOL. GREENLAND SURV.	GARDE, A. A.		64.7245	-51.2894	0.01	2500	3175	3850	INAA	METAMORPHIC	UNKNOWN	UNKNOWN	GNEISS																			12.7		18		7	0.87	0.64		0.1
289246		GEOROC	10.1007/s00710-014-0352-4	ACCRETION AND EVOLUTION OF AN ARCHEAN HIGH-GRADE GREY GNEISS-AMPHIBOLITE COMPLEX: THE FISKEFJORD AREA, SOUTHERN WEST GREENLAND	BULL. GEOL. GREENLAND SURV.	GARDE, A. A.		64.7245	-51.2894	0.01	2500	3175	3850	IGN	METAMORPHIC	UNKNOWN	UNKNOWN	GNEISS														0.21
289246		GEOROC	10.1007/s00710-014-0352-4	ACCRETION AND EVOLUTION OF AN ARCHEAN HIGH-GRADE GREY GNEISS-AMPHIBOLITE COMPLEX: THE FISKEFJORD AREA, SOUTHERN WEST GREENLAND	BULL. GEOL. GREENLAND SURV.	GARDE, A. A.		64.7245	-51.2894	0.01	2500	3175	3850	AAS	METAMORPHIC	UNKNOWN	UNKNOWN	GNEISS										5.17
B-79-15A		GEOROC	10.1007/s004100050210	GEOCHRONOLOGIC AND SR-ISOTOPIC STUDIES OF CERTAIN UNITS IN THE BARBERTON GRANITE-GREENSTONE TERRANE, SOUTH AFRICA	SPEC. PUBL. GEOL. SOC. S. AFR.	BARTON, J. M. JR.; ROBB, L. J.; ANHAEUSSER, C. R.; VAN NIEROP, D. A.		-25.8	31	0.01	2500	3175	3850	NOT GIVEN	METAMORPHIC	UNKNOWN	UNKNOWN	GNEISS
HUD6		GEOROC	10.1139/e87-042	FORMATION OF CANADIAN 1.9 GA OLD CONTINENTAL CRUST. I: ND ISOTOPIC DATA	CAN. J. EARTH SCI.	CHAUVEL, C.; ARNDT, N. T.; KIELINZCUK, S.; THOM, A.		54	-105.3	0.01	1800	1850	1900	TIMS	METAMORPHIC	UNKNOWN	UNKNOWN	GNEISS																							28.03	4.4
Z11HO		GEOROC	10.1007/BF00381291	HIGH D18O AND POSSIBLE PRE-ERUPTIONAL RB-SR ISOCHRONS IN CORDIERITE-BEARING NEOGENE VOLCANICS FROM SE SPAIN	CONTRIB. MINERAL. PETROL.	MUNKSGAARD, N. C.		37	-2.4	0.01	2.6	12.8	23	XRF	METAMORPHIC	UNKNOWN	UNKNOWN	GNEISS	38.9										3.23
Z11HO		GEOROC	10.1007/BF00381291	HIGH D18O AND POSSIBLE PRE-ERUPTIONAL RB-SR ISOCHRONS IN CORDIERITE-BEARING NEOGENE VOLCANICS FROM SE SPAIN	CONTRIB. MINERAL. PETROL.	MUNKSGAARD, N. C.		37	-2.4	0.01	2.6	12.8	23	TIMS	METAMORPHIC	UNKNOWN	UNKNOWN	GNEISS
R101-1		GEOROC	10.1016/j.chemgeo.2007.04.009	PETROCHEMICAL STUDIES OF THE RYOKE GRANITIC ROCKS FROM THE RIVER KOSHIBU DISTRICT, CENTRAL JAPAN	J. FAC. SCI., SHINSHU UNIV.	YAMADA, T.		35.5	138	0.01				NOT GIVEN	METAMORPHIC	UNKNOWN	UNKNOWN	GNEISS	58.72	0.08	19.51	2.03		5.66		2.66	6.06	2.25	1.72	0.04	0.04		0.51	0.22
19		GEOROC	10.2973/dsdp.proc.89.118.1986	THE GEOLOGY AND PETROLOGY OF THE ALKALINE CARBONATITE COMPLEX AT CALLANDER BAY, ONTARIO	GEOL. SURV. CAN. BULL.	FERGUSON, J.; CURRIE, K.L.		46.2	-79.4	0.01	542	1521	2500	NOT GIVEN	METAMORPHIC	UNKNOWN	UNKNOWN	GNEISS	68.36	0.86	12.31	1.21		5.6		0.71	1.88	3.4	4.62	0.18	0.12				0.6
BA48		GEOROC	10.1016/0301-9268(95)00072-0	THE OLDEST PART OF THE BARBERTON GRANITOID-GREENSTONE TERRAIN, SOUTH AFRICA: EVIDENCE FOR CRUST FORMATION BETWEEN 3.5 AND 3.7 GA	PREC. RESEARCH	KRÖNER, A.; HEGNER, E.; WENDT, J. I.; BYERLY, G. R.		-26.13	30.98	0.01	2500	3175	3850	TIMS_ID	METAMORPHIC	UNKNOWN	UNKNOWN	GNEISS																							14.38	2.79
BA48		GEOROC	10.1016/0301-9268(95)00072-0	THE OLDEST PART OF THE BARBERTON GRANITOID-GREENSTONE TERRAIN, SOUTH AFRICA: EVIDENCE FOR CRUST FORMATION BETWEEN 3.5 AND 3.7 GA	PREC. RESEARCH	KRÖNER, A.; HEGNER, E.; WENDT, J. I.; BYERLY, G. R.		-26.13	30.98	0.01	2500	3175	3850	TIMS	METAMORPHIC	UNKNOWN	UNKNOWN	GNEISS
PBA99-1450B		GEOROC	10.1016/j.precamres.2003.12.017	BASEMENT TERRANE CORRELATIONS AND CRUSTAL RECYCLING IN THE WESTERN SUPERIOR PROVINCE: ND ISOTOPIC CHARACTER OF GRANITOID AND FELSIC VOLCANIC ROCKS IN THE WABIGOON SUBPROVINCE, N. ONTARIO, CANADA	PREC. RESEARCH	TOMLINSON, K. Y.; STOTT, G. M.; PERCIVAL, J. A.; STONE, D.		49.9	-89.3	0.01	2500	3175	3850	TIMS_ID	METAMORPHIC	UNKNOWN	UNKNOWN	GNEISS																							29.39	3.32
PBA99-1450B		GEOROC	10.1016/j.precamres.2003.12.017	BASEMENT TERRANE CORRELATIONS AND CRUSTAL RECYCLING IN THE WESTERN SUPERIOR PROVINCE: ND ISOTOPIC CHARACTER OF GRANITOID AND FELSIC VOLCANIC ROCKS IN THE WABIGOON SUBPROVINCE, N. ONTARIO, CANADA	PREC. RESEARCH	TOMLINSON, K. Y.; STOTT, G. M.; PERCIVAL, J. A.; STONE, D.		49.9	-89.3	0.01	2500	3175	3850	TIMS	METAMORPHIC	UNKNOWN	UNKNOWN	GNEISS
B-79-14H		GEOROC	10.1016/j.lithos.2009.04.023	GEOCHRONOLOGIC AND SR-ISOTOPIC STUDIES OF CERTAIN UNITS IN THE BARBERTON GRANITE-GREENSTONE TERRANE, SOUTH AFRICA	SPEC. PUBL. GEOL. SOC. S. AFR.	BARTON, J. M. JR.; ROBB, L. J.; ANHAEUSSER, C. R.; VAN NIEROP, D. A.		-26.1	31	0.01	2500	3175	3850	NOT GIVEN	METAMORPHIC	UNKNOWN	UNKNOWN	GNEISS
RL-94-26		GEOROC	10.1016/S0040-1951(00)00060-3	ND ISOTOPIC EVIDENCE FOR EARLY TO LATE ARCHEAN (3.4-2.7 GA) CRUSTAL GROWTH IN THE WESTERN SUPERIOR PROVINCE (ONTARIO, CANADA)	TECTONOPHYSICS	HENRY, P.; STEVENSON, R. K.; LARBI, Y.; GARIEPY, C.		48.7	-86.4	0.01	3170	3170	3170	TIMS_ID	METAMORPHIC	UNKNOWN	UNKNOWN	GNEISS																							58.52	9.24
RL-94-26		GEOROC	10.1016/S0040-1951(00)00060-3	ND ISOTOPIC EVIDENCE FOR EARLY TO LATE ARCHEAN (3.4-2.7 GA) CRUSTAL GROWTH IN THE WESTERN SUPERIOR PROVINCE (ONTARIO, CANADA)	TECTONOPHYSICS	HENRY, P.; STEVENSON, R. K.; LARBI, Y.; GARIEPY, C.		48.7	-86.4	0.01	3170	3170	3170	TIMS	METAMORPHIC	UNKNOWN	UNKNOWN	GNEISS
B-78-15D		GEOROC	10.1016/j.margeo.2015.09.006	GEOCHRONOLOGIC AND SR-ISOTOPIC STUDIES OF CERTAIN UNITS IN THE BARBERTON GRANITE-GREENSTONE TERRANE, SOUTH AFRICA	SPEC. PUBL. GEOL. SOC. S. AFR.	BARTON, J. M. JR.; ROBB, L. J.; ANHAEUSSER, C. R.; VAN NIEROP, D. A.		-26.15	30.5	0.01	2500	3175	3850	NOT GIVEN	METAMORPHIC	UNKNOWN	UNKNOWN	GNEISS
493121		GEOROC	10.1016/j.precamres.2010.10.003	FIELD AND GEOCHEMICAL CHARACTERISTICS OF MESOARCHEAN TO NEOARCHEAN VOLCANIC ROCKS IN THE STOROE GREENSTONE BELT, SW GREENLAND: EVIDENCE FOR ACCRETION OF INTRA-OCEANIC VOLCANIC ARCS	PREC. RESEARCH	ORDONEZ-CALDERON, J. C.; POLAT, A.; FRYER, B. J.; GAGNON, J. E.		64.4254	-51.0172	0.01	2800	2930	3060	IGN	METAMORPHIC	UNKNOWN	UNKNOWN	GNEISS														0
493121		GEOROC	10.1016/j.precamres.2010.10.003	FIELD AND GEOCHEMICAL CHARACTERISTICS OF MESOARCHEAN TO NEOARCHEAN VOLCANIC ROCKS IN THE STOROE GREENSTONE BELT, SW GREENLAND: EVIDENCE FOR ACCRETION OF INTRA-OCEANIC VOLCANIC ARCS	PREC. RESEARCH	ORDONEZ-CALDERON, J. C.; POLAT, A.; FRYER, B. J.; GAGNON, J. E.		64.4254	-51.0172	0.01	2800	2930	3060	ICPOES	METAMORPHIC	UNKNOWN	UNKNOWN	GNEISS	55.31	0.99	18.52		15.5			2.7	2.33	3.48	0.94	0.06	0.16
493121		GEOROC	10.1016/j.precamres.2010.10.003	FIELD AND GEOCHEMICAL CHARACTERISTICS OF MESOARCHEAN TO NEOARCHEAN VOLCANIC ROCKS IN THE STOROE GREENSTONE BELT, SW GREENLAND: EVIDENCE FOR ACCRETION OF INTRA-OCEANIC VOLCANIC ARCS	PREC. RESEARCH	ORDONEZ-CALDERON, J. C.; POLAT, A.; FRYER, B. J.; GAGNON, J. E.		64.4254	-51.0172	0.01	2800	2930	3060	ICPMS	METAMORPHIC	UNKNOWN	UNKNOWN	GNEISS																			22.76		49.66	5.97	23.48	4.7	1.98	5.27	0.98	6.04	1.23	3.38	0.48
5329		GEOROC	10.1016/0301-9268(94)90099-X	GEOCHEMISTRY OF THE NEOPROTEROZOIC TILEMSI BELT OF IFORAS (MALI, SAHARA): A CRUSTAL SECTION OF AN OCEANIC ISLAND ARC	PREC. RESEARCH	DOSTAL, J.; DUPUY, C.; CABY, R.		20	1	0.01				XRF	METAMORPHIC	UNKNOWN	UNKNOWN	GNEISS
5329		GEOROC	10.1016/0301-9268(94)90099-X	GEOCHEMISTRY OF THE NEOPROTEROZOIC TILEMSI BELT OF IFORAS (MALI, SAHARA): A CRUSTAL SECTION OF AN OCEANIC ISLAND ARC	PREC. RESEARCH	DOSTAL, J.; DUPUY, C.; CABY, R.		20	1	0.01				NOT GIVEN	METAMORPHIC	UNKNOWN	UNKNOWN	GNEISS															0.71	0.14
5329		GEOROC	10.1016/0301-9268(94)90099-X	GEOCHEMISTRY OF THE NEOPROTEROZOIC TILEMSI BELT OF IFORAS (MALI, SAHARA): A CRUSTAL SECTION OF AN OCEANIC ISLAND ARC	PREC. RESEARCH	DOSTAL, J.; DUPUY, C.; CABY, R.		20	1	0.01				ICPMS	METAMORPHIC	UNKNOWN	UNKNOWN	GNEISS																			14.06		34.22	4.39	18.18	3.86	1.08	3.63	0.48	2.9	0.57	1.56	0.22
5329		GEOROC	10.1016/0301-9268(94)90099-X	GEOCHEMISTRY OF THE NEOPROTEROZOIC TILEMSI BELT OF IFORAS (MALI, SAHARA): A CRUSTAL SECTION OF AN OCEANIC ISLAND ARC	PREC. RESEARCH	DOSTAL, J.; DUPUY, C.; CABY, R.		20	1	0.01				AAS	METAMORPHIC	UNKNOWN	UNKNOWN	GNEISS	57.79	0.97	15.91		7.21			4.95	6.5	3.69	1.28	0.23	0.11
R623B		GEOROC	10.1130/G31123.1	EVIDENCE FROM ZIRCON U-PB AGE SPECTRA FOR CRUSTAL STRUCTURE AND FELSIC MAGMA GENESIS AT TAUPO VOLCANO, NEW ZEALAND	GEOLOGY	CHARLIER, BRUCE L. A.; WILSON, C. J. N.; MORTIMER, N.		-38.7	176.1	0.01				XRF	METAMORPHIC	UNKNOWN	UNKNOWN	GNEISS	65.62	0.77	16.46		5.22			1.75	2.69	4.02	3.22	0.18	0.08	0.69
CL87-42F		GEOROC	10.1007/BF00310736	SELECTIVELY CONTAMINATED MAGMAS OF THE TERTIARY EAST GREENLAND MACRODIKE COMPLEX	CONTRIB. MINERAL. PETROL.	BLICHERT-TOFT, J.; LESHER, C. E.; ROSING, M. T.		68.25	-29.67	0.01	0	32.75	65.5	TIMS_ID	METAMORPHIC	UNKNOWN	UNKNOWN	GNEISS																							8.66	2.581
CL87-42F		GEOROC	10.1007/BF00310736	SELECTIVELY CONTAMINATED MAGMAS OF THE TERTIARY EAST GREENLAND MACRODIKE COMPLEX	CONTRIB. MINERAL. PETROL.	BLICHERT-TOFT, J.; LESHER, C. E.; ROSING, M. T.		68.25	-29.67	0.01	0	32.75	65.5	TIMS	METAMORPHIC	UNKNOWN	UNKNOWN	GNEISS
CL87-42F		GEOROC	10.1007/BF00310736	SELECTIVELY CONTAMINATED MAGMAS OF THE TERTIARY EAST GREENLAND MACRODIKE COMPLEX	CONTRIB. MINERAL. PETROL.	BLICHERT-TOFT, J.; LESHER, C. E.; ROSING, M. T.		68.25	-29.67	0.01	0	32.75	65.5	DCPAES	METAMORPHIC	UNKNOWN	UNKNOWN	GNEISS	51.5	0.84	13.9		11.98			7.2	11.25	2.82	0.63	0.08	0.19
O-309		GEOROC	10.2973/odp.proc.sr.135.136.1994	THE METAGABBROS AND RELATED ROCKS OF THE ^YAKUNO COMPLEX^ IN THE INNER ZONE OF SOUTHWEST JAPAN	REPT. GEOL. SURV. JAPAN	IGI, S.		34.3	132.5	0.01				NOT GIVEN	METAMORPHIC	UNKNOWN	UNKNOWN	GNEISS	64.67	0.37	16.58	0.84		5.64		2.38	2.6	2.64	1	0.04	0.1		2.07	0.56
NBR2-3		GEOROC	10.1016/S0012-821X(98)00105-8	SETOUCHI HIGH-MG ANDESITES REVISITED: GEOCHEMICAL EVIDENCE FOR MELTING OF SUBDUCTING SEDIMENTS	EARTH PLANET. SCI. LETT.	SHIMODA, G.; TATSUMI, Y.; NOHDA, S.; ISHIZAKA, K.; JAHN, B.-M.		34	136.5	0.01				XRF	METAMORPHIC	UNKNOWN	UNKNOWN	GNEISS	76.89	0.12	13.59		1.3			0.3	1.86	3.36	3.18	0.05	0.03
NBR2-3		GEOROC	10.1016/S0012-821X(98)00105-8	SETOUCHI HIGH-MG ANDESITES REVISITED: GEOCHEMICAL EVIDENCE FOR MELTING OF SUBDUCTING SEDIMENTS	EARTH PLANET. SCI. LETT.	SHIMODA, G.; TATSUMI, Y.; NOHDA, S.; ISHIZAKA, K.; JAHN, B.-M.		34	136.5	0.01				TIMS	METAMORPHIC	UNKNOWN	UNKNOWN	GNEISS
B-78-12D		GEOROC	10.1130/0091-7613(1988)016<0692:AASISO>2.3.CO;2	GEOCHRONOLOGIC AND SR-ISOTOPIC STUDIES OF CERTAIN UNITS IN THE BARBERTON GRANITE-GREENSTONE TERRANE, SOUTH AFRICA	SPEC. PUBL. GEOL. SOC. S. AFR.	BARTON, J. M. JR.; ROBB, L. J.; ANHAEUSSER, C. R.; VAN NIEROP, D. A.		-26.1	31	0.01	2500	3175	3850	NOT GIVEN	METAMORPHIC	UNKNOWN	UNKNOWN	GNEISS
278702		GEOROC	10.1016/S0377-0273(00)00259-6	ACCRETION AND EVOLUTION OF AN ARCHEAN HIGH-GRADE GREY GNEISS-AMPHIBOLITE COMPLEX: THE FISKEFJORD AREA, SOUTHERN WEST GREENLAND	BULL. GEOL. GREENLAND SURV.	GARDE, A. A.		64.98	-51.3	0.01	2500	3175	3850	XRF	METAMORPHIC	UNKNOWN	UNKNOWN	GNEISS
278702		GEOROC	10.1016/S0377-0273(00)00259-6	ACCRETION AND EVOLUTION OF AN ARCHEAN HIGH-GRADE GREY GNEISS-AMPHIBOLITE COMPLEX: THE FISKEFJORD AREA, SOUTHERN WEST GREENLAND	BULL. GEOL. GREENLAND SURV.	GARDE, A. A.		64.98	-51.3	0.01	2500	3175	3850	TIMS	METAMORPHIC	UNKNOWN	UNKNOWN	GNEISS
B-79-14A		GEOROC	10.1016/j.chemgeo.2008.09.011	GEOCHRONOLOGIC AND SR-ISOTOPIC STUDIES OF CERTAIN UNITS IN THE BARBERTON GRANITE-GREENSTONE TERRANE, SOUTH AFRICA	SPEC. PUBL. GEOL. SOC. S. AFR.	BARTON, J. M. JR.; ROBB, L. J.; ANHAEUSSER, C. R.; VAN NIEROP, D. A.		-26.1	31	0.01	2500	3175	3850	NOT GIVEN	METAMORPHIC	UNKNOWN	UNKNOWN	GNEISS
B-77-37B		GEOROC	10.1016/j.gca.2012.05.043	GEOCHRONOLOGIC AND SR-ISOTOPIC STUDIES OF CERTAIN UNITS IN THE BARBERTON GRANITE-GREENSTONE TERRANE, SOUTH AFRICA	SPEC. PUBL. GEOL. SOC. S. AFR.	BARTON, J. M. JR.; ROBB, L. J.; ANHAEUSSER, C. R.; VAN NIEROP, D. A.		-25.78	31.05	0.01	2500	3175	3850	NOT GIVEN	METAMORPHIC	UNKNOWN	UNKNOWN	GNEISS
PC-440		GEOROC	10.1093/petrology/egr014	IMPLICATIONS OF THE NUVVUAGITTUQ GREENSTONE BELT FOR THE FORMATION OF EARTHS EARLY CRUST	J. PETROL.	O^NEIL, J.; FRANCIS, D. M.; CARLSON, R. W.		58	-77	0.01				XRF	METAMORPHIC	UNKNOWN	UNKNOWN	GNEISS	53.03	0.543	15.37				9.85292	11	1.33	0.3	2.71	0.056	0.199
PC-440		GEOROC	10.1093/petrology/egr014	IMPLICATIONS OF THE NUVVUAGITTUQ GREENSTONE BELT FOR THE FORMATION OF EARTHS EARLY CRUST	J. PETROL.	O^NEIL, J.; FRANCIS, D. M.; CARLSON, R. W.		58	-77	0.01				IGN	METAMORPHIC	UNKNOWN	UNKNOWN	GNEISS														4.76
289104		GEOROC	10.1130/0-8137-2322-1.67	ACCRETION AND EVOLUTION OF AN ARCHEAN HIGH-GRADE GREY GNEISS-AMPHIBOLITE COMPLEX: THE FISKEFJORD AREA, SOUTHERN WEST GREENLAND	BULL. GEOL. GREENLAND SURV.	GARDE, A. A.		64.8723	-51.3168	0.01	2500	3175	3850	XRF	METAMORPHIC	UNKNOWN	UNKNOWN	GNEISS
289104		GEOROC	10.1130/0-8137-2322-1.67	ACCRETION AND EVOLUTION OF AN ARCHEAN HIGH-GRADE GREY GNEISS-AMPHIBOLITE COMPLEX: THE FISKEFJORD AREA, SOUTHERN WEST GREENLAND	BULL. GEOL. GREENLAND SURV.	GARDE, A. A.		64.8723	-51.3168	0.01	2500	3175	3850	TIMS	METAMORPHIC	UNKNOWN	UNKNOWN	GNEISS
80		GEOROC	10.1093/petrology/egp048	PETROLOGY OF THE PALEOCENE PICRITES AND FLOOD BASALTS ON DISKO AND NUUSSUAQ, WEST GREENLAND		SCHÜRMANN, H. M. E.		25	34	0.01				NOT GIVEN	METAMORPHIC	UNKNOWN	UNKNOWN	GNEISS	54.29	0.78	19.085	4.955		1.4		2.7	4.605	6.26	1.015	0.17	0.05		1.86	0.385
N2		GEOROC	10.2465/ganko.84.221	ARCHAEAN CRUSTAL EVOLUTION OF THE CENTRAL KAAPVAAL CRATON, SOUTH AFRICA; EVIDENCE FROM THE JOHANNESBURG DOME	UNIV. WITWATERSRAND ECON. GEOL. RES. INF. CIRC.	ANHAEUSSER, C. R.		-26.13	25.63	0.01	2500	3175	3850	XRF	METAMORPHIC	UNKNOWN	UNKNOWN	GNEISS	69.38	0.38	15.58	0.46		2.31		0.89	3.11	6.2	0.94	0.1	0.06
N2		GEOROC	10.2465/ganko.84.221	ARCHAEAN CRUSTAL EVOLUTION OF THE CENTRAL KAAPVAAL CRATON, SOUTH AFRICA; EVIDENCE FROM THE JOHANNESBURG DOME	UNIV. WITWATERSRAND ECON. GEOL. RES. INF. CIRC.	ANHAEUSSER, C. R.		-26.13	25.63	0.01	2500	3175	3850	IGN	METAMORPHIC	UNKNOWN	UNKNOWN	GNEISS														0.77
N2		GEOROC	10.2465/ganko.84.221	ARCHEAN CRUSTAL EVOLUTION OF THE CENTRAL KAAPVAAL CRATON, SOUTH AFRICA: EVIDENCE FROM THE JOHANNESBURG DOME	S. AFR. J. GEOL.	ANHAEUSSER, C. R.		-26.13	25.63	0.01	2500	3175	3850	XRF	METAMORPHIC	UNKNOWN	UNKNOWN	GNEISS	69.38	0.38	15.58	0.46		2.31		0.89	3.11	6.2	0.94	0.1	0.06
N2		GEOROC	10.2465/ganko.84.221	ARCHEAN CRUSTAL EVOLUTION OF THE CENTRAL KAAPVAAL CRATON, SOUTH AFRICA: EVIDENCE FROM THE JOHANNESBURG DOME	S. AFR. J. GEOL.	ANHAEUSSER, C. R.		-26.13	25.63	0.01	2500	3175	3850	IGN	METAMORPHIC	UNKNOWN	UNKNOWN	GNEISS														0.77
B-77-41B		GEOROC	10.1016/j.epsl.2005.04.012	GEOCHRONOLOGIC AND SR-ISOTOPIC STUDIES OF CERTAIN UNITS IN THE BARBERTON GRANITE-GREENSTONE TERRANE, SOUTH AFRICA	SPEC. PUBL. GEOL. SOC. S. AFR.	BARTON, J. M. JR.; ROBB, L. J.; ANHAEUSSER, C. R.; VAN NIEROP, D. A.		-26.1	31	0.01	2500	3175	3850	NOT GIVEN	METAMORPHIC	UNKNOWN	UNKNOWN	GNEISS
6		GEOROC	10.1007/BF00387198	THE EVOLUTION OF A SILICIC MAGMA SYSTEM: ISOTOPIC AND CHEMICAL EVIDENCE FROM THE WOODS MOUNTAINS VOLCANIC CENTER, EASTERN CALIFORNIA	CONTRIB. MINERAL. PETROL.	MUSSELWHITE, D. S.; DEPAOLO, D. J.; MCCURRY, M.		35	-115.25	0.01	15.8	15.8	15.8	XRF	METAMORPHIC	UNKNOWN	UNKNOWN	GNEISS	64.5	0.83	13.9	8.14				2.78	1.22	3.85	3.42	0.02	0.12
6		GEOROC	10.1007/BF00387198	THE EVOLUTION OF A SILICIC MAGMA SYSTEM: ISOTOPIC AND CHEMICAL EVIDENCE FROM THE WOODS MOUNTAINS VOLCANIC CENTER, EASTERN CALIFORNIA	CONTRIB. MINERAL. PETROL.	MUSSELWHITE, D. S.; DEPAOLO, D. J.; MCCURRY, M.		35	-115.25	0.01	15.8	15.8	15.8	TIMS_ID	METAMORPHIC	UNKNOWN	UNKNOWN	GNEISS																							9.74
6		GEOROC	10.1007/BF00387198	THE EVOLUTION OF A SILICIC MAGMA SYSTEM: ISOTOPIC AND CHEMICAL EVIDENCE FROM THE WOODS MOUNTAINS VOLCANIC CENTER, EASTERN CALIFORNIA	CONTRIB. MINERAL. PETROL.	MUSSELWHITE, D. S.; DEPAOLO, D. J.; MCCURRY, M.		35	-115.25	0.01	15.8	15.8	15.8	TIMS	METAMORPHIC	UNKNOWN	UNKNOWN	GNEISS
6		GEOROC	10.1007/BF00387198	THE EVOLUTION OF A SILICIC MAGMA SYSTEM: ISOTOPIC AND CHEMICAL EVIDENCE FROM THE WOODS MOUNTAINS VOLCANIC CENTER, EASTERN CALIFORNIA	CONTRIB. MINERAL. PETROL.	MUSSELWHITE, D. S.; DEPAOLO, D. J.; MCCURRY, M.		35	-115.25	0.01	15.8	15.8	15.8	INAA	METAMORPHIC	UNKNOWN	UNKNOWN	GNEISS																			23.8		33.6		14.3	2.66	2.16		1.3	13			4.6
6		GEOROC	10.1007/BF00387198	THE EVOLUTION OF A SILICIC MAGMA SYSTEM: ISOTOPIC AND CHEMICAL EVIDENCE FROM THE WOODS MOUNTAINS VOLCANIC CENTER, EASTERN CALIFORNIA	CONTRIB. MINERAL. PETROL.	MUSSELWHITE, D. S.; DEPAOLO, D. J.; MCCURRY, M.		35	-115.25	0.01	15.8	15.8	15.8	IGN	METAMORPHIC	UNKNOWN	UNKNOWN	GNEISS														0.84
BAR44		GEOROC	10.1126/science.210.4475.1245	ORIGIN OF LEAD IN ANDEAN CALC-ALKALINE LAVAS, SOUTHERN PERU	SCIENCE	TILTON, G. R.; BAREIRO, B.		-17.15	-69.85	0.01				TIMS_ID	METAMORPHIC	UNKNOWN	UNKNOWN	GNEISS
BAR44		GEOROC	10.1126/science.210.4475.1245	ORIGIN OF LEAD IN ANDEAN CALC-ALKALINE LAVAS, SOUTHERN PERU	SCIENCE	TILTON, G. R.; BAREIRO, B.		-17.15	-69.85	0.01				TIMS	METAMORPHIC	UNKNOWN	UNKNOWN	GNEISS
B20		GEOROC	10.1016/j.chemgeo.2004.12.009	GNEISSOSE CARBONATITE IN THE BULL^S RUN COMPLEX, NATAL	S. AFR. J. GEOL.	SCOGINGS, A. J.; FORSTER, I. F.		-27	30	0.01	542	1521	2500	NOT GIVEN	METAMORPHIC	UNKNOWN	UNKNOWN	GNEISS	59.26	0.16	22	0.49		2.43		0.09	0.49	8.94	4.98	0	0.04
B20		GEOROC	10.1016/j.chemgeo.2004.12.009	GNEISSOSE CARBONATITE IN THE BULL^S RUN COMPLEX, NATAL	S. AFR. J. GEOL.	SCOGINGS, A. J.; FORSTER, I. F.		-27	30	0.01	542	1521	2500	IGN	METAMORPHIC	UNKNOWN	UNKNOWN	GNEISS														1.43
75031611		GEOROC	10.1093/petrology/egi016	CHEMICAL CHARACTERISTICS AND GENESIS OF MINERALIZED, INTERMEDIATE-SERIES GRANITIC PLUTON IN THE HOBENZAN AREA, WESTERN JAPAN	MINING GEOL.	ISHIHARA, S.; SATO, KOHEI; TERASHIMA, S.		33.5	130.5	0.01	65.5	105.5	145.5	IRAS	METAMORPHIC	UNKNOWN	UNKNOWN	GNEISS
75031611		GEOROC	10.1093/petrology/egi016	CHEMICAL CHARACTERISTICS AND GENESIS OF MINERALIZED, INTERMEDIATE-SERIES GRANITIC PLUTON IN THE HOBENZAN AREA, WESTERN JAPAN	MINING GEOL.	ISHIHARA, S.; SATO, KOHEI; TERASHIMA, S.		33.5	130.5	0.01	65.5	105.5	145.5	AAS	METAMORPHIC	UNKNOWN	UNKNOWN	GNEISS
GR04082		GEOROC	10.1016/j.gca.2006.05.014	CHEMICAL AND ISOTOPIC EVIDENCE FOR WIDESPREAD EOARCHEAN METASEDIMENTARY ENCLAVES IN SOUTHERN WEST GREENLAND	GEOCHIM. COSMOCHIM. ACTA	CATES, N. L.; MOJZSIS, S. J.		64	-52	0.01				NOT GIVEN	METAMORPHIC	UNKNOWN	UNKNOWN	GNEISS	76.21	0.07	13.37		1.81			0.4	2.32	5.06	0.66	0.05	0.03	< 0.1					9.4		18	2	8	1.6	0.57	1.4	0.2	1.1	0.22	0.55	0.2
RT-95B		GEOROC	10.1086/314337	U-PB GEOCHRONOLOGY AND ISOTOPE GEOCHEMISTRY OF THE ARCHEAN AND PROTEROZOIC ROCKS OF NORTH-CENTRAL MADAGASCAR	J. GEOL.	TUCKER, R. D.; ASHWAL, L. D.; HANDKE, M. J.; LE GRANGE, M.; HAMILTON, M. A.; RAMBELOSON, R. A.		-19	49	0.01	542	1521	2500	TIMS_ID	METAMORPHIC	UNKNOWN	UNKNOWN	GNEISS																							20.42	3.608
RT-95B		GEOROC	10.1086/314337	U-PB GEOCHRONOLOGY AND ISOTOPE GEOCHEMISTRY OF THE ARCHEAN AND PROTEROZOIC ROCKS OF NORTH-CENTRAL MADAGASCAR	J. GEOL.	TUCKER, R. D.; ASHWAL, L. D.; HANDKE, M. J.; LE GRANGE, M.; HAMILTON, M. A.; RAMBELOSON, R. A.		-19	49	0.01	542	1521	2500	TIMS	METAMORPHIC	UNKNOWN	UNKNOWN	GNEISS
505729		GEOROC	10.1016/j.precamres.2005.08.004	PROVENANCE AND TECTONIC DEVELOPMENT OF THE LATE ARCHAEAN GAWLER CRATON, AUSTRALIA; U-PB ZIRCON, GEOCHEMICAL AND SM-ND ISOTOPIC IMPLICATIONS	PREC. RESEARCH	SWAIN, G.; WOODHOUSE, A.; HAND, M.; BAROVICH, K. M.; SCHWARZ, M.; FANNING, C. M.		-30.3	133.517	0.01				IGN	METAMORPHIC	UNKNOWN	UNKNOWN	GNEISS														0.53
505729		GEOROC	10.1016/j.precamres.2005.08.004	PROVENANCE AND TECTONIC DEVELOPMENT OF THE LATE ARCHAEAN GAWLER CRATON, AUSTRALIA; U-PB ZIRCON, GEOCHEMICAL AND SM-ND ISOTOPIC IMPLICATIONS	PREC. RESEARCH	SWAIN, G.; WOODHOUSE, A.; HAND, M.; BAROVICH, K. M.; SCHWARZ, M.; FANNING, C. M.		-30.3	133.517	0.01				ICPOES	METAMORPHIC	UNKNOWN	UNKNOWN	GNEISS	68.4	0.68	15.3	5.11				2.36	2.21	2.98	2.76	0.05	0.07
505729		GEOROC	10.1016/j.precamres.2005.08.004	PROVENANCE AND TECTONIC DEVELOPMENT OF THE LATE ARCHAEAN GAWLER CRATON, AUSTRALIA; U-PB ZIRCON, GEOCHEMICAL AND SM-ND ISOTOPIC IMPLICATIONS	PREC. RESEARCH	SWAIN, G.; WOODHOUSE, A.; HAND, M.; BAROVICH, K. M.; SCHWARZ, M.; FANNING, C. M.		-30.3	133.517	0.01				ICPMS	METAMORPHIC	UNKNOWN	UNKNOWN	GNEISS																			50		83	10	35.5	5.5	1.6	4.1	0.6	3.1	0.6	1.5	0.2
RG-6		GEOROC	10.1016/S0012-821X(97)00091-5	GEOCHRONOLOGY AND ND ISOTOPIC DATA OF GRENVILLE-AGE ROCKS IN THE COLOMBIAN ANDES: NEW CONSTRAINTS FOR LATE PROTEROZOIC-EARLY PALEOZOIC PALEOCONTINENTAL RECONSTRUCTIONS OF THE AMERICAS	EARTH PLANET. SCI. LETT.	RESTREPO-PACE, P. A.; RUIZ, J.; GEHRELS, G. E.; COSCA, M. A.		5	-73.5	0.01				NOT GIVEN	METAMORPHIC	UNKNOWN	UNKNOWN	GNEISS																							9.68	1.13
14SMS 70-8/147.20		GEOROC	10.1016/j.margeo.2015.09.006	ARCHEAN EVOLUTION OF THE TIPASJÄRVI-KUHMO-SUOMUSSALMI GREENSTONE COMPLEX, FINLAND	BULL. GEOL. SURV. FINLAND	PAPUNEN, H.; HALKOAHO, T.; LUUKKONEN, E:		65.1657	29.0866	0.01	2500	3175	3850	XRF	METAMORPHIC	UNKNOWN	UNKNOWN	GNEISS	59.3	0.632	18				8.37	2.83	0.66	7.09	1.74	0.098	0.107
14SMS 70-8/147.20		GEOROC	10.1016/j.margeo.2015.09.006	ARCHEAN EVOLUTION OF THE TIPASJÄRVI-KUHMO-SUOMUSSALMI GREENSTONE COMPLEX, FINLAND	BULL. GEOL. SURV. FINLAND	PAPUNEN, H.; HALKOAHO, T.; LUUKKONEN, E:		65.1657	29.0866	0.01	2500	3175	3850	NOT GIVEN	METAMORPHIC	UNKNOWN	UNKNOWN	GNEISS																			20		10
TOH6		GEOROC	10.1016/j.precamres.2004.12.002	THE EGLAB MASSIF IN THE WEST AFRICAN CRATON (ALGERIA), AN ORIGINAL SEGMENT OF THE EBURNEAN OROGENIC BELT: PETROLOGY, GEOCHEMISTRY AND GEOCHRONOLOGY	PREC. RESEARCH	PEUCAT, J. J.; CAPDEVILA, R.; DRARENI, A.; MAHDJOUB, Y.; KAHOUI, M.		26	-3	0.01				TIMS_ID	METAMORPHIC	UNKNOWN	UNKNOWN	GNEISS																							44.44	7.31
TOH6		GEOROC	10.1016/j.precamres.2004.12.002	THE EGLAB MASSIF IN THE WEST AFRICAN CRATON (ALGERIA), AN ORIGINAL SEGMENT OF THE EBURNEAN OROGENIC BELT: PETROLOGY, GEOCHEMISTRY AND GEOCHRONOLOGY	PREC. RESEARCH	PEUCAT, J. J.; CAPDEVILA, R.; DRARENI, A.; MAHDJOUB, Y.; KAHOUI, M.		26	-3	0.01				TIMS	METAMORPHIC	UNKNOWN	UNKNOWN	GNEISS
TOH6		GEOROC	10.1016/j.precamres.2004.12.002	THE EGLAB MASSIF IN THE WEST AFRICAN CRATON (ALGERIA), AN ORIGINAL SEGMENT OF THE EBURNEAN OROGENIC BELT: PETROLOGY, GEOCHEMISTRY AND GEOCHRONOLOGY	PREC. RESEARCH	PEUCAT, J. J.; CAPDEVILA, R.; DRARENI, A.; MAHDJOUB, Y.; KAHOUI, M.		26	-3	0.01				IGN	METAMORPHIC	UNKNOWN	UNKNOWN	GNEISS														1.17
TOH6		GEOROC	10.1016/j.precamres.2004.12.002	THE EGLAB MASSIF IN THE WEST AFRICAN CRATON (ALGERIA), AN ORIGINAL SEGMENT OF THE EBURNEAN OROGENIC BELT: PETROLOGY, GEOCHEMISTRY AND GEOCHRONOLOGY	PREC. RESEARCH	PEUCAT, J. J.; CAPDEVILA, R.; DRARENI, A.; MAHDJOUB, Y.; KAHOUI, M.		26	-3	0.01				ICPMS	METAMORPHIC	UNKNOWN	UNKNOWN	GNEISS																			51.33		107.1	11.97	46.14	7.51	1.71	5.65	0.76	4.2	0.83	2.24	0.37
TOH6		GEOROC	10.1016/j.precamres.2004.12.002	THE EGLAB MASSIF IN THE WEST AFRICAN CRATON (ALGERIA), AN ORIGINAL SEGMENT OF THE EBURNEAN OROGENIC BELT: PETROLOGY, GEOCHEMISTRY AND GEOCHRONOLOGY	PREC. RESEARCH	PEUCAT, J. J.; CAPDEVILA, R.; DRARENI, A.; MAHDJOUB, Y.; KAHOUI, M.		26	-3	0.01				ICPAES	METAMORPHIC	UNKNOWN	UNKNOWN	GNEISS	68.61	0.44	14.63		3.7			0.99	2.57	4.72	2.63	0.14	0.06
ET15		GEOROC	10.1016/S0899-5362(98)00006-2	GEOCHEMISTRY, PB-PB SINGLE ZIRCON AGES AND ND-SR ISOTOPE COMPOSITION OF PRECAMBRIAN ROCKS FROM SOUTHERN AND EASTERN ETHIOPIA: IMPLICATIONS FOR CRUSTAL EVOLUTION IN EAST AFRICA	J. AFR. EARTH SCI.	TEKLAY, M.; KRÖNER, A.; MEZGER, J. E.; OBERHÄNSLI, R. E.		4	39	0.01				XRF	METAMORPHIC	UNKNOWN	UNKNOWN	GNEISS	73.72	0.3	12.99	1.45				0.14	0.77	5.42	4.14	0.01	0.07
ET15		GEOROC	10.1016/S0899-5362(98)00006-2	GEOCHEMISTRY, PB-PB SINGLE ZIRCON AGES AND ND-SR ISOTOPE COMPOSITION OF PRECAMBRIAN ROCKS FROM SOUTHERN AND EASTERN ETHIOPIA: IMPLICATIONS FOR CRUSTAL EVOLUTION IN EAST AFRICA	J. AFR. EARTH SCI.	TEKLAY, M.; KRÖNER, A.; MEZGER, J. E.; OBERHÄNSLI, R. E.		4	39	0.01				TIT	METAMORPHIC	UNKNOWN	UNKNOWN	GNEISS						1.05
ET15		GEOROC	10.1016/S0899-5362(98)00006-2	GEOCHEMISTRY, PB-PB SINGLE ZIRCON AGES AND ND-SR ISOTOPE COMPOSITION OF PRECAMBRIAN ROCKS FROM SOUTHERN AND EASTERN ETHIOPIA: IMPLICATIONS FOR CRUSTAL EVOLUTION IN EAST AFRICA	J. AFR. EARTH SCI.	TEKLAY, M.; KRÖNER, A.; MEZGER, J. E.; OBERHÄNSLI, R. E.		4	39	0.01				IGN	METAMORPHIC	UNKNOWN	UNKNOWN	GNEISS														0.11
295JTL 96-1		GEOROC	10.3989/egeol.01575-6134	ARCHEAN EVOLUTION OF THE TIPASJÄRVI-KUHMO-SUOMUSSALMI GREENSTONE COMPLEX, FINLAND	BULL. GEOL. SURV. FINLAND	PAPUNEN, H.; HALKOAHO, T.; LUUKKONEN, E:		63.8279	28.8616	0.01	2500	3175	3850	XRF	METAMORPHIC	UNKNOWN	UNKNOWN	GNEISS	66.9	0.616	15.4				5.73	2	2.63	3.91	1.69	0.165	0.145
295JTL 96-1		GEOROC	10.3989/egeol.01575-6134	ARCHEAN EVOLUTION OF THE TIPASJÄRVI-KUHMO-SUOMUSSALMI GREENSTONE COMPLEX, FINLAND	BULL. GEOL. SURV. FINLAND	PAPUNEN, H.; HALKOAHO, T.; LUUKKONEN, E:		63.8279	28.8616	0.01	2500	3175	3850	NOT GIVEN	METAMORPHIC	UNKNOWN	UNKNOWN	GNEISS																			0		50
295JTL 96-1		GEOROC	10.3989/egeol.01575-6134	ARCHEAN EVOLUTION OF THE TIPASJÄRVI-KUHMO-SUOMUSSALMI GREENSTONE COMPLEX, FINLAND	BULL. GEOL. SURV. FINLAND	PAPUNEN, H.; HALKOAHO, T.; LUUKKONEN, E:		63.8279	28.8616	0.01	2500	3175	3850	IGN	METAMORPHIC	UNKNOWN	UNKNOWN	GNEISS														0
K-94-1B		GEOROC	10.1016/S0040-1951(00)00060-3	ND ISOTOPIC EVIDENCE FOR EARLY TO LATE ARCHEAN (3.4-2.7 GA) CRUSTAL GROWTH IN THE WESTERN SUPERIOR PROVINCE (ONTARIO, CANADA)	TECTONOPHYSICS	HENRY, P.; STEVENSON, R. K.; LARBI, Y.; GARIEPY, C.		51	-90	0.01	3051	3051	3051	TIMS_ID	METAMORPHIC	UNKNOWN	UNKNOWN	GNEISS																							29.5	4.01
K-94-1B		GEOROC	10.1016/S0040-1951(00)00060-3	ND ISOTOPIC EVIDENCE FOR EARLY TO LATE ARCHEAN (3.4-2.7 GA) CRUSTAL GROWTH IN THE WESTERN SUPERIOR PROVINCE (ONTARIO, CANADA)	TECTONOPHYSICS	HENRY, P.; STEVENSON, R. K.; LARBI, Y.; GARIEPY, C.		51	-90	0.01	3051	3051	3051	TIMS	METAMORPHIC	UNKNOWN	UNKNOWN	GNEISS
197C		GEOROC	10.1029/91JB01640	CRUSTAL GROWTH IN WEST AFRICA AT 2.1 GA	J. GEOPHYS. RES.	BOHER, M.; ABOUCHAMI, W.; MICHARD, A.; ALBAREDE, F.; ARNDT, N. T.		13.88	-0.08	0.01	542	1521	2500	TIMS_ID	METAMORPHIC	UNKNOWN	UNKNOWN	GNEISS																							68.64	11.16
197C		GEOROC	10.1029/91JB01640	CRUSTAL GROWTH IN WEST AFRICA AT 2.1 GA	J. GEOPHYS. RES.	BOHER, M.; ABOUCHAMI, W.; MICHARD, A.; ALBAREDE, F.; ARNDT, N. T.		13.88	-0.08	0.01	542	1521	2500	TIMS	METAMORPHIC	UNKNOWN	UNKNOWN	GNEISS
PO-85		GEOROC	10.1016/j.lithos.2012.05.025	U-PB AGES AND GEOCHEMISTRY OF MAFIC DYKE SWARMS FROM THE UAUA BLOCK, SAO FRANCISCO CRATON, BRAZIL: LIPS REMNANTS RELEVANT FOR LATE ARCHAEAN	LITHOS	OLIVEIRA, E. P.; SILVEIRA, E. M.; SÖDERLUND, U.; ERNST, R. E.		-9.516	-39.284	0.01				XRF	METAMORPHIC	UNKNOWN	UNKNOWN	GNEISS	64.018	0.3279	18.591		1.714			0.299	1.082	5.785	7.102	0.0428	0.034
PO-85		GEOROC	10.1016/j.lithos.2012.05.025	U-PB AGES AND GEOCHEMISTRY OF MAFIC DYKE SWARMS FROM THE UAUA BLOCK, SAO FRANCISCO CRATON, BRAZIL: LIPS REMNANTS RELEVANT FOR LATE ARCHAEAN	LITHOS	OLIVEIRA, E. P.; SILVEIRA, E. M.; SÖDERLUND, U.; ERNST, R. E.		-9.516	-39.284	0.01				TIMS_ID	METAMORPHIC	UNKNOWN	UNKNOWN	GNEISS																							57.118	9.913
PO-85		GEOROC	10.1016/j.lithos.2012.05.025	U-PB AGES AND GEOCHEMISTRY OF MAFIC DYKE SWARMS FROM THE UAUA BLOCK, SAO FRANCISCO CRATON, BRAZIL: LIPS REMNANTS RELEVANT FOR LATE ARCHAEAN	LITHOS	OLIVEIRA, E. P.; SILVEIRA, E. M.; SÖDERLUND, U.; ERNST, R. E.		-9.516	-39.284	0.01				TIMS	METAMORPHIC	UNKNOWN	UNKNOWN	GNEISS
PO-85		GEOROC	10.1016/j.lithos.2012.05.025	U-PB AGES AND GEOCHEMISTRY OF MAFIC DYKE SWARMS FROM THE UAUA BLOCK, SAO FRANCISCO CRATON, BRAZIL: LIPS REMNANTS RELEVANT FOR LATE ARCHAEAN	LITHOS	OLIVEIRA, E. P.; SILVEIRA, E. M.; SÖDERLUND, U.; ERNST, R. E.		-9.516	-39.284	0.01				IGN	METAMORPHIC	UNKNOWN	UNKNOWN	GNEISS														0.46
PO-85		GEOROC	10.1016/j.lithos.2012.05.025	U-PB AGES AND GEOCHEMISTRY OF MAFIC DYKE SWARMS FROM THE UAUA BLOCK, SAO FRANCISCO CRATON, BRAZIL: LIPS REMNANTS RELEVANT FOR LATE ARCHAEAN	LITHOS	OLIVEIRA, E. P.; SILVEIRA, E. M.; SÖDERLUND, U.; ERNST, R. E.		-9.516	-39.284	0.01				ICPMS	METAMORPHIC	UNKNOWN	UNKNOWN	GNEISS																			60.8		92.4		50.6
B-79-16C		GEOROC	10.1093/petrology/41.12.1805	GEOCHRONOLOGIC AND SR-ISOTOPIC STUDIES OF CERTAIN UNITS IN THE BARBERTON GRANITE-GREENSTONE TERRANE, SOUTH AFRICA	SPEC. PUBL. GEOL. SOC. S. AFR.	BARTON, J. M. JR.; ROBB, L. J.; ANHAEUSSER, C. R.; VAN NIEROP, D. A.		-25.6	31	0.01	2500	3175	3850	NOT GIVEN	METAMORPHIC	UNKNOWN	UNKNOWN	GNEISS
PE111		GEOROC	10.1007/BF02897481	ANDEAN CENOZOIC VOLCANISM: MAGMA GENESIS IN THE LIGHT OF STRONTIUM ISOTOPIC COMPOSITION AND TRACE ELEMENT GEOCHEMISTRY	YEAR BOOK CARNEGIE INST. WASHINGTON	JAMES, D. E.; BROOKS, C. K.; CUYUBAMBA, A.		-17.15	-69.85	0.01				NOT GIVEN	METAMORPHIC	UNKNOWN	UNKNOWN	GNEISS	68.1
PE111		GEOROC	10.1126/science.210.4475.1245	ORIGIN OF LEAD IN ANDEAN CALC-ALKALINE LAVAS, SOUTHERN PERU	SCIENCE	TILTON, G. R.; BAREIRO, B.		-17.15	-69.85	0.01				TIMS_ID	METAMORPHIC	UNKNOWN	UNKNOWN	GNEISS
PE111		GEOROC	10.1126/science.210.4475.1245	ORIGIN OF LEAD IN ANDEAN CALC-ALKALINE LAVAS, SOUTHERN PERU	SCIENCE	TILTON, G. R.; BAREIRO, B.		-17.15	-69.85	0.01				TIMS	METAMORPHIC	UNKNOWN	UNKNOWN	GNEISS
5024		GEOROC	10.1007/BF01132885	ELEMENTAL FINGERPRINTS OF ISOTOPIC CONTAMINATION OF HEBRIDEAN PALEOCENE MANTLE-DERIVED MAGMAS BY ARCHEAN SIAL	CONTRIB. MINERAL. PETROL.	THOMPSON, R. N.; DICKIN, A. P.; GIRSON, I. L.; MORRISON, M. A.		56.25	-6.4	0.01	542	1521	2500	XRF	METAMORPHIC	UNKNOWN	UNKNOWN	GNEISS
5024		GEOROC	10.1007/BF01132885	ELEMENTAL FINGERPRINTS OF ISOTOPIC CONTAMINATION OF HEBRIDEAN PALEOCENE MANTLE-DERIVED MAGMAS BY ARCHEAN SIAL	CONTRIB. MINERAL. PETROL.	THOMPSON, R. N.; DICKIN, A. P.; GIRSON, I. L.; MORRISON, M. A.		56.25	-6.4	0.01	542	1521	2500	TIMS	METAMORPHIC	UNKNOWN	UNKNOWN	GNEISS
5024		GEOROC	10.1007/BF01132885	ELEMENTAL FINGERPRINTS OF ISOTOPIC CONTAMINATION OF HEBRIDEAN PALEOCENE MANTLE-DERIVED MAGMAS BY ARCHEAN SIAL	CONTRIB. MINERAL. PETROL.	THOMPSON, R. N.; DICKIN, A. P.; GIRSON, I. L.; MORRISON, M. A.		56.25	-6.4	0.01	542	1521	2500	INAA	METAMORPHIC	UNKNOWN	UNKNOWN	GNEISS																			42.2		66.2		29.8	5.3	1.31	4.4	0.37
5024		GEOROC	10.1007/BF01132885	ELEMENTAL FINGERPRINTS OF ISOTOPIC CONTAMINATION OF HEBRIDEAN PALEOCENE MANTLE-DERIVED MAGMAS BY ARCHEAN SIAL	CONTRIB. MINERAL. PETROL.	THOMPSON, R. N.; DICKIN, A. P.; GIRSON, I. L.; MORRISON, M. A.		56.25	-6.4	0.01	542	1521	2500	ICPMS	METAMORPHIC	UNKNOWN	UNKNOWN	GNEISS
D2-1		GEOROC	10.1007/BF01132327	A 3500 MA PLUTONIC AND VOLCANIC CALC-ALKALINE PROVINCE IN THE ARCHEAN EAST PILBARA BLOCK	CONTRIB. MINERAL. PETROL.	BICKLE, M. J.; BETTENAY, M. E.; BARLEY, M. E.; CHAPMAN, N. A.; GROVES, D. I.; CAMPBELL, I. H.; DE LAETER, J. R.		-21.25	119.25	0.01	3500	3500	3500	XRF	METAMORPHIC	UNKNOWN	UNKNOWN	GNEISS	70.84	0.32	15.72	0.4				0.68	2.56	5.1	1.86	0.12	0.06
D2-1		GEOROC	10.1007/BF01132327	A 3500 MA PLUTONIC AND VOLCANIC CALC-ALKALINE PROVINCE IN THE ARCHEAN EAST PILBARA BLOCK	CONTRIB. MINERAL. PETROL.	BICKLE, M. J.; BETTENAY, M. E.; BARLEY, M. E.; CHAPMAN, N. A.; GROVES, D. I.; CAMPBELL, I. H.; DE LAETER, J. R.		-21.25	119.25	0.01	3500	3500	3500	WET	METAMORPHIC	UNKNOWN	UNKNOWN	GNEISS						1.9									0.54	0.09
D2-1		GEOROC	10.1007/BF01132327	A 3500 MA PLUTONIC AND VOLCANIC CALC-ALKALINE PROVINCE IN THE ARCHEAN EAST PILBARA BLOCK	CONTRIB. MINERAL. PETROL.	BICKLE, M. J.; BETTENAY, M. E.; BARLEY, M. E.; CHAPMAN, N. A.; GROVES, D. I.; CAMPBELL, I. H.; DE LAETER, J. R.		-21.25	119.25	0.01	3500	3500	3500	TIMS	METAMORPHIC	UNKNOWN	UNKNOWN	GNEISS
D2-1		GEOROC	10.1007/BF01132327	A 3500 MA PLUTONIC AND VOLCANIC CALC-ALKALINE PROVINCE IN THE ARCHEAN EAST PILBARA BLOCK	CONTRIB. MINERAL. PETROL.	BICKLE, M. J.; BETTENAY, M. E.; BARLEY, M. E.; CHAPMAN, N. A.; GROVES, D. I.; CAMPBELL, I. H.; DE LAETER, J. R.		-21.25	119.25	0.01	3500	3500	3500	INAA	METAMORPHIC	UNKNOWN	UNKNOWN	GNEISS																			53.7		103		38	6.04	1.12		0.48		0.4		0.31
PC-411		GEOROC	10.1093/petrology/egr014	IMPLICATIONS OF THE NUVVUAGITTUQ GREENSTONE BELT FOR THE FORMATION OF EARTHS EARLY CRUST	J. PETROL.	O^NEIL, J.; FRANCIS, D. M.; CARLSON, R. W.		58	-77	0.01				XRF	METAMORPHIC	UNKNOWN	UNKNOWN	GNEISS	48.39	0.384	18.3				11.0227	11.05	2.81	0.47	0.89	0.032	0.255
PC-411		GEOROC	10.1093/petrology/egr014	IMPLICATIONS OF THE NUVVUAGITTUQ GREENSTONE BELT FOR THE FORMATION OF EARTHS EARLY CRUST	J. PETROL.	O^NEIL, J.; FRANCIS, D. M.; CARLSON, R. W.		58	-77	0.01				IGN	METAMORPHIC	UNKNOWN	UNKNOWN	GNEISS														5.76
F25		GEOROC	10.1093/petrology/41.12.1805	RESOLVING CRUSTAL AND MANTLE CONTRIBUTIONS TO CONTINENTAL FLOOD VOLCANISM, YEMEN; CONSTRAINTS FROM MINERAL OXYGEN ISOTOPE DATA	J. PETROL.	BAKER, J. A.; MACPHERSON, C. G.; MENZIES, M. A.; THIRLWALL, M. F.; AL-KADASI, M.; MATTEY, D. P.		14	43	0.01				TIMS	METAMORPHIC	UNKNOWN	UNKNOWN	GNEISS
B-78-12F		GEOROC	10.1007/BF00287109	GEOCHRONOLOGIC AND SR-ISOTOPIC STUDIES OF CERTAIN UNITS IN THE BARBERTON GRANITE-GREENSTONE TERRANE, SOUTH AFRICA	SPEC. PUBL. GEOL. SOC. S. AFR.	BARTON, J. M. JR.; ROBB, L. J.; ANHAEUSSER, C. R.; VAN NIEROP, D. A.		-26.1	31	0.01	2500	3175	3850	NOT GIVEN	METAMORPHIC	UNKNOWN	UNKNOWN	GNEISS
283630		GEOROC	10.1130/G24868A.1	ACCRETION AND EVOLUTION OF AN ARCHEAN HIGH-GRADE GREY GNEISS-AMPHIBOLITE COMPLEX: THE FISKEFJORD AREA, SOUTHERN WEST GREENLAND	BULL. GEOL. GREENLAND SURV.	GARDE, A. A.		64.7238	-52.0089	0.01	2500	3175	3850	XRF	METAMORPHIC	UNKNOWN	UNKNOWN	GNEISS	52.63	1.1	19.07				8.79	3.53	7.95		0.27	0.3	0.13						11		27		18
283630		GEOROC	10.1130/G24868A.1	ACCRETION AND EVOLUTION OF AN ARCHEAN HIGH-GRADE GREY GNEISS-AMPHIBOLITE COMPLEX: THE FISKEFJORD AREA, SOUTHERN WEST GREENLAND	BULL. GEOL. GREENLAND SURV.	GARDE, A. A.		64.7238	-52.0089	0.01	2500	3175	3850	TIT	METAMORPHIC	UNKNOWN	UNKNOWN	GNEISS				4.06		5.14
283630		GEOROC	10.1130/G24868A.1	ACCRETION AND EVOLUTION OF AN ARCHEAN HIGH-GRADE GREY GNEISS-AMPHIBOLITE COMPLEX: THE FISKEFJORD AREA, SOUTHERN WEST GREENLAND	BULL. GEOL. GREENLAND SURV.	GARDE, A. A.		64.7238	-52.0089	0.01	2500	3175	3850	IGN	METAMORPHIC	UNKNOWN	UNKNOWN	GNEISS														1.05
283630		GEOROC	10.1130/G24868A.1	ACCRETION AND EVOLUTION OF AN ARCHEAN HIGH-GRADE GREY GNEISS-AMPHIBOLITE COMPLEX: THE FISKEFJORD AREA, SOUTHERN WEST GREENLAND	BULL. GEOL. GREENLAND SURV.	GARDE, A. A.		64.7238	-52.0089	0.01	2500	3175	3850	AAS	METAMORPHIC	UNKNOWN	UNKNOWN	GNEISS										5.02
DIORITIC GNEISS AMPH.		GEOROC	10.1093/PETROLOGY/EGT043	ACCRETION AND EVOLUTION OF AN ARCHEAN HIGH-GRADE GREY GNEISS-AMPHIBOLITE COMPLEX: THE FISKEFJORD AREA, SOUTHERN WEST GREENLAND	BULL. GEOL. GREENLAND SURV.	GARDE, A. A.		64.6	-50.9	0.01	2500	3175	3850	XRF	METAMORPHIC	UNKNOWN	UNKNOWN	GNEISS	60.67	0.63	16.53				5.67	3.42	5.87		1.51	0.2	0.1						24		38		17
DIORITIC GNEISS AMPH.		GEOROC	10.1093/PETROLOGY/EGT043	ACCRETION AND EVOLUTION OF AN ARCHEAN HIGH-GRADE GREY GNEISS-AMPHIBOLITE COMPLEX: THE FISKEFJORD AREA, SOUTHERN WEST GREENLAND	BULL. GEOL. GREENLAND SURV.	GARDE, A. A.		64.6	-50.9	0.01	2500	3175	3850	TIT	METAMORPHIC	UNKNOWN	UNKNOWN	GNEISS				1.54		4.29
DIORITIC GNEISS AMPH.		GEOROC	10.1093/PETROLOGY/EGT043	ACCRETION AND EVOLUTION OF AN ARCHEAN HIGH-GRADE GREY GNEISS-AMPHIBOLITE COMPLEX: THE FISKEFJORD AREA, SOUTHERN WEST GREENLAND	BULL. GEOL. GREENLAND SURV.	GARDE, A. A.		64.6	-50.9	0.01	2500	3175	3850	INAA	METAMORPHIC	UNKNOWN	UNKNOWN	GNEISS																			22.1		38		16	2.95	0.91		0.4
DIORITIC GNEISS AMPH.		GEOROC	10.1093/PETROLOGY/EGT043	ACCRETION AND EVOLUTION OF AN ARCHEAN HIGH-GRADE GREY GNEISS-AMPHIBOLITE COMPLEX: THE FISKEFJORD AREA, SOUTHERN WEST GREENLAND	BULL. GEOL. GREENLAND SURV.	GARDE, A. A.		64.6	-50.9	0.01	2500	3175	3850	IGN	METAMORPHIC	UNKNOWN	UNKNOWN	GNEISS														0.48
DIORITIC GNEISS AMPH.		GEOROC	10.1093/PETROLOGY/EGT043	ACCRETION AND EVOLUTION OF AN ARCHEAN HIGH-GRADE GREY GNEISS-AMPHIBOLITE COMPLEX: THE FISKEFJORD AREA, SOUTHERN WEST GREENLAND	BULL. GEOL. GREENLAND SURV.	GARDE, A. A.		64.6	-50.9	0.01	2500	3175	3850	AAS	METAMORPHIC	UNKNOWN	UNKNOWN	GNEISS										4.23
ABG-2		GEOROC	10.1016/S0016-7037(03)00447-2	NATURE OF THE ARCHEAN MIDCRUST IN THE CORE OF THE VREDEFORT DOME, CENTRAL KAAPVAAL CRATON, SOUTH AFRICA	GEOCHIM. COSMOCHIM. ACTA	LANA, C.; REIMOLD, W. U.; GIBSON, R. L.; KOEBERL, C.; SIEGESMUND, S.		-27	27.2	0.01	2020	2020	2020	XRF	METAMORPHIC	UNKNOWN	UNKNOWN	GNEISS	70.7	0.45	15.73		2.49			0.29	2.14	4.96	3.28	0.11	0.06
ABG-2		GEOROC	10.1016/S0016-7037(03)00447-2	NATURE OF THE ARCHEAN MIDCRUST IN THE CORE OF THE VREDEFORT DOME, CENTRAL KAAPVAAL CRATON, SOUTH AFRICA	GEOCHIM. COSMOCHIM. ACTA	LANA, C.; REIMOLD, W. U.; GIBSON, R. L.; KOEBERL, C.; SIEGESMUND, S.		-27	27.2	0.01	2020	2020	2020	INAA	METAMORPHIC	UNKNOWN	UNKNOWN	GNEISS																			71.5		128		48.8	5.61	1.32	4.77	0.58				0.23
ABG-2		GEOROC	10.1016/S0016-7037(03)00447-2	NATURE OF THE ARCHEAN MIDCRUST IN THE CORE OF THE VREDEFORT DOME, CENTRAL KAAPVAAL CRATON, SOUTH AFRICA	GEOCHIM. COSMOCHIM. ACTA	LANA, C.; REIMOLD, W. U.; GIBSON, R. L.; KOEBERL, C.; SIEGESMUND, S.		-27	27.2	0.01	2020	2020	2020	IGN	METAMORPHIC	UNKNOWN	UNKNOWN	GNEISS														0.52
W0-810		GEOROC	10.1007/s004100050097	ND ISOTOPIC EVIDENCE FOR JUVENILE CRUST IN THE CAROLINA TERRANE, SOUTHERN APPALACHIANS	CONTRIB. MINERAL. PETROL.	SAMSON, S. D.; HIBBARD, J. P.; WORTMAN, G. L.		36.39	-78.98	0.01	622	622	622	XRF	METAMORPHIC	UNKNOWN	UNKNOWN	GNEISS	72.76	0.32	14.2		2.07			0.42	1.67	4.48	2.86	0.065	0.07
W0-810		GEOROC	10.1007/s004100050097	ND ISOTOPIC EVIDENCE FOR JUVENILE CRUST IN THE CAROLINA TERRANE, SOUTHERN APPALACHIANS	CONTRIB. MINERAL. PETROL.	SAMSON, S. D.; HIBBARD, J. P.; WORTMAN, G. L.		36.39	-78.98	0.01	622	622	622	IGN	METAMORPHIC	UNKNOWN	UNKNOWN	GNEISS														0.67
GN2041		GEOROC	10.1016/0009-2541(95)00012-B	ND-SR ISOTOPIC AND GEOCHEMICAL CHARACTERISTICS OF TWO CONTRASTING TYPES OF CALC-ALKALINE PLUTONS IN THE HIDA BELT, JAPAN	CHEM. GEOL.	ARAKAWA, Y.; SHINMURA, T.		35.8	136	0.01	1990	1990	1990	XRF	METAMORPHIC	UNKNOWN	UNKNOWN	GNEISS
GN2041		GEOROC	10.1016/0009-2541(95)00012-B	ND-SR ISOTOPIC AND GEOCHEMICAL CHARACTERISTICS OF TWO CONTRASTING TYPES OF CALC-ALKALINE PLUTONS IN THE HIDA BELT, JAPAN	CHEM. GEOL.	ARAKAWA, Y.; SHINMURA, T.		35.8	136	0.01	1990	1990	1990	TIMS	METAMORPHIC	UNKNOWN	UNKNOWN	GNEISS
GN2041		GEOROC	10.1016/0009-2541(95)00012-B	ND-SR ISOTOPIC AND GEOCHEMICAL CHARACTERISTICS OF TWO CONTRASTING TYPES OF CALC-ALKALINE PLUTONS IN THE HIDA BELT, JAPAN	CHEM. GEOL.	ARAKAWA, Y.; SHINMURA, T.		35.8	136	0.01	1990	1990	1990	MS_ID	METAMORPHIC	UNKNOWN	UNKNOWN	GNEISS																							28.03	6.968
278774		GEOROC	10.1130/0091-7613(2000)28<580:AOPMPD>2.0.CO;2	ACCRETION AND EVOLUTION OF AN ARCHEAN HIGH-GRADE GREY GNEISS-AMPHIBOLITE COMPLEX: THE FISKEFJORD AREA, SOUTHERN WEST GREENLAND	BULL. GEOL. GREENLAND SURV.	GARDE, A. A.		64.9848	-51.1177	0.01	2500	3175	3850	EMP (EPMA)	METAMORPHIC	UNKNOWN	UNKNOWN	GNEISS		0.61
B-78-9B		GEOROC	10.1111/j.1755-6724.2003.tb00563.x	GEOCHRONOLOGIC AND SR-ISOTOPIC STUDIES OF CERTAIN UNITS IN THE BARBERTON GRANITE-GREENSTONE TERRANE, SOUTH AFRICA	SPEC. PUBL. GEOL. SOC. S. AFR.	BARTON, J. M. JR.; ROBB, L. J.; ANHAEUSSER, C. R.; VAN NIEROP, D. A.		-26.05	31	0.01	2500	3175	3850	NOT GIVEN	METAMORPHIC	UNKNOWN	UNKNOWN	GNEISS
F20		GEOROC	10.1007/BF00373681	GEOCHRONOLOGY OF AN ARCHAEAN TONALITIC GNEISS DOME IN NORTHERN FINLAND AND ITS RELATION WITH AN UNUSUAL OVERLYING VOLCANIC CONGLOMERATE AND KOMATIITIC GREENSTONE	CONTRIB. MINERAL. PETROL.	KRÖNER, A.; PUUSTINEN, K.; HICKMAN, M.		67.81	26.86	0.01	2500	3175	3850	WET	METAMORPHIC	UNKNOWN	UNKNOWN	GNEISS	70.01	0.45	15.02	1.84		1.32		0.74	2.43	4.66	2.34	0.1	0.03	0.99
17425		GEOROC	10.1080/00288306.1987.10422179	PETROGRAPHY AND ORIGIN OF METASEDIMENTARY XENOLITHS IN LAVAS FROM TONGARIRO VOLCANIC CENTRE	NEW ZEALAND J. GEOL. GEOPHYS.	GRAHAM, I. J.		-39.28	175.57	0.01				XRF	METAMORPHIC	UNKNOWN	UNKNOWN	GNEISS	50	1.1	25.6	3.7		3.7		3	4.3	4.6	3.8	0.3	0.1
17425		GEOROC	10.1080/00288306.1987.10422179	PETROGRAPHY AND ORIGIN OF METASEDIMENTARY XENOLITHS IN LAVAS FROM TONGARIRO VOLCANIC CENTRE	NEW ZEALAND J. GEOL. GEOPHYS.	GRAHAM, I. J.		-39.28	175.57	0.01				TIMS	METAMORPHIC	UNKNOWN	UNKNOWN	GNEISS
17425		GEOROC	10.1080/00288306.1987.10422179	PETROGRAPHY AND ORIGIN OF METASEDIMENTARY XENOLITHS IN LAVAS FROM TONGARIRO VOLCANIC CENTRE	NEW ZEALAND J. GEOL. GEOPHYS.	GRAHAM, I. J.		-39.28	175.57	0.01				IGN	METAMORPHIC	UNKNOWN	UNKNOWN	GNEISS														0.7
B-80-1I		GEOROC	10.1016/0012-821X(82)90197-2	GEOCHRONOLOGIC AND SR-ISOTOPIC STUDIES OF CERTAIN UNITS IN THE BARBERTON GRANITE-GREENSTONE TERRANE, SOUTH AFRICA	SPEC. PUBL. GEOL. SOC. S. AFR.	BARTON, J. M. JR.; ROBB, L. J.; ANHAEUSSER, C. R.; VAN NIEROP, D. A.		-26	31	0.01	2500	3175	3850	NOT GIVEN	METAMORPHIC	UNKNOWN	UNKNOWN	GNEISS
KU9		GEOROC	10.1016/0024-4937(94)90044-2	ARC RELATED JURASSIC IGNEOUS AND META-IGNEOUS ROCKS IN THE COSTAL CORDILLERA OF NORTHERN CHILE / REGION ANTOFAGASTA	LITHOS	LUCASSEN, F.; FRANZ, G.		-23.8	-70.5	0.01				NOT GIVEN	METAMORPHIC	UNKNOWN	UNKNOWN	GNEISS
SMZ-AMG-01		GEOROC	10.1017/S0016756809006244	TRACE ELEMENT AND ISOTOPE CONSTRAINTS ON CRUSTAL ANATEXIS BY UPWELLING MANTLE MELTS IN THE NORTH ATLANTIC IGNEOUS PROVINCE: AN EXAMPLE FROM THE ISLE OF RUM, NW SCOTLAND	GEOL. MAG.	MEYER, R.; NICOLL, G. R.; HERTOGEN, J.; TROLL, V. R.; ELLAM, R. M.; EMELEUS, C. H.		56.92	-6.25	0.01	542	1521	2500	ICPMS	METAMORPHIC	UNKNOWN	UNKNOWN	GNEISS																			29.9		60.6	7.2	26.6	4.63	1.05	3.75	0.57	2.99	0.58	1.61	0.25
FJ0110		GEOROC	10.1016/j.gr.2006.10.016	SHRIMP U-PB ZIRCON GEOCHRONOLOGY AND GEOCHEMISTRY OF METAVOLCANIC AND METASEDIMENTARY ROCKS IN NORTHWESTERN FUJIAN, CATHAYSIA BLOCK, CHINA: TECTONIC IMPLICATIONS AND THE NEED TO REDEFINE LITHOSTRATIGRAPHIC UNITS	GONDWANA RES.	WAN, YUSHENG; LIU, DUNYI; XU, MEIHUI; ZHUANG, JIANMIN; SONG, BIAO; SHI, YU-RUO; DU, LILIN		27.3	117.3	0.01	542	1521	2500	XRF	METAMORPHIC	UNKNOWN	UNKNOWN	GNEISS	75.67	0.42	9.49	0.88				1.99	0.64	0.25	2.32	0.47	0.05
FJ0110		GEOROC	10.1016/j.gr.2006.10.016	SHRIMP U-PB ZIRCON GEOCHRONOLOGY AND GEOCHEMISTRY OF METAVOLCANIC AND METASEDIMENTARY ROCKS IN NORTHWESTERN FUJIAN, CATHAYSIA BLOCK, CHINA: TECTONIC IMPLICATIONS AND THE NEED TO REDEFINE LITHOSTRATIGRAPHIC UNITS	GONDWANA RES.	WAN, YUSHENG; LIU, DUNYI; XU, MEIHUI; ZHUANG, JIANMIN; SONG, BIAO; SHI, YU-RUO; DU, LILIN		27.3	117.3	0.01	542	1521	2500	WET	METAMORPHIC	UNKNOWN	UNKNOWN	GNEISS						1.89											2.34
FJ0110		GEOROC	10.1016/j.gr.2006.10.016	SHRIMP U-PB ZIRCON GEOCHRONOLOGY AND GEOCHEMISTRY OF METAVOLCANIC AND METASEDIMENTARY ROCKS IN NORTHWESTERN FUJIAN, CATHAYSIA BLOCK, CHINA: TECTONIC IMPLICATIONS AND THE NEED TO REDEFINE LITHOSTRATIGRAPHIC UNITS	GONDWANA RES.	WAN, YUSHENG; LIU, DUNYI; XU, MEIHUI; ZHUANG, JIANMIN; SONG, BIAO; SHI, YU-RUO; DU, LILIN		27.3	117.3	0.01	542	1521	2500	MC_ICPMS_ID	METAMORPHIC	UNKNOWN	UNKNOWN	GNEISS																							27.59	5.382
FJ0110		GEOROC	10.1016/j.gr.2006.10.016	SHRIMP U-PB ZIRCON GEOCHRONOLOGY AND GEOCHEMISTRY OF METAVOLCANIC AND METASEDIMENTARY ROCKS IN NORTHWESTERN FUJIAN, CATHAYSIA BLOCK, CHINA: TECTONIC IMPLICATIONS AND THE NEED TO REDEFINE LITHOSTRATIGRAPHIC UNITS	GONDWANA RES.	WAN, YUSHENG; LIU, DUNYI; XU, MEIHUI; ZHUANG, JIANMIN; SONG, BIAO; SHI, YU-RUO; DU, LILIN		27.3	117.3	0.01	542	1521	2500	MC_ICPMS	METAMORPHIC	UNKNOWN	UNKNOWN	GNEISS
FJ0110		GEOROC	10.1016/j.gr.2006.10.016	SHRIMP U-PB ZIRCON GEOCHRONOLOGY AND GEOCHEMISTRY OF METAVOLCANIC AND METASEDIMENTARY ROCKS IN NORTHWESTERN FUJIAN, CATHAYSIA BLOCK, CHINA: TECTONIC IMPLICATIONS AND THE NEED TO REDEFINE LITHOSTRATIGRAPHIC UNITS	GONDWANA RES.	WAN, YUSHENG; LIU, DUNYI; XU, MEIHUI; ZHUANG, JIANMIN; SONG, BIAO; SHI, YU-RUO; DU, LILIN		27.3	117.3	0.01	542	1521	2500	ICPMS	METAMORPHIC	UNKNOWN	UNKNOWN	GNEISS																			26.62		39.96	5.53	25.59	5.87	1.12	7.41	1.23	6.55	1.51	4.43	0.62
P43-1		GEOROC	10.1016/S0040-1951(00)00177-3	FORMATION OF POSITIVE EPSILON_ND (T) GRANITOIDS FROM THE ALATAW MOUNTAINS, XINJIANG, CHINA, BY MIXING AND FRACTIONAL CRYSTALLIZATION: IMPLICATION FOR PHANEROZOIC CRUSTAL GROWTH	TECTONOPHYSICS	CHEN, JIANGFENG; ZHOU, TAIXI; XIE, ZHI; ZHANG, XUN; GUO, XINSHENG		44.8	81	0.01	542	1521	2500	WET	METAMORPHIC	UNKNOWN	UNKNOWN	GNEISS	64.36	0.08	19.31	0.45		0.54		0.01	0.58	5.97	6.95	0.04	0.58	1			0.24
P43-1		GEOROC	10.1016/S0040-1951(00)00177-3	FORMATION OF POSITIVE EPSILON_ND (T) GRANITOIDS FROM THE ALATAW MOUNTAINS, XINJIANG, CHINA, BY MIXING AND FRACTIONAL CRYSTALLIZATION: IMPLICATION FOR PHANEROZOIC CRUSTAL GROWTH	TECTONOPHYSICS	CHEN, JIANGFENG; ZHOU, TAIXI; XIE, ZHI; ZHANG, XUN; GUO, XINSHENG		44.8	81	0.01	542	1521	2500	TIMS_ID	METAMORPHIC	UNKNOWN	UNKNOWN	GNEISS																							4.36	1.35
P43-1		GEOROC	10.1016/S0040-1951(00)00177-3	FORMATION OF POSITIVE EPSILON_ND (T) GRANITOIDS FROM THE ALATAW MOUNTAINS, XINJIANG, CHINA, BY MIXING AND FRACTIONAL CRYSTALLIZATION: IMPLICATION FOR PHANEROZOIC CRUSTAL GROWTH	TECTONOPHYSICS	CHEN, JIANGFENG; ZHOU, TAIXI; XIE, ZHI; ZHANG, XUN; GUO, XINSHENG		44.8	81	0.01	542	1521	2500	TIMS	METAMORPHIC	UNKNOWN	UNKNOWN	GNEISS
P43-1		GEOROC	10.1016/S0040-1951(00)00177-3	FORMATION OF POSITIVE EPSILON_ND (T) GRANITOIDS FROM THE ALATAW MOUNTAINS, XINJIANG, CHINA, BY MIXING AND FRACTIONAL CRYSTALLIZATION: IMPLICATION FOR PHANEROZOIC CRUSTAL GROWTH	TECTONOPHYSICS	CHEN, JIANGFENG; ZHOU, TAIXI; XIE, ZHI; ZHANG, XUN; GUO, XINSHENG		44.8	81	0.01	542	1521	2500	ICPAES	METAMORPHIC	UNKNOWN	UNKNOWN	GNEISS																			3.17		6.97	1.05	3.81	1.18	0.23	1.39	0.29	2.5	0.58	1.93	0.28
OES-99-25		GEOROC	10.1016/S0301-9268(02)00026-8	U-PB GEOCHRONOLOGY AND GEOCHEMISTRY OF EARLY PROTEROZOIC ROCKS OF THE TECTONIC BASEMENT WINDOWS IN CENTRAL NORDLAND, CALEDONIDES OF NORTH-CENTRAL NORWAY	PREC. RESEARCH	SKAR, O.		66.5	12	0.01				XRF	METAMORPHIC	UNKNOWN	UNKNOWN	GNEISS	53.63	0.11	28.03		1.26			0.66	10.92	4.65	0.48	0.1	0.01						0		24		0
OES-99-25		GEOROC	10.1016/S0301-9268(02)00026-8	U-PB GEOCHRONOLOGY AND GEOCHEMISTRY OF EARLY PROTEROZOIC ROCKS OF THE TECTONIC BASEMENT WINDOWS IN CENTRAL NORDLAND, CALEDONIDES OF NORTH-CENTRAL NORWAY	PREC. RESEARCH	SKAR, O.		66.5	12	0.01				IGN	METAMORPHIC	UNKNOWN	UNKNOWN	GNEISS														0.46
G93-17		GEOROC	10.2113/gsecongeo.90.5.1217	RARE EARTH ELEMENT GEOCHEMISTRY OF THE METAMORPHOSED VOLCANOGENIC MASSIVE SULFIDE DEPOSITS OF THE MANITOUWADGE MINING CAMP, SUPERIOR PROVINCE, CANADA: A POTENTIAL EXPLORATION TOOL?	ECON. GEOL.	SCHANDL, E. S.; GORTON, M. P.; WASTENEYS, H A.		49.2	-85.83	0.01	2500	3175	3850	INAA	METAMORPHIC	UNKNOWN	UNKNOWN	GNEISS					8.45					3.44									65.99		156.66		63.14	12.73	3.12		1.01
8		GEOROC	10.1093/petrology/egu044	GEOLOGY AND GEOCHEMISTRY OF NUGGIHALLI SCHIST BELT, DHARWAR CRATON, KARNATAKA, INDIA	MEM. GEOL. SOC. INDIA	JAFRI, S. H.; KHAN, N.; AHMED, S. M.; SAXENA, R.		12.92	76.33	0.01	2500	3175	3850	NOT GIVEN	METAMORPHIC	UNKNOWN	UNKNOWN	GNEISS	70.79	0.1	11.98	2.2		4.24		1.05	2.9	2.97	1.18	0.24	0.21	0.15
510772		GEOROC	10.1016/j.gr.2011.11.006	REMNANTS OF ARC-RELATED MESOARCHAEAN OCEANIC CRUST IN THE TARTOQ GROUP OF SW GREENLAND	GONDWANA RES.	SZILAS, K.; VAN HINSBERG, V.; KISTERS, A. F. M.; HOFFMANN, J. E.; WINDLEY, B. F.; KOKFELT, T. F.; SCHERSTEN, A.; FREI, R.; ROSING, M. T.; MÜNKER, C.		61.6462	-48.3084	0.01				IGN	METAMORPHIC	UNKNOWN	UNKNOWN	GNEISS														4.2
510772		GEOROC	10.1016/j.gr.2011.11.006	REMNANTS OF ARC-RELATED MESOARCHAEAN OCEANIC CRUST IN THE TARTOQ GROUP OF SW GREENLAND	GONDWANA RES.	SZILAS, K.; VAN HINSBERG, V.; KISTERS, A. F. M.; HOFFMANN, J. E.; WINDLEY, B. F.; KOKFELT, T. F.; SCHERSTEN, A.; FREI, R.; ROSING, M. T.; MÜNKER, C.		61.6462	-48.3084	0.01				ICPMS	METAMORPHIC	UNKNOWN	UNKNOWN	GNEISS																			18		36	4.02	15.2	3.04	1.32	3.01	0.47	2.41	0.49	1.16	0.18
510772		GEOROC	10.1016/j.gr.2011.11.006	REMNANTS OF ARC-RELATED MESOARCHAEAN OCEANIC CRUST IN THE TARTOQ GROUP OF SW GREENLAND	GONDWANA RES.	SZILAS, K.; VAN HINSBERG, V.; KISTERS, A. F. M.; HOFFMANN, J. E.; WINDLEY, B. F.; KOKFELT, T. F.; SCHERSTEN, A.; FREI, R.; ROSING, M. T.; MÜNKER, C.		61.6462	-48.3084	0.01				ICPAES	METAMORPHIC	UNKNOWN	UNKNOWN	GNEISS	59.34	0.47	17.61		5.67			3.68	3.47	3.44	1.74	0.1	0.07					0.015
BEL-02		GEOROC	10.1029/2007GC001925	COMPOSITION AND STRUCTURAL CONTROL OF CRUSTAL DOMAINS IN THE CENTRAL ANDES	GEOCHEMISTRY GEOPHYSICS GEOSYSTEMS	MAMANI, M.; TASSARA, A.; WÖRNER, G.		-18.4833	-69.5167	0.01	251	396.5	542	TIMS	METAMORPHIC	UNKNOWN	UNKNOWN	GNEISS
B-77-38G		GEOROC	10.1007/BF00371529	GEOCHRONOLOGIC AND SR-ISOTOPIC STUDIES OF CERTAIN UNITS IN THE BARBERTON GRANITE-GREENSTONE TERRANE, SOUTH AFRICA	SPEC. PUBL. GEOL. SOC. S. AFR.	BARTON, J. M. JR.; ROBB, L. J.; ANHAEUSSER, C. R.; VAN NIEROP, D. A.		-26	31	0.01	2500	3175	3850	NOT GIVEN	METAMORPHIC	UNKNOWN	UNKNOWN	GNEISS
A-89-56B		GEOROC	10.1016/0301-9268(94)90102-3	GEOCHEMICAL EVOLUTION OF THE MINTO BLOCK: A 2.7 GA CONTINENTAL MAGMATIC ARC BUILT ON THE SUPERIOR PROTO-CRATON	PREC. RESEARCH	STERN, R. A.; PERCIVAL, J. A.; MORTENSEN, J. K.		57.4917	-74.275	0.01	2500	3175	3850	TIMS_ID	METAMORPHIC	UNKNOWN	UNKNOWN	GNEISS																							28.262	3.638
A-89-56B		GEOROC	10.1016/0301-9268(94)90102-3	GEOCHEMICAL EVOLUTION OF THE MINTO BLOCK: A 2.7 GA CONTINENTAL MAGMATIC ARC BUILT ON THE SUPERIOR PROTO-CRATON	PREC. RESEARCH	STERN, R. A.; PERCIVAL, J. A.; MORTENSEN, J. K.		57.4917	-74.275	0.01	2500	3175	3850	TIMS	METAMORPHIC	UNKNOWN	UNKNOWN	GNEISS
G148		GEOROC	10.1007/BF00378107	A 2.5 GA. REWORKED SIALIC CRUST: RB-SR AND ISOTOPIC GEOCHEMISTRY OF LATE ARCHAEAN VOLCANIC AND PLUTONIC ROCKS FROM E. FINLAND	CONTRIB. MINERAL. PETROL.	MARTIN, H.; QUERRE, G.		64.44	29.06	0.01	2430	2500	2570	TIMS_ID	METAMORPHIC	UNKNOWN	UNKNOWN	GNEISS
G148		GEOROC	10.1007/BF00378107	A 2.5 GA. REWORKED SIALIC CRUST: RB-SR AND ISOTOPIC GEOCHEMISTRY OF LATE ARCHAEAN VOLCANIC AND PLUTONIC ROCKS FROM E. FINLAND	CONTRIB. MINERAL. PETROL.	MARTIN, H.; QUERRE, G.		64.44	29.06	0.01	2430	2500	2570	TIMS	METAMORPHIC	UNKNOWN	UNKNOWN	GNEISS
G92-20		GEOROC	10.2113/gsecongeo.90.5.1217	RARE EARTH ELEMENT GEOCHEMISTRY OF THE METAMORPHOSED VOLCANOGENIC MASSIVE SULFIDE DEPOSITS OF THE MANITOUWADGE MINING CAMP, SUPERIOR PROVINCE, CANADA: A POTENTIAL EXPLORATION TOOL?	ECON. GEOL.	SCHANDL, E. S.; GORTON, M. P.; WASTENEYS, H A.		49.2	-85.83	0.01	2500	3175	3850	INAA	METAMORPHIC	UNKNOWN	UNKNOWN	GNEISS					2.64					4.69									21.67		54.93		19.55	3.54	0.96		0.22
MILT-15		GEOROC	10.1086/314411	U-PB GEOCHRONOLOGIC, ND ISOTOPIC, AND GEOCHEMICAL EVIDENCE FOR THE CORRELATION OF THE CHOPAWAMSIC AND MILTON TERRANES, PIEDMONT ZONE, SOUTHERN APPALACHIAN OROGEN	J. GEOL.	COLER, D. G.; WORTMAN, G. L.; SAMSON, S. D.; HIBBARD, J. P.; STERN, RICHARD		36.6	-78.3	0.01	444	466	488	TIMS_ID	METAMORPHIC	UNKNOWN	UNKNOWN	GNEISS																							28.45	5.82
MILT-15		GEOROC	10.1086/314411	U-PB GEOCHRONOLOGIC, ND ISOTOPIC, AND GEOCHEMICAL EVIDENCE FOR THE CORRELATION OF THE CHOPAWAMSIC AND MILTON TERRANES, PIEDMONT ZONE, SOUTHERN APPALACHIAN OROGEN	J. GEOL.	COLER, D. G.; WORTMAN, G. L.; SAMSON, S. D.; HIBBARD, J. P.; STERN, RICHARD		36.6	-78.3	0.01	444	466	488	TIMS	METAMORPHIC	UNKNOWN	UNKNOWN	GNEISS
68081902		GEOROC	10.1029/TC008i004p00881	ON THE RYOKE GRANITIC AND METAMORPHIC ROCKS IN THE TOYONE-MURA AREA, AICHI PREFECTURE, JAPAN	MEM. FAC. SCI., KYOTO UNIV., SER. GEOL. MINERAL.	KUTSUKAKE, T.		34.5	137	0.01				NOT GIVEN	METAMORPHIC	UNKNOWN	UNKNOWN	GNEISS	67.42	0.88	14.27	1.63		4.95		2.33	1.88	1.67	3.85	0.02	0.22		1.23	0.04
PC-163		GEOROC	10.1093/petrology/egr014	IMPLICATIONS OF THE NUVVUAGITTUQ GREENSTONE BELT FOR THE FORMATION OF EARTHS EARLY CRUST	J. PETROL.	O^NEIL, J.; FRANCIS, D. M.; CARLSON, R. W.		58	-77	0.01				XRF	METAMORPHIC	UNKNOWN	UNKNOWN	GNEISS	52.82	0.421	19.19				9.41201	6.97	2.3	2.31	1.74	0.034	0.287
PC-163		GEOROC	10.1093/petrology/egr014	IMPLICATIONS OF THE NUVVUAGITTUQ GREENSTONE BELT FOR THE FORMATION OF EARTHS EARLY CRUST	J. PETROL.	O^NEIL, J.; FRANCIS, D. M.; CARLSON, R. W.		58	-77	0.01				IGN	METAMORPHIC	UNKNOWN	UNKNOWN	GNEISS														4
MAS 272		GEOROC	10.1029/91JB01640	CRUSTAL GROWTH IN WEST AFRICA AT 2.1 GA	J. GEOPHYS. RES.	BOHER, M.; ABOUCHAMI, W.; MICHARD, A.; ALBAREDE, F.; ARNDT, N. T.		23.25	-10	0.01	542	1521	2500	TIMS_ID	METAMORPHIC	UNKNOWN	UNKNOWN	GNEISS																							23.3	4.3
MAS 272		GEOROC	10.1029/91JB01640	CRUSTAL GROWTH IN WEST AFRICA AT 2.1 GA	J. GEOPHYS. RES.	BOHER, M.; ABOUCHAMI, W.; MICHARD, A.; ALBAREDE, F.; ARNDT, N. T.		23.25	-10	0.01	542	1521	2500	TIMS	METAMORPHIC	UNKNOWN	UNKNOWN	GNEISS
N14		GEOROC	10.1016/0012-821X(93)90058-H	ARCHAEAN CRUSTAL EVOLUTION OF THE CENTRAL KAAPVAAL CRATON, SOUTH AFRICA; EVIDENCE FROM THE JOHANNESBURG DOME	UNIV. WITWATERSRAND ECON. GEOL. RES. INF. CIRC.	ANHAEUSSER, C. R.		-26.13	25.63	0.01	2500	3175	3850	XRF	METAMORPHIC	UNKNOWN	UNKNOWN	GNEISS	70.61	0.32	15.61	0.38		1.91		0.82	3.07	5.96	0.96	0.08	0.05
N14		GEOROC	10.1016/0012-821X(93)90058-H	ARCHAEAN CRUSTAL EVOLUTION OF THE CENTRAL KAAPVAAL CRATON, SOUTH AFRICA; EVIDENCE FROM THE JOHANNESBURG DOME	UNIV. WITWATERSRAND ECON. GEOL. RES. INF. CIRC.	ANHAEUSSER, C. R.		-26.13	25.63	0.01	2500	3175	3850	IGN	METAMORPHIC	UNKNOWN	UNKNOWN	GNEISS														0.58
N14		GEOROC	10.1016/0012-821X(93)90058-H	ARCHAEAN CRUSTAL EVOLUTION OF THE CENTRAL KAAPVAAL CRATON, SOUTH AFRICA; EVIDENCE FROM THE JOHANNESBURG DOME	UNIV. WITWATERSRAND ECON. GEOL. RES. INF. CIRC.	ANHAEUSSER, C. R.		-26.13	25.63	0.01	2500	3175	3850	ICPMS	METAMORPHIC	UNKNOWN	UNKNOWN	GNEISS																			21		41.7	4.44	15.7	2.44	0.77	1.52	0.17	0.79	0.13	0.33	0.05
N14		GEOROC	10.1016/0012-821X(93)90058-H	ARCHEAN CRUSTAL EVOLUTION OF THE CENTRAL KAAPVAAL CRATON, SOUTH AFRICA: EVIDENCE FROM THE JOHANNESBURG DOME	S. AFR. J. GEOL.	ANHAEUSSER, C. R.		-26.13	25.63	0.01	2500	3175	3850	XRF	METAMORPHIC	UNKNOWN	UNKNOWN	GNEISS	70.61	0.32	15.61	0.38		1.91		0.82	3.07	5.96	0.96	0.08	0.05
N14		GEOROC	10.1016/0012-821X(93)90058-H	ARCHEAN CRUSTAL EVOLUTION OF THE CENTRAL KAAPVAAL CRATON, SOUTH AFRICA: EVIDENCE FROM THE JOHANNESBURG DOME	S. AFR. J. GEOL.	ANHAEUSSER, C. R.		-26.13	25.63	0.01	2500	3175	3850	IGN	METAMORPHIC	UNKNOWN	UNKNOWN	GNEISS														0.58
N14		GEOROC	10.1016/0012-821X(93)90058-H	ARCHEAN CRUSTAL EVOLUTION OF THE CENTRAL KAAPVAAL CRATON, SOUTH AFRICA: EVIDENCE FROM THE JOHANNESBURG DOME	S. AFR. J. GEOL.	ANHAEUSSER, C. R.		-26.13	25.63	0.01	2500	3175	3850	ICPMS	METAMORPHIC	UNKNOWN	UNKNOWN	GNEISS																			21		41.7	4.44	15.7	2.44	0.77	1.52	0.17	0.79	0.13	0.33	0.05
GR04055		GEOROC	10.1016/j.gca.2006.05.014	CHEMICAL AND ISOTOPIC EVIDENCE FOR WIDESPREAD EOARCHEAN METASEDIMENTARY ENCLAVES IN SOUTHERN WEST GREENLAND	GEOCHIM. COSMOCHIM. ACTA	CATES, N. L.; MOJZSIS, S. J.		64	-52	0.01				NOT GIVEN	METAMORPHIC	UNKNOWN	UNKNOWN	GNEISS	64.33	0.33	16.91		5.05			2.94	3.29	3.94	2.38	0.07	0.06	0.8					20		40	4.6	17	2.7	0.85	1.7	0.21	1.1	0.19	0.51	0.073
B-78-10D		GEOROC	10.1093/petrology/29.2.333	GEOCHRONOLOGIC AND SR-ISOTOPIC STUDIES OF CERTAIN UNITS IN THE BARBERTON GRANITE-GREENSTONE TERRANE, SOUTH AFRICA	SPEC. PUBL. GEOL. SOC. S. AFR.	BARTON, J. M. JR.; ROBB, L. J.; ANHAEUSSER, C. R.; VAN NIEROP, D. A.		-26.05	31	0.01	2500	3175	3850	NOT GIVEN	METAMORPHIC	UNKNOWN	UNKNOWN	GNEISS
PC-402		GEOROC	10.1093/petrology/egr014	IMPLICATIONS OF THE NUVVUAGITTUQ GREENSTONE BELT FOR THE FORMATION OF EARTHS EARLY CRUST	J. PETROL.	O^NEIL, J.; FRANCIS, D. M.; CARLSON, R. W.		58	-77	0.01				XRF	METAMORPHIC	UNKNOWN	UNKNOWN	GNEISS	66.62	0.321	15.3				5.06593	3.01	4.72	1.56	1.1	0.032	0.119
PC-402		GEOROC	10.1093/petrology/egr014	IMPLICATIONS OF THE NUVVUAGITTUQ GREENSTONE BELT FOR THE FORMATION OF EARTHS EARLY CRUST	J. PETROL.	O^NEIL, J.; FRANCIS, D. M.; CARLSON, R. W.		58	-77	0.01				IGN	METAMORPHIC	UNKNOWN	UNKNOWN	GNEISS														2
PC-402		GEOROC	10.1093/petrology/egr014	IMPLICATIONS OF THE NUVVUAGITTUQ GREENSTONE BELT FOR THE FORMATION OF EARTHS EARLY CRUST	J. PETROL.	O^NEIL, J.; FRANCIS, D. M.; CARLSON, R. W.		58	-77	0.01				ICPMS	METAMORPHIC	UNKNOWN	UNKNOWN	GNEISS																			3.79		5.99	0.71	2.89	0.7	0.42	0.98	0.19	1.27	0.28	0.9	0.148
MAZ-24		GEOROC	10.1016/S0024-4937(99)00003-1	SR AND O ISOTOPE CONSTRAINTS ON SOURCE AND CRUSTAL CONTAMINATION IN THE HIGH-K CALC-ALKALINE AND SHOSHONITIC NEOGENE VOLCANIC ROCKS OF SE SPAIN	LITHOS	BENITO GARCIA, R.; LOPEZ RUIZ, J.; CEBRIA, J.-M.; HERTOGEN, J.; DOBLAS, M.; OYARZUN, R.; DEMAIFFE, D.		37.6	-1.32	0.01	5	11	17	XRF	METAMORPHIC	UNKNOWN	UNKNOWN	GNEISS	42.05	1.48	33.9		11.12			2.62	2.73	1.4	1.58	0.26	0.22
MAZ-24		GEOROC	10.1016/S0024-4937(99)00003-1	SR AND O ISOTOPE CONSTRAINTS ON SOURCE AND CRUSTAL CONTAMINATION IN THE HIGH-K CALC-ALKALINE AND SHOSHONITIC NEOGENE VOLCANIC ROCKS OF SE SPAIN	LITHOS	BENITO GARCIA, R.; LOPEZ RUIZ, J.; CEBRIA, J.-M.; HERTOGEN, J.; DOBLAS, M.; OYARZUN, R.; DEMAIFFE, D.		37.6	-1.32	0.01	5	11	17	INAA	METAMORPHIC	UNKNOWN	UNKNOWN	GNEISS																			69.3		145		61	11.7	4.68		1.51
MAZ-24		GEOROC	10.1016/S0024-4937(99)00003-1	SR AND O ISOTOPE CONSTRAINTS ON SOURCE AND CRUSTAL CONTAMINATION IN THE HIGH-K CALC-ALKALINE AND SHOSHONITIC NEOGENE VOLCANIC ROCKS OF SE SPAIN	LITHOS	BENITO GARCIA, R.; LOPEZ RUIZ, J.; CEBRIA, J.-M.; HERTOGEN, J.; DOBLAS, M.; OYARZUN, R.; DEMAIFFE, D.		37.6	-1.32	0.01	5	11	17	IGN	METAMORPHIC	UNKNOWN	UNKNOWN	GNEISS														2.58
512270		GEOROC	10.1016/j.gr.2011.11.006	REMNANTS OF ARC-RELATED MESOARCHAEAN OCEANIC CRUST IN THE TARTOQ GROUP OF SW GREENLAND	GONDWANA RES.	SZILAS, K.; VAN HINSBERG, V.; KISTERS, A. F. M.; HOFFMANN, J. E.; WINDLEY, B. F.; KOKFELT, T. F.; SCHERSTEN, A.; FREI, R.; ROSING, M. T.; MÜNKER, C.		61.44	-48.78	0.01				IGN	METAMORPHIC	UNKNOWN	UNKNOWN	GNEISS														0.2
512270		GEOROC	10.1016/j.gr.2011.11.006	REMNANTS OF ARC-RELATED MESOARCHAEAN OCEANIC CRUST IN THE TARTOQ GROUP OF SW GREENLAND	GONDWANA RES.	SZILAS, K.; VAN HINSBERG, V.; KISTERS, A. F. M.; HOFFMANN, J. E.; WINDLEY, B. F.; KOKFELT, T. F.; SCHERSTEN, A.; FREI, R.; ROSING, M. T.; MÜNKER, C.		61.44	-48.78	0.01				ICPMS	METAMORPHIC	UNKNOWN	UNKNOWN	GNEISS																			17.3		46.1	5.93	24.5	4.54	0.53	3.51	0.53	2.85	0.55	1.5	0.25
512270		GEOROC	10.1016/j.gr.2011.11.006	REMNANTS OF ARC-RELATED MESOARCHAEAN OCEANIC CRUST IN THE TARTOQ GROUP OF SW GREENLAND	GONDWANA RES.	SZILAS, K.; VAN HINSBERG, V.; KISTERS, A. F. M.; HOFFMANN, J. E.; WINDLEY, B. F.; KOKFELT, T. F.; SCHERSTEN, A.; FREI, R.; ROSING, M. T.; MÜNKER, C.		61.44	-48.78	0.01				ICPAES	METAMORPHIC	UNKNOWN	UNKNOWN	GNEISS	77.53	0.06	12.33		1.1			0.16	0.19	4.17	4.13	0.01	0.02					0
306-11		GEOROC	10.1016/j.gr.2009.09.001	ROLE OF THE OLLO DE SAPO MASSIVE FELSIC VOLCANISM OF NW IBERIA IN THE EARLY ORDOVICIAN DYNAMICS OF NORTHERN GONDWANA	GONDWANA RES.	DIEZ MONTES, A.; MARTINEZ CATALAN, J. R.; MULAS, F. B.		42.05	-6.63	0.01	472	480	488	NOT GIVEN	METAMORPHIC	UNKNOWN	UNKNOWN	GNEISS	69.18	0.4	15.38		3.36			1.15	0.74	2.9	4.43	0.18	0.05	1.78					28.5		55.45	7.79	26.34	4.74	1.03	5.04		4.74		2.84
AS68		GEOROC	10.1016/0899-5362(93)90027-N	THE PETROLOGY, GEOCHEMISTRY AND PETROGENESIS OF THE EDOUGH IGNEOUS ROCKS, ANNABA, NE ALGERIA	J. AFR. EARTH SCI.	AHMED-SAID, Y.; LEAKE, B. E.; ROGERS, G.		36.88	7.62	0.01	0	32.75	65.5	TIMS_ID	METAMORPHIC	UNKNOWN	UNKNOWN	GNEISS
AS68		GEOROC	10.1016/0899-5362(93)90027-N	THE PETROLOGY, GEOCHEMISTRY AND PETROGENESIS OF THE EDOUGH IGNEOUS ROCKS, ANNABA, NE ALGERIA	J. AFR. EARTH SCI.	AHMED-SAID, Y.; LEAKE, B. E.; ROGERS, G.		36.88	7.62	0.01	0	32.75	65.5	TIMS	METAMORPHIC	UNKNOWN	UNKNOWN	GNEISS
N6		GEOROC	10.1016/j.lithos.2010.08.026	ARCHAEAN CRUSTAL EVOLUTION OF THE CENTRAL KAAPVAAL CRATON, SOUTH AFRICA; EVIDENCE FROM THE JOHANNESBURG DOME	UNIV. WITWATERSRAND ECON. GEOL. RES. INF. CIRC.	ANHAEUSSER, C. R.		-26.13	25.63	0.01	2500	3175	3850	XRF	METAMORPHIC	UNKNOWN	UNKNOWN	GNEISS	54.27	0.76	15.89	1.38		6.88		5.96	8.99	3.94	0.49	0.1	0.14
N6		GEOROC	10.1016/j.lithos.2010.08.026	ARCHAEAN CRUSTAL EVOLUTION OF THE CENTRAL KAAPVAAL CRATON, SOUTH AFRICA; EVIDENCE FROM THE JOHANNESBURG DOME	UNIV. WITWATERSRAND ECON. GEOL. RES. INF. CIRC.	ANHAEUSSER, C. R.		-26.13	25.63	0.01	2500	3175	3850	IGN	METAMORPHIC	UNKNOWN	UNKNOWN	GNEISS														0.9
N6		GEOROC	10.1016/j.lithos.2010.08.026	ARCHEAN CRUSTAL EVOLUTION OF THE CENTRAL KAAPVAAL CRATON, SOUTH AFRICA: EVIDENCE FROM THE JOHANNESBURG DOME	S. AFR. J. GEOL.	ANHAEUSSER, C. R.		-26.13	25.63	0.01	2500	3175	3850	XRF	METAMORPHIC	UNKNOWN	UNKNOWN	GNEISS	54.27	0.76	15.89	1.38		6.88		5.96	8.99	3.94	0.49	0.1	0.14
N6		GEOROC	10.1016/j.lithos.2010.08.026	ARCHEAN CRUSTAL EVOLUTION OF THE CENTRAL KAAPVAAL CRATON, SOUTH AFRICA: EVIDENCE FROM THE JOHANNESBURG DOME	S. AFR. J. GEOL.	ANHAEUSSER, C. R.		-26.13	25.63	0.01	2500	3175	3850	IGN	METAMORPHIC	UNKNOWN	UNKNOWN	GNEISS														0.9
IBG488		GEOROC	10.1093/petrology/egp045	RB-SR WHOLE-ROCK AGE OF PERALKALINE ACIDIC VOLCANICS IN THE MACEDO DE CAVALEIROS AREA, TRÁS-OS-MONTES (NE PORTUGAL)	COMUNICACOES SERV. GEOL. PORTUGAL	RIBEIRO, M. L.; PRIEM, H. N. A.; BOELRIJK, N. A. I. M.; SCHERMERHORN, L. J. G.		41.53	-6.95	0.01	473	473	473	XRF	METAMORPHIC	UNKNOWN	UNKNOWN	GNEISS
IBG488		GEOROC	10.1093/petrology/egp045	RB-SR WHOLE-ROCK AGE OF PERALKALINE ACIDIC VOLCANICS IN THE MACEDO DE CAVALEIROS AREA, TRÁS-OS-MONTES (NE PORTUGAL)	COMUNICACOES SERV. GEOL. PORTUGAL	RIBEIRO, M. L.; PRIEM, H. N. A.; BOELRIJK, N. A. I. M.; SCHERMERHORN, L. J. G.		41.53	-6.95	0.01	473	473	473	TIMS	METAMORPHIC	UNKNOWN	UNKNOWN	GNEISS
PC-277		GEOROC	10.1093/petrology/egr014	IMPLICATIONS OF THE NUVVUAGITTUQ GREENSTONE BELT FOR THE FORMATION OF EARTHS EARLY CRUST	J. PETROL.	O^NEIL, J.; FRANCIS, D. M.; CARLSON, R. W.		58	-77	0.01				XRF	METAMORPHIC	UNKNOWN	UNKNOWN	GNEISS	63.11	0.53	15.62				7.43243	3.91	0.72	0.12	4.42	0.055	0.132
PC-277		GEOROC	10.1093/petrology/egr014	IMPLICATIONS OF THE NUVVUAGITTUQ GREENSTONE BELT FOR THE FORMATION OF EARTHS EARLY CRUST	J. PETROL.	O^NEIL, J.; FRANCIS, D. M.; CARLSON, R. W.		58	-77	0.01				IGN	METAMORPHIC	UNKNOWN	UNKNOWN	GNEISS														3.48
00KYT-34		GEOROC	10.1016/j.precamres.2003.12.017	BASEMENT TERRANE CORRELATIONS AND CRUSTAL RECYCLING IN THE WESTERN SUPERIOR PROVINCE: ND ISOTOPIC CHARACTER OF GRANITOID AND FELSIC VOLCANIC ROCKS IN THE WABIGOON SUBPROVINCE, N. ONTARIO, CANADA	PREC. RESEARCH	TOMLINSON, K. Y.; STOTT, G. M.; PERCIVAL, J. A.; STONE, D.		49.9	-89.3	0.01	2500	3175	3850	TIMS_ID	METAMORPHIC	UNKNOWN	UNKNOWN	GNEISS																							19.78	3
00KYT-34		GEOROC	10.1016/j.precamres.2003.12.017	BASEMENT TERRANE CORRELATIONS AND CRUSTAL RECYCLING IN THE WESTERN SUPERIOR PROVINCE: ND ISOTOPIC CHARACTER OF GRANITOID AND FELSIC VOLCANIC ROCKS IN THE WABIGOON SUBPROVINCE, N. ONTARIO, CANADA	PREC. RESEARCH	TOMLINSON, K. Y.; STOTT, G. M.; PERCIVAL, J. A.; STONE, D.		49.9	-89.3	0.01	2500	3175	3850	TIMS	METAMORPHIC	UNKNOWN	UNKNOWN	GNEISS
228-31		GEOROC	10.1016/j.gr.2009.09.001	ROLE OF THE OLLO DE SAPO MASSIVE FELSIC VOLCANISM OF NW IBERIA IN THE EARLY ORDOVICIAN DYNAMICS OF NORTHERN GONDWANA	GONDWANA RES.	DIEZ MONTES, A.; MARTINEZ CATALAN, J. R.; MULAS, F. B.		42.05	-6.63	0.01	472	480	488	NOT GIVEN	METAMORPHIC	UNKNOWN	UNKNOWN	GNEISS	68.4	0.55	15.82		4.2			1.39	1.5	2.9	3.56	0.19	0.06	1.38					30.17		65.7	8.5	28.4	5.19	1.19	5.33		4.86		2.79
498299		GEOROC	10.1016/j.lithos.2008.11.005	GEOCHEMISTRY AND GEODYNAMIC ORIGIN OF THE MESOARCHEAN UJARASSUIT AND IVISAARTOQ GREENSTONE BELTS, SW GREENLAND	LITHOS	ORDONEZ-CALDERON, J. C.; POLAT, A.; FRYER, B. J.; APPEL, P. W. U.; VAN GOOL, J. A. M.; DILEK, Y.; GAGNON, J. E.		64.7232	-50.0143	0.01	3080	3080	3080	IGN	METAMORPHIC	UNKNOWN	UNKNOWN	GNEISS														1.17
498299		GEOROC	10.1016/j.lithos.2008.11.005	GEOCHEMISTRY AND GEODYNAMIC ORIGIN OF THE MESOARCHEAN UJARASSUIT AND IVISAARTOQ GREENSTONE BELTS, SW GREENLAND	LITHOS	ORDONEZ-CALDERON, J. C.; POLAT, A.; FRYER, B. J.; APPEL, P. W. U.; VAN GOOL, J. A. M.; DILEK, Y.; GAGNON, J. E.		64.7232	-50.0143	0.01	3080	3080	3080	ICPOES	METAMORPHIC	UNKNOWN	UNKNOWN	GNEISS	81.6	0.16	11.09		1.41			0.46	0.69	1.63	2.88	0.02	0.02
498299		GEOROC	10.1016/j.lithos.2008.11.005	GEOCHEMISTRY AND GEODYNAMIC ORIGIN OF THE MESOARCHEAN UJARASSUIT AND IVISAARTOQ GREENSTONE BELTS, SW GREENLAND	LITHOS	ORDONEZ-CALDERON, J. C.; POLAT, A.; FRYER, B. J.; APPEL, P. W. U.; VAN GOOL, J. A. M.; DILEK, Y.; GAGNON, J. E.		64.7232	-50.0143	0.01	3080	3080	3080	ICPMS	METAMORPHIC	UNKNOWN	UNKNOWN	GNEISS																			21.02		137.97	9.04	39.15	11.46	1.79	12.43	2.51	18.37	4.2	13.36	1.93
6		GEOROC	10.1130/0016-7606(1986)97<737:MHCAAV>2.0.CO;2	GEOLOGY AND GEOCHEMISTRY OF NUGGIHALLI SCHIST BELT, DHARWAR CRATON, KARNATAKA, INDIA	MEM. GEOL. SOC. INDIA	JAFRI, S. H.; KHAN, N.; AHMED, S. M.; SAXENA, R.		12.92	76.33	0.01	2500	3175	3850	NOT GIVEN	METAMORPHIC	UNKNOWN	UNKNOWN	GNEISS	70.47	0.59	11.22	1.59		4.53		2.62	2.02	2.77	1.78	0.89	0.15	0.73
493123		GEOROC	10.1016/j.precamres.2010.10.003	FIELD AND GEOCHEMICAL CHARACTERISTICS OF MESOARCHEAN TO NEOARCHEAN VOLCANIC ROCKS IN THE STOROE GREENSTONE BELT, SW GREENLAND: EVIDENCE FOR ACCRETION OF INTRA-OCEANIC VOLCANIC ARCS	PREC. RESEARCH	ORDONEZ-CALDERON, J. C.; POLAT, A.; FRYER, B. J.; GAGNON, J. E.		64.4257	-51.0116	0.01	2800	2930	3060	IGN	METAMORPHIC	UNKNOWN	UNKNOWN	GNEISS														0.27
493123		GEOROC	10.1016/j.precamres.2010.10.003	FIELD AND GEOCHEMICAL CHARACTERISTICS OF MESOARCHEAN TO NEOARCHEAN VOLCANIC ROCKS IN THE STOROE GREENSTONE BELT, SW GREENLAND: EVIDENCE FOR ACCRETION OF INTRA-OCEANIC VOLCANIC ARCS	PREC. RESEARCH	ORDONEZ-CALDERON, J. C.; POLAT, A.; FRYER, B. J.; GAGNON, J. E.		64.4257	-51.0116	0.01	2800	2930	3060	ICPOES	METAMORPHIC	UNKNOWN	UNKNOWN	GNEISS	66.99	0.82	14.89		5.67			1.96	4.49	3.55	1.31	0.19	0.11
493123		GEOROC	10.1016/j.precamres.2010.10.003	FIELD AND GEOCHEMICAL CHARACTERISTICS OF MESOARCHEAN TO NEOARCHEAN VOLCANIC ROCKS IN THE STOROE GREENSTONE BELT, SW GREENLAND: EVIDENCE FOR ACCRETION OF INTRA-OCEANIC VOLCANIC ARCS	PREC. RESEARCH	ORDONEZ-CALDERON, J. C.; POLAT, A.; FRYER, B. J.; GAGNON, J. E.		64.4257	-51.0116	0.01	2800	2930	3060	ICPMS	METAMORPHIC	UNKNOWN	UNKNOWN	GNEISS																			23.87		62.31	7.04	27.41	5.75	1.29	5.02	0.75	4.36	0.86	2.5	0.36
B-79-17G		GEOROC	10.1029/96JB00410	GEOCHRONOLOGIC AND SR-ISOTOPIC STUDIES OF CERTAIN UNITS IN THE BARBERTON GRANITE-GREENSTONE TERRANE, SOUTH AFRICA	SPEC. PUBL. GEOL. SOC. S. AFR.	BARTON, J. M. JR.; ROBB, L. J.; ANHAEUSSER, C. R.; VAN NIEROP, D. A.		-26.1	31	0.01	2500	3175	3850	NOT GIVEN	METAMORPHIC	UNKNOWN	UNKNOWN	GNEISS
B-78-15G		GEOROC	10.1016/j.lithos.2016.04.032	GEOCHRONOLOGIC AND SR-ISOTOPIC STUDIES OF CERTAIN UNITS IN THE BARBERTON GRANITE-GREENSTONE TERRANE, SOUTH AFRICA	SPEC. PUBL. GEOL. SOC. S. AFR.	BARTON, J. M. JR.; ROBB, L. J.; ANHAEUSSER, C. R.; VAN NIEROP, D. A.		-26.15	30.5	0.01	2500	3175	3850	NOT GIVEN	METAMORPHIC	UNKNOWN	UNKNOWN	GNEISS
MAZ-22		GEOROC	10.1016/S0024-4937(99)00003-1	SR AND O ISOTOPE CONSTRAINTS ON SOURCE AND CRUSTAL CONTAMINATION IN THE HIGH-K CALC-ALKALINE AND SHOSHONITIC NEOGENE VOLCANIC ROCKS OF SE SPAIN	LITHOS	BENITO GARCIA, R.; LOPEZ RUIZ, J.; CEBRIA, J.-M.; HERTOGEN, J.; DOBLAS, M.; OYARZUN, R.; DEMAIFFE, D.		37.6	-1.32	0.01	5	11	17	XRF	METAMORPHIC	UNKNOWN	UNKNOWN	GNEISS	47.49	1.42	29.49		9.77			2.91	2.34	1.61	3.06	0.1	0.28
MAZ-22		GEOROC	10.1016/S0024-4937(99)00003-1	SR AND O ISOTOPE CONSTRAINTS ON SOURCE AND CRUSTAL CONTAMINATION IN THE HIGH-K CALC-ALKALINE AND SHOSHONITIC NEOGENE VOLCANIC ROCKS OF SE SPAIN	LITHOS	BENITO GARCIA, R.; LOPEZ RUIZ, J.; CEBRIA, J.-M.; HERTOGEN, J.; DOBLAS, M.; OYARZUN, R.; DEMAIFFE, D.		37.6	-1.32	0.01	5	11	17	MS	METAMORPHIC	UNKNOWN	UNKNOWN	GNEISS
MAZ-22		GEOROC	10.1016/S0024-4937(99)00003-1	SR AND O ISOTOPE CONSTRAINTS ON SOURCE AND CRUSTAL CONTAMINATION IN THE HIGH-K CALC-ALKALINE AND SHOSHONITIC NEOGENE VOLCANIC ROCKS OF SE SPAIN	LITHOS	BENITO GARCIA, R.; LOPEZ RUIZ, J.; CEBRIA, J.-M.; HERTOGEN, J.; DOBLAS, M.; OYARZUN, R.; DEMAIFFE, D.		37.6	-1.32	0.01	5	11	17	INAA	METAMORPHIC	UNKNOWN	UNKNOWN	GNEISS																			89.2		180		77	14.5	3.01		1.48
MAZ-22		GEOROC	10.1016/S0024-4937(99)00003-1	SR AND O ISOTOPE CONSTRAINTS ON SOURCE AND CRUSTAL CONTAMINATION IN THE HIGH-K CALC-ALKALINE AND SHOSHONITIC NEOGENE VOLCANIC ROCKS OF SE SPAIN	LITHOS	BENITO GARCIA, R.; LOPEZ RUIZ, J.; CEBRIA, J.-M.; HERTOGEN, J.; DOBLAS, M.; OYARZUN, R.; DEMAIFFE, D.		37.6	-1.32	0.01	5	11	17	IGN	METAMORPHIC	UNKNOWN	UNKNOWN	GNEISS														1.08
11JD11-6		GEOROC	10.1016/j.gr.2012.12.025	GEOCHEMISTRY, ZIRCON U-PB GEOCHRONOLOGY AND LU-HF ISOTOPES OF METAVOLCANICS FROM EASTERN HEBEI REVEAL NEOARCHEAN SUBDUCTION TECTONICS IN THE NORTH CHINA CRATON	GONDWANA RES.	GUO, RONGRONG; LIU, SHUWEN; SANTOSH, M.; LI, QIUGEN; BAI, XIANG; WANG, WEI		40.3264	118.213	0.01	2500	3175	3850	XRF	METAMORPHIC	UNKNOWN	UNKNOWN	GNEISS	52.2	0.64	16.17		8.37		7.53	4.9	5.25	3.56	2.29	0.39	0.12
11JD11-6		GEOROC	10.1016/j.gr.2012.12.025	GEOCHEMISTRY, ZIRCON U-PB GEOCHRONOLOGY AND LU-HF ISOTOPES OF METAVOLCANICS FROM EASTERN HEBEI REVEAL NEOARCHEAN SUBDUCTION TECTONICS IN THE NORTH CHINA CRATON	GONDWANA RES.	GUO, RONGRONG; LIU, SHUWEN; SANTOSH, M.; LI, QIUGEN; BAI, XIANG; WANG, WEI		40.3264	118.213	0.01	2500	3175	3850	MC_ICPMS	METAMORPHIC	UNKNOWN	UNKNOWN	GNEISS																			29		58	6.37	25	4	1.39	3.61	0.43	2.19	0.42	1.19	0.18
11JD11-6		GEOROC	10.1016/j.gr.2012.12.025	GEOCHEMISTRY, ZIRCON U-PB GEOCHRONOLOGY AND LU-HF ISOTOPES OF METAVOLCANICS FROM EASTERN HEBEI REVEAL NEOARCHEAN SUBDUCTION TECTONICS IN THE NORTH CHINA CRATON	GONDWANA RES.	GUO, RONGRONG; LIU, SHUWEN; SANTOSH, M.; LI, QIUGEN; BAI, XIANG; WANG, WEI		40.3264	118.213	0.01	2500	3175	3850	IGN	METAMORPHIC	UNKNOWN	UNKNOWN	GNEISS														6.02
MLG-13		GEOROC	10.1086/314337	U-PB GEOCHRONOLOGY AND ISOTOPE GEOCHEMISTRY OF THE ARCHEAN AND PROTEROZOIC ROCKS OF NORTH-CENTRAL MADAGASCAR	J. GEOL.	TUCKER, R. D.; ASHWAL, L. D.; HANDKE, M. J.; LE GRANGE, M.; HAMILTON, M. A.; RAMBELOSON, R. A.		-17	47	0.01	542	1521	2500	TIMS_ID	METAMORPHIC	UNKNOWN	UNKNOWN	GNEISS																							9.145	2.066
MLG-13		GEOROC	10.1086/314337	U-PB GEOCHRONOLOGY AND ISOTOPE GEOCHEMISTRY OF THE ARCHEAN AND PROTEROZOIC ROCKS OF NORTH-CENTRAL MADAGASCAR	J. GEOL.	TUCKER, R. D.; ASHWAL, L. D.; HANDKE, M. J.; LE GRANGE, M.; HAMILTON, M. A.; RAMBELOSON, R. A.		-17	47	0.01	542	1521	2500	TIMS	METAMORPHIC	UNKNOWN	UNKNOWN	GNEISS
477615		GEOROC	10.1016/j.chemgeo.2013.07.001	MESOARCHAEAN ALUMINOUS ROCKS AT STORO, SOUTHERN WEST GREENLAND: NEW AGE DATA AND EVIDENCE OF PREMETAMORPHIC SEAFLOOR WEATHERING OF BASALTS	CHEM. GEOL.	SZILAS, K.; GARDE, A. A.		64.4037	-51.0938	0.01				XRF	METAMORPHIC	UNKNOWN	UNKNOWN	GNEISS	49.471	2.727	22.974	3.573		10.93		2.428	3.227	1.76	0.55	0.203	0.22
477615		GEOROC	10.1016/j.chemgeo.2013.07.001	MESOARCHAEAN ALUMINOUS ROCKS AT STORO, SOUTHERN WEST GREENLAND: NEW AGE DATA AND EVIDENCE OF PREMETAMORPHIC SEAFLOOR WEATHERING OF BASALTS	CHEM. GEOL.	SZILAS, K.; GARDE, A. A.		64.4037	-51.0938	0.01				IGN	METAMORPHIC	UNKNOWN	UNKNOWN	GNEISS														0.987
477615		GEOROC	10.1016/j.chemgeo.2013.07.001	MESOARCHAEAN ALUMINOUS ROCKS AT STORO, SOUTHERN WEST GREENLAND: NEW AGE DATA AND EVIDENCE OF PREMETAMORPHIC SEAFLOOR WEATHERING OF BASALTS	CHEM. GEOL.	SZILAS, K.; GARDE, A. A.		64.4037	-51.0938	0.01				ICPMS	METAMORPHIC	UNKNOWN	UNKNOWN	GNEISS																			20.1913		46.4117	6.18672	26.4028	6.91272	1.59378	7.41219	1.27841	8.03237	1.86949	4.99177	0.771749
BA38		GEOROC	10.1016/0301-9268(95)00072-0	THE OLDEST PART OF THE BARBERTON GRANITOID-GREENSTONE TERRAIN, SOUTH AFRICA: EVIDENCE FOR CRUST FORMATION BETWEEN 3.5 AND 3.7 GA	PREC. RESEARCH	KRÖNER, A.; HEGNER, E.; WENDT, J. I.; BYERLY, G. R.		-26.13	30.98	0.01	2500	3175	3850	TIMS_ID	METAMORPHIC	UNKNOWN	UNKNOWN	GNEISS																							20.35	3.06
BA38		GEOROC	10.1016/0301-9268(95)00072-0	THE OLDEST PART OF THE BARBERTON GRANITOID-GREENSTONE TERRAIN, SOUTH AFRICA: EVIDENCE FOR CRUST FORMATION BETWEEN 3.5 AND 3.7 GA	PREC. RESEARCH	KRÖNER, A.; HEGNER, E.; WENDT, J. I.; BYERLY, G. R.		-26.13	30.98	0.01	2500	3175	3850	TIMS	METAMORPHIC	UNKNOWN	UNKNOWN	GNEISS
339551		GEOROC	10.1016/j.lithos.2014.04.020	ACCRETION AND EVOLUTION OF AN ARCHEAN HIGH-GRADE GREY GNEISS-AMPHIBOLITE COMPLEX: THE FISKEFJORD AREA, SOUTHERN WEST GREENLAND	BULL. GEOL. GREENLAND SURV.	GARDE, A. A.		64.7332	-51.973	0.01	2500	3175	3850	XRF	METAMORPHIC	UNKNOWN	UNKNOWN	GNEISS	63.99	0.48	17.07				4.06	2.56	5.35		0.31	0.18	0.08						13		17		8
339551		GEOROC	10.1016/j.lithos.2014.04.020	ACCRETION AND EVOLUTION OF AN ARCHEAN HIGH-GRADE GREY GNEISS-AMPHIBOLITE COMPLEX: THE FISKEFJORD AREA, SOUTHERN WEST GREENLAND	BULL. GEOL. GREENLAND SURV.	GARDE, A. A.		64.7332	-51.973	0.01	2500	3175	3850	TIT	METAMORPHIC	UNKNOWN	UNKNOWN	GNEISS				1.21		2.97
339551		GEOROC	10.1016/j.lithos.2014.04.020	ACCRETION AND EVOLUTION OF AN ARCHEAN HIGH-GRADE GREY GNEISS-AMPHIBOLITE COMPLEX: THE FISKEFJORD AREA, SOUTHERN WEST GREENLAND	BULL. GEOL. GREENLAND SURV.	GARDE, A. A.		64.7332	-51.973	0.01	2500	3175	3850	INAA	METAMORPHIC	UNKNOWN	UNKNOWN	GNEISS																			8.8		15		6	1.24	0.68		0.2
339551		GEOROC	10.1016/j.lithos.2014.04.020	ACCRETION AND EVOLUTION OF AN ARCHEAN HIGH-GRADE GREY GNEISS-AMPHIBOLITE COMPLEX: THE FISKEFJORD AREA, SOUTHERN WEST GREENLAND	BULL. GEOL. GREENLAND SURV.	GARDE, A. A.		64.7332	-51.973	0.01	2500	3175	3850	IGN	METAMORPHIC	UNKNOWN	UNKNOWN	GNEISS														0.52
339551		GEOROC	10.1016/j.lithos.2014.04.020	ACCRETION AND EVOLUTION OF AN ARCHEAN HIGH-GRADE GREY GNEISS-AMPHIBOLITE COMPLEX: THE FISKEFJORD AREA, SOUTHERN WEST GREENLAND	BULL. GEOL. GREENLAND SURV.	GARDE, A. A.		64.7332	-51.973	0.01	2500	3175	3850	AAS	METAMORPHIC	UNKNOWN	UNKNOWN	GNEISS										4.45
CL87-52F		GEOROC	10.1007/BF00310736	SELECTIVELY CONTAMINATED MAGMAS OF THE TERTIARY EAST GREENLAND MACRODIKE COMPLEX	CONTRIB. MINERAL. PETROL.	BLICHERT-TOFT, J.; LESHER, C. E.; ROSING, M. T.		68.25	-29.67	0.01	0	32.75	65.5	TIMS_ID	METAMORPHIC	UNKNOWN	UNKNOWN	GNEISS																							29.32	4.442
CL87-52F		GEOROC	10.1007/BF00310736	SELECTIVELY CONTAMINATED MAGMAS OF THE TERTIARY EAST GREENLAND MACRODIKE COMPLEX	CONTRIB. MINERAL. PETROL.	BLICHERT-TOFT, J.; LESHER, C. E.; ROSING, M. T.		68.25	-29.67	0.01	0	32.75	65.5	TIMS	METAMORPHIC	UNKNOWN	UNKNOWN	GNEISS
CL87-52F		GEOROC	10.1007/BF00310736	SELECTIVELY CONTAMINATED MAGMAS OF THE TERTIARY EAST GREENLAND MACRODIKE COMPLEX	CONTRIB. MINERAL. PETROL.	BLICHERT-TOFT, J.; LESHER, C. E.; ROSING, M. T.		68.25	-29.67	0.01	0	32.75	65.5	MS	METAMORPHIC	UNKNOWN	UNKNOWN	GNEISS
CL87-52F		GEOROC	10.1007/BF00310736	SELECTIVELY CONTAMINATED MAGMAS OF THE TERTIARY EAST GREENLAND MACRODIKE COMPLEX	CONTRIB. MINERAL. PETROL.	BLICHERT-TOFT, J.; LESHER, C. E.; ROSING, M. T.		68.25	-29.67	0.01	0	32.75	65.5	ICPAES	METAMORPHIC	UNKNOWN	UNKNOWN	GNEISS																			34.67		67.47	7.6	26.54	3.53	0.71	2.93		2.02	0.4	1.06
CL87-52F		GEOROC	10.1007/BF00310736	SELECTIVELY CONTAMINATED MAGMAS OF THE TERTIARY EAST GREENLAND MACRODIKE COMPLEX	CONTRIB. MINERAL. PETROL.	BLICHERT-TOFT, J.; LESHER, C. E.; ROSING, M. T.		68.25	-29.67	0.01	0	32.75	65.5	DCPAES	METAMORPHIC	UNKNOWN	UNKNOWN	GNEISS	72.15	0.21	14.2		2.39			0.47	2.11	4.31	3.12	0.09	0.03
KB151		GEOROC	10.1016/S1342-937X(05)70998-9	LATE MESOPROTEROZOIC ARC AND BACK-ARC VOLCANISM IN THE HEIMEFRONTFJELLA (EAST ANTARCTICA) AND IMPLICATIONS FOR THE PALAEOGEOGRAPHY AT THE SOUTHEASTERN MARGIN OF THE KAAPVAAL-GRUNEHOGNA CRATON	GONDWANA RES.	BAUER, W.; JACOBS, J.; FANNING, C. M.; SCHMIDT, R.		-74.5	-10	0.01				XRF	METAMORPHIC	UNKNOWN	UNKNOWN	GNEISS	52.57	1.33	17.23		8.88			4.56	7.64	4.29	1.86	0.24	0.13
KB151		GEOROC	10.1016/S1342-937X(05)70998-9	LATE MESOPROTEROZOIC ARC AND BACK-ARC VOLCANISM IN THE HEIMEFRONTFJELLA (EAST ANTARCTICA) AND IMPLICATIONS FOR THE PALAEOGEOGRAPHY AT THE SOUTHEASTERN MARGIN OF THE KAAPVAAL-GRUNEHOGNA CRATON	GONDWANA RES.	BAUER, W.; JACOBS, J.; FANNING, C. M.; SCHMIDT, R.		-74.5	-10	0.01				IGN	METAMORPHIC	UNKNOWN	UNKNOWN	GNEISS														0.96
KB151		GEOROC	10.1016/S1342-937X(05)70998-9	LATE MESOPROTEROZOIC ARC AND BACK-ARC VOLCANISM IN THE HEIMEFRONTFJELLA (EAST ANTARCTICA) AND IMPLICATIONS FOR THE PALAEOGEOGRAPHY AT THE SOUTHEASTERN MARGIN OF THE KAAPVAAL-GRUNEHOGNA CRATON	GONDWANA RES.	BAUER, W.; JACOBS, J.; FANNING, C. M.; SCHMIDT, R.		-74.5	-10	0.01				ICPMS	METAMORPHIC	UNKNOWN	UNKNOWN	GNEISS																			18.6		39	4.56	20	4.64	1.69	4.44	0.77	4.85	0.92	2.71	0.413
OES-99-53		GEOROC	10.1016/S0301-9268(02)00026-8	U-PB GEOCHRONOLOGY AND GEOCHEMISTRY OF EARLY PROTEROZOIC ROCKS OF THE TECTONIC BASEMENT WINDOWS IN CENTRAL NORDLAND, CALEDONIDES OF NORTH-CENTRAL NORWAY	PREC. RESEARCH	SKAR, O.		66.5	12.5	0.01				XRF	METAMORPHIC	UNKNOWN	UNKNOWN	GNEISS	77.02	0.27	10.75		3.05			0	0.34	2.15	5	0	0.04						61		147		40
OES-99-53		GEOROC	10.1016/S0301-9268(02)00026-8	U-PB GEOCHRONOLOGY AND GEOCHEMISTRY OF EARLY PROTEROZOIC ROCKS OF THE TECTONIC BASEMENT WINDOWS IN CENTRAL NORDLAND, CALEDONIDES OF NORTH-CENTRAL NORWAY	PREC. RESEARCH	SKAR, O.		66.5	12.5	0.01				IGN	METAMORPHIC	UNKNOWN	UNKNOWN	GNEISS														0.12
LAMCAN7		GEOROC	10.1029/JB088iB04p03379	ORIGIN OF MESOZOIC AND TERTIARY GRANITE IN THE WESTERN UNITED STATES AND IMPLICATIONS FOR PRE-MESOZOIC CRUSTAL STRUCTURE. 1. ND AND SR ISOTOPIC STUDIES IN THE GEOCLINE OF THE NORTHERN GREAT BASIN	J. GEOPHYS. RES.	FARMER, G. L.; PERRY, F. V.; SEMKEN, S.; CROWE, B. M.; CURTIS, D. M.; DEPAOLO, D. J.		40.3	-115.6	0.01	542	1521	2500	TIMS_ID	METAMORPHIC	UNKNOWN	UNKNOWN	GNEISS																							12.4	3.51
LAMCAN7		GEOROC	10.1029/JB088iB04p03379	ORIGIN OF MESOZOIC AND TERTIARY GRANITE IN THE WESTERN UNITED STATES AND IMPLICATIONS FOR PRE-MESOZOIC CRUSTAL STRUCTURE. 1. ND AND SR ISOTOPIC STUDIES IN THE GEOCLINE OF THE NORTHERN GREAT BASIN	J. GEOPHYS. RES.	FARMER, G. L.; PERRY, F. V.; SEMKEN, S.; CROWE, B. M.; CURTIS, D. M.; DEPAOLO, D. J.		40.3	-115.6	0.01	542	1521	2500	TIMS	METAMORPHIC	UNKNOWN	UNKNOWN	GNEISS
B-78-12A		GEOROC	10.1007/s00410-007-0195-7	GEOCHRONOLOGIC AND SR-ISOTOPIC STUDIES OF CERTAIN UNITS IN THE BARBERTON GRANITE-GREENSTONE TERRANE, SOUTH AFRICA	SPEC. PUBL. GEOL. SOC. S. AFR.	BARTON, J. M. JR.; ROBB, L. J.; ANHAEUSSER, C. R.; VAN NIEROP, D. A.		-26.1	31	0.01	2500	3175	3850	NOT GIVEN	METAMORPHIC	UNKNOWN	UNKNOWN	GNEISS
MW37		GEOROC	10.1093/petrology/22.2.155	ISOTOPE GEOCHEMISTRY OF TERTIARY IGNEOUS ROCKS FROM THE ISLE OF SKYE, N.W. SCOTLAND	J. PETROL.	DICKIN, A. P.		58.4167	-4.9833	0.01				XRF	METAMORPHIC	UNKNOWN	UNKNOWN	GNEISS
MW37		GEOROC	10.1093/petrology/22.2.155	ISOTOPE GEOCHEMISTRY OF TERTIARY IGNEOUS ROCKS FROM THE ISLE OF SKYE, N.W. SCOTLAND	J. PETROL.	DICKIN, A. P.		58.4167	-4.9833	0.01				TIMS	METAMORPHIC	UNKNOWN	UNKNOWN	GNEISS
306-13		GEOROC	10.1016/j.gr.2009.09.001	ROLE OF THE OLLO DE SAPO MASSIVE FELSIC VOLCANISM OF NW IBERIA IN THE EARLY ORDOVICIAN DYNAMICS OF NORTHERN GONDWANA	GONDWANA RES.	DIEZ MONTES, A.; MARTINEZ CATALAN, J. R.; MULAS, F. B.		42.05	-6.63	0.01	472	480	488	NOT GIVEN	METAMORPHIC	UNKNOWN	UNKNOWN	GNEISS	68.12	0.44	15.73		3.55			1.25	1.01	3.24	4	0.19	0.03	2.11					19.43		40.86	5.4	22.07	3.27	0.86	3.28		3.04		1.69
PC-230		GEOROC	10.1093/petrology/egr014	IMPLICATIONS OF THE NUVVUAGITTUQ GREENSTONE BELT FOR THE FORMATION OF EARTHS EARLY CRUST	J. PETROL.	O^NEIL, J.; FRANCIS, D. M.; CARLSON, R. W.		58	-77	0.01				XRF	METAMORPHIC	UNKNOWN	UNKNOWN	GNEISS	56.54	0.407	18.76				9.25005	4.39	5.08	1.76	1.23	0.043	0.387
PC-230		GEOROC	10.1093/petrology/egr014	IMPLICATIONS OF THE NUVVUAGITTUQ GREENSTONE BELT FOR THE FORMATION OF EARTHS EARLY CRUST	J. PETROL.	O^NEIL, J.; FRANCIS, D. M.; CARLSON, R. W.		58	-77	0.01				IGN	METAMORPHIC	UNKNOWN	UNKNOWN	GNEISS														2.18
PC-230		GEOROC	10.1093/petrology/egr014	IMPLICATIONS OF THE NUVVUAGITTUQ GREENSTONE BELT FOR THE FORMATION OF EARTHS EARLY CRUST	J. PETROL.	O^NEIL, J.; FRANCIS, D. M.; CARLSON, R. W.		58	-77	0.01				ICPMS	METAMORPHIC	UNKNOWN	UNKNOWN	GNEISS																			2.4		4.8	0.59	2.63	0.71	0.392	1.25	0.34	2.5	0.55	1.73	0.275
PC-230		GEOROC	10.1126/SCIENCE.1161925	NEODYMIUM-142 EVIDENCE FOR HADEAN MAFIC CRUST	SCIENCE	O^NEIL, J.; CARLSON, R. W.; FRANCIS, D. M.; STEVENSON, R. K.		58	-77	0.01				TIMS_ID	METAMORPHIC	UNKNOWN	UNKNOWN	GNEISS																							2.44	0.72
PC-230		GEOROC	10.1126/SCIENCE.1161925	NEODYMIUM-142 EVIDENCE FOR HADEAN MAFIC CRUST	SCIENCE	O^NEIL, J.; CARLSON, R. W.; FRANCIS, D. M.; STEVENSON, R. K.		58	-77	0.01				TIMS	METAMORPHIC	UNKNOWN	UNKNOWN	GNEISS
PC-230		GEOROC	10.1126/SCIENCE.1161925	NEODYMIUM-142 EVIDENCE FOR HADEAN MAFIC CRUST	SCIENCE	O^NEIL, J.; CARLSON, R. W.; FRANCIS, D. M.; STEVENSON, R. K.		58	-77	0.01				NOT GIVEN	METAMORPHIC	UNKNOWN	UNKNOWN	GNEISS
165611		GEOROC	10.1029/JB094iB06p07749	PB, SR AND ND ISOTOPIC CHARACTERISTICS OF TERTIARY RED SEA RIFT VOLCANICS FROM THE CENTRAL SAUDI ARABIAN COASTAL PLAIN	J. GEOPHYS. RES.	HEGNER, E.; PALLISTER, J. S.		20.15	40.27	0.01	800	800	800	TIMS	METAMORPHIC	UNKNOWN	UNKNOWN	GNEISS
165611		GEOROC	10.1029/JB094iB06p07749	PB, SR AND ND ISOTOPIC CHARACTERISTICS OF TERTIARY RED SEA RIFT VOLCANICS FROM THE CENTRAL SAUDI ARABIAN COASTAL PLAIN	J. GEOPHYS. RES.	HEGNER, E.; PALLISTER, J. S.		20.15	40.27	0.01	800	800	800	NOT GIVEN	METAMORPHIC	UNKNOWN	UNKNOWN	GNEISS																							26.4	3.6
YX011-2		GEOROC	10.1016/j.gr.2011.02.012	GEOCHEMISTRY AND ZIRCON U-PB-HF ISOTOPIC SYSTEMATICS OF THE NEOARCHEAN YIXIAN-FUXIN GREENSTONE BELT, NORTHERN MARGIN OF THE NORTH CHINA CRATON: IMPLICATIONS FOR PETROGENESIS AND TECTONIC SETTING	GONDWANA RES.	WANG, WEI; LIU, SHUWEN; BAI, XIANG; YANG, PENGTAO; LI, QIUGEN; ZHANG, LIFEI		41.7311	121.254	0.01				XRF	METAMORPHIC	UNKNOWN	UNKNOWN	GNEISS	63.39	0.41	17.44		4.67			1.81	4.38	3.97	2.19	0.19	0.06
YX011-2		GEOROC	10.1016/j.gr.2011.02.012	GEOCHEMISTRY AND ZIRCON U-PB-HF ISOTOPIC SYSTEMATICS OF THE NEOARCHEAN YIXIAN-FUXIN GREENSTONE BELT, NORTHERN MARGIN OF THE NORTH CHINA CRATON: IMPLICATIONS FOR PETROGENESIS AND TECTONIC SETTING	GONDWANA RES.	WANG, WEI; LIU, SHUWEN; BAI, XIANG; YANG, PENGTAO; LI, QIUGEN; ZHANG, LIFEI		41.7311	121.254	0.01				IGN	METAMORPHIC	UNKNOWN	UNKNOWN	GNEISS														1.33
YX011-2		GEOROC	10.1016/j.gr.2011.02.012	GEOCHEMISTRY AND ZIRCON U-PB-HF ISOTOPIC SYSTEMATICS OF THE NEOARCHEAN YIXIAN-FUXIN GREENSTONE BELT, NORTHERN MARGIN OF THE NORTH CHINA CRATON: IMPLICATIONS FOR PETROGENESIS AND TECTONIC SETTING	GONDWANA RES.	WANG, WEI; LIU, SHUWEN; BAI, XIANG; YANG, PENGTAO; LI, QIUGEN; ZHANG, LIFEI		41.7311	121.254	0.01				ICPMS	METAMORPHIC	UNKNOWN	UNKNOWN	GNEISS																			20.2		39	4.2	15.6	2.49	0.78	1.99	0.26	1.32	0.22	0.66	0.1
B-79-14C		GEOROC	10.1134/S0869591111020068	GEOCHRONOLOGIC AND SR-ISOTOPIC STUDIES OF CERTAIN UNITS IN THE BARBERTON GRANITE-GREENSTONE TERRANE, SOUTH AFRICA	SPEC. PUBL. GEOL. SOC. S. AFR.	BARTON, J. M. JR.; ROBB, L. J.; ANHAEUSSER, C. R.; VAN NIEROP, D. A.		-26.1	31	0.01	2500	3175	3850	NOT GIVEN	METAMORPHIC	UNKNOWN	UNKNOWN	GNEISS
540414		GEOROC	10.1180/minmag.2015.079.4.04	PETROLOGICAL AND GEOCHEMICAL CHARACTERISTICS OF MESOPROTEROZOIC DYKE SWARMS IN THE GARDAR PROVINCE, SOUTH GREENLAND: EVIDENCE FOR A MAJOR SUB-CONTINENTAL LITHOSPHERIC MANTLE COMPONENT IN THE GENERATION OF THE MAGMAS	MINERAL. MAG.	BARTELS, A.; NIELSEN, T. F. D.; LEE, SEUNG RYEOL; UPTON, B. G. J.		61	-48	0.01	2500	3175	3850	TIMS_ID	METAMORPHIC	UNKNOWN	UNKNOWN	GNEISS																							35.7	5.38
540414		GEOROC	10.1180/minmag.2015.079.4.04	PETROLOGICAL AND GEOCHEMICAL CHARACTERISTICS OF MESOPROTEROZOIC DYKE SWARMS IN THE GARDAR PROVINCE, SOUTH GREENLAND: EVIDENCE FOR A MAJOR SUB-CONTINENTAL LITHOSPHERIC MANTLE COMPONENT IN THE GENERATION OF THE MAGMAS	MINERAL. MAG.	BARTELS, A.; NIELSEN, T. F. D.; LEE, SEUNG RYEOL; UPTON, B. G. J.		61	-48	0.01	2500	3175	3850	TIMS	METAMORPHIC	UNKNOWN	UNKNOWN	GNEISS
540414		GEOROC	10.1180/minmag.2015.079.4.04	PETROLOGICAL AND GEOCHEMICAL CHARACTERISTICS OF MESOPROTEROZOIC DYKE SWARMS IN THE GARDAR PROVINCE, SOUTH GREENLAND: EVIDENCE FOR A MAJOR SUB-CONTINENTAL LITHOSPHERIC MANTLE COMPONENT IN THE GENERATION OF THE MAGMAS	MINERAL. MAG.	BARTELS, A.; NIELSEN, T. F. D.; LEE, SEUNG RYEOL; UPTON, B. G. J.		61	-48	0.01	2500	3175	3850	IGN	METAMORPHIC	UNKNOWN	UNKNOWN	GNEISS														0.78
540414		GEOROC	10.1180/minmag.2015.079.4.04	PETROLOGICAL AND GEOCHEMICAL CHARACTERISTICS OF MESOPROTEROZOIC DYKE SWARMS IN THE GARDAR PROVINCE, SOUTH GREENLAND: EVIDENCE FOR A MAJOR SUB-CONTINENTAL LITHOSPHERIC MANTLE COMPONENT IN THE GENERATION OF THE MAGMAS	MINERAL. MAG.	BARTELS, A.; NIELSEN, T. F. D.; LEE, SEUNG RYEOL; UPTON, B. G. J.		61	-48	0.01	2500	3175	3850	ICPMS	METAMORPHIC	UNKNOWN	UNKNOWN	GNEISS	71.36	0.197	15.1		1.48			0.41	2.09	4.44	2.22	0.06	0.022						48.5		88.1	9.56	31.5	5.16	0.767	3.21	0.4	1.62	0.22	0.46	0.054
OES-99-18		GEOROC	10.1016/S0301-9268(02)00026-8	U-PB GEOCHRONOLOGY AND GEOCHEMISTRY OF EARLY PROTEROZOIC ROCKS OF THE TECTONIC BASEMENT WINDOWS IN CENTRAL NORDLAND, CALEDONIDES OF NORTH-CENTRAL NORWAY	PREC. RESEARCH	SKAR, O.		66.5	12.5	0.01				XRF	METAMORPHIC	UNKNOWN	UNKNOWN	GNEISS	71.25	0.29	15.13		2.26			0.48	1.26	3.35	5.37	0.05	0.06						56		117		56
OES-99-18		GEOROC	10.1016/S0301-9268(02)00026-8	U-PB GEOCHRONOLOGY AND GEOCHEMISTRY OF EARLY PROTEROZOIC ROCKS OF THE TECTONIC BASEMENT WINDOWS IN CENTRAL NORDLAND, CALEDONIDES OF NORTH-CENTRAL NORWAY	PREC. RESEARCH	SKAR, O.		66.5	12.5	0.01				TIMS_ID	METAMORPHIC	UNKNOWN	UNKNOWN	GNEISS																							39.48	6.19
OES-99-18		GEOROC	10.1016/S0301-9268(02)00026-8	U-PB GEOCHRONOLOGY AND GEOCHEMISTRY OF EARLY PROTEROZOIC ROCKS OF THE TECTONIC BASEMENT WINDOWS IN CENTRAL NORDLAND, CALEDONIDES OF NORTH-CENTRAL NORWAY	PREC. RESEARCH	SKAR, O.		66.5	12.5	0.01				TIMS	METAMORPHIC	UNKNOWN	UNKNOWN	GNEISS
OES-99-18		GEOROC	10.1016/S0301-9268(02)00026-8	U-PB GEOCHRONOLOGY AND GEOCHEMISTRY OF EARLY PROTEROZOIC ROCKS OF THE TECTONIC BASEMENT WINDOWS IN CENTRAL NORDLAND, CALEDONIDES OF NORTH-CENTRAL NORWAY	PREC. RESEARCH	SKAR, O.		66.5	12.5	0.01				IGN	METAMORPHIC	UNKNOWN	UNKNOWN	GNEISS														0.37
MAZ-14		GEOROC	10.1016/S0024-4937(99)00003-1	SR AND O ISOTOPE CONSTRAINTS ON SOURCE AND CRUSTAL CONTAMINATION IN THE HIGH-K CALC-ALKALINE AND SHOSHONITIC NEOGENE VOLCANIC ROCKS OF SE SPAIN	LITHOS	BENITO GARCIA, R.; LOPEZ RUIZ, J.; CEBRIA, J.-M.; HERTOGEN, J.; DOBLAS, M.; OYARZUN, R.; DEMAIFFE, D.		37.6	-1.32	0.01	5	11	17	XRF	METAMORPHIC	UNKNOWN	UNKNOWN	GNEISS	50.33	1.4	26.63		8.38			1.73	1.73	3.38	3.69	0.24	0.13
MAZ-14		GEOROC	10.1016/S0024-4937(99)00003-1	SR AND O ISOTOPE CONSTRAINTS ON SOURCE AND CRUSTAL CONTAMINATION IN THE HIGH-K CALC-ALKALINE AND SHOSHONITIC NEOGENE VOLCANIC ROCKS OF SE SPAIN	LITHOS	BENITO GARCIA, R.; LOPEZ RUIZ, J.; CEBRIA, J.-M.; HERTOGEN, J.; DOBLAS, M.; OYARZUN, R.; DEMAIFFE, D.		37.6	-1.32	0.01	5	11	17	MS	METAMORPHIC	UNKNOWN	UNKNOWN	GNEISS
MAZ-14		GEOROC	10.1016/S0024-4937(99)00003-1	SR AND O ISOTOPE CONSTRAINTS ON SOURCE AND CRUSTAL CONTAMINATION IN THE HIGH-K CALC-ALKALINE AND SHOSHONITIC NEOGENE VOLCANIC ROCKS OF SE SPAIN	LITHOS	BENITO GARCIA, R.; LOPEZ RUIZ, J.; CEBRIA, J.-M.; HERTOGEN, J.; DOBLAS, M.; OYARZUN, R.; DEMAIFFE, D.		37.6	-1.32	0.01	5	11	17	INAA	METAMORPHIC	UNKNOWN	UNKNOWN	GNEISS																			51.9		109		46.1	9.2	2.81		1.28
MAZ-14		GEOROC	10.1016/S0024-4937(99)00003-1	SR AND O ISOTOPE CONSTRAINTS ON SOURCE AND CRUSTAL CONTAMINATION IN THE HIGH-K CALC-ALKALINE AND SHOSHONITIC NEOGENE VOLCANIC ROCKS OF SE SPAIN	LITHOS	BENITO GARCIA, R.; LOPEZ RUIZ, J.; CEBRIA, J.-M.; HERTOGEN, J.; DOBLAS, M.; OYARZUN, R.; DEMAIFFE, D.		37.6	-1.32	0.01	5	11	17	IGN	METAMORPHIC	UNKNOWN	UNKNOWN	GNEISS														2.3
289278		GEOROC	10.1139/e03-003	ACCRETION AND EVOLUTION OF AN ARCHEAN HIGH-GRADE GREY GNEISS-AMPHIBOLITE COMPLEX: THE FISKEFJORD AREA, SOUTHERN WEST GREENLAND	BULL. GEOL. GREENLAND SURV.	GARDE, A. A.		64.6611	-51.1894	0.01	2500	3175	3850	XRF	METAMORPHIC	UNKNOWN	UNKNOWN	GNEISS	69.41	0.13	17.24				1.29	0.44	3.27		1.84	0.04	0.03						3		4		3
289278		GEOROC	10.1139/e03-003	ACCRETION AND EVOLUTION OF AN ARCHEAN HIGH-GRADE GREY GNEISS-AMPHIBOLITE COMPLEX: THE FISKEFJORD AREA, SOUTHERN WEST GREENLAND	BULL. GEOL. GREENLAND SURV.	GARDE, A. A.		64.6611	-51.1894	0.01	2500	3175	3850	TIT	METAMORPHIC	UNKNOWN	UNKNOWN	GNEISS				0.36		0.97
289278		GEOROC	10.1139/e03-003	ACCRETION AND EVOLUTION OF AN ARCHEAN HIGH-GRADE GREY GNEISS-AMPHIBOLITE COMPLEX: THE FISKEFJORD AREA, SOUTHERN WEST GREENLAND	BULL. GEOL. GREENLAND SURV.	GARDE, A. A.		64.6611	-51.1894	0.01	2500	3175	3850	INAA	METAMORPHIC	UNKNOWN	UNKNOWN	GNEISS																			4.1		6		3	0.52	0.34		0.1
289278		GEOROC	10.1139/e03-003	ACCRETION AND EVOLUTION OF AN ARCHEAN HIGH-GRADE GREY GNEISS-AMPHIBOLITE COMPLEX: THE FISKEFJORD AREA, SOUTHERN WEST GREENLAND	BULL. GEOL. GREENLAND SURV.	GARDE, A. A.		64.6611	-51.1894	0.01	2500	3175	3850	IGN	METAMORPHIC	UNKNOWN	UNKNOWN	GNEISS														0.11
289278		GEOROC	10.1139/e03-003	ACCRETION AND EVOLUTION OF AN ARCHEAN HIGH-GRADE GREY GNEISS-AMPHIBOLITE COMPLEX: THE FISKEFJORD AREA, SOUTHERN WEST GREENLAND	BULL. GEOL. GREENLAND SURV.	GARDE, A. A.		64.6611	-51.1894	0.01	2500	3175	3850	AAS	METAMORPHIC	UNKNOWN	UNKNOWN	GNEISS										5.48
84-36		GEOROC	10.1016/0016-7037(89)90176-2	RE-OS, RB-SR, AND O ISOTOPIC SYSTEMATICS OF THE ARCHEAN KOLAR SCHIST BELT, KARNATAKA, INDIA	GEOCHIM. COSMOCHIM. ACTA	WALKER, R. J.; SHIREY, S. B.; HANSON, G. N.; RAJAMANI, V.; HORAN, M. F.		13.13	78.13	0.01	2700	2700	2700	TIMS_ID	METAMORPHIC	UNKNOWN	UNKNOWN	GNEISS
84-36		GEOROC	10.1016/0016-7037(89)90176-2	RE-OS, RB-SR, AND O ISOTOPIC SYSTEMATICS OF THE ARCHEAN KOLAR SCHIST BELT, KARNATAKA, INDIA	GEOCHIM. COSMOCHIM. ACTA	WALKER, R. J.; SHIREY, S. B.; HANSON, G. N.; RAJAMANI, V.; HORAN, M. F.		13.13	78.13	0.01	2700	2700	2700	TIMS	METAMORPHIC	UNKNOWN	UNKNOWN	GNEISS
84-36		GEOROC	10.1016/0016-7037(89)90176-2	RE-OS, RB-SR, AND O ISOTOPIC SYSTEMATICS OF THE ARCHEAN KOLAR SCHIST BELT, KARNATAKA, INDIA	GEOCHIM. COSMOCHIM. ACTA	WALKER, R. J.; SHIREY, S. B.; HANSON, G. N.; RAJAMANI, V.; HORAN, M. F.		13.13	78.13	0.01	2700	2700	2700	RIMS	METAMORPHIC	UNKNOWN	UNKNOWN	GNEISS
PC-418		GEOROC	10.1093/petrology/egr014	IMPLICATIONS OF THE NUVVUAGITTUQ GREENSTONE BELT FOR THE FORMATION OF EARTHS EARLY CRUST	J. PETROL.	O^NEIL, J.; FRANCIS, D. M.; CARLSON, R. W.		58	-77	0.01				XRF	METAMORPHIC	UNKNOWN	UNKNOWN	GNEISS	51.76	0.949	15.05				10.9687	10.84	3.83	2.34	1.58	0.08	0.244
PC-418		GEOROC	10.1093/petrology/egr014	IMPLICATIONS OF THE NUVVUAGITTUQ GREENSTONE BELT FOR THE FORMATION OF EARTHS EARLY CRUST	J. PETROL.	O^NEIL, J.; FRANCIS, D. M.; CARLSON, R. W.		58	-77	0.01				IGN	METAMORPHIC	UNKNOWN	UNKNOWN	GNEISS														1.65
138		GEOROC	10.1080/00288306.1973.10421585	ISOTOPIC COMPOSITION OF STRONTIUM AND GEOLOGIC HISTORY OF THE BASEMENT ROCKS OF WRIGHT VALLEY, SOUTHERN VICTORIA LAND, ANTARCTICA	NEW ZEALAND J. GEOL. GEOPHYS.	FAURE, G.; JONES, L. M.; OWEN, L. B.		-77.27	161.25	0.01	488	494.5	501	TIMS_ID	METAMORPHIC	UNKNOWN	UNKNOWN	GNEISS
138		GEOROC	10.1080/00288306.1973.10421585	ISOTOPIC COMPOSITION OF STRONTIUM AND GEOLOGIC HISTORY OF THE BASEMENT ROCKS OF WRIGHT VALLEY, SOUTHERN VICTORIA LAND, ANTARCTICA	NEW ZEALAND J. GEOL. GEOPHYS.	FAURE, G.; JONES, L. M.; OWEN, L. B.		-77.27	161.25	0.01	488	494.5	501	TIMS	METAMORPHIC	UNKNOWN	UNKNOWN	GNEISS
RT-10H-01		GEOROC	10.1016/j.gexplo.2013.06.012	PRELIMINARY RADIOGENIC ISOTOPE STUDY ON THE ORIGIN OF THE KHANNESHIN CARBONATITE COMPLEX, HELMAND PROVINCE, AFGHANISTAN	J. GEOCHEM. EXPLORATION	AYUSO, R. A.; TUCKER, R. D.; PETERS, S.; FOLEY, N. K.; JACKSON, J.; ROBINSON, S.; BOVE, M.		30.55	63.79	0.01				TIMS_ID	METAMORPHIC	UNKNOWN	UNKNOWN	GNEISS																							42.7	7.02
RT-10H-01		GEOROC	10.1016/j.gexplo.2013.06.012	PRELIMINARY RADIOGENIC ISOTOPE STUDY ON THE ORIGIN OF THE KHANNESHIN CARBONATITE COMPLEX, HELMAND PROVINCE, AFGHANISTAN	J. GEOCHEM. EXPLORATION	AYUSO, R. A.; TUCKER, R. D.; PETERS, S.; FOLEY, N. K.; JACKSON, J.; ROBINSON, S.; BOVE, M.		30.55	63.79	0.01				TIMS	METAMORPHIC	UNKNOWN	UNKNOWN	GNEISS
TS 113		GEOROC	10.1016/j.chemgeo.2005.10.003	GEOCHEMICAL SIGNATURE OF PALEOZOIC ACCRETIONARY COMPLEXES OF THE CENTRAL ASIAN OROGENIC BELT IN SOUTH MONGOLIA: CONSTRAINTS ON ARC ENVIRONMENTS AND CRUSTAL GROWTH	CHEM. GEOL.	HELO, C.; HEGNER, E.; KRÖNER, A.; BADARCH, G.; TOMURTOGOO, O.; WINDLEY, B. F.; DULSKI, P.		45.4475	97.9776	0.01	397	397	397	XRF	METAMORPHIC	UNKNOWN	UNKNOWN	GNEISS	75.56	0.24	12.4		1.49			0.38	0.74	6.41	0.66	0.04	0.07
TS 113		GEOROC	10.1016/j.chemgeo.2005.10.003	GEOCHEMICAL SIGNATURE OF PALEOZOIC ACCRETIONARY COMPLEXES OF THE CENTRAL ASIAN OROGENIC BELT IN SOUTH MONGOLIA: CONSTRAINTS ON ARC ENVIRONMENTS AND CRUSTAL GROWTH	CHEM. GEOL.	HELO, C.; HEGNER, E.; KRÖNER, A.; BADARCH, G.; TOMURTOGOO, O.; WINDLEY, B. F.; DULSKI, P.		45.4475	97.9776	0.01	397	397	397	TIMS_ID	METAMORPHIC	UNKNOWN	UNKNOWN	GNEISS																							24.9	3.54
TS 113		GEOROC	10.1016/j.chemgeo.2005.10.003	GEOCHEMICAL SIGNATURE OF PALEOZOIC ACCRETIONARY COMPLEXES OF THE CENTRAL ASIAN OROGENIC BELT IN SOUTH MONGOLIA: CONSTRAINTS ON ARC ENVIRONMENTS AND CRUSTAL GROWTH	CHEM. GEOL.	HELO, C.; HEGNER, E.; KRÖNER, A.; BADARCH, G.; TOMURTOGOO, O.; WINDLEY, B. F.; DULSKI, P.		45.4475	97.9776	0.01	397	397	397	TIMS	METAMORPHIC	UNKNOWN	UNKNOWN	GNEISS
TS 113		GEOROC	10.1016/j.chemgeo.2005.10.003	GEOCHEMICAL SIGNATURE OF PALEOZOIC ACCRETIONARY COMPLEXES OF THE CENTRAL ASIAN OROGENIC BELT IN SOUTH MONGOLIA: CONSTRAINTS ON ARC ENVIRONMENTS AND CRUSTAL GROWTH	CHEM. GEOL.	HELO, C.; HEGNER, E.; KRÖNER, A.; BADARCH, G.; TOMURTOGOO, O.; WINDLEY, B. F.; DULSKI, P.		45.4475	97.9776	0.01	397	397	397	IGN	METAMORPHIC	UNKNOWN	UNKNOWN	GNEISS														1.19
TS 113		GEOROC	10.1016/j.chemgeo.2005.10.003	GEOCHEMICAL SIGNATURE OF PALEOZOIC ACCRETIONARY COMPLEXES OF THE CENTRAL ASIAN OROGENIC BELT IN SOUTH MONGOLIA: CONSTRAINTS ON ARC ENVIRONMENTS AND CRUSTAL GROWTH	CHEM. GEOL.	HELO, C.; HEGNER, E.; KRÖNER, A.; BADARCH, G.; TOMURTOGOO, O.; WINDLEY, B. F.; DULSKI, P.		45.4475	97.9776	0.01	397	397	397	ICPMS	METAMORPHIC	UNKNOWN	UNKNOWN	GNEISS																					41.3	72.9	7.28	23.2	3.22	0.74	2.33	0.36	2.18	0.44	1.32
183-1137A-35R-2,40-49		GEOROC	10.1093/petrology/43.7.1241	INDIAN CONTINENTAL CRUST RECOVERED FROM ELAN BANK, KERGUELEN PLATEAU (ODP LEG 183, SITE 1137)	J. PETROL.	INGLE, S. P.; WEIS, D.; FREY, F. A.	ODP	-56.8333	68.0933	0.01	65.5	105.5	145.5	XRF	METAMORPHIC	UNKNOWN	UNKNOWN	GNEISS	73.52	0.42	13.67		3.82			0.45	2.42	1.27	4.25	0.18	0.06
183-1137A-35R-2,40-49		GEOROC	10.1093/petrology/43.7.1241	INDIAN CONTINENTAL CRUST RECOVERED FROM ELAN BANK, KERGUELEN PLATEAU (ODP LEG 183, SITE 1137)	J. PETROL.	INGLE, S. P.; WEIS, D.; FREY, F. A.	ODP	-56.8333	68.0933	0.01	65.5	105.5	145.5	TIMS	METAMORPHIC	UNKNOWN	UNKNOWN	GNEISS
183-1137A-35R-2,40-49		GEOROC	10.1093/petrology/43.7.1241	INDIAN CONTINENTAL CRUST RECOVERED FROM ELAN BANK, KERGUELEN PLATEAU (ODP LEG 183, SITE 1137)	J. PETROL.	INGLE, S. P.; WEIS, D.; FREY, F. A.	ODP	-56.8333	68.0933	0.01	65.5	105.5	145.5	IGN	METAMORPHIC	UNKNOWN	UNKNOWN	GNEISS														0.4
183-1137A-35R-2,40-49		GEOROC	10.1093/petrology/43.7.1241	INDIAN CONTINENTAL CRUST RECOVERED FROM ELAN BANK, KERGUELEN PLATEAU (ODP LEG 183, SITE 1137)	J. PETROL.	INGLE, S. P.; WEIS, D.; FREY, F. A.	ODP	-56.8333	68.0933	0.01	65.5	105.5	145.5	ICPMS	METAMORPHIC	UNKNOWN	UNKNOWN	GNEISS																			69		152	16	64	12	1.9	11	1.4	8	1.4	4	0.48
N28		GEOROC	10.1016/S0040-1951(00)00058-5	ARCHAEAN CRUSTAL EVOLUTION OF THE CENTRAL KAAPVAAL CRATON, SOUTH AFRICA; EVIDENCE FROM THE JOHANNESBURG DOME	UNIV. WITWATERSRAND ECON. GEOL. RES. INF. CIRC.	ANHAEUSSER, C. R.		-26.13	25.63	0.01	2500	3175	3850	XRF	METAMORPHIC	UNKNOWN	UNKNOWN	GNEISS	57.92	0.67	15.97	1.09		5.44		4.72	6.89	4.17	1.24	0.1	0.12
N28		GEOROC	10.1016/S0040-1951(00)00058-5	ARCHAEAN CRUSTAL EVOLUTION OF THE CENTRAL KAAPVAAL CRATON, SOUTH AFRICA; EVIDENCE FROM THE JOHANNESBURG DOME	UNIV. WITWATERSRAND ECON. GEOL. RES. INF. CIRC.	ANHAEUSSER, C. R.		-26.13	25.63	0.01	2500	3175	3850	IGN	METAMORPHIC	UNKNOWN	UNKNOWN	GNEISS														1.28
N28		GEOROC	10.1016/S0040-1951(00)00058-5	ARCHAEAN CRUSTAL EVOLUTION OF THE CENTRAL KAAPVAAL CRATON, SOUTH AFRICA; EVIDENCE FROM THE JOHANNESBURG DOME	UNIV. WITWATERSRAND ECON. GEOL. RES. INF. CIRC.	ANHAEUSSER, C. R.		-26.13	25.63	0.01	2500	3175	3850	ICPMS	METAMORPHIC	UNKNOWN	UNKNOWN	GNEISS																			11.1		28.1	3.84	17.3	4.39	0.98	4.49	0.75	4.82	1	2.96	0.41
N28		GEOROC	10.1016/S0040-1951(00)00058-5	ARCHEAN CRUSTAL EVOLUTION OF THE CENTRAL KAAPVAAL CRATON, SOUTH AFRICA: EVIDENCE FROM THE JOHANNESBURG DOME	S. AFR. J. GEOL.	ANHAEUSSER, C. R.		-26.13	25.63	0.01	2500	3175	3850	XRF	METAMORPHIC	UNKNOWN	UNKNOWN	GNEISS	57.92	0.67	15.97	1.09		5.44		4.72	6.89	4.17	1.24	0.1	0.12
N28		GEOROC	10.1016/S0040-1951(00)00058-5	ARCHEAN CRUSTAL EVOLUTION OF THE CENTRAL KAAPVAAL CRATON, SOUTH AFRICA: EVIDENCE FROM THE JOHANNESBURG DOME	S. AFR. J. GEOL.	ANHAEUSSER, C. R.		-26.13	25.63	0.01	2500	3175	3850	IGN	METAMORPHIC	UNKNOWN	UNKNOWN	GNEISS														1.28
N28		GEOROC	10.1016/S0040-1951(00)00058-5	ARCHEAN CRUSTAL EVOLUTION OF THE CENTRAL KAAPVAAL CRATON, SOUTH AFRICA: EVIDENCE FROM THE JOHANNESBURG DOME	S. AFR. J. GEOL.	ANHAEUSSER, C. R.		-26.13	25.63	0.01	2500	3175	3850	ICPMS	METAMORPHIC	UNKNOWN	UNKNOWN	GNEISS																			11.1		28.1	3.84	17.3	4.39	0.98	4.49	0.75	4.82	1	2.96	0.41
OX-77		GEOROC	10.1016/S0301-9268(00)00150-9	A GRENVILLIAN ARC ON THE MARGIN OF AMAZONIA: EVIDENCE FROM THE SOUTHERN OAXACAN COMPLEX, SOUTHERN MEXICO	PREC. RESEARCH	KEPPIE, J. D.; DOSTAL, J.; CONREY, R.M.; LOPEZ, R.		17	-96.5	0.01	542	1521	2500	XRF	METAMORPHIC	UNKNOWN	UNKNOWN	GNEISS	65.81	0.58	15.75		4.04			0.83	2.81	3.03	4.42	0.16	0.07
OX-77		GEOROC	10.1016/S0301-9268(00)00150-9	A GRENVILLIAN ARC ON THE MARGIN OF AMAZONIA: EVIDENCE FROM THE SOUTHERN OAXACAN COMPLEX, SOUTHERN MEXICO	PREC. RESEARCH	KEPPIE, J. D.; DOSTAL, J.; CONREY, R.M.; LOPEZ, R.		17	-96.5	0.01	542	1521	2500	IGN	METAMORPHIC	UNKNOWN	UNKNOWN	GNEISS														1.81
OX-77		GEOROC	10.1016/S0301-9268(00)00150-9	A GRENVILLIAN ARC ON THE MARGIN OF AMAZONIA: EVIDENCE FROM THE SOUTHERN OAXACAN COMPLEX, SOUTHERN MEXICO	PREC. RESEARCH	KEPPIE, J. D.; DOSTAL, J.; CONREY, R.M.; LOPEZ, R.		17	-96.5	0.01	542	1521	2500	ICPMS	METAMORPHIC	UNKNOWN	UNKNOWN	GNEISS																			24.95		46.92	6.08	24.8	5.08	1.7	4.85	0.7	4.18	0.88	2.5	0.35
CKB71-41		GEOROC	10.1007/BF00370870	STRONTIUM AND OXYGEN ISOTOPE EVIDENCE RELATING TO THE PETROGENESIS OF THE KANGERDLUGSSUAQ ALKALINE INTRUSION, EAST GREENLAND	CONTRIB. MINERAL. PETROL.	PANKHURST, R. J.; BECKINSALE, R. D.; BROOKS, C. K.		68	-32	0.01	542	1521	2500	XRF	METAMORPHIC	UNKNOWN	UNKNOWN	GNEISS
CKB71-41		GEOROC	10.1007/BF00370870	STRONTIUM AND OXYGEN ISOTOPE EVIDENCE RELATING TO THE PETROGENESIS OF THE KANGERDLUGSSUAQ ALKALINE INTRUSION, EAST GREENLAND	CONTRIB. MINERAL. PETROL.	PANKHURST, R. J.; BECKINSALE, R. D.; BROOKS, C. K.		68	-32	0.01	542	1521	2500	TIMS	METAMORPHIC	UNKNOWN	UNKNOWN	GNEISS
11		GEOROC	10.1016/0301-9268(94)90102-3	THE NATURE AND SIGNIFICANCE OF PRE-YELLOWKNIFE SUPERGROUP ROCKS IN THE POINT LAKE AREA, SLAVE STRUCTURAL PROVINCE, CANADA	SPEC. PAP. GEOL. ASSOC. CAN.	EASTON, R. M.		65.17	-113	0.01	2500	3175	3850	NOT GIVEN	METAMORPHIC	UNKNOWN	UNKNOWN	GNEISS																			23.5		52.1	4.6	22.7	4.7	1.6	5.2		3.7		2.2
N24		GEOROC	10.1093/petrology/egp048	ARCHAEAN CRUSTAL EVOLUTION OF THE CENTRAL KAAPVAAL CRATON, SOUTH AFRICA; EVIDENCE FROM THE JOHANNESBURG DOME	UNIV. WITWATERSRAND ECON. GEOL. RES. INF. CIRC.	ANHAEUSSER, C. R.		-26.13	25.63	0.01	2500	3175	3850	XRF	METAMORPHIC	UNKNOWN	UNKNOWN	GNEISS	54.47	0.6	16.07	1.31		6.54		6.22	9.21	3.7	0.44	0.07	0.18
N24		GEOROC	10.1093/petrology/egp048	ARCHAEAN CRUSTAL EVOLUTION OF THE CENTRAL KAAPVAAL CRATON, SOUTH AFRICA; EVIDENCE FROM THE JOHANNESBURG DOME	UNIV. WITWATERSRAND ECON. GEOL. RES. INF. CIRC.	ANHAEUSSER, C. R.		-26.13	25.63	0.01	2500	3175	3850	IGN	METAMORPHIC	UNKNOWN	UNKNOWN	GNEISS														0.82
N24		GEOROC	10.1093/petrology/egp048	ARCHEAN CRUSTAL EVOLUTION OF THE CENTRAL KAAPVAAL CRATON, SOUTH AFRICA: EVIDENCE FROM THE JOHANNESBURG DOME	S. AFR. J. GEOL.	ANHAEUSSER, C. R.		-26.13	25.63	0.01	2500	3175	3850	XRF	METAMORPHIC	UNKNOWN	UNKNOWN	GNEISS	54.47	0.6	16.07	1.31		6.54		6.22	9.21	3.7	0.44	0.07	0.18
N24		GEOROC	10.1093/petrology/egp048	ARCHEAN CRUSTAL EVOLUTION OF THE CENTRAL KAAPVAAL CRATON, SOUTH AFRICA: EVIDENCE FROM THE JOHANNESBURG DOME	S. AFR. J. GEOL.	ANHAEUSSER, C. R.		-26.13	25.63	0.01	2500	3175	3850	IGN	METAMORPHIC	UNKNOWN	UNKNOWN	GNEISS														0.82
7		GEOROC	10.1007/BF00387198	THE EVOLUTION OF A SILICIC MAGMA SYSTEM: ISOTOPIC AND CHEMICAL EVIDENCE FROM THE WOODS MOUNTAINS VOLCANIC CENTER, EASTERN CALIFORNIA	CONTRIB. MINERAL. PETROL.	MUSSELWHITE, D. S.; DEPAOLO, D. J.; MCCURRY, M.		35	-115.25	0.01	15.8	15.8	15.8	XRF	METAMORPHIC	UNKNOWN	UNKNOWN	GNEISS	62.91	0.88	15.84	8.27				3.26	1.39	2.68	3.87	0.06	0.24
7		GEOROC	10.1007/BF00387198	THE EVOLUTION OF A SILICIC MAGMA SYSTEM: ISOTOPIC AND CHEMICAL EVIDENCE FROM THE WOODS MOUNTAINS VOLCANIC CENTER, EASTERN CALIFORNIA	CONTRIB. MINERAL. PETROL.	MUSSELWHITE, D. S.; DEPAOLO, D. J.; MCCURRY, M.		35	-115.25	0.01	15.8	15.8	15.8	TIMS_ID	METAMORPHIC	UNKNOWN	UNKNOWN	GNEISS																							58.8
7		GEOROC	10.1007/BF00387198	THE EVOLUTION OF A SILICIC MAGMA SYSTEM: ISOTOPIC AND CHEMICAL EVIDENCE FROM THE WOODS MOUNTAINS VOLCANIC CENTER, EASTERN CALIFORNIA	CONTRIB. MINERAL. PETROL.	MUSSELWHITE, D. S.; DEPAOLO, D. J.; MCCURRY, M.		35	-115.25	0.01	15.8	15.8	15.8	TIMS	METAMORPHIC	UNKNOWN	UNKNOWN	GNEISS
7		GEOROC	10.1007/BF00387198	THE EVOLUTION OF A SILICIC MAGMA SYSTEM: ISOTOPIC AND CHEMICAL EVIDENCE FROM THE WOODS MOUNTAINS VOLCANIC CENTER, EASTERN CALIFORNIA	CONTRIB. MINERAL. PETROL.	MUSSELWHITE, D. S.; DEPAOLO, D. J.; MCCURRY, M.		35	-115.25	0.01	15.8	15.8	15.8	INAA	METAMORPHIC	UNKNOWN	UNKNOWN	GNEISS																			72		131		66	12.6	1.42		1.9	8			2
7		GEOROC	10.1007/BF00387198	THE EVOLUTION OF A SILICIC MAGMA SYSTEM: ISOTOPIC AND CHEMICAL EVIDENCE FROM THE WOODS MOUNTAINS VOLCANIC CENTER, EASTERN CALIFORNIA	CONTRIB. MINERAL. PETROL.	MUSSELWHITE, D. S.; DEPAOLO, D. J.; MCCURRY, M.		35	-115.25	0.01	15.8	15.8	15.8	IGN	METAMORPHIC	UNKNOWN	UNKNOWN	GNEISS														1.37
B-80-1J		GEOROC	10.1016/j.gca.2014.04.025	GEOCHRONOLOGIC AND SR-ISOTOPIC STUDIES OF CERTAIN UNITS IN THE BARBERTON GRANITE-GREENSTONE TERRANE, SOUTH AFRICA	SPEC. PUBL. GEOL. SOC. S. AFR.	BARTON, J. M. JR.; ROBB, L. J.; ANHAEUSSER, C. R.; VAN NIEROP, D. A.		-26	31	0.01	2500	3175	3850	NOT GIVEN	METAMORPHIC	UNKNOWN	UNKNOWN	GNEISS
48		GEOROC	10.1080/00288306.1958.10423187	PETROGENETIC IMPLICATIONS OF THE 1954 NGAURUHOE LAVA AND ITS XENOLITHS	NEW ZEALAND J. GEOL. GEOPHYS.	STEINER, A.		-39.13	175.642	0.01				NOT GIVEN	METAMORPHIC	UNKNOWN	UNKNOWN	GNEISS	74.5	0.18	14.9	0.3		1.55		0.65	2.35	1.4	2.1				0.15	0.05
95DS-24		GEOROC	10.1016/j.precamres.2003.12.017	BASEMENT TERRANE CORRELATIONS AND CRUSTAL RECYCLING IN THE WESTERN SUPERIOR PROVINCE: ND ISOTOPIC CHARACTER OF GRANITOID AND FELSIC VOLCANIC ROCKS IN THE WABIGOON SUBPROVINCE, N. ONTARIO, CANADA	PREC. RESEARCH	TOMLINSON, K. Y.; STOTT, G. M.; PERCIVAL, J. A.; STONE, D.		49	-91.3	0.01	2500	3175	3850	TIMS_ID	METAMORPHIC	UNKNOWN	UNKNOWN	GNEISS																							12.34	1.98
95DS-24		GEOROC	10.1016/j.precamres.2003.12.017	BASEMENT TERRANE CORRELATIONS AND CRUSTAL RECYCLING IN THE WESTERN SUPERIOR PROVINCE: ND ISOTOPIC CHARACTER OF GRANITOID AND FELSIC VOLCANIC ROCKS IN THE WABIGOON SUBPROVINCE, N. ONTARIO, CANADA	PREC. RESEARCH	TOMLINSON, K. Y.; STOTT, G. M.; PERCIVAL, J. A.; STONE, D.		49	-91.3	0.01	2500	3175	3850	TIMS	METAMORPHIC	UNKNOWN	UNKNOWN	GNEISS
ATA-4A		GEOROC	10.1016/S0024-4937(99)00003-1	SR AND O ISOTOPE CONSTRAINTS ON SOURCE AND CRUSTAL CONTAMINATION IN THE HIGH-K CALC-ALKALINE AND SHOSHONITIC NEOGENE VOLCANIC ROCKS OF SE SPAIN	LITHOS	BENITO GARCIA, R.; LOPEZ RUIZ, J.; CEBRIA, J.-M.; HERTOGEN, J.; DOBLAS, M.; OYARZUN, R.; DEMAIFFE, D.		37.6	-0.98	0.01	5	11	17	XRF	METAMORPHIC	UNKNOWN	UNKNOWN	GNEISS	47.23	1.58	27.06		8.45			1.77	6.02	2.28	4.54	0.25	0.16
ATA-4A		GEOROC	10.1016/S0024-4937(99)00003-1	SR AND O ISOTOPE CONSTRAINTS ON SOURCE AND CRUSTAL CONTAMINATION IN THE HIGH-K CALC-ALKALINE AND SHOSHONITIC NEOGENE VOLCANIC ROCKS OF SE SPAIN	LITHOS	BENITO GARCIA, R.; LOPEZ RUIZ, J.; CEBRIA, J.-M.; HERTOGEN, J.; DOBLAS, M.; OYARZUN, R.; DEMAIFFE, D.		37.6	-0.98	0.01	5	11	17	MS	METAMORPHIC	UNKNOWN	UNKNOWN	GNEISS
ATA-4A		GEOROC	10.1016/S0024-4937(99)00003-1	SR AND O ISOTOPE CONSTRAINTS ON SOURCE AND CRUSTAL CONTAMINATION IN THE HIGH-K CALC-ALKALINE AND SHOSHONITIC NEOGENE VOLCANIC ROCKS OF SE SPAIN	LITHOS	BENITO GARCIA, R.; LOPEZ RUIZ, J.; CEBRIA, J.-M.; HERTOGEN, J.; DOBLAS, M.; OYARZUN, R.; DEMAIFFE, D.		37.6	-0.98	0.01	5	11	17	INAA	METAMORPHIC	UNKNOWN	UNKNOWN	GNEISS																			89		166
ATA-4A		GEOROC	10.1016/S0024-4937(99)00003-1	SR AND O ISOTOPE CONSTRAINTS ON SOURCE AND CRUSTAL CONTAMINATION IN THE HIGH-K CALC-ALKALINE AND SHOSHONITIC NEOGENE VOLCANIC ROCKS OF SE SPAIN	LITHOS	BENITO GARCIA, R.; LOPEZ RUIZ, J.; CEBRIA, J.-M.; HERTOGEN, J.; DOBLAS, M.; OYARZUN, R.; DEMAIFFE, D.		37.6	-0.98	0.01	5	11	17	IGN	METAMORPHIC	UNKNOWN	UNKNOWN	GNEISS														0.43
(16)KM136		GEOROC	10.1007/s00445-010-0417-0	ORIGIN OF THE EARLY MESOZOIC GRANITIC ROCKS IN THE HIDA TERRANE, JAPAN, AND ITS IMPLICATION FOR EVOLUTION OF THE CONTINENTAL CRUST	J. SCI. HIROSHIMA UNIV., SER. C	TANAKA, S.		35.8	136	0.01				XRF	METAMORPHIC	UNKNOWN	UNKNOWN	GNEISS	61.67	0.77	14.97	5.93				2.4	7.39		1.73		0.1
(16)KM136		GEOROC	10.1007/s00445-010-0417-0	ORIGIN OF THE EARLY MESOZOIC GRANITIC ROCKS IN THE HIDA TERRANE, JAPAN, AND ITS IMPLICATION FOR EVOLUTION OF THE CONTINENTAL CRUST	J. SCI. HIROSHIMA UNIV., SER. C	TANAKA, S.		35.8	136	0.01				TIMS	METAMORPHIC	UNKNOWN	UNKNOWN	GNEISS
(16)KM136		GEOROC	10.1007/s00445-010-0417-0	ORIGIN OF THE EARLY MESOZOIC GRANITIC ROCKS IN THE HIDA TERRANE, JAPAN, AND ITS IMPLICATION FOR EVOLUTION OF THE CONTINENTAL CRUST	J. SCI. HIROSHIMA UNIV., SER. C	TANAKA, S.		35.8	136	0.01				MS_ID	METAMORPHIC	UNKNOWN	UNKNOWN	GNEISS																							36.71	6.86
(16)KM136		GEOROC	10.1007/s00445-010-0417-0	ORIGIN OF THE EARLY MESOZOIC GRANITIC ROCKS IN THE HIDA TERRANE, JAPAN, AND ITS IMPLICATION FOR EVOLUTION OF THE CONTINENTAL CRUST	J. SCI. HIROSHIMA UNIV., SER. C	TANAKA, S.		35.8	136	0.01				AAS	METAMORPHIC	UNKNOWN	UNKNOWN	GNEISS
T163A		GEOROC	10.1093/petrology/egh082	PETROGENESIS OF PRE-CALDERA MAFIC LAVAS, JEMEZ MOUNTAINS VOLCANIC FIELD (NEW MEXICO, USA)	J. PETROL.	WOLFF, J. A.; ROWE, M. C.; TEASDALE, R.; GARDNER, J. N.; RAMOS, F. C.; HEIKOOP, C. E.		36.5	-105.5	0.01	542	1521	2500	XRF	METAMORPHIC	UNKNOWN	UNKNOWN	GNEISS	50.28	0.28	24.2		5.13			4.18	12.9	2.63	0.27	0.06	0.08
T163A		GEOROC	10.1093/petrology/egh082	PETROGENESIS OF PRE-CALDERA MAFIC LAVAS, JEMEZ MOUNTAINS VOLCANIC FIELD (NEW MEXICO, USA)	J. PETROL.	WOLFF, J. A.; ROWE, M. C.; TEASDALE, R.; GARDNER, J. N.; RAMOS, F. C.; HEIKOOP, C. E.		36.5	-105.5	0.01	542	1521	2500	TIMS	METAMORPHIC	UNKNOWN	UNKNOWN	GNEISS
T163A		GEOROC	10.1093/petrology/egh082	PETROGENESIS OF PRE-CALDERA MAFIC LAVAS, JEMEZ MOUNTAINS VOLCANIC FIELD (NEW MEXICO, USA)	J. PETROL.	WOLFF, J. A.; ROWE, M. C.; TEASDALE, R.; GARDNER, J. N.; RAMOS, F. C.; HEIKOOP, C. E.		36.5	-105.5	0.01	542	1521	2500	ICPMS	METAMORPHIC	UNKNOWN	UNKNOWN	GNEISS																			4.6		7.9	0.99	3.91	1.01	0.61	1.05	0.18	1.08	0.22	0.57	0.08
JV7		GEOROC	10.1016/j.jvolgeores.2007.10.005	THE GEOLOGY OF THE SCHAPENBURG GREENSTONE REMNANT AND SURROUNDING ARCHEAN GRANITIC TERRANE SOUTH OF BADPLAAS, EASTERN TRANSVAAL	SPEC. PUBL. GEOL. SOC. S. AFR.	ANHAEUSSER, C. R.		-26.1	30.5	0.01	2500	3175	3850	NOT GIVEN	METAMORPHIC	UNKNOWN	UNKNOWN	GNEISS	69.6	0.28	10.9		3.18			4.3	4.32	2.7	2.78	0.07	0.48	0.66
B-79-16E		GEOROC	10.1017/S0954102093000392	GEOCHRONOLOGIC AND SR-ISOTOPIC STUDIES OF CERTAIN UNITS IN THE BARBERTON GRANITE-GREENSTONE TERRANE, SOUTH AFRICA	SPEC. PUBL. GEOL. SOC. S. AFR.	BARTON, J. M. JR.; ROBB, L. J.; ANHAEUSSER, C. R.; VAN NIEROP, D. A.		-25.6	31	0.01	2500	3175	3850	NOT GIVEN	METAMORPHIC	UNKNOWN	UNKNOWN	GNEISS
B-79-17E		GEOROC	10.1007/s00410-009-0460-z	GEOCHRONOLOGIC AND SR-ISOTOPIC STUDIES OF CERTAIN UNITS IN THE BARBERTON GRANITE-GREENSTONE TERRANE, SOUTH AFRICA	SPEC. PUBL. GEOL. SOC. S. AFR.	BARTON, J. M. JR.; ROBB, L. J.; ANHAEUSSER, C. R.; VAN NIEROP, D. A.		-26.1	31	0.01	2500	3175	3850	NOT GIVEN	METAMORPHIC	UNKNOWN	UNKNOWN	GNEISS
SKW25		GEOROC	10.1016/0012-821X(87)90082-3	PB-ISOTOPIC COMPOSITION OF VOLCANIC ROCKS IN THE WEST AND EAST PHILIPPINE ISLAND ARCS: PRESENCE OF THE DUPAL ISOTOPIC ANOMALY	EARTH PLANET. SCI. LETT.	MUKASA, S. B.; MCCABE, R.; GILL, J. B.		30	120	0.01	542	1521	2500	TIMS	METAMORPHIC	UNKNOWN	UNKNOWN	GNEISS
BH127		GEOROC	10.1144/GSL.SP.1987.033.01.27	THE GEOCHEMISTRY OF THE LOWER PROTEROZOIC WILLYAMA COMPLEX VOLCANICS, BROKEN HILL BLOCK, NEW SOUTH WALES	SPEC. PUBL. GEOL. SOC. LONDON	JAMES, S. D.; PEARCE, J. A.; OLIVER, R. A.		-31.5	141	0.01				XRF	METAMORPHIC	UNKNOWN	UNKNOWN	GNEISS	52.8	2.8	11.43		20.54			2.01	6.35	2.87	0.18	0.76	0.25
BH127		GEOROC	10.1144/GSL.SP.1987.033.01.27	THE GEOCHEMISTRY OF THE LOWER PROTEROZOIC WILLYAMA COMPLEX VOLCANICS, BROKEN HILL BLOCK, NEW SOUTH WALES	SPEC. PUBL. GEOL. SOC. LONDON	JAMES, S. D.; PEARCE, J. A.; OLIVER, R. A.		-31.5	141	0.01				AAS	METAMORPHIC	UNKNOWN	UNKNOWN	GNEISS
339638		GEOROC	10.1007/BF01164596	ACCRETION AND EVOLUTION OF AN ARCHEAN HIGH-GRADE GREY GNEISS-AMPHIBOLITE COMPLEX: THE FISKEFJORD AREA, SOUTHERN WEST GREENLAND	BULL. GEOL. GREENLAND SURV.	GARDE, A. A.		65	-52	0.01	2500	3175	3850	XRF	METAMORPHIC	UNKNOWN	UNKNOWN	GNEISS	64.2	0.72	16.33				4.77	1.74	4.14		1.73	0.26	0.08						21		38		18
339638		GEOROC	10.1007/BF01164596	ACCRETION AND EVOLUTION OF AN ARCHEAN HIGH-GRADE GREY GNEISS-AMPHIBOLITE COMPLEX: THE FISKEFJORD AREA, SOUTHERN WEST GREENLAND	BULL. GEOL. GREENLAND SURV.	GARDE, A. A.		65	-52	0.01	2500	3175	3850	TIT	METAMORPHIC	UNKNOWN	UNKNOWN	GNEISS				1.38		3.53
339638		GEOROC	10.1007/BF01164596	ACCRETION AND EVOLUTION OF AN ARCHEAN HIGH-GRADE GREY GNEISS-AMPHIBOLITE COMPLEX: THE FISKEFJORD AREA, SOUTHERN WEST GREENLAND	BULL. GEOL. GREENLAND SURV.	GARDE, A. A.		65	-52	0.01	2500	3175	3850	INAA	METAMORPHIC	UNKNOWN	UNKNOWN	GNEISS																			25.5		44		20	3.09	1.16		0.3
339638		GEOROC	10.1007/BF01164596	ACCRETION AND EVOLUTION OF AN ARCHEAN HIGH-GRADE GREY GNEISS-AMPHIBOLITE COMPLEX: THE FISKEFJORD AREA, SOUTHERN WEST GREENLAND	BULL. GEOL. GREENLAND SURV.	GARDE, A. A.		65	-52	0.01	2500	3175	3850	IGN	METAMORPHIC	UNKNOWN	UNKNOWN	GNEISS														0.64
339638		GEOROC	10.1007/BF01164596	ACCRETION AND EVOLUTION OF AN ARCHEAN HIGH-GRADE GREY GNEISS-AMPHIBOLITE COMPLEX: THE FISKEFJORD AREA, SOUTHERN WEST GREENLAND	BULL. GEOL. GREENLAND SURV.	GARDE, A. A.		65	-52	0.01	2500	3175	3850	AAS	METAMORPHIC	UNKNOWN	UNKNOWN	GNEISS										4.9
339638		GEOROC	10.1007/BF01164596	ACCRETION AND EVOLUTION OF AN ARCHEAN HIGH-GRADE GREY GNEISS-AMPHIBOLITE COMPLEX: THE FISKEFJORD AREA, SOUTHERN WEST GREENLAND	BULL. GEOL. GREENLAND SURV.	GARDE, A. A.		65	-52	0.01	2500	3175	3850	XRF	METAMORPHIC	UNKNOWN	UNKNOWN	GNEISS
339638		GEOROC	10.1007/BF01164596	ACCRETION AND EVOLUTION OF AN ARCHEAN HIGH-GRADE GREY GNEISS-AMPHIBOLITE COMPLEX: THE FISKEFJORD AREA, SOUTHERN WEST GREENLAND	BULL. GEOL. GREENLAND SURV.	GARDE, A. A.		65	-52	0.01	2500	3175	3850	TIMS	METAMORPHIC	UNKNOWN	UNKNOWN	GNEISS
B87		GEOROC	10.1016/j.lithos.2004.04.051	GNEISSOSE CARBONATITE IN THE BULL^S RUN COMPLEX, NATAL	S. AFR. J. GEOL.	SCOGINGS, A. J.; FORSTER, I. F.		-27	30	0.01	542	1521	2500	NOT GIVEN	METAMORPHIC	UNKNOWN	UNKNOWN	GNEISS	16.9	0.33	6.01	0.47		2.37		0.5	39.7	0.9	2.32	0.69	0.28						286		455		199
268-52		GEOROC	10.1016/j.gr.2009.09.001	ROLE OF THE OLLO DE SAPO MASSIVE FELSIC VOLCANISM OF NW IBERIA IN THE EARLY ORDOVICIAN DYNAMICS OF NORTHERN GONDWANA	GONDWANA RES.	DIEZ MONTES, A.; MARTINEZ CATALAN, J. R.; MULAS, F. B.		42.05	-6.63	0.01	472	480	488	NOT GIVEN	METAMORPHIC	UNKNOWN	UNKNOWN	GNEISS	68.71	0.41	15.59		3.47			1.24	0.8	3.21	3.97	0.19	0.04	2.04					25.96		48.65	7.25	21.33	4.32	1.08	4.62		4.24		2.08
B-79-17C		GEOROC	10.1016/j.tecto.2009.11.013	GEOCHRONOLOGIC AND SR-ISOTOPIC STUDIES OF CERTAIN UNITS IN THE BARBERTON GRANITE-GREENSTONE TERRANE, SOUTH AFRICA	SPEC. PUBL. GEOL. SOC. S. AFR.	BARTON, J. M. JR.; ROBB, L. J.; ANHAEUSSER, C. R.; VAN NIEROP, D. A.		-26.1	31	0.01	2500	3175	3850	NOT GIVEN	METAMORPHIC	UNKNOWN	UNKNOWN	GNEISS
OES-00-6		GEOROC	10.1016/S0301-9268(02)00026-8	U-PB GEOCHRONOLOGY AND GEOCHEMISTRY OF EARLY PROTEROZOIC ROCKS OF THE TECTONIC BASEMENT WINDOWS IN CENTRAL NORDLAND, CALEDONIDES OF NORTH-CENTRAL NORWAY	PREC. RESEARCH	SKAR, O.		66	12.5	0.01				XRF	METAMORPHIC	UNKNOWN	UNKNOWN	GNEISS	68.96	0.34	16.16		2.72			0.27	0.81	3.6	6.13	0.05	0.08						100		189		88
OES-00-6		GEOROC	10.1016/S0301-9268(02)00026-8	U-PB GEOCHRONOLOGY AND GEOCHEMISTRY OF EARLY PROTEROZOIC ROCKS OF THE TECTONIC BASEMENT WINDOWS IN CENTRAL NORDLAND, CALEDONIDES OF NORTH-CENTRAL NORWAY	PREC. RESEARCH	SKAR, O.		66	12.5	0.01				IGN	METAMORPHIC	UNKNOWN	UNKNOWN	GNEISS														0.24
E99021_LEACHATE		GEOROC	10.2113/gsecongeo.96.6.1361	RADIOGENIC LEAD SIGNATURES IN AU-RICH VOLCANIC-HOSTED MASSIVE SULFIDE ORES AND ASSOCIATED VOLCANIC ROCKS OF THE EARLY TERTIARY MACUCHI ISLAND ARC (WESTERN CORDILLERA OF ECUADOR)	ECON. GEOL.	CHIARADIA, M.; FONTBOTE, L.		-4.05	-78.97	0.01	201.6	226.3	251	TIMS	METAMORPHIC	UNKNOWN	UNKNOWN	GNEISS
GS92-113		GEOROC	10.1007/BF00302828	ASSESSMENT OF A SHALLOW MAGMATIC SYSTEM: THE 1888-90 ERUPTION, VULCANO ISLAND, ITALY	BULL. VOLCANOL.	CLOCCHIATTI, R.; DEL MORO, A.; GIONCADA, A.; JORON, J.-L.; MOSBAH, M.; PINARELLI, L.; SBRANA, A.		38.38	14.97	0.01				MS_ID	METAMORPHIC	UNKNOWN	UNKNOWN	GNEISS
PC-409		GEOROC	10.1093/petrology/egr014	IMPLICATIONS OF THE NUVVUAGITTUQ GREENSTONE BELT FOR THE FORMATION OF EARTHS EARLY CRUST	J. PETROL.	O^NEIL, J.; FRANCIS, D. M.; CARLSON, R. W.		58	-77	0.01				XRF	METAMORPHIC	UNKNOWN	UNKNOWN	GNEISS	47.48	0.406	13.01				13.7041	16.64	3.2	0.41	0.73	0.037	0.192
PC-409		GEOROC	10.1093/petrology/egr014	IMPLICATIONS OF THE NUVVUAGITTUQ GREENSTONE BELT FOR THE FORMATION OF EARTHS EARLY CRUST	J. PETROL.	O^NEIL, J.; FRANCIS, D. M.; CARLSON, R. W.		58	-77	0.01				IGN	METAMORPHIC	UNKNOWN	UNKNOWN	GNEISS														3.08
GR04066		GEOROC	10.1016/j.gca.2006.05.014	CHEMICAL AND ISOTOPIC EVIDENCE FOR WIDESPREAD EOARCHEAN METASEDIMENTARY ENCLAVES IN SOUTHERN WEST GREENLAND	GEOCHIM. COSMOCHIM. ACTA	CATES, N. L.; MOJZSIS, S. J.		-20.25	30	0.01				NOT GIVEN	METAMORPHIC	UNKNOWN	UNKNOWN	GNEISS	62.22	1.16	16.02		7.59			2	3.8	3.32	2.37	0.29	0.17	0.7					12		27	3.6	15	3.5	1.3	3.4	0.54	3.1	0.6	1.7
ET11		GEOROC	10.1016/S0899-5362(98)00006-2	GEOCHEMISTRY, PB-PB SINGLE ZIRCON AGES AND ND-SR ISOTOPE COMPOSITION OF PRECAMBRIAN ROCKS FROM SOUTHERN AND EASTERN ETHIOPIA: IMPLICATIONS FOR CRUSTAL EVOLUTION IN EAST AFRICA	J. AFR. EARTH SCI.	TEKLAY, M.; KRÖNER, A.; MEZGER, J. E.; OBERHÄNSLI, R. E.		4	39	0.01				XRF	METAMORPHIC	UNKNOWN	UNKNOWN	GNEISS	59.89	1.29	16.34	2.13				1.75	3.7	4.51	4.38	0.48	0.12
ET11		GEOROC	10.1016/S0899-5362(98)00006-2	GEOCHEMISTRY, PB-PB SINGLE ZIRCON AGES AND ND-SR ISOTOPE COMPOSITION OF PRECAMBRIAN ROCKS FROM SOUTHERN AND EASTERN ETHIOPIA: IMPLICATIONS FOR CRUSTAL EVOLUTION IN EAST AFRICA	J. AFR. EARTH SCI.	TEKLAY, M.; KRÖNER, A.; MEZGER, J. E.; OBERHÄNSLI, R. E.		4	39	0.01				TIT	METAMORPHIC	UNKNOWN	UNKNOWN	GNEISS						3.3
ET11		GEOROC	10.1016/S0899-5362(98)00006-2	GEOCHEMISTRY, PB-PB SINGLE ZIRCON AGES AND ND-SR ISOTOPE COMPOSITION OF PRECAMBRIAN ROCKS FROM SOUTHERN AND EASTERN ETHIOPIA: IMPLICATIONS FOR CRUSTAL EVOLUTION IN EAST AFRICA	J. AFR. EARTH SCI.	TEKLAY, M.; KRÖNER, A.; MEZGER, J. E.; OBERHÄNSLI, R. E.		4	39	0.01				IGN	METAMORPHIC	UNKNOWN	UNKNOWN	GNEISS														0.75
B-78-13B		GEOROC	10.1016/j.lithos.2004.04.001	GEOCHRONOLOGIC AND SR-ISOTOPIC STUDIES OF CERTAIN UNITS IN THE BARBERTON GRANITE-GREENSTONE TERRANE, SOUTH AFRICA	SPEC. PUBL. GEOL. SOC. S. AFR.	BARTON, J. M. JR.; ROBB, L. J.; ANHAEUSSER, C. R.; VAN NIEROP, D. A.		-26.15	30.5	0.01	2500	3175	3850	NOT GIVEN	METAMORPHIC	UNKNOWN	UNKNOWN	GNEISS
B-78-12G		GEOROC	10.3720/japt.57.91	GEOCHRONOLOGIC AND SR-ISOTOPIC STUDIES OF CERTAIN UNITS IN THE BARBERTON GRANITE-GREENSTONE TERRANE, SOUTH AFRICA	SPEC. PUBL. GEOL. SOC. S. AFR.	BARTON, J. M. JR.; ROBB, L. J.; ANHAEUSSER, C. R.; VAN NIEROP, D. A.		-26.1	31	0.01	2500	3175	3850	NOT GIVEN	METAMORPHIC	UNKNOWN	UNKNOWN	GNEISS
B-80-1D		GEOROC	10.1007/s00531-013-0898-0	GEOCHRONOLOGIC AND SR-ISOTOPIC STUDIES OF CERTAIN UNITS IN THE BARBERTON GRANITE-GREENSTONE TERRANE, SOUTH AFRICA	SPEC. PUBL. GEOL. SOC. S. AFR.	BARTON, J. M. JR.; ROBB, L. J.; ANHAEUSSER, C. R.; VAN NIEROP, D. A.		-26	31	0.01	2500	3175	3850	NOT GIVEN	METAMORPHIC	UNKNOWN	UNKNOWN	GNEISS
268-59		GEOROC	10.1016/j.gr.2009.09.001	ROLE OF THE OLLO DE SAPO MASSIVE FELSIC VOLCANISM OF NW IBERIA IN THE EARLY ORDOVICIAN DYNAMICS OF NORTHERN GONDWANA	GONDWANA RES.	DIEZ MONTES, A.; MARTINEZ CATALAN, J. R.; MULAS, F. B.		42.05	-6.63	0.01	472	480	488	NOT GIVEN	METAMORPHIC	UNKNOWN	UNKNOWN	GNEISS	67.8	0.49	15.89		3.94			1.3	0.69	2.79	4.38	0.2	0.06	2.16					29.37		71.05	8.59	28.88	5.3	1.08	5.57		5.14		3.03
107		GEOROC	10.1016/S0024-4937(02)00250-5	PB ISOTOPE EVIDENCE FOR CONTRIBUTIONS FROM DIFFERENT ICELAND MANTLE COMPONENTS TO PALEOGENE EAST GREENLAND FLOOD BASALTS		SCHÜRMANN, H. M. E.		27.83	33.23	0.01				NOT GIVEN	METAMORPHIC	UNKNOWN	UNKNOWN	GNEISS	65.5	0.71	16.1	0.85		3.3		2.05	4.61	4	1.54	0.15	0.03				1.33
OES-00-5		GEOROC	10.1016/S0301-9268(02)00026-8	U-PB GEOCHRONOLOGY AND GEOCHEMISTRY OF EARLY PROTEROZOIC ROCKS OF THE TECTONIC BASEMENT WINDOWS IN CENTRAL NORDLAND, CALEDONIDES OF NORTH-CENTRAL NORWAY	PREC. RESEARCH	SKAR, O.		66	12.5	0.01				XRF	METAMORPHIC	UNKNOWN	UNKNOWN	GNEISS	63	0.98	16.58		5.26			1.52	2.15	3.11	5.35	0.36	0.12						52		101		48
OES-00-5		GEOROC	10.1016/S0301-9268(02)00026-8	U-PB GEOCHRONOLOGY AND GEOCHEMISTRY OF EARLY PROTEROZOIC ROCKS OF THE TECTONIC BASEMENT WINDOWS IN CENTRAL NORDLAND, CALEDONIDES OF NORTH-CENTRAL NORWAY	PREC. RESEARCH	SKAR, O.		66	12.5	0.01				IGN	METAMORPHIC	UNKNOWN	UNKNOWN	GNEISS														0.39
XAYA-39		GEOROC	10.1016/j.tecto.2008.01.010	ORDOVICIAN-EARLIEST SILURIAN RIFT THOLEIITES IN THE ACATLÁN COMPLEX, SOUTHERN MEXICO: EVIDENCE OF RIFTING ON THE SOUTHERN MARGIN OF THE RHEIC OCEAN	TECTONOPHYSICS	KEPPIE, J. D.; DOSTAL, J.; MILLER, B. V.; RAMOS-ARIAS, M. A.; MORALES-GAMEZ, M.; NANCE, R. D.; MURPHY, J. B.; ORTEGA-RIVERA, A.; LEE, J. W. K.; COOPER, P.		18.25	-98	0.01	251	396.5	542	XRF	METAMORPHIC	UNKNOWN	UNKNOWN	GNEISS	46.56	0.83	16.63		11.44			8.07	8.7	1.59	2.49	0.02	0.2
XAYA-39		GEOROC	10.1016/j.tecto.2008.01.010	ORDOVICIAN-EARLIEST SILURIAN RIFT THOLEIITES IN THE ACATLÁN COMPLEX, SOUTHERN MEXICO: EVIDENCE OF RIFTING ON THE SOUTHERN MARGIN OF THE RHEIC OCEAN	TECTONOPHYSICS	KEPPIE, J. D.; DOSTAL, J.; MILLER, B. V.; RAMOS-ARIAS, M. A.; MORALES-GAMEZ, M.; NANCE, R. D.; MURPHY, J. B.; ORTEGA-RIVERA, A.; LEE, J. W. K.; COOPER, P.		18.25	-98	0.01	251	396.5	542	IGN	METAMORPHIC	UNKNOWN	UNKNOWN	GNEISS														2.45
XAYA-39		GEOROC	10.1016/j.tecto.2008.01.010	ORDOVICIAN-EARLIEST SILURIAN RIFT THOLEIITES IN THE ACATLÁN COMPLEX, SOUTHERN MEXICO: EVIDENCE OF RIFTING ON THE SOUTHERN MARGIN OF THE RHEIC OCEAN	TECTONOPHYSICS	KEPPIE, J. D.; DOSTAL, J.; MILLER, B. V.; RAMOS-ARIAS, M. A.; MORALES-GAMEZ, M.; NANCE, R. D.; MURPHY, J. B.; ORTEGA-RIVERA, A.; LEE, J. W. K.; COOPER, P.		18.25	-98	0.01	251	396.5	542	ICPMS	METAMORPHIC	UNKNOWN	UNKNOWN	GNEISS																			18.6		47.6	6.76	28.2	6.01	1.47	5.1	0.761	4.32	0.877	2.45	0.362
278755		GEOROC	10.1016/0040-1951(91)90150-Q	ACCRETION AND EVOLUTION OF AN ARCHEAN HIGH-GRADE GREY GNEISS-AMPHIBOLITE COMPLEX: THE FISKEFJORD AREA, SOUTHERN WEST GREENLAND	BULL. GEOL. GREENLAND SURV.	GARDE, A. A.		64.9495	-51.2403	0.01	2500	3175	3850	XRF	METAMORPHIC	UNKNOWN	UNKNOWN	GNEISS
278755		GEOROC	10.1016/0040-1951(91)90150-Q	ACCRETION AND EVOLUTION OF AN ARCHEAN HIGH-GRADE GREY GNEISS-AMPHIBOLITE COMPLEX: THE FISKEFJORD AREA, SOUTHERN WEST GREENLAND	BULL. GEOL. GREENLAND SURV.	GARDE, A. A.		64.9495	-51.2403	0.01	2500	3175	3850	TIMS	METAMORPHIC	UNKNOWN	UNKNOWN	GNEISS
R72945		GEOROC	10.1016/0024-4937(96)00011-4	GEOCHEMISTRY AND AGE OF METAMORPHOSED FELSIC IGNEOUS ROCKS WITH A-TYPE AFFINITIES IN THE WILLYAMA SUPERGROUP, OLARY BLOCK, SOUTH AUSTRALIA, AND IMPLICATIONS FOR MINERAL EXPLORATION	LITHOS	ASHLEY, P. M.; COOK, N. D. J.; FANNING, C. M.		-32.196	140.253	0.01				NOT GIVEN	METAMORPHIC	UNKNOWN	UNKNOWN	GNEISS	73.19	0.24	10.07		9.86			0.08	0.16	4.26	1.27	0.1	0.01						46		100		54
R72945		GEOROC	10.1016/0024-4937(96)00011-4	GEOCHEMISTRY AND AGE OF METAMORPHOSED FELSIC IGNEOUS ROCKS WITH A-TYPE AFFINITIES IN THE WILLYAMA SUPERGROUP, OLARY BLOCK, SOUTH AUSTRALIA, AND IMPLICATIONS FOR MINERAL EXPLORATION	LITHOS	ASHLEY, P. M.; COOK, N. D. J.; FANNING, C. M.		-32.196	140.253	0.01				IGN	METAMORPHIC	UNKNOWN	UNKNOWN	GNEISS														0.48
3/287		GEOROC	10.1093/petroj/40.10.1527	CRUSTAL RECYCLING OF METAMORPHIC BASEMENT: LATE PALEOZOIC GRANITOIDS OF NORTHERN CHILE (ABOUT 22°S). IMPLICATIONS FOR THE COMPOSITION OF THE ANDEAN CRUST	J. PETROL.	LUCASSEN, F.; FRANZ, G.; THIRLWALL, M. F.; MEZGER, K.		-22	-69	0.01				MS_ID	METAMORPHIC	UNKNOWN	UNKNOWN	GNEISS																							35.36	7.73
3/287		GEOROC	10.1093/petroj/40.10.1527	CRUSTAL RECYCLING OF METAMORPHIC BASEMENT: LATE PALEOZOIC GRANITOIDS OF NORTHERN CHILE (ABOUT 22°S). IMPLICATIONS FOR THE COMPOSITION OF THE ANDEAN CRUST	J. PETROL.	LUCASSEN, F.; FRANZ, G.; THIRLWALL, M. F.; MEZGER, K.		-22	-69	0.01				XRF	METAMORPHIC	UNKNOWN	UNKNOWN	GNEISS	61.37	1.32	17.01		9.12			2.48	3.27	1.53	2.44	0.27	0.12	1.96
3/287		GEOROC	10.1093/petroj/40.10.1527	CRUSTAL RECYCLING OF METAMORPHIC BASEMENT: LATE PALEOZOIC GRANITOIDS OF NORTHERN CHILE (ABOUT 22°S). IMPLICATIONS FOR THE COMPOSITION OF THE ANDEAN CRUST	J. PETROL.	LUCASSEN, F.; FRANZ, G.; THIRLWALL, M. F.; MEZGER, K.		-22	-69	0.01				ICPAES	METAMORPHIC	UNKNOWN	UNKNOWN	GNEISS																			27		51	7.5	29	6.3	1.4	5.5		5.2	1	3
339647		GEOROC	10.1016/j.lithos.2006.03.027	ACCRETION AND EVOLUTION OF AN ARCHEAN HIGH-GRADE GREY GNEISS-AMPHIBOLITE COMPLEX: THE FISKEFJORD AREA, SOUTHERN WEST GREENLAND	BULL. GEOL. GREENLAND SURV.	GARDE, A. A.		65	-52	0.01	2500	3175	3850	XRF	METAMORPHIC	UNKNOWN	UNKNOWN	GNEISS
339647		GEOROC	10.1016/j.lithos.2006.03.027	ACCRETION AND EVOLUTION OF AN ARCHEAN HIGH-GRADE GREY GNEISS-AMPHIBOLITE COMPLEX: THE FISKEFJORD AREA, SOUTHERN WEST GREENLAND	BULL. GEOL. GREENLAND SURV.	GARDE, A. A.		65	-52	0.01	2500	3175	3850	TIMS	METAMORPHIC	UNKNOWN	UNKNOWN	GNEISS
B-78-12I		GEOROC	10.1093/petrology/egt025	GEOCHRONOLOGIC AND SR-ISOTOPIC STUDIES OF CERTAIN UNITS IN THE BARBERTON GRANITE-GREENSTONE TERRANE, SOUTH AFRICA	SPEC. PUBL. GEOL. SOC. S. AFR.	BARTON, J. M. JR.; ROBB, L. J.; ANHAEUSSER, C. R.; VAN NIEROP, D. A.		-26.1	31	0.01	2500	3175	3850	NOT GIVEN	METAMORPHIC	UNKNOWN	UNKNOWN	GNEISS
E99224		GEOROC	10.2113/gsecongeo.96.6.1361	RADIOGENIC LEAD SIGNATURES IN AU-RICH VOLCANIC-HOSTED MASSIVE SULFIDE ORES AND ASSOCIATED VOLCANIC ROCKS OF THE EARLY TERTIARY MACUCHI ISLAND ARC (WESTERN CORDILLERA OF ECUADOR)	ECON. GEOL.	CHIARADIA, M.; FONTBOTE, L.		-1.38	-78.37	0.01				XRF	METAMORPHIC	UNKNOWN	UNKNOWN	GNEISS	83.8	0.42	8.61		2.26			0.72	0.28	1.31	1.88	0.04	0.03								60		24
E99224		GEOROC	10.2113/gsecongeo.96.6.1361	RADIOGENIC LEAD SIGNATURES IN AU-RICH VOLCANIC-HOSTED MASSIVE SULFIDE ORES AND ASSOCIATED VOLCANIC ROCKS OF THE EARLY TERTIARY MACUCHI ISLAND ARC (WESTERN CORDILLERA OF ECUADOR)	ECON. GEOL.	CHIARADIA, M.; FONTBOTE, L.		-1.38	-78.37	0.01				IGN	METAMORPHIC	UNKNOWN	UNKNOWN	GNEISS														1.19
G92-25		GEOROC	10.2113/gsecongeo.90.5.1217	RARE EARTH ELEMENT GEOCHEMISTRY OF THE METAMORPHOSED VOLCANOGENIC MASSIVE SULFIDE DEPOSITS OF THE MANITOUWADGE MINING CAMP, SUPERIOR PROVINCE, CANADA: A POTENTIAL EXPLORATION TOOL?	ECON. GEOL.	SCHANDL, E. S.; GORTON, M. P.; WASTENEYS, H A.		49.2	-85.83	0.01	2500	3175	3850	XRF	METAMORPHIC	UNKNOWN	UNKNOWN	GNEISS	56.5	0.86	17		7.93			3.99	5.47	3.53	1.93	0.36	0.14
G92-25		GEOROC	10.2113/gsecongeo.90.5.1217	RARE EARTH ELEMENT GEOCHEMISTRY OF THE METAMORPHOSED VOLCANOGENIC MASSIVE SULFIDE DEPOSITS OF THE MANITOUWADGE MINING CAMP, SUPERIOR PROVINCE, CANADA: A POTENTIAL EXPLORATION TOOL?	ECON. GEOL.	SCHANDL, E. S.; GORTON, M. P.; WASTENEYS, H A.		49.2	-85.83	0.01	2500	3175	3850	INAA	METAMORPHIC	UNKNOWN	UNKNOWN	GNEISS					7.65					3.54									40.28		95.42		38.37	8.14	1.94		0.76
G92-25		GEOROC	10.2113/gsecongeo.90.5.1217	RARE EARTH ELEMENT GEOCHEMISTRY OF THE METAMORPHOSED VOLCANOGENIC MASSIVE SULFIDE DEPOSITS OF THE MANITOUWADGE MINING CAMP, SUPERIOR PROVINCE, CANADA: A POTENTIAL EXPLORATION TOOL?	ECON. GEOL.	SCHANDL, E. S.; GORTON, M. P.; WASTENEYS, H A.		49.2	-85.83	0.01	2500	3175	3850	IGN	METAMORPHIC	UNKNOWN	UNKNOWN	GNEISS														1.35
ET9		GEOROC	10.1016/S0899-5362(98)00006-2	GEOCHEMISTRY, PB-PB SINGLE ZIRCON AGES AND ND-SR ISOTOPE COMPOSITION OF PRECAMBRIAN ROCKS FROM SOUTHERN AND EASTERN ETHIOPIA: IMPLICATIONS FOR CRUSTAL EVOLUTION IN EAST AFRICA	J. AFR. EARTH SCI.	TEKLAY, M.; KRÖNER, A.; MEZGER, J. E.; OBERHÄNSLI, R. E.		4	39	0.01				XRF	METAMORPHIC	UNKNOWN	UNKNOWN	GNEISS	69.02	0.55	14.45	2.44				0.51	0.68	4.87	5.82	0.06	0.12
ET9		GEOROC	10.1016/S0899-5362(98)00006-2	GEOCHEMISTRY, PB-PB SINGLE ZIRCON AGES AND ND-SR ISOTOPE COMPOSITION OF PRECAMBRIAN ROCKS FROM SOUTHERN AND EASTERN ETHIOPIA: IMPLICATIONS FOR CRUSTAL EVOLUTION IN EAST AFRICA	J. AFR. EARTH SCI.	TEKLAY, M.; KRÖNER, A.; MEZGER, J. E.; OBERHÄNSLI, R. E.		4	39	0.01				TIT	METAMORPHIC	UNKNOWN	UNKNOWN	GNEISS						1.13
ET9		GEOROC	10.1016/S0899-5362(98)00006-2	GEOCHEMISTRY, PB-PB SINGLE ZIRCON AGES AND ND-SR ISOTOPE COMPOSITION OF PRECAMBRIAN ROCKS FROM SOUTHERN AND EASTERN ETHIOPIA: IMPLICATIONS FOR CRUSTAL EVOLUTION IN EAST AFRICA	J. AFR. EARTH SCI.	TEKLAY, M.; KRÖNER, A.; MEZGER, J. E.; OBERHÄNSLI, R. E.		4	39	0.01				IGN	METAMORPHIC	UNKNOWN	UNKNOWN	GNEISS														0.48
GH24		GEOROC	10.1016/j.precamres.2004.12.002	THE EGLAB MASSIF IN THE WEST AFRICAN CRATON (ALGERIA), AN ORIGINAL SEGMENT OF THE EBURNEAN OROGENIC BELT: PETROLOGY, GEOCHEMISTRY AND GEOCHRONOLOGY	PREC. RESEARCH	PEUCAT, J. J.; CAPDEVILA, R.; DRARENI, A.; MAHDJOUB, Y.; KAHOUI, M.		26	-3	0.01	2500	3175	3850	IGN	METAMORPHIC	UNKNOWN	UNKNOWN	GNEISS														1.05
GH24		GEOROC	10.1016/j.precamres.2004.12.002	THE EGLAB MASSIF IN THE WEST AFRICAN CRATON (ALGERIA), AN ORIGINAL SEGMENT OF THE EBURNEAN OROGENIC BELT: PETROLOGY, GEOCHEMISTRY AND GEOCHRONOLOGY	PREC. RESEARCH	PEUCAT, J. J.; CAPDEVILA, R.; DRARENI, A.; MAHDJOUB, Y.; KAHOUI, M.		26	-3	0.01	2500	3175	3850	ICPMS	METAMORPHIC	UNKNOWN	UNKNOWN	GNEISS																			10.7		28.9	4.26	20.9	6.83	2	9.12	1.75	12.2	2.67	8.01	1.28
GH24		GEOROC	10.1016/j.precamres.2004.12.002	THE EGLAB MASSIF IN THE WEST AFRICAN CRATON (ALGERIA), AN ORIGINAL SEGMENT OF THE EBURNEAN OROGENIC BELT: PETROLOGY, GEOCHEMISTRY AND GEOCHRONOLOGY	PREC. RESEARCH	PEUCAT, J. J.; CAPDEVILA, R.; DRARENI, A.; MAHDJOUB, Y.; KAHOUI, M.		26	-3	0.01	2500	3175	3850	ICPAES	METAMORPHIC	UNKNOWN	UNKNOWN	GNEISS	71.6	0.38	11.49		7.15			0.71	3.39	3.42	0.44	0.05	0.15
CJ19		GEOROC	10.1016/S0024-4937(98)00015-2	PETROGENESIS OF THE PALEOPROTEROZOIC BASALT-ANDESITE-RHYOLITE DYKE ASSOCIATION IN THE CARAJÁS REGION, AMAZONIAN CRATON	LITHOS	RIVALENTI, G.; MAZZUCCHELLI, M.; GIRARDI, V. A. V.; CAVAZZINI, G.; FINATTI, C.; BARBIERI, MARIA A.; TEIXEIRA, W.		-6.63	-51.98	0.01				XRF	METAMORPHIC	UNKNOWN	UNKNOWN	GNEISS	68.8	0.32	14.48	0.6		4.47		3.76	0.95	5.92	0.51	0.09	0.09						175		275		83
3324		GEOROC	10.1016/0016-7037(80)90201-X	U-PB AND RB-SR SYSTEMATICS OF THE SUOMUSSALMI ARCHEAN GREENSTONE BELT (EASTERN FINLAND)	GEOCHIM. COSMOCHIM. ACTA	VIDAL, P.; BLAIS, S.; JAHN, B.-M.; CAPDEVILA, R.; TILTON, G. R.		64.5	29.75	0.01	2550	2680	2810	TIMS_ID	METAMORPHIC	UNKNOWN	UNKNOWN	GNEISS
3324		GEOROC	10.1016/0016-7037(80)90201-X	U-PB AND RB-SR SYSTEMATICS OF THE SUOMUSSALMI ARCHEAN GREENSTONE BELT (EASTERN FINLAND)	GEOCHIM. COSMOCHIM. ACTA	VIDAL, P.; BLAIS, S.; JAHN, B.-M.; CAPDEVILA, R.; TILTON, G. R.		64.5	29.75	0.01	2550	2680	2810	TIMS	METAMORPHIC	UNKNOWN	UNKNOWN	GNEISS
3324		GEOROC	10.1016/0016-7037(80)90201-X	U-PB AND RB-SR SYSTEMATICS OF THE SUOMUSSALMI ARCHEAN GREENSTONE BELT (EASTERN FINLAND)	GEOCHIM. COSMOCHIM. ACTA	VIDAL, P.; BLAIS, S.; JAHN, B.-M.; CAPDEVILA, R.; TILTON, G. R.		64.5	29.75	0.01	2550	2680	2810	TIMS	METAMORPHIC	UNKNOWN	UNKNOWN	GNEISS
324721		GEOROC	10.2973/odp.proc.sr.152.233.1998	VOLCANIC ROCKS FROM THE EAST GREENLAND MARGIN AT 63° N: COMPOSITION, PETROGENESIS AND MANTLE SOURCES	PROC. OCEAN DRILL. PROGRAM, SCIENT. RESULTS	FITTON, J. G.; SAUNDERS, A. D.; LARSEN, H. C.; HARDARSON, B. S.; NORRY, M. J.		63	-40	0.01	2500	3175	3850	XRF	METAMORPHIC	UNKNOWN	UNKNOWN	GNEISS	63.64	0.777	16.95		4.21			1.61	3.39	4.15	3.921	0.339	0.056
324721		GEOROC	10.2973/odp.proc.sr.152.233.1998	VOLCANIC ROCKS FROM THE EAST GREENLAND MARGIN AT 63° N: COMPOSITION, PETROGENESIS AND MANTLE SOURCES	PROC. OCEAN DRILL. PROGRAM, SCIENT. RESULTS	FITTON, J. G.; SAUNDERS, A. D.; LARSEN, H. C.; HARDARSON, B. S.; NORRY, M. J.		63	-40	0.01	2500	3175	3850	IGN	METAMORPHIC	UNKNOWN	UNKNOWN	GNEISS														0.32
G-5		GEOROC	10.1144/GSL.SP.1996.112.01.15	MESOPROTEROZOIC ANOROGENIC MAGMATISM IN SOUTHERN NORWAY	SPEC. PUBL. GEOL. SOC. LONDON	MENUGE, J. F.; BREWER, T. S.		59.5	8.6	0.01				TIMS_ID	METAMORPHIC	UNKNOWN	UNKNOWN	GNEISS																							100.1	15.76
G-5		GEOROC	10.1144/GSL.SP.1996.112.01.15	MESOPROTEROZOIC ANOROGENIC MAGMATISM IN SOUTHERN NORWAY	SPEC. PUBL. GEOL. SOC. LONDON	MENUGE, J. F.; BREWER, T. S.		59.5	8.6	0.01				TIMS	METAMORPHIC	UNKNOWN	UNKNOWN	GNEISS
3(73KM133-4)		GEOROC	10.5575/geosoc.86.687	GEOLOGICAL STUDY OF THE NORTHERN-HALF OF WESTERN PART OF HIDA METAMORPHIC REGION, CENTRAL JAPAN.	J. GEOL. SOC. JAPAN	KANO, T.		35.8	136	0.01				NOT GIVEN	METAMORPHIC	UNKNOWN	UNKNOWN	GNEISS	69.36	0.5	10.98	0.92		3.02		1.34	10.52	1.95	0.19	0.14	0.12	1.25
109		GEOROC	10.1016/0024-4937(84)90006-9	MAGMA MIXING IN THE POST-GLACIAL VEIDIVÖTN FISSURE ERUPTION, SOUTHEAST ICELAND: A MICROPROBE STUDY OF MINERAL AND GLASS VARIATIONS		SCHÜRMANN, H. M. E.		25	34	0.01				NOT GIVEN	METAMORPHIC	UNKNOWN	UNKNOWN	GNEISS	80.18	0.09	10.95	1.08		0.1		0.38	0.36	2.38	4.4						0.35
191TTT 97-1		GEOROC	10.1016/j.jvolgeores.2005.06.003	ARCHEAN EVOLUTION OF THE TIPASJÄRVI-KUHMO-SUOMUSSALMI GREENSTONE COMPLEX, FINLAND	BULL. GEOL. SURV. FINLAND	PAPUNEN, H.; HALKOAHO, T.; LUUKKONEN, E:		64.4838	29.4663	0.01	2500	3175	3850	XRF	METAMORPHIC	UNKNOWN	UNKNOWN	GNEISS	54.2	0.858	20.6				8.24	4.68	0.53	0.61	4.1	0.054	0.115
191TTT 97-1		GEOROC	10.1016/j.jvolgeores.2005.06.003	ARCHEAN EVOLUTION OF THE TIPASJÄRVI-KUHMO-SUOMUSSALMI GREENSTONE COMPLEX, FINLAND	BULL. GEOL. SURV. FINLAND	PAPUNEN, H.; HALKOAHO, T.; LUUKKONEN, E:		64.4838	29.4663	0.01	2500	3175	3850	NOT GIVEN	METAMORPHIC	UNKNOWN	UNKNOWN	GNEISS																			10		10
191TTT 97-1		GEOROC	10.1016/j.jvolgeores.2005.06.003	ARCHEAN EVOLUTION OF THE TIPASJÄRVI-KUHMO-SUOMUSSALMI GREENSTONE COMPLEX, FINLAND	BULL. GEOL. SURV. FINLAND	PAPUNEN, H.; HALKOAHO, T.; LUUKKONEN, E:		64.4838	29.4663	0.01	2500	3175	3850	IGN	METAMORPHIC	UNKNOWN	UNKNOWN	GNEISS														4.81
SM/AC18		GEOROC	10.1016/j.gca.2005.08.015	HIGH-PRECISION 142ND/144ND MEASUREMENTS IN TERRESTRIAL ROCKS: CONSTRAINTS ON THE EARLY DIFFERENTIATION OF THE EARTH^S MANTLE	GEOCHIM. COSMOCHIM. ACTA	CARO, G.; BOURDON, B.; BIRCK, J.-L.; MOORBATH, S.		65	-115.5	0.01	2500	3175	3850	TIMS	METAMORPHIC	UNKNOWN	UNKNOWN	GNEISS
DD86-24		GEOROC	10.1016/j.precamres.2003.12.017	BASEMENT TERRANE CORRELATIONS AND CRUSTAL RECYCLING IN THE WESTERN SUPERIOR PROVINCE: ND ISOTOPIC CHARACTER OF GRANITOID AND FELSIC VOLCANIC ROCKS IN THE WABIGOON SUBPROVINCE, N. ONTARIO, CANADA	PREC. RESEARCH	TOMLINSON, K. Y.; STOTT, G. M.; PERCIVAL, J. A.; STONE, D.		49.9	-90.2	0.01	2500	3175	3850	TIMS_ID	METAMORPHIC	UNKNOWN	UNKNOWN	GNEISS																							14.34	1.59
DD86-24		GEOROC	10.1016/j.precamres.2003.12.017	BASEMENT TERRANE CORRELATIONS AND CRUSTAL RECYCLING IN THE WESTERN SUPERIOR PROVINCE: ND ISOTOPIC CHARACTER OF GRANITOID AND FELSIC VOLCANIC ROCKS IN THE WABIGOON SUBPROVINCE, N. ONTARIO, CANADA	PREC. RESEARCH	TOMLINSON, K. Y.; STOTT, G. M.; PERCIVAL, J. A.; STONE, D.		49.9	-90.2	0.01	2500	3175	3850	TIMS	METAMORPHIC	UNKNOWN	UNKNOWN	GNEISS
LAM 3		GEOROC	10.1016/0024-4937(93)90016-6	EARLY ORDOVICIAN CONTINENTAL BREAK-UP IN VARISCAN EUROPE: ND-SR ISOTOPE AND TRACE ELEMENT EVIDENCE FROM BIMODAL IGNEOUS ASSOCIATIONS OF THE SOUTHERN MASSIF CENTRAL, FRANCE	LITHOS	PIN, C.; MARINI, F.		44.55	3.28	0.01	472	480	488	XRF	METAMORPHIC	UNKNOWN	UNKNOWN	GNEISS
LAM 3		GEOROC	10.1016/0024-4937(93)90016-6	EARLY ORDOVICIAN CONTINENTAL BREAK-UP IN VARISCAN EUROPE: ND-SR ISOTOPE AND TRACE ELEMENT EVIDENCE FROM BIMODAL IGNEOUS ASSOCIATIONS OF THE SOUTHERN MASSIF CENTRAL, FRANCE	LITHOS	PIN, C.; MARINI, F.		44.55	3.28	0.01	472	480	488	TIMS_ID	METAMORPHIC	UNKNOWN	UNKNOWN	GNEISS
LAM 3		GEOROC	10.1016/0024-4937(93)90016-6	EARLY ORDOVICIAN CONTINENTAL BREAK-UP IN VARISCAN EUROPE: ND-SR ISOTOPE AND TRACE ELEMENT EVIDENCE FROM BIMODAL IGNEOUS ASSOCIATIONS OF THE SOUTHERN MASSIF CENTRAL, FRANCE	LITHOS	PIN, C.; MARINI, F.		44.55	3.28	0.01	472	480	488	TIMS	METAMORPHIC	UNKNOWN	UNKNOWN	GNEISS
LAM 3		GEOROC	10.1016/0024-4937(93)90016-6	EARLY ORDOVICIAN CONTINENTAL BREAK-UP IN VARISCAN EUROPE: ND-SR ISOTOPE AND TRACE ELEMENT EVIDENCE FROM BIMODAL IGNEOUS ASSOCIATIONS OF THE SOUTHERN MASSIF CENTRAL, FRANCE	LITHOS	PIN, C.; MARINI, F.		44.55	3.28	0.01	472	480	488	IGN	METAMORPHIC	UNKNOWN	UNKNOWN	GNEISS														0.26
LAM 3		GEOROC	10.1016/0024-4937(93)90016-6	EARLY ORDOVICIAN CONTINENTAL BREAK-UP IN VARISCAN EUROPE: ND-SR ISOTOPE AND TRACE ELEMENT EVIDENCE FROM BIMODAL IGNEOUS ASSOCIATIONS OF THE SOUTHERN MASSIF CENTRAL, FRANCE	LITHOS	PIN, C.; MARINI, F.		44.55	3.28	0.01	472	480	488	ICPAES	METAMORPHIC	UNKNOWN	UNKNOWN	GNEISS																			39.9		88.7		26.4	4.09	0.85	4.45		3.14		1.95
LAM 3		GEOROC	10.1016/0024-4937(93)90016-6	EARLY ORDOVICIAN CONTINENTAL BREAK-UP IN VARISCAN EUROPE: ND-SR ISOTOPE AND TRACE ELEMENT EVIDENCE FROM BIMODAL IGNEOUS ASSOCIATIONS OF THE SOUTHERN MASSIF CENTRAL, FRANCE	LITHOS	PIN, C.; MARINI, F.		44.55	3.28	0.01	472	480	488	AAS	METAMORPHIC	UNKNOWN	UNKNOWN	GNEISS	76.1	0.2	12.5	1.03		0.87		0.25	1.2	2.2	6		0.03
PC-422		GEOROC	10.1093/petrology/egr014	IMPLICATIONS OF THE NUVVUAGITTUQ GREENSTONE BELT FOR THE FORMATION OF EARTHS EARLY CRUST	J. PETROL.	O^NEIL, J.; FRANCIS, D. M.; CARLSON, R. W.		58	-77	0.01				XRF	METAMORPHIC	UNKNOWN	UNKNOWN	GNEISS	54.24	0.625	14.46				10.3568	9.45	4.38	2.57	0.97	0.065	0.165
PC-422		GEOROC	10.1093/petrology/egr014	IMPLICATIONS OF THE NUVVUAGITTUQ GREENSTONE BELT FOR THE FORMATION OF EARTHS EARLY CRUST	J. PETROL.	O^NEIL, J.; FRANCIS, D. M.; CARLSON, R. W.		58	-77	0.01				IGN	METAMORPHIC	UNKNOWN	UNKNOWN	GNEISS														1.84
CHT6		GEOROC	10.1016/j.precamres.2006.05.006	ISOTOPIC AND GEOCHEMICAL EVIDENCE OF PROTEROZOIC EPISODIC CRUSTAL REWORKING WITHIN THE IRUMIDE BELT OF SOUTH-CENTRAL AFRICA, THE SOUTHERN METACRATONIC BOUNDARY OF AN ARCHAEAN BANGWEULU CRATON	PREC. RESEARCH	DE WAELE, B.; LIEGEOIS, J.-P.; NEMCHIN, A. A.; TEMBO, F.		-11	27	0.01	542	1521	2500	IGN	METAMORPHIC	UNKNOWN	UNKNOWN	GNEISS														0.02
CHT6		GEOROC	10.1016/j.precamres.2006.05.006	ISOTOPIC AND GEOCHEMICAL EVIDENCE OF PROTEROZOIC EPISODIC CRUSTAL REWORKING WITHIN THE IRUMIDE BELT OF SOUTH-CENTRAL AFRICA, THE SOUTHERN METACRATONIC BOUNDARY OF AN ARCHAEAN BANGWEULU CRATON	PREC. RESEARCH	DE WAELE, B.; LIEGEOIS, J.-P.; NEMCHIN, A. A.; TEMBO, F.		-11	27	0.01	542	1521	2500	ICPOES	METAMORPHIC	UNKNOWN	UNKNOWN	GNEISS	73	0.84	12.7		5.2			0.69	1.77	2.61	3.64	0.18
CHT6		GEOROC	10.1016/j.precamres.2006.05.006	ISOTOPIC AND GEOCHEMICAL EVIDENCE OF PROTEROZOIC EPISODIC CRUSTAL REWORKING WITHIN THE IRUMIDE BELT OF SOUTH-CENTRAL AFRICA, THE SOUTHERN METACRATONIC BOUNDARY OF AN ARCHAEAN BANGWEULU CRATON	PREC. RESEARCH	DE WAELE, B.; LIEGEOIS, J.-P.; NEMCHIN, A. A.; TEMBO, F.		-11	27	0.01	542	1521	2500	ICPMS	METAMORPHIC	UNKNOWN	UNKNOWN	GNEISS																			57		121	13.3	51.3	12.6	1.93	10.7	2.11	10.9	1.89	5.24	0.89
PC-123		GEOROC	10.1093/petrology/egr014	IMPLICATIONS OF THE NUVVUAGITTUQ GREENSTONE BELT FOR THE FORMATION OF EARTHS EARLY CRUST	J. PETROL.	O^NEIL, J.; FRANCIS, D. M.; CARLSON, R. W.		58	-77	0.01				XRF	METAMORPHIC	UNKNOWN	UNKNOWN	GNEISS	50.09	0.369	17.41				8.9801	10.03	4.1	2.08	3.15	0.037	0.198
PC-123		GEOROC	10.1093/petrology/egr014	IMPLICATIONS OF THE NUVVUAGITTUQ GREENSTONE BELT FOR THE FORMATION OF EARTHS EARLY CRUST	J. PETROL.	O^NEIL, J.; FRANCIS, D. M.; CARLSON, R. W.		58	-77	0.01				IGN	METAMORPHIC	UNKNOWN	UNKNOWN	GNEISS														3.06
GH23		GEOROC	10.1016/j.precamres.2004.12.002	THE EGLAB MASSIF IN THE WEST AFRICAN CRATON (ALGERIA), AN ORIGINAL SEGMENT OF THE EBURNEAN OROGENIC BELT: PETROLOGY, GEOCHEMISTRY AND GEOCHRONOLOGY	PREC. RESEARCH	PEUCAT, J. J.; CAPDEVILA, R.; DRARENI, A.; MAHDJOUB, Y.; KAHOUI, M.		26	-3	0.01	2500	3175	3850	TIMS_ID	METAMORPHIC	UNKNOWN	UNKNOWN	GNEISS																							20.21	6.59
GH23		GEOROC	10.1016/j.precamres.2004.12.002	THE EGLAB MASSIF IN THE WEST AFRICAN CRATON (ALGERIA), AN ORIGINAL SEGMENT OF THE EBURNEAN OROGENIC BELT: PETROLOGY, GEOCHEMISTRY AND GEOCHRONOLOGY	PREC. RESEARCH	PEUCAT, J. J.; CAPDEVILA, R.; DRARENI, A.; MAHDJOUB, Y.; KAHOUI, M.		26	-3	0.01	2500	3175	3850	TIMS	METAMORPHIC	UNKNOWN	UNKNOWN	GNEISS
GH23		GEOROC	10.1016/j.precamres.2004.12.002	THE EGLAB MASSIF IN THE WEST AFRICAN CRATON (ALGERIA), AN ORIGINAL SEGMENT OF THE EBURNEAN OROGENIC BELT: PETROLOGY, GEOCHEMISTRY AND GEOCHRONOLOGY	PREC. RESEARCH	PEUCAT, J. J.; CAPDEVILA, R.; DRARENI, A.; MAHDJOUB, Y.; KAHOUI, M.		26	-3	0.01	2500	3175	3850	IGN	METAMORPHIC	UNKNOWN	UNKNOWN	GNEISS														1.12
GH23		GEOROC	10.1016/j.precamres.2004.12.002	THE EGLAB MASSIF IN THE WEST AFRICAN CRATON (ALGERIA), AN ORIGINAL SEGMENT OF THE EBURNEAN OROGENIC BELT: PETROLOGY, GEOCHEMISTRY AND GEOCHRONOLOGY	PREC. RESEARCH	PEUCAT, J. J.; CAPDEVILA, R.; DRARENI, A.; MAHDJOUB, Y.; KAHOUI, M.		26	-3	0.01	2500	3175	3850	ICPMS	METAMORPHIC	UNKNOWN	UNKNOWN	GNEISS																			9.84		27.61	3.85	18.7	6.8	1.89	7.05	1.66	10.29	2.54	7.42	1.18
GH23		GEOROC	10.1016/j.precamres.2004.12.002	THE EGLAB MASSIF IN THE WEST AFRICAN CRATON (ALGERIA), AN ORIGINAL SEGMENT OF THE EBURNEAN OROGENIC BELT: PETROLOGY, GEOCHEMISTRY AND GEOCHRONOLOGY	PREC. RESEARCH	PEUCAT, J. J.; CAPDEVILA, R.; DRARENI, A.; MAHDJOUB, Y.; KAHOUI, M.		26	-3	0.01	2500	3175	3850	ICPAES	METAMORPHIC	UNKNOWN	UNKNOWN	GNEISS	70.09	0.45	11.58		8.09			0.68	3.3	3.54	0.2	0.11	0.17
ET3		GEOROC	10.1016/S0899-5362(98)00006-2	GEOCHEMISTRY, PB-PB SINGLE ZIRCON AGES AND ND-SR ISOTOPE COMPOSITION OF PRECAMBRIAN ROCKS FROM SOUTHERN AND EASTERN ETHIOPIA: IMPLICATIONS FOR CRUSTAL EVOLUTION IN EAST AFRICA	J. AFR. EARTH SCI.	TEKLAY, M.; KRÖNER, A.; MEZGER, J. E.; OBERHÄNSLI, R. E.		9	42	0.01				XRF	METAMORPHIC	UNKNOWN	UNKNOWN	GNEISS	75.14	0.16	12.14	0.48				0.28	0.88	3.45	5.08	0	0.04
ET3		GEOROC	10.1016/S0899-5362(98)00006-2	GEOCHEMISTRY, PB-PB SINGLE ZIRCON AGES AND ND-SR ISOTOPE COMPOSITION OF PRECAMBRIAN ROCKS FROM SOUTHERN AND EASTERN ETHIOPIA: IMPLICATIONS FOR CRUSTAL EVOLUTION IN EAST AFRICA	J. AFR. EARTH SCI.	TEKLAY, M.; KRÖNER, A.; MEZGER, J. E.; OBERHÄNSLI, R. E.		9	42	0.01				TIT	METAMORPHIC	UNKNOWN	UNKNOWN	GNEISS						0.7
ET3		GEOROC	10.1016/S0899-5362(98)00006-2	GEOCHEMISTRY, PB-PB SINGLE ZIRCON AGES AND ND-SR ISOTOPE COMPOSITION OF PRECAMBRIAN ROCKS FROM SOUTHERN AND EASTERN ETHIOPIA: IMPLICATIONS FOR CRUSTAL EVOLUTION IN EAST AFRICA	J. AFR. EARTH SCI.	TEKLAY, M.; KRÖNER, A.; MEZGER, J. E.; OBERHÄNSLI, R. E.		9	42	0.01				IGN	METAMORPHIC	UNKNOWN	UNKNOWN	GNEISS														0.43
MG2		GEOROC	10.1016/S0899-5362(00)80009-3	PALAEO- AND NEOPROTEROZOIC GRANITOIDS AND RHYOLITES FROM THE WEST CONGOLIAN BELT (GABON, CONGO, CABINDA, NORTH ANGOLA): CHEMICAL COMPOSITION AND GEOTECTONIC IMPLICATIONS	J. AFR. EARTH SCI.	VICAT, J.-P.; POUCLET, A.		-4.4	12.25	0.01	542	1521	2500	NOT GIVEN	METAMORPHIC	UNKNOWN	UNKNOWN	GNEISS	59.18	1	16.52		6.81			2.96	4.36	3.55	2.89	0.3	0.09						66.3		111.1		43.2	6.1	1.8	5.3		2.6		1.2
MG2		GEOROC	10.1016/S0899-5362(00)80009-3	PALAEO- AND NEOPROTEROZOIC GRANITOIDS AND RHYOLITES FROM THE WEST CONGOLIAN BELT (GABON, CONGO, CABINDA, NORTH ANGOLA): CHEMICAL COMPOSITION AND GEOTECTONIC IMPLICATIONS	J. AFR. EARTH SCI.	VICAT, J.-P.; POUCLET, A.		-4.4	12.25	0.01	542	1521	2500	IGN	METAMORPHIC	UNKNOWN	UNKNOWN	GNEISS														1.68
477608		GEOROC	10.1016/j.chemgeo.2013.07.001	MESOARCHAEAN ALUMINOUS ROCKS AT STORO, SOUTHERN WEST GREENLAND: NEW AGE DATA AND EVIDENCE OF PREMETAMORPHIC SEAFLOOR WEATHERING OF BASALTS	CHEM. GEOL.	SZILAS, K.; GARDE, A. A.		64.4037	-51.0938	0.01				XRF	METAMORPHIC	UNKNOWN	UNKNOWN	GNEISS	48.873	2.399	19.865	2.577		10.68		2.965	4.933	2.1	2.501	0.19	0.229
477608		GEOROC	10.1016/j.chemgeo.2013.07.001	MESOARCHAEAN ALUMINOUS ROCKS AT STORO, SOUTHERN WEST GREENLAND: NEW AGE DATA AND EVIDENCE OF PREMETAMORPHIC SEAFLOOR WEATHERING OF BASALTS	CHEM. GEOL.	SZILAS, K.; GARDE, A. A.		64.4037	-51.0938	0.01				IGN	METAMORPHIC	UNKNOWN	UNKNOWN	GNEISS														1.839
477608		GEOROC	10.1016/j.chemgeo.2013.07.001	MESOARCHAEAN ALUMINOUS ROCKS AT STORO, SOUTHERN WEST GREENLAND: NEW AGE DATA AND EVIDENCE OF PREMETAMORPHIC SEAFLOOR WEATHERING OF BASALTS	CHEM. GEOL.	SZILAS, K.; GARDE, A. A.		64.4037	-51.0938	0.01				ICPMS	METAMORPHIC	UNKNOWN	UNKNOWN	GNEISS																			9.8848		22.8021	3.07177	13.3305	3.76943	1.40848	4.57136	1.01921	7.13349	1.64449	4.39188	0.750101
HP-5		GEOROC	10.1016/S0012-821X(97)00091-5	GEOCHRONOLOGY AND ND ISOTOPIC DATA OF GRENVILLE-AGE ROCKS IN THE COLOMBIAN ANDES: NEW CONSTRAINTS FOR LATE PROTEROZOIC-EARLY PALEOZOIC PALEOCONTINENTAL RECONSTRUCTIONS OF THE AMERICAS	EARTH PLANET. SCI. LETT.	RESTREPO-PACE, P. A.; RUIZ, J.; GEHRELS, G. E.; COSCA, M. A.		2	-75	0.01				NOT GIVEN	METAMORPHIC	UNKNOWN	UNKNOWN	GNEISS																							1.587	0.18
PC-247		GEOROC	10.1093/petrology/egr014	IMPLICATIONS OF THE NUVVUAGITTUQ GREENSTONE BELT FOR THE FORMATION OF EARTHS EARLY CRUST	J. PETROL.	O^NEIL, J.; FRANCIS, D. M.; CARLSON, R. W.		58	-77	0.01				XRF	METAMORPHIC	UNKNOWN	UNKNOWN	GNEISS	56.24	0.668	18.37				12.8943	4.63	0.36	0.12	3.16	0.063	0.136
PC-247		GEOROC	10.1093/petrology/egr014	IMPLICATIONS OF THE NUVVUAGITTUQ GREENSTONE BELT FOR THE FORMATION OF EARTHS EARLY CRUST	J. PETROL.	O^NEIL, J.; FRANCIS, D. M.; CARLSON, R. W.		58	-77	0.01				IGN	METAMORPHIC	UNKNOWN	UNKNOWN	GNEISS														2.69
IBG491		GEOROC	10.2113/gssajg.115.1.1	RB-SR WHOLE-ROCK AGE OF PERALKALINE ACIDIC VOLCANICS IN THE MACEDO DE CAVALEIROS AREA, TRÁS-OS-MONTES (NE PORTUGAL)	COMUNICACOES SERV. GEOL. PORTUGAL	RIBEIRO, M. L.; PRIEM, H. N. A.; BOELRIJK, N. A. I. M.; SCHERMERHORN, L. J. G.		41.53	-6.95	0.01	473	473	473	XRF	METAMORPHIC	UNKNOWN	UNKNOWN	GNEISS
IBG491		GEOROC	10.2113/gssajg.115.1.1	RB-SR WHOLE-ROCK AGE OF PERALKALINE ACIDIC VOLCANICS IN THE MACEDO DE CAVALEIROS AREA, TRÁS-OS-MONTES (NE PORTUGAL)	COMUNICACOES SERV. GEOL. PORTUGAL	RIBEIRO, M. L.; PRIEM, H. N. A.; BOELRIJK, N. A. I. M.; SCHERMERHORN, L. J. G.		41.53	-6.95	0.01	473	473	473	TIMS	METAMORPHIC	UNKNOWN	UNKNOWN	GNEISS
SD 75		GEOROC	10.1007/s007100200004	SOURCE CONTAMINATION AND MANTLE HETEROGENEITY IN THE GENESIS OF ITALIAN POTASSIC AND ULTRAPOTASSIC VOLCANIC ROCKS: SR-ND-PB ISOTOPE DATA FROM ROMAN PROVINCE AND SOUTHERN TUSCANY	MINERAL. PETROL.	CONTICELLI, S.; D^ANTONIO, M.; PINARELLI, L.; CIVETTA, L.		42.75	11.95	0.01				TIMS	METAMORPHIC	UNKNOWN	UNKNOWN	GNEISS
SD 75		GEOROC	10.1007/s007100200004	SOURCE CONTAMINATION AND MANTLE HETEROGENEITY IN THE GENESIS OF ITALIAN POTASSIC AND ULTRAPOTASSIC VOLCANIC ROCKS: SR-ND-PB ISOTOPE DATA FROM ROMAN PROVINCE AND SOUTHERN TUSCANY	MINERAL. PETROL.	CONTICELLI, S.; D^ANTONIO, M.; PINARELLI, L.; CIVETTA, L.		42.75	11.95	0.01				TIMS_ID	METAMORPHIC	UNKNOWN	UNKNOWN	GNEISS
SD 75		GEOROC	10.1007/s007100200004	SOURCE CONTAMINATION AND MANTLE HETEROGENEITY IN THE GENESIS OF ITALIAN POTASSIC AND ULTRAPOTASSIC VOLCANIC ROCKS: SR-ND-PB ISOTOPE DATA FROM ROMAN PROVINCE AND SOUTHERN TUSCANY	MINERAL. PETROL.	CONTICELLI, S.; D^ANTONIO, M.; PINARELLI, L.; CIVETTA, L.		42.75	11.95	0.01				TIMS	METAMORPHIC	UNKNOWN	UNKNOWN	GNEISS
SD 75		GEOROC	10.1016/j.lithos.2008.07.016	TRACE ELEMENTS AND SR-ND-PB ISOTOPES OF K-RICH, SHOSHONITIC, AND CALC-ALKALINE MAGMATISM OF THE WESTERN MEDITERRANEAN REGION: GENESIS OF ULTRAPOTASSIC TO CALC-ALKALINE MAGMATIC ASSOCIATIONS IN A POST-COLLISIONAL GEODYNAMIC SETTING	LITHOS	CONTICELLI, S.; GUARNIERI, L.; FARINELLI, A.; MATTEI, M.; AVANZINELLI, R.; BIANCHINI, G.; BOARI, E.; TOMMASINI, S.; TIEPOLO, M.; PRELEVIC, D.; VENTURELLI, G.		42.75	11.95	0.01				TIMS	METAMORPHIC	UNKNOWN	UNKNOWN	GNEISS
SD 75		GEOROC	10.1016/j.lithos.2008.07.016	TRACE ELEMENTS AND SR-ND-PB ISOTOPES OF K-RICH, SHOSHONITIC, AND CALC-ALKALINE MAGMATISM OF THE WESTERN MEDITERRANEAN REGION: GENESIS OF ULTRAPOTASSIC TO CALC-ALKALINE MAGMATIC ASSOCIATIONS IN A POST-COLLISIONAL GEODYNAMIC SETTING	LITHOS	CONTICELLI, S.; GUARNIERI, L.; FARINELLI, A.; MATTEI, M.; AVANZINELLI, R.; BIANCHINI, G.; BOARI, E.; TOMMASINI, S.; TIEPOLO, M.; PRELEVIC, D.; VENTURELLI, G.		42.75	11.95	0.01				ICPMS_LA	METAMORPHIC	UNKNOWN	UNKNOWN	GNEISS																			41.3		80		37	7.2	1.25		0.9
K-94-7A		GEOROC	10.1016/S0040-1951(00)00060-3	ND ISOTOPIC EVIDENCE FOR EARLY TO LATE ARCHEAN (3.4-2.7 GA) CRUSTAL GROWTH IN THE WESTERN SUPERIOR PROVINCE (ONTARIO, CANADA)	TECTONOPHYSICS	HENRY, P.; STEVENSON, R. K.; LARBI, Y.; GARIEPY, C.		49.77	-94.47	0.01	2875	2875	2875	TIMS_ID	METAMORPHIC	UNKNOWN	UNKNOWN	GNEISS																							3.03	0.53
K-94-7A		GEOROC	10.1016/S0040-1951(00)00060-3	ND ISOTOPIC EVIDENCE FOR EARLY TO LATE ARCHEAN (3.4-2.7 GA) CRUSTAL GROWTH IN THE WESTERN SUPERIOR PROVINCE (ONTARIO, CANADA)	TECTONOPHYSICS	HENRY, P.; STEVENSON, R. K.; LARBI, Y.; GARIEPY, C.		49.77	-94.47	0.01	2875	2875	2875	TIMS	METAMORPHIC	UNKNOWN	UNKNOWN	GNEISS
CC10		GEOROC	10.1016/j.precamres.2006.05.006	ISOTOPIC AND GEOCHEMICAL EVIDENCE OF PROTEROZOIC EPISODIC CRUSTAL REWORKING WITHIN THE IRUMIDE BELT OF SOUTH-CENTRAL AFRICA, THE SOUTHERN METACRATONIC BOUNDARY OF AN ARCHAEAN BANGWEULU CRATON	PREC. RESEARCH	DE WAELE, B.; LIEGEOIS, J.-P.; NEMCHIN, A. A.; TEMBO, F.		-11	27	0.01	542	1521	2500	IGN	METAMORPHIC	UNKNOWN	UNKNOWN	GNEISS														0.01
CC10		GEOROC	10.1016/j.precamres.2006.05.006	ISOTOPIC AND GEOCHEMICAL EVIDENCE OF PROTEROZOIC EPISODIC CRUSTAL REWORKING WITHIN THE IRUMIDE BELT OF SOUTH-CENTRAL AFRICA, THE SOUTHERN METACRATONIC BOUNDARY OF AN ARCHAEAN BANGWEULU CRATON	PREC. RESEARCH	DE WAELE, B.; LIEGEOIS, J.-P.; NEMCHIN, A. A.; TEMBO, F.		-11	27	0.01	542	1521	2500	ICPOES	METAMORPHIC	UNKNOWN	UNKNOWN	GNEISS	74	0.33	13.8		2.31			0.43	1.51	2.97	4.04	0.05
CC10		GEOROC	10.1016/j.precamres.2006.05.006	ISOTOPIC AND GEOCHEMICAL EVIDENCE OF PROTEROZOIC EPISODIC CRUSTAL REWORKING WITHIN THE IRUMIDE BELT OF SOUTH-CENTRAL AFRICA, THE SOUTHERN METACRATONIC BOUNDARY OF AN ARCHAEAN BANGWEULU CRATON	PREC. RESEARCH	DE WAELE, B.; LIEGEOIS, J.-P.; NEMCHIN, A. A.; TEMBO, F.		-11	27	0.01	542	1521	2500	ICPMS	METAMORPHIC	UNKNOWN	UNKNOWN	GNEISS																			91.5		157	16.2	56.7	9.66	1.62	6.92	1.3	5.39	0.84	2.44	0.35
RT-95A		GEOROC	10.1086/314337	U-PB GEOCHRONOLOGY AND ISOTOPE GEOCHEMISTRY OF THE ARCHEAN AND PROTEROZOIC ROCKS OF NORTH-CENTRAL MADAGASCAR	J. GEOL.	TUCKER, R. D.; ASHWAL, L. D.; HANDKE, M. J.; LE GRANGE, M.; HAMILTON, M. A.; RAMBELOSON, R. A.		-19	49	0.01	542	1521	2500	TIMS_ID	METAMORPHIC	UNKNOWN	UNKNOWN	GNEISS																							76.59	11.34
RT-95A		GEOROC	10.1086/314337	U-PB GEOCHRONOLOGY AND ISOTOPE GEOCHEMISTRY OF THE ARCHEAN AND PROTEROZOIC ROCKS OF NORTH-CENTRAL MADAGASCAR	J. GEOL.	TUCKER, R. D.; ASHWAL, L. D.; HANDKE, M. J.; LE GRANGE, M.; HAMILTON, M. A.; RAMBELOSON, R. A.		-19	49	0.01	542	1521	2500	TIMS	METAMORPHIC	UNKNOWN	UNKNOWN	GNEISS
RT-10H-2B		GEOROC	10.1016/j.gexplo.2013.06.012	PRELIMINARY RADIOGENIC ISOTOPE STUDY ON THE ORIGIN OF THE KHANNESHIN CARBONATITE COMPLEX, HELMAND PROVINCE, AFGHANISTAN	J. GEOCHEM. EXPLORATION	AYUSO, R. A.; TUCKER, R. D.; PETERS, S.; FOLEY, N. K.; JACKSON, J.; ROBINSON, S.; BOVE, M.		30.55	63.79	0.01				TIMS_ID	METAMORPHIC	UNKNOWN	UNKNOWN	GNEISS																							1.71	0.27
RT-10H-2B		GEOROC	10.1016/j.gexplo.2013.06.012	PRELIMINARY RADIOGENIC ISOTOPE STUDY ON THE ORIGIN OF THE KHANNESHIN CARBONATITE COMPLEX, HELMAND PROVINCE, AFGHANISTAN	J. GEOCHEM. EXPLORATION	AYUSO, R. A.; TUCKER, R. D.; PETERS, S.; FOLEY, N. K.; JACKSON, J.; ROBINSON, S.; BOVE, M.		30.55	63.79	0.01				TIMS	METAMORPHIC	UNKNOWN	UNKNOWN	GNEISS
PC-281		GEOROC	10.1093/petrology/egr014	IMPLICATIONS OF THE NUVVUAGITTUQ GREENSTONE BELT FOR THE FORMATION OF EARTHS EARLY CRUST	J. PETROL.	O^NEIL, J.; FRANCIS, D. M.; CARLSON, R. W.		58	-77	0.01				XRF	METAMORPHIC	UNKNOWN	UNKNOWN	GNEISS	54.17	0.586	17.59				13.3622	4.31	1.42	0.13	4.05	0.072	0.367
PC-281		GEOROC	10.1093/petrology/egr014	IMPLICATIONS OF THE NUVVUAGITTUQ GREENSTONE BELT FOR THE FORMATION OF EARTHS EARLY CRUST	J. PETROL.	O^NEIL, J.; FRANCIS, D. M.; CARLSON, R. W.		58	-77	0.01				IGN	METAMORPHIC	UNKNOWN	UNKNOWN	GNEISS														3.22
MAZ-17A		GEOROC	10.1016/S0024-4937(99)00003-1	SR AND O ISOTOPE CONSTRAINTS ON SOURCE AND CRUSTAL CONTAMINATION IN THE HIGH-K CALC-ALKALINE AND SHOSHONITIC NEOGENE VOLCANIC ROCKS OF SE SPAIN	LITHOS	BENITO GARCIA, R.; LOPEZ RUIZ, J.; CEBRIA, J.-M.; HERTOGEN, J.; DOBLAS, M.; OYARZUN, R.; DEMAIFFE, D.		37.6	-1.32	0.01	5	11	17	XRF	METAMORPHIC	UNKNOWN	UNKNOWN	GNEISS	46.41	1.41	31.89		9.22			2.86	3.29	1.8	1.66	0.16	0.2
MAZ-17A		GEOROC	10.1016/S0024-4937(99)00003-1	SR AND O ISOTOPE CONSTRAINTS ON SOURCE AND CRUSTAL CONTAMINATION IN THE HIGH-K CALC-ALKALINE AND SHOSHONITIC NEOGENE VOLCANIC ROCKS OF SE SPAIN	LITHOS	BENITO GARCIA, R.; LOPEZ RUIZ, J.; CEBRIA, J.-M.; HERTOGEN, J.; DOBLAS, M.; OYARZUN, R.; DEMAIFFE, D.		37.6	-1.32	0.01	5	11	17	INAA	METAMORPHIC	UNKNOWN	UNKNOWN	GNEISS																			75.4		155		67	13.2	2.92		1.44
MAZ-17A		GEOROC	10.1016/S0024-4937(99)00003-1	SR AND O ISOTOPE CONSTRAINTS ON SOURCE AND CRUSTAL CONTAMINATION IN THE HIGH-K CALC-ALKALINE AND SHOSHONITIC NEOGENE VOLCANIC ROCKS OF SE SPAIN	LITHOS	BENITO GARCIA, R.; LOPEZ RUIZ, J.; CEBRIA, J.-M.; HERTOGEN, J.; DOBLAS, M.; OYARZUN, R.; DEMAIFFE, D.		37.6	-1.32	0.01	5	11	17	IGN	METAMORPHIC	UNKNOWN	UNKNOWN	GNEISS														0.96
8		GEOROC	10.1093/petrology/41.7.967	THE NATURE AND SIGNIFICANCE OF PRE-YELLOWKNIFE SUPERGROUP ROCKS IN THE POINT LAKE AREA, SLAVE STRUCTURAL PROVINCE, CANADA	SPEC. PAP. GEOL. ASSOC. CAN.	EASTON, R. M.		65.17	-113	0.01	2500	3175	3850	NOT GIVEN	METAMORPHIC	UNKNOWN	UNKNOWN	GNEISS																			25.3		56.5	4.1	20.3	4.3	1.3	4.5		3.3		1.7
780209		GEOROC	10.1016/0301-9268(84)90050-0	PETROGRAPHY, CHEMISTRY AND ISOTOPIC AGES OF PENINSULAR GNEISS, DHARWAR ACID VOLCANIC ROCKS AND THE CHITRADURGA GRANITE WITH SPECIAL REFERENCE TO THE LATE ARCHAEAN EVOLUTION OF THE KARNATAKA CRATON, SOUTHERN INDIA	PREC. RESEARCH	TAYLOR, P. N.; CHADWICK, B.; MOORBATH, S.; RAMAKRISHNAN, M.; VISWANATHA, M. N.		16.27	77.25	0.01	2500	3175	3850	XRF	METAMORPHIC	UNKNOWN	UNKNOWN	GNEISS
780209		GEOROC	10.1016/0301-9268(84)90050-0	PETROGRAPHY, CHEMISTRY AND ISOTOPIC AGES OF PENINSULAR GNEISS, DHARWAR ACID VOLCANIC ROCKS AND THE CHITRADURGA GRANITE WITH SPECIAL REFERENCE TO THE LATE ARCHAEAN EVOLUTION OF THE KARNATAKA CRATON, SOUTHERN INDIA	PREC. RESEARCH	TAYLOR, P. N.; CHADWICK, B.; MOORBATH, S.; RAMAKRISHNAN, M.; VISWANATHA, M. N.		16.27	77.25	0.01	2500	3175	3850	TIMS	METAMORPHIC	UNKNOWN	UNKNOWN	GNEISS
L3		GEOROC	10.1007/BF00375426	GEOCHEMISTRY AND PETROGENESIS OF TERTIARY GRANITIC ROCKS FROM THE ISLAND OF MULL, NORTHWEST SCOTLAND	CONTRIB. MINERAL. PETROL.	WALSH, J. N.; BECKINSALE, R. D.; SKELHORN, R. R.; THORPE, R. S.		56.25	-6.4	0.01	2500	3175	3850	INAA	METAMORPHIC	UNKNOWN	UNKNOWN	GNEISS																			18.4		33.6		14.5	2.5	1.06	1.8	0.22
339644		GEOROC	10.1007/s00445-009-0278-6	ACCRETION AND EVOLUTION OF AN ARCHEAN HIGH-GRADE GREY GNEISS-AMPHIBOLITE COMPLEX: THE FISKEFJORD AREA, SOUTHERN WEST GREENLAND	BULL. GEOL. GREENLAND SURV.	GARDE, A. A.		65	-52	0.01	2500	3175	3850	XRF	METAMORPHIC	UNKNOWN	UNKNOWN	GNEISS
339644		GEOROC	10.1007/s00445-009-0278-6	ACCRETION AND EVOLUTION OF AN ARCHEAN HIGH-GRADE GREY GNEISS-AMPHIBOLITE COMPLEX: THE FISKEFJORD AREA, SOUTHERN WEST GREENLAND	BULL. GEOL. GREENLAND SURV.	GARDE, A. A.		65	-52	0.01	2500	3175	3850	TIMS	METAMORPHIC	UNKNOWN	UNKNOWN	GNEISS
06 FF-1		GEOROC	10.1016/S1342-937X(05)70340-3	RB-SR AND SM-ND GEOCHRONOLOGY OF THE EPPAWALA METAMORPHIC ROCKS AND CARBONATITE, WANNI COMPLEX, SRI LANKA	GONDWANA RES.	WEERAKOON, M. W. T.; MIYAZAKI, T.; SHUTO, K.; KAGAMI, H.		8.167	80.4	0.01	542	1521	2500	TIMS_ID	METAMORPHIC	UNKNOWN	UNKNOWN	GNEISS																							150.6	23.53
06 FF-1		GEOROC	10.1016/S1342-937X(05)70340-3	RB-SR AND SM-ND GEOCHRONOLOGY OF THE EPPAWALA METAMORPHIC ROCKS AND CARBONATITE, WANNI COMPLEX, SRI LANKA	GONDWANA RES.	WEERAKOON, M. W. T.; MIYAZAKI, T.; SHUTO, K.; KAGAMI, H.		8.167	80.4	0.01	542	1521	2500	TIMS	METAMORPHIC	UNKNOWN	UNKNOWN	GNEISS
1420		GEOROC	10.1080/08120099408728142	GEOLOGY OF CARBONATITE- ALKALIC ROCK COMPLEXES IN ONTARIO	ONTARIO GEOL. SURV. STUDY	SAGE, R. P.		47.92	-83.25	0.01	542	1521	2500	NOT GIVEN	METAMORPHIC	UNKNOWN	UNKNOWN	GNEISS	49.9	0.89	13.1	2.68		5.49		6.73	5.94	6.43	2.98	0.38	0.17		0.42	0.31			0		80		50
041101_M		GEOROC	10.1130/B26538.1	GEOCHEMICAL VARIATIONS IN IGNEOUS ROCKS OF THE CENTRAL ANDEAN OROCLINE (13°S TO 18°S): TRACING CRUSTAL THICKENING AND MAGMA GENERATION THROUGH TIME AND SPACE	BULL. GEOL. SOC. AM.	MAMANI, M.; WÖRNER, G.; SEMPERE, T.		-17.0381	-71.9971	0.01	542	1521	2500	XRF	METAMORPHIC	UNKNOWN	UNKNOWN	GNEISS	62.58	0.988	17.25		9.17			2.49	0.5	0.82	2.54	0.027	0.085
041101_M		GEOROC	10.1130/B26538.1	GEOCHEMICAL VARIATIONS IN IGNEOUS ROCKS OF THE CENTRAL ANDEAN OROCLINE (13°S TO 18°S): TRACING CRUSTAL THICKENING AND MAGMA GENERATION THROUGH TIME AND SPACE	BULL. GEOL. SOC. AM.	MAMANI, M.; WÖRNER, G.; SEMPERE, T.		-17.0381	-71.9971	0.01	542	1521	2500	ICPMS	METAMORPHIC	UNKNOWN	UNKNOWN	GNEISS																			30.3054		63.1002	7.08152	25.9319	4.26701	1.02816	3.60005	0.45388	2.38322	0.431011	1.33123	0.16905
MILT-7		GEOROC	10.1086/314411	U-PB GEOCHRONOLOGIC, ND ISOTOPIC, AND GEOCHEMICAL EVIDENCE FOR THE CORRELATION OF THE CHOPAWAMSIC AND MILTON TERRANES, PIEDMONT ZONE, SOUTHERN APPALACHIAN OROGEN	J. GEOL.	COLER, D. G.; WORTMAN, G. L.; SAMSON, S. D.; HIBBARD, J. P.; STERN, RICHARD		36.6	-78.3	0.01	444	466	488	TIMS_ID	METAMORPHIC	UNKNOWN	UNKNOWN	GNEISS																							18.5	4.79
MILT-7		GEOROC	10.1086/314411	U-PB GEOCHRONOLOGIC, ND ISOTOPIC, AND GEOCHEMICAL EVIDENCE FOR THE CORRELATION OF THE CHOPAWAMSIC AND MILTON TERRANES, PIEDMONT ZONE, SOUTHERN APPALACHIAN OROGEN	J. GEOL.	COLER, D. G.; WORTMAN, G. L.; SAMSON, S. D.; HIBBARD, J. P.; STERN, RICHARD		36.6	-78.3	0.01	444	466	488	TIMS	METAMORPHIC	UNKNOWN	UNKNOWN	GNEISS
BAR37		GEOROC	10.1126/science.210.4475.1245	ORIGIN OF LEAD IN ANDEAN CALC-ALKALINE LAVAS, SOUTHERN PERU	SCIENCE	TILTON, G. R.; BAREIRO, B.		-17.15	-69.85	0.01				TIMS_ID	METAMORPHIC	UNKNOWN	UNKNOWN	GNEISS
BAR37		GEOROC	10.1126/science.210.4475.1245	ORIGIN OF LEAD IN ANDEAN CALC-ALKALINE LAVAS, SOUTHERN PERU	SCIENCE	TILTON, G. R.; BAREIRO, B.		-17.15	-69.85	0.01				TIMS	METAMORPHIC	UNKNOWN	UNKNOWN	GNEISS
GNEISS		GEOROC	10.1007/BF00373202	AN ERUPTED MIGMATITE FROM CERRO DEL HOYAZO, SE SPAIN	CONTRIB. MINERAL. PETROL.	ZECK, H. P.		37	-2.4	0.01				WET	METAMORPHIC	UNKNOWN	UNKNOWN	GNEISS	61.06	0.99	20.93	1.97		7.51		3.74		0.37	1.59	0.11	0.06				1.62
PC-312		GEOROC	10.1093/petrology/egr014	IMPLICATIONS OF THE NUVVUAGITTUQ GREENSTONE BELT FOR THE FORMATION OF EARTHS EARLY CRUST	J. PETROL.	O^NEIL, J.; FRANCIS, D. M.; CARLSON, R. W.		58	-77	0.01				XRF	METAMORPHIC	UNKNOWN	UNKNOWN	GNEISS	50.08	0.367	17.07				9.466	11.07	8.22	1.19	0.64	0.029	0.194
PC-312		GEOROC	10.1093/petrology/egr014	IMPLICATIONS OF THE NUVVUAGITTUQ GREENSTONE BELT FOR THE FORMATION OF EARTHS EARLY CRUST	J. PETROL.	O^NEIL, J.; FRANCIS, D. M.; CARLSON, R. W.		58	-77	0.01				IGN	METAMORPHIC	UNKNOWN	UNKNOWN	GNEISS														1.3
BH132		GEOROC	10.1144/GSL.SP.1987.033.01.27	THE GEOCHEMISTRY OF THE LOWER PROTEROZOIC WILLYAMA COMPLEX VOLCANICS, BROKEN HILL BLOCK, NEW SOUTH WALES	SPEC. PUBL. GEOL. SOC. LONDON	JAMES, S. D.; PEARCE, J. A.; OLIVER, R. A.		-31.5	141	0.01				XRF	METAMORPHIC	UNKNOWN	UNKNOWN	GNEISS	47.1	2.2	13.74		19.28			5.72	9.94	2.12	0.14	0.19	0.32
BH132		GEOROC	10.1144/GSL.SP.1987.033.01.27	THE GEOCHEMISTRY OF THE LOWER PROTEROZOIC WILLYAMA COMPLEX VOLCANICS, BROKEN HILL BLOCK, NEW SOUTH WALES	SPEC. PUBL. GEOL. SOC. LONDON	JAMES, S. D.; PEARCE, J. A.; OLIVER, R. A.		-31.5	141	0.01				INAA	METAMORPHIC	UNKNOWN	UNKNOWN	GNEISS																			6.77		19.49		15.13	4.81			1.01
BH132		GEOROC	10.1144/GSL.SP.1987.033.01.27	THE GEOCHEMISTRY OF THE LOWER PROTEROZOIC WILLYAMA COMPLEX VOLCANICS, BROKEN HILL BLOCK, NEW SOUTH WALES	SPEC. PUBL. GEOL. SOC. LONDON	JAMES, S. D.; PEARCE, J. A.; OLIVER, R. A.		-31.5	141	0.01				AAS	METAMORPHIC	UNKNOWN	UNKNOWN	GNEISS
SD944		GEOROC	10.1093/petrology/43.1.3	THE PETROLOGY AND GEOCHEMISTRY OF CALC-ALKALINE ANDESITES ON SHODO-SHIMA ISLAND, SW JAPAN	J. PETROL.	TATSUMI, Y.; NAKASHIMA, T.; TAMURA, Y.		34.45	134.17	0.01				XRF	METAMORPHIC	UNKNOWN	UNKNOWN	GNEISS	63.93	0.71	17.13		5.71			0.7	5.09	3.71	2.3	0.24	0.1
SD944		GEOROC	10.1093/petrology/43.1.3	THE PETROLOGY AND GEOCHEMISTRY OF CALC-ALKALINE ANDESITES ON SHODO-SHIMA ISLAND, SW JAPAN	J. PETROL.	TATSUMI, Y.; NAKASHIMA, T.; TAMURA, Y.		34.45	134.17	0.01				TIMS	METAMORPHIC	UNKNOWN	UNKNOWN	GNEISS
780204		GEOROC	10.1016/0301-9268(84)90050-0	PETROGRAPHY, CHEMISTRY AND ISOTOPIC AGES OF PENINSULAR GNEISS, DHARWAR ACID VOLCANIC ROCKS AND THE CHITRADURGA GRANITE WITH SPECIAL REFERENCE TO THE LATE ARCHAEAN EVOLUTION OF THE KARNATAKA CRATON, SOUTHERN INDIA	PREC. RESEARCH	TAYLOR, P. N.; CHADWICK, B.; MOORBATH, S.; RAMAKRISHNAN, M.; VISWANATHA, M. N.		16.27	77.25	0.01	2500	3175	3850	XRF	METAMORPHIC	UNKNOWN	UNKNOWN	GNEISS
780204		GEOROC	10.1016/0301-9268(84)90050-0	PETROGRAPHY, CHEMISTRY AND ISOTOPIC AGES OF PENINSULAR GNEISS, DHARWAR ACID VOLCANIC ROCKS AND THE CHITRADURGA GRANITE WITH SPECIAL REFERENCE TO THE LATE ARCHAEAN EVOLUTION OF THE KARNATAKA CRATON, SOUTHERN INDIA	PREC. RESEARCH	TAYLOR, P. N.; CHADWICK, B.; MOORBATH, S.; RAMAKRISHNAN, M.; VISWANATHA, M. N.		16.27	77.25	0.01	2500	3175	3850	TIMS	METAMORPHIC	UNKNOWN	UNKNOWN	GNEISS
SS2076		GEOROC	10.1016/S0009-2541(98)00038-2	GENESIS AND EVOLUTION OF MIOCENE-QUATERNARY INTERMEDIATE-ACID ROCKS FROM THE TUSCAN MAGMATIC PROVINCE	PER. MINERAL.	POLI, G.		42.75	11.95	0.01	0.01	1.305	2.6	XRF	METAMORPHIC	UNKNOWN	UNKNOWN	GNEISS	61.4	0.85	20	0.94					0.63	1.35	4.1	0.13	0.05
SS2076		GEOROC	10.1016/S0009-2541(98)00038-2	GENESIS AND EVOLUTION OF MIOCENE-QUATERNARY INTERMEDIATE-ACID ROCKS FROM THE TUSCAN MAGMATIC PROVINCE	PER. MINERAL.	POLI, G.		42.75	11.95	0.01	0.01	1.305	2.6	WET	METAMORPHIC	UNKNOWN	UNKNOWN	GNEISS						4.53		1.95						3.47
SS2076		GEOROC	10.1016/S0009-2541(98)00038-2	GENESIS AND EVOLUTION OF MIOCENE-QUATERNARY INTERMEDIATE-ACID ROCKS FROM THE TUSCAN MAGMATIC PROVINCE	PER. MINERAL.	POLI, G.		42.75	11.95	0.01	0.01	1.305	2.6	INAA	METAMORPHIC	UNKNOWN	UNKNOWN	GNEISS																			51		102		44	8.3	1.6		1.1
71133		GEOROC	10.1016/0899-5362(87)90061-3	PETROLOGICAL AND GEOCHEMICAL EVOLUTION OF THE ALLOCHTHONOUS UNIT OF THE BASIC-ULTRABASIC METAMORPHIC COMPLEX OF CABO ORTEGAL (MOECHE UNIT) AND OF THE SILURIAN PARA-AUTOCHTHONOUS UNIT, NW SPAIN	CORPUS GEOL. GALLAECIAE 2ND SER.	MARTIN, R. A.		43.5	-7.8	0.01				XRF	METAMORPHIC	UNKNOWN	UNKNOWN	GNEISS																			11		20
71133		GEOROC	10.1016/0899-5362(87)90061-3	PETROLOGICAL AND GEOCHEMICAL EVOLUTION OF THE ALLOCHTHONOUS UNIT OF THE BASIC-ULTRABASIC METAMORPHIC COMPLEX OF CABO ORTEGAL (MOECHE UNIT) AND OF THE SILURIAN PARA-AUTOCHTHONOUS UNIT, NW SPAIN	CORPUS GEOL. GALLAECIAE 2ND SER.	MARTIN, R. A.		43.5	-7.8	0.01				WET	METAMORPHIC	UNKNOWN	UNKNOWN	GNEISS	60.86	0.59	17.09	2.2		4.92		2.8	4.58	3.46	1.53	0.12	0.12				1.78
AAM354		USGS		Geochemistry of rock samples from the National Geochemical Database: U.S. Geological Survey, Reston, VA.	U.S. Geological Survey	USGS		35.6108	-81.8083	0.01				ES	METAMORPHIC	UNKNOWN	UNKNOWN	GNEISS
AAM357		USGS		Geochemistry of rock samples from the National Geochemical Database: U.S. Geological Survey, Reston, VA.	U.S. Geological Survey	USGS		35.6108	-81.8083	0.01				ES	METAMORPHIC	UNKNOWN	UNKNOWN	GNEISS																			50
AAM361		USGS		Geochemistry of rock samples from the National Geochemical Database: U.S. Geological Survey, Reston, VA.	U.S. Geological Survey	USGS		35.4392	-81.8017	0.01				ES	METAMORPHIC	UNKNOWN	UNKNOWN	GNEISS																			100
AAM362		USGS		Geochemistry of rock samples from the National Geochemical Database: U.S. Geological Survey, Reston, VA.	U.S. Geological Survey	USGS		35.6072	-81.8044	0.01				ES	METAMORPHIC	UNKNOWN	UNKNOWN	GNEISS
AAM363		USGS		Geochemistry of rock samples from the National Geochemical Database: U.S. Geological Survey, Reston, VA.	U.S. Geological Survey	USGS		35.6072	-81.8044	0.01				ES	METAMORPHIC	UNKNOWN	UNKNOWN	GNEISS
AAM368		USGS		Geochemistry of rock samples from the National Geochemical Database: U.S. Geological Survey, Reston, VA.	U.S. Geological Survey	USGS		35.6072	-81.8042	0.01				ES	METAMORPHIC	UNKNOWN	UNKNOWN	GNEISS
AAM382		USGS		Geochemistry of rock samples from the National Geochemical Database: U.S. Geological Survey, Reston, VA.	U.S. Geological Survey	USGS		35.6144	-81.8036	0.01				ES	METAMORPHIC	UNKNOWN	UNKNOWN	GNEISS																			30
AAM388		USGS		Geochemistry of rock samples from the National Geochemical Database: U.S. Geological Survey, Reston, VA.	U.S. Geological Survey	USGS		35.6103	-81.8006	0.01				ES	METAMORPHIC	UNKNOWN	UNKNOWN	GNEISS																			100
AAM390		USGS		Geochemistry of rock samples from the National Geochemical Database: U.S. Geological Survey, Reston, VA.	U.S. Geological Survey	USGS		35.6269	-81.8011	0.01				ES	METAMORPHIC	UNKNOWN	UNKNOWN	GNEISS																			70
AAM391		USGS		Geochemistry of rock samples from the National Geochemical Database: U.S. Geological Survey, Reston, VA.	U.S. Geological Survey	USGS		35.6269	-81.8011	0.01				ES	METAMORPHIC	UNKNOWN	UNKNOWN	GNEISS																			50
AAM400		USGS		Geochemistry of rock samples from the National Geochemical Database: U.S. Geological Survey, Reston, VA.	U.S. Geological Survey	USGS		35.6122	-81.7956	0.01				ES	METAMORPHIC	UNKNOWN	UNKNOWN	GNEISS																			200
AAM417		USGS		Geochemistry of rock samples from the National Geochemical Database: U.S. Geological Survey, Reston, VA.	U.S. Geological Survey	USGS		35.6114	-81.7978	0.01				ES	METAMORPHIC	UNKNOWN	UNKNOWN	GNEISS																			20
AAM417		USGS		Geochemistry of rock samples from the National Geochemical Database: U.S. Geological Survey, Reston, VA.	U.S. Geological Survey	USGS		35.6114	-81.7978	0.01				COL	METAMORPHIC	UNKNOWN	UNKNOWN	GNEISS
AAM417		USGS		Geochemistry of rock samples from the National Geochemical Database: U.S. Geological Survey, Reston, VA.	U.S. Geological Survey	USGS		35.6114	-81.7978	0.01				AAS	METAMORPHIC	UNKNOWN	UNKNOWN	GNEISS
AAM418		USGS		Geochemistry of rock samples from the National Geochemical Database: U.S. Geological Survey, Reston, VA.	U.S. Geological Survey	USGS		35.6114	-81.7978	0.01				ES	METAMORPHIC	UNKNOWN	UNKNOWN	GNEISS
AAM418		USGS		Geochemistry of rock samples from the National Geochemical Database: U.S. Geological Survey, Reston, VA.	U.S. Geological Survey	USGS		35.6114	-81.7978	0.01				COL	METAMORPHIC	UNKNOWN	UNKNOWN	GNEISS
AAM418		USGS		Geochemistry of rock samples from the National Geochemical Database: U.S. Geological Survey, Reston, VA.	U.S. Geological Survey	USGS		35.6114	-81.7978	0.01				AAS	METAMORPHIC	UNKNOWN	UNKNOWN	GNEISS
AAM422		USGS		Geochemistry of rock samples from the National Geochemical Database: U.S. Geological Survey, Reston, VA.	U.S. Geological Survey	USGS		35.6114	-81.7983	0.01				ES	METAMORPHIC	UNKNOWN	UNKNOWN	GNEISS																			300
AAM423		USGS		Geochemistry of rock samples from the National Geochemical Database: U.S. Geological Survey, Reston, VA.	U.S. Geological Survey	USGS		35.6114	-81.7983	0.01				ES	METAMORPHIC	UNKNOWN	UNKNOWN	GNEISS																			100
AAM424		USGS		Geochemistry of rock samples from the National Geochemical Database: U.S. Geological Survey, Reston, VA.	U.S. Geological Survey	USGS		35.6111	-81.7989	0.01				ES	METAMORPHIC	UNKNOWN	UNKNOWN	GNEISS																			50
AAM425		USGS		Geochemistry of rock samples from the National Geochemical Database: U.S. Geological Survey, Reston, VA.	U.S. Geological Survey	USGS		35.6117	-81.7964	0.01				ES	METAMORPHIC	UNKNOWN	UNKNOWN	GNEISS																			300
AAM426		USGS		Geochemistry of rock samples from the National Geochemical Database: U.S. Geological Survey, Reston, VA.	U.S. Geological Survey	USGS		35.6117	-81.7964	0.01				ES	METAMORPHIC	UNKNOWN	UNKNOWN	GNEISS																			50
AAM427		USGS		Geochemistry of rock samples from the National Geochemical Database: U.S. Geological Survey, Reston, VA.	U.S. Geological Survey	USGS		35.6117	-81.7964	0.01				ES	METAMORPHIC	UNKNOWN	UNKNOWN	GNEISS																			150
AAM428		USGS		Geochemistry of rock samples from the National Geochemical Database: U.S. Geological Survey, Reston, VA.	U.S. Geological Survey	USGS		35.6117	-81.795	0.01				ES	METAMORPHIC	UNKNOWN	UNKNOWN	GNEISS																			70
AAM429		USGS		Geochemistry of rock samples from the National Geochemical Database: U.S. Geological Survey, Reston, VA.	U.S. Geological Survey	USGS		35.6117	-81.795	0.01				ES	METAMORPHIC	UNKNOWN	UNKNOWN	GNEISS																			300
AAM434		USGS		Geochemistry of rock samples from the National Geochemical Database: U.S. Geological Survey, Reston, VA.	U.S. Geological Survey	USGS		35.6106	-81.7886	0.01				ES	METAMORPHIC	UNKNOWN	UNKNOWN	GNEISS																			100
AAM434		USGS		Geochemistry of rock samples from the National Geochemical Database: U.S. Geological Survey, Reston, VA.	U.S. Geological Survey	USGS		35.6106	-81.7886	0.01				COL	METAMORPHIC	UNKNOWN	UNKNOWN	GNEISS
AAM434		USGS		Geochemistry of rock samples from the National Geochemical Database: U.S. Geological Survey, Reston, VA.	U.S. Geological Survey	USGS		35.6106	-81.7886	0.01				AAS	METAMORPHIC	UNKNOWN	UNKNOWN	GNEISS
AAM435		USGS		Geochemistry of rock samples from the National Geochemical Database: U.S. Geological Survey, Reston, VA.	U.S. Geological Survey	USGS		35.6906	-81.7789	0.01				ES	METAMORPHIC	UNKNOWN	UNKNOWN	GNEISS																			50
AAM435		USGS		Geochemistry of rock samples from the National Geochemical Database: U.S. Geological Survey, Reston, VA.	U.S. Geological Survey	USGS		35.6906	-81.7789	0.01				AAS	METAMORPHIC	UNKNOWN	UNKNOWN	GNEISS
AAM436		USGS		Geochemistry of rock samples from the National Geochemical Database: U.S. Geological Survey, Reston, VA.	U.S. Geological Survey	USGS		35.6928	-81.7714	0.01				ES	METAMORPHIC	UNKNOWN	UNKNOWN	GNEISS																			50
AAM436		USGS		Geochemistry of rock samples from the National Geochemical Database: U.S. Geological Survey, Reston, VA.	U.S. Geological Survey	USGS		35.6928	-81.7714	0.01				COL	METAMORPHIC	UNKNOWN	UNKNOWN	GNEISS
AAM436		USGS		Geochemistry of rock samples from the National Geochemical Database: U.S. Geological Survey, Reston, VA.	U.S. Geological Survey	USGS		35.6928	-81.7714	0.01				AAS	METAMORPHIC	UNKNOWN	UNKNOWN	GNEISS
AAM445		USGS		Geochemistry of rock samples from the National Geochemical Database: U.S. Geological Survey, Reston, VA.	U.S. Geological Survey	USGS		35.8606	-81.6889	0.01				ES	METAMORPHIC	UNKNOWN	UNKNOWN	GNEISS
AAM445		USGS		Geochemistry of rock samples from the National Geochemical Database: U.S. Geological Survey, Reston, VA.	U.S. Geological Survey	USGS		35.8606	-81.6889	0.01				AAS	METAMORPHIC	UNKNOWN	UNKNOWN	GNEISS
AAM447		USGS		Geochemistry of rock samples from the National Geochemical Database: U.S. Geological Survey, Reston, VA.	U.S. Geological Survey	USGS		35.8594	-81.6903	0.01				ES	METAMORPHIC	UNKNOWN	UNKNOWN	GNEISS																			50
AAM447		USGS		Geochemistry of rock samples from the National Geochemical Database: U.S. Geological Survey, Reston, VA.	U.S. Geological Survey	USGS		35.8594	-81.6903	0.01				COL	METAMORPHIC	UNKNOWN	UNKNOWN	GNEISS
AAM447		USGS		Geochemistry of rock samples from the National Geochemical Database: U.S. Geological Survey, Reston, VA.	U.S. Geological Survey	USGS		35.8594	-81.6903	0.01				AAS	METAMORPHIC	UNKNOWN	UNKNOWN	GNEISS
AAM455		USGS		Geochemistry of rock samples from the National Geochemical Database: U.S. Geological Survey, Reston, VA.	U.S. Geological Survey	USGS		35.8272	-81.6717	0.01				ES	METAMORPHIC	UNKNOWN	UNKNOWN	GNEISS																			70
AAM455		USGS		Geochemistry of rock samples from the National Geochemical Database: U.S. Geological Survey, Reston, VA.	U.S. Geological Survey	USGS		35.8272	-81.6717	0.01				COL	METAMORPHIC	UNKNOWN	UNKNOWN	GNEISS
AAM455		USGS		Geochemistry of rock samples from the National Geochemical Database: U.S. Geological Survey, Reston, VA.	U.S. Geological Survey	USGS		35.8272	-81.6717	0.01				AAS	METAMORPHIC	UNKNOWN	UNKNOWN	GNEISS
AAM458		USGS		Geochemistry of rock samples from the National Geochemical Database: U.S. Geological Survey, Reston, VA.	U.S. Geological Survey	USGS		35.8272	-81.6717	0.01				ES	METAMORPHIC	UNKNOWN	UNKNOWN	GNEISS																			200
AAM458		USGS		Geochemistry of rock samples from the National Geochemical Database: U.S. Geological Survey, Reston, VA.	U.S. Geological Survey	USGS		35.8272	-81.6717	0.01				COL	METAMORPHIC	UNKNOWN	UNKNOWN	GNEISS
AAM458		USGS		Geochemistry of rock samples from the National Geochemical Database: U.S. Geological Survey, Reston, VA.	U.S. Geological Survey	USGS		35.8272	-81.6717	0.01				AAS	METAMORPHIC	UNKNOWN	UNKNOWN	GNEISS
AAM460		USGS		Geochemistry of rock samples from the National Geochemical Database: U.S. Geological Survey, Reston, VA.	U.S. Geological Survey	USGS		35.8269	-81.6714	0.01				ES	METAMORPHIC	UNKNOWN	UNKNOWN	GNEISS																			20
AAM460		USGS		Geochemistry of rock samples from the National Geochemical Database: U.S. Geological Survey, Reston, VA.	U.S. Geological Survey	USGS		35.8269	-81.6714	0.01				COL	METAMORPHIC	UNKNOWN	UNKNOWN	GNEISS
AAM460		USGS		Geochemistry of rock samples from the National Geochemical Database: U.S. Geological Survey, Reston, VA.	U.S. Geological Survey	USGS		35.8269	-81.6714	0.01				AAS	METAMORPHIC	UNKNOWN	UNKNOWN	GNEISS
AAM471		USGS		Geochemistry of rock samples from the National Geochemical Database: U.S. Geological Survey, Reston, VA.	U.S. Geological Survey	USGS		35.8917	-81.6911	0.01				ES	METAMORPHIC	UNKNOWN	UNKNOWN	GNEISS																			150
AAM476		USGS		Geochemistry of rock samples from the National Geochemical Database: U.S. Geological Survey, Reston, VA.	U.S. Geological Survey	USGS		35.8694	-81.7056	0.01				ES	METAMORPHIC	UNKNOWN	UNKNOWN	GNEISS																			100
AAM487		USGS		Geochemistry of rock samples from the National Geochemical Database: U.S. Geological Survey, Reston, VA.	U.S. Geological Survey	USGS		35.8656	-81.6994	0.01				ES	METAMORPHIC	UNKNOWN	UNKNOWN	GNEISS																			100
AAM487		USGS		Geochemistry of rock samples from the National Geochemical Database: U.S. Geological Survey, Reston, VA.	U.S. Geological Survey	USGS		35.8656	-81.6994	0.01				COL	METAMORPHIC	UNKNOWN	UNKNOWN	GNEISS
AAM487		USGS		Geochemistry of rock samples from the National Geochemical Database: U.S. Geological Survey, Reston, VA.	U.S. Geological Survey	USGS		35.8656	-81.6994	0.01				AAS	METAMORPHIC	UNKNOWN	UNKNOWN	GNEISS
AAM488		USGS		Geochemistry of rock samples from the National Geochemical Database: U.S. Geological Survey, Reston, VA.	U.S. Geological Survey	USGS		35.8653	-81.6992	0.01				ES	METAMORPHIC	UNKNOWN	UNKNOWN	GNEISS																			70
AAM488		USGS		Geochemistry of rock samples from the National Geochemical Database: U.S. Geological Survey, Reston, VA.	U.S. Geological Survey	USGS		35.8653	-81.6992	0.01				COL	METAMORPHIC	UNKNOWN	UNKNOWN	GNEISS
AAM488		USGS		Geochemistry of rock samples from the National Geochemical Database: U.S. Geological Survey, Reston, VA.	U.S. Geological Survey	USGS		35.8653	-81.6992	0.01				AAS	METAMORPHIC	UNKNOWN	UNKNOWN	GNEISS
AAM494		USGS		Geochemistry of rock samples from the National Geochemical Database: U.S. Geological Survey, Reston, VA.	U.S. Geological Survey	USGS		35.8594	-81.6903	0.01				ES	METAMORPHIC	UNKNOWN	UNKNOWN	GNEISS																			300
AAM495		USGS		Geochemistry of rock samples from the National Geochemical Database: U.S. Geological Survey, Reston, VA.	U.S. Geological Survey	USGS		35.8594	-81.6903	0.01				ES	METAMORPHIC	UNKNOWN	UNKNOWN	GNEISS																			300
AAM496		USGS		Geochemistry of rock samples from the National Geochemical Database: U.S. Geological Survey, Reston, VA.	U.S. Geological Survey	USGS		35.8594	-81.6903	0.01				ES	METAMORPHIC	UNKNOWN	UNKNOWN	GNEISS																			500
AAM497		USGS		Geochemistry of rock samples from the National Geochemical Database: U.S. Geological Survey, Reston, VA.	U.S. Geological Survey	USGS		35.8594	-81.6903	0.01				ES	METAMORPHIC	UNKNOWN	UNKNOWN	GNEISS																			200
AAM498		USGS		Geochemistry of rock samples from the National Geochemical Database: U.S. Geological Survey, Reston, VA.	U.S. Geological Survey	USGS		35.8594	-81.6903	0.01				ES	METAMORPHIC	UNKNOWN	UNKNOWN	GNEISS																			100
ABN089		USGS		Geochemistry of rock samples from the National Geochemical Database: U.S. Geological Survey, Reston, VA.	U.S. Geological Survey	USGS		35.6022	-81.8194	0.01				ES	METAMORPHIC	UNKNOWN	UNKNOWN	GNEISS
ABN089		USGS		Geochemistry of rock samples from the National Geochemical Database: U.S. Geological Survey, Reston, VA.	U.S. Geological Survey	USGS		35.6022	-81.8194	0.01				COL	METAMORPHIC	UNKNOWN	UNKNOWN	GNEISS
ABN198		USGS		Geochemistry of rock samples from the National Geochemical Database: U.S. Geological Survey, Reston, VA.	U.S. Geological Survey	USGS		35.6019	-81.8194	0.01				ES	METAMORPHIC	UNKNOWN	UNKNOWN	GNEISS
ABN198		USGS		Geochemistry of rock samples from the National Geochemical Database: U.S. Geological Survey, Reston, VA.	U.S. Geological Survey	USGS		35.6019	-81.8194	0.01				COL	METAMORPHIC	UNKNOWN	UNKNOWN	GNEISS
ABN199		USGS		Geochemistry of rock samples from the National Geochemical Database: U.S. Geological Survey, Reston, VA.	U.S. Geological Survey	USGS		35.6022	-81.8194	0.01				ES	METAMORPHIC	UNKNOWN	UNKNOWN	GNEISS
ABN199		USGS		Geochemistry of rock samples from the National Geochemical Database: U.S. Geological Survey, Reston, VA.	U.S. Geological Survey	USGS		35.6022	-81.8194	0.01				COL	METAMORPHIC	UNKNOWN	UNKNOWN	GNEISS
ABN535		USGS		Geochemistry of rock samples from the National Geochemical Database: U.S. Geological Survey, Reston, VA.	U.S. Geological Survey	USGS		35.5497	-81.8258	0.01				ES	METAMORPHIC	UNKNOWN	UNKNOWN	GNEISS																			30
ABN535		USGS		Geochemistry of rock samples from the National Geochemical Database: U.S. Geological Survey, Reston, VA.	U.S. Geological Survey	USGS		35.5497	-81.8258	0.01				AAS	METAMORPHIC	UNKNOWN	UNKNOWN	GNEISS
ABN536		USGS		Geochemistry of rock samples from the National Geochemical Database: U.S. Geological Survey, Reston, VA.	U.S. Geological Survey	USGS		35.5475	-81.8189	0.01				ES	METAMORPHIC	UNKNOWN	UNKNOWN	GNEISS																			200
ABN536		USGS		Geochemistry of rock samples from the National Geochemical Database: U.S. Geological Survey, Reston, VA.	U.S. Geological Survey	USGS		35.5475	-81.8189	0.01				AAS	METAMORPHIC	UNKNOWN	UNKNOWN	GNEISS
ABN539		USGS		Geochemistry of rock samples from the National Geochemical Database: U.S. Geological Survey, Reston, VA.	U.S. Geological Survey	USGS		35.5628	-81.8194	0.01				ES	METAMORPHIC	UNKNOWN	UNKNOWN	GNEISS																			20
ABN539		USGS		Geochemistry of rock samples from the National Geochemical Database: U.S. Geological Survey, Reston, VA.	U.S. Geological Survey	USGS		35.5628	-81.8194	0.01				AAS	METAMORPHIC	UNKNOWN	UNKNOWN	GNEISS
ABO207		USGS		Geochemistry of rock samples from the National Geochemical Database: U.S. Geological Survey, Reston, VA.	U.S. Geological Survey	USGS		36.69	-78.9033	0.01				ES	METAMORPHIC	UNKNOWN	UNKNOWN	GNEISS
ABO207		USGS		Geochemistry of rock samples from the National Geochemical Database: U.S. Geological Survey, Reston, VA.	U.S. Geological Survey	USGS		36.69	-78.9033	0.01				COL	METAMORPHIC	UNKNOWN	UNKNOWN	GNEISS
ABO207		USGS		Geochemistry of rock samples from the National Geochemical Database: U.S. Geological Survey, Reston, VA.	U.S. Geological Survey	USGS		36.69	-78.9033	0.01				AAS	METAMORPHIC	UNKNOWN	UNKNOWN	GNEISS
ABO211		USGS		Geochemistry of rock samples from the National Geochemical Database: U.S. Geological Survey, Reston, VA.	U.S. Geological Survey	USGS		36.9583	-79.4714	0.01				ES	METAMORPHIC	UNKNOWN	UNKNOWN	GNEISS
ABO211		USGS		Geochemistry of rock samples from the National Geochemical Database: U.S. Geological Survey, Reston, VA.	U.S. Geological Survey	USGS		36.9583	-79.4714	0.01				COL	METAMORPHIC	UNKNOWN	UNKNOWN	GNEISS
ABO211		USGS		Geochemistry of rock samples from the National Geochemical Database: U.S. Geological Survey, Reston, VA.	U.S. Geological Survey	USGS		36.9583	-79.4714	0.01				AAS	METAMORPHIC	UNKNOWN	UNKNOWN	GNEISS
ABO226		USGS		Geochemistry of rock samples from the National Geochemical Database: U.S. Geological Survey, Reston, VA.	U.S. Geological Survey	USGS		35.6556	-81.05	0.01				ES	METAMORPHIC	UNKNOWN	UNKNOWN	GNEISS
ABO226		USGS		Geochemistry of rock samples from the National Geochemical Database: U.S. Geological Survey, Reston, VA.	U.S. Geological Survey	USGS		35.6556	-81.05	0.01				COL	METAMORPHIC	UNKNOWN	UNKNOWN	GNEISS
ABO226		USGS		Geochemistry of rock samples from the National Geochemical Database: U.S. Geological Survey, Reston, VA.	U.S. Geological Survey	USGS		35.6556	-81.05	0.01				AAS	METAMORPHIC	UNKNOWN	UNKNOWN	GNEISS
ABO234		USGS		Geochemistry of rock samples from the National Geochemical Database: U.S. Geological Survey, Reston, VA.	U.S. Geological Survey	USGS		35.6583	-80.975	0.01				ES	METAMORPHIC	UNKNOWN	UNKNOWN	GNEISS																			150
ABO234		USGS		Geochemistry of rock samples from the National Geochemical Database: U.S. Geological Survey, Reston, VA.	U.S. Geological Survey	USGS		35.6583	-80.975	0.01				COL	METAMORPHIC	UNKNOWN	UNKNOWN	GNEISS
ABO248		USGS		Geochemistry of rock samples from the National Geochemical Database: U.S. Geological Survey, Reston, VA.	U.S. Geological Survey	USGS		35.8694	-81.6653	0.01				ES	METAMORPHIC	UNKNOWN	UNKNOWN	GNEISS
ABO248		USGS		Geochemistry of rock samples from the National Geochemical Database: U.S. Geological Survey, Reston, VA.	U.S. Geological Survey	USGS		35.8694	-81.6653	0.01				COL	METAMORPHIC	UNKNOWN	UNKNOWN	GNEISS
ABO300		USGS		Geochemistry of rock samples from the National Geochemical Database: U.S. Geological Survey, Reston, VA.	U.S. Geological Survey	USGS		34	-83.75	0.01				ES	METAMORPHIC	UNKNOWN	UNKNOWN	GNEISS																			150
ABO300		USGS		Geochemistry of rock samples from the National Geochemical Database: U.S. Geological Survey, Reston, VA.	U.S. Geological Survey	USGS		34	-83.75	0.01				AAS	METAMORPHIC	UNKNOWN	UNKNOWN	GNEISS
ABO314		USGS		Geochemistry of rock samples from the National Geochemical Database: U.S. Geological Survey, Reston, VA.	U.S. Geological Survey	USGS		34.4167	-84	0.01				ES	METAMORPHIC	UNKNOWN	UNKNOWN	GNEISS																			150
ABO314		USGS		Geochemistry of rock samples from the National Geochemical Database: U.S. Geological Survey, Reston, VA.	U.S. Geological Survey	USGS		34.4167	-84	0.01				COL	METAMORPHIC	UNKNOWN	UNKNOWN	GNEISS
ABO314		USGS		Geochemistry of rock samples from the National Geochemical Database: U.S. Geological Survey, Reston, VA.	U.S. Geological Survey	USGS		34.4167	-84	0.01				AAS	METAMORPHIC	UNKNOWN	UNKNOWN	GNEISS
ABO378		USGS		Geochemistry of rock samples from the National Geochemical Database: U.S. Geological Survey, Reston, VA.	U.S. Geological Survey	USGS		35.9139	-81.3583	0.01				ES	METAMORPHIC	UNKNOWN	UNKNOWN	GNEISS
ABO378		USGS		Geochemistry of rock samples from the National Geochemical Database: U.S. Geological Survey, Reston, VA.	U.S. Geological Survey	USGS		35.9139	-81.3583	0.01				COL	METAMORPHIC	UNKNOWN	UNKNOWN	GNEISS
ABO392		USGS		Geochemistry of rock samples from the National Geochemical Database: U.S. Geological Survey, Reston, VA.	U.S. Geological Survey	USGS		35.9083	-81.2292	0.01				ES	METAMORPHIC	UNKNOWN	UNKNOWN	GNEISS
ABO392		USGS		Geochemistry of rock samples from the National Geochemical Database: U.S. Geological Survey, Reston, VA.	U.S. Geological Survey	USGS		35.9083	-81.2292	0.01				COL	METAMORPHIC	UNKNOWN	UNKNOWN	GNEISS
ABO403		USGS		Geochemistry of rock samples from the National Geochemical Database: U.S. Geological Survey, Reston, VA.	U.S. Geological Survey	USGS		35.8819	-81.1639	0.01				ES	METAMORPHIC	UNKNOWN	UNKNOWN	GNEISS
ABO403		USGS		Geochemistry of rock samples from the National Geochemical Database: U.S. Geological Survey, Reston, VA.	U.S. Geological Survey	USGS		35.8819	-81.1639	0.01				COL	METAMORPHIC	UNKNOWN	UNKNOWN	GNEISS
ABO406		USGS		Geochemistry of rock samples from the National Geochemical Database: U.S. Geological Survey, Reston, VA.	U.S. Geological Survey	USGS		36.0028	-81.1903	0.01				ES	METAMORPHIC	UNKNOWN	UNKNOWN	GNEISS																			30
ABO406		USGS		Geochemistry of rock samples from the National Geochemical Database: U.S. Geological Survey, Reston, VA.	U.S. Geological Survey	USGS		36.0028	-81.1903	0.01				COL	METAMORPHIC	UNKNOWN	UNKNOWN	GNEISS
ABO417		USGS		Geochemistry of rock samples from the National Geochemical Database: U.S. Geological Survey, Reston, VA.	U.S. Geological Survey	USGS		35.8022	-81.5786	0.01				ES	METAMORPHIC	UNKNOWN	UNKNOWN	GNEISS																			50
ABO417		USGS		Geochemistry of rock samples from the National Geochemical Database: U.S. Geological Survey, Reston, VA.	U.S. Geological Survey	USGS		35.8022	-81.5786	0.01				COL	METAMORPHIC	UNKNOWN	UNKNOWN	GNEISS
ABO419		USGS		Geochemistry of rock samples from the National Geochemical Database: U.S. Geological Survey, Reston, VA.	U.S. Geological Survey	USGS		35.7978	-81.5742	0.01				ES	METAMORPHIC	UNKNOWN	UNKNOWN	GNEISS																			50
ABO459		USGS		Geochemistry of rock samples from the National Geochemical Database: U.S. Geological Survey, Reston, VA.	U.S. Geological Survey	USGS		35.9208	-81.6056	0.01				ES	METAMORPHIC	UNKNOWN	UNKNOWN	GNEISS																			150
ABO459		USGS		Geochemistry of rock samples from the National Geochemical Database: U.S. Geological Survey, Reston, VA.	U.S. Geological Survey	USGS		35.9208	-81.6056	0.01				COL	METAMORPHIC	UNKNOWN	UNKNOWN	GNEISS
ABO591		USGS		Geochemistry of rock samples from the National Geochemical Database: U.S. Geological Survey, Reston, VA.	U.S. Geological Survey	USGS		35.9306	-81.7414	0.01				ES	METAMORPHIC	UNKNOWN	UNKNOWN	GNEISS																			150
ABO591		USGS		Geochemistry of rock samples from the National Geochemical Database: U.S. Geological Survey, Reston, VA.	U.S. Geological Survey	USGS		35.9306	-81.7414	0.01				COL	METAMORPHIC	UNKNOWN	UNKNOWN	GNEISS
ABO591		USGS		Geochemistry of rock samples from the National Geochemical Database: U.S. Geological Survey, Reston, VA.	U.S. Geological Survey	USGS		35.9306	-81.7414	0.01				AAS	METAMORPHIC	UNKNOWN	UNKNOWN	GNEISS
ABU212		USGS		Geochemistry of rock samples from the National Geochemical Database: U.S. Geological Survey, Reston, VA.	U.S. Geological Survey	USGS		36.7292	-78.8486	0.01				ES	METAMORPHIC	UNKNOWN	UNKNOWN	GNEISS
ABU212		USGS		Geochemistry of rock samples from the National Geochemical Database: U.S. Geological Survey, Reston, VA.	U.S. Geological Survey	USGS		36.7292	-78.8486	0.01				COL	METAMORPHIC	UNKNOWN	UNKNOWN	GNEISS
ABU975		USGS		Geochemistry of rock samples from the National Geochemical Database: U.S. Geological Survey, Reston, VA.	U.S. Geological Survey	USGS		35.8694	-81.6653	0.01				ES	METAMORPHIC	UNKNOWN	UNKNOWN	GNEISS																			150
ABU975		USGS		Geochemistry of rock samples from the National Geochemical Database: U.S. Geological Survey, Reston, VA.	U.S. Geological Survey	USGS		35.8694	-81.6653	0.01				AAS	METAMORPHIC	UNKNOWN	UNKNOWN	GNEISS
ABV001		USGS		Geochemistry of rock samples from the National Geochemical Database: U.S. Geological Survey, Reston, VA.	U.S. Geological Survey	USGS		35.5792	-81.9314	0.01				ES	METAMORPHIC	UNKNOWN	UNKNOWN	GNEISS
ABV001		USGS		Geochemistry of rock samples from the National Geochemical Database: U.S. Geological Survey, Reston, VA.	U.S. Geological Survey	USGS		35.5792	-81.9314	0.01				AAS	METAMORPHIC	UNKNOWN	UNKNOWN	GNEISS
ABV029		USGS		Geochemistry of rock samples from the National Geochemical Database: U.S. Geological Survey, Reston, VA.	U.S. Geological Survey	USGS		35.9856	-80.8458	0.01				ES	METAMORPHIC	UNKNOWN	UNKNOWN	GNEISS																			200
ABV029		USGS		Geochemistry of rock samples from the National Geochemical Database: U.S. Geological Survey, Reston, VA.	U.S. Geological Survey	USGS		35.9856	-80.8458	0.01				AAS	METAMORPHIC	UNKNOWN	UNKNOWN	GNEISS
ABV068		USGS		Geochemistry of rock samples from the National Geochemical Database: U.S. Geological Survey, Reston, VA.	U.S. Geological Survey	USGS		35.8783	-80.7794	0.01				ES	METAMORPHIC	UNKNOWN	UNKNOWN	GNEISS																			30
ABV068		USGS		Geochemistry of rock samples from the National Geochemical Database: U.S. Geological Survey, Reston, VA.	U.S. Geological Survey	USGS		35.8783	-80.7794	0.01				COL	METAMORPHIC	UNKNOWN	UNKNOWN	GNEISS
ABV068		USGS		Geochemistry of rock samples from the National Geochemical Database: U.S. Geological Survey, Reston, VA.	U.S. Geological Survey	USGS		35.8783	-80.7794	0.01				AAS	METAMORPHIC	UNKNOWN	UNKNOWN	GNEISS
ABV128		USGS		Geochemistry of rock samples from the National Geochemical Database: U.S. Geological Survey, Reston, VA.	U.S. Geological Survey	USGS		35.8567	-80.8575	0.01				ES	METAMORPHIC	UNKNOWN	UNKNOWN	GNEISS																			50
ABV128		USGS		Geochemistry of rock samples from the National Geochemical Database: U.S. Geological Survey, Reston, VA.	U.S. Geological Survey	USGS		35.8567	-80.8575	0.01				AAS	METAMORPHIC	UNKNOWN	UNKNOWN	GNEISS
ABV139		USGS		Geochemistry of rock samples from the National Geochemical Database: U.S. Geological Survey, Reston, VA.	U.S. Geological Survey	USGS		35.9956	-80.8517	0.01				ES	METAMORPHIC	UNKNOWN	UNKNOWN	GNEISS																			50
ABV139		USGS		Geochemistry of rock samples from the National Geochemical Database: U.S. Geological Survey, Reston, VA.	U.S. Geological Survey	USGS		35.9956	-80.8517	0.01				AAS	METAMORPHIC	UNKNOWN	UNKNOWN	GNEISS
ABV148		USGS		Geochemistry of rock samples from the National Geochemical Database: U.S. Geological Survey, Reston, VA.	U.S. Geological Survey	USGS		35.5839	-81.8689	0.01				ES	METAMORPHIC	UNKNOWN	UNKNOWN	GNEISS
ABV148		USGS		Geochemistry of rock samples from the National Geochemical Database: U.S. Geological Survey, Reston, VA.	U.S. Geological Survey	USGS		35.5839	-81.8689	0.01				AAS	METAMORPHIC	UNKNOWN	UNKNOWN	GNEISS
ABV149		USGS		Geochemistry of rock samples from the National Geochemical Database: U.S. Geological Survey, Reston, VA.	U.S. Geological Survey	USGS		35.5839	-81.8689	0.01				ES	METAMORPHIC	UNKNOWN	UNKNOWN	GNEISS
ABV149		USGS		Geochemistry of rock samples from the National Geochemical Database: U.S. Geological Survey, Reston, VA.	U.S. Geological Survey	USGS		35.5839	-81.8689	0.01				AAS	METAMORPHIC	UNKNOWN	UNKNOWN	GNEISS
ABV153		USGS		Geochemistry of rock samples from the National Geochemical Database: U.S. Geological Survey, Reston, VA.	U.S. Geological Survey	USGS		35.7867	-81.0044	0.01				ES	METAMORPHIC	UNKNOWN	UNKNOWN	GNEISS																			20
ABV153		USGS		Geochemistry of rock samples from the National Geochemical Database: U.S. Geological Survey, Reston, VA.	U.S. Geological Survey	USGS		35.7867	-81.0044	0.01				AAS	METAMORPHIC	UNKNOWN	UNKNOWN	GNEISS
ABV159		USGS		Geochemistry of rock samples from the National Geochemical Database: U.S. Geological Survey, Reston, VA.	U.S. Geological Survey	USGS		35.7961	-81.0244	0.01				ES	METAMORPHIC	UNKNOWN	UNKNOWN	GNEISS																			50
ABV159		USGS		Geochemistry of rock samples from the National Geochemical Database: U.S. Geological Survey, Reston, VA.	U.S. Geological Survey	USGS		35.7961	-81.0244	0.01				AAS	METAMORPHIC	UNKNOWN	UNKNOWN	GNEISS
ABV174		USGS		Geochemistry of rock samples from the National Geochemical Database: U.S. Geological Survey, Reston, VA.	U.S. Geological Survey	USGS		35.8058	-80.9208	0.01				ES	METAMORPHIC	UNKNOWN	UNKNOWN	GNEISS																			20
ABV174		USGS		Geochemistry of rock samples from the National Geochemical Database: U.S. Geological Survey, Reston, VA.	U.S. Geological Survey	USGS		35.8058	-80.9208	0.01				AAS	METAMORPHIC	UNKNOWN	UNKNOWN	GNEISS
ABV175		USGS		Geochemistry of rock samples from the National Geochemical Database: U.S. Geological Survey, Reston, VA.	U.S. Geological Survey	USGS		35.8058	-80.9208	0.01				ES	METAMORPHIC	UNKNOWN	UNKNOWN	GNEISS																			50
ABV175		USGS		Geochemistry of rock samples from the National Geochemical Database: U.S. Geological Survey, Reston, VA.	U.S. Geological Survey	USGS		35.8058	-80.9208	0.01				AAS	METAMORPHIC	UNKNOWN	UNKNOWN	GNEISS
ABV207		USGS		Geochemistry of rock samples from the National Geochemical Database: U.S. Geological Survey, Reston, VA.	U.S. Geological Survey	USGS		35.7039	-80.9633	0.01				ES	METAMORPHIC	UNKNOWN	UNKNOWN	GNEISS																			100
ABV207		USGS		Geochemistry of rock samples from the National Geochemical Database: U.S. Geological Survey, Reston, VA.	U.S. Geological Survey	USGS		35.7039	-80.9633	0.01				AAS	METAMORPHIC	UNKNOWN	UNKNOWN	GNEISS
ABV237		USGS		Geochemistry of rock samples from the National Geochemical Database: U.S. Geological Survey, Reston, VA.	U.S. Geological Survey	USGS		35.9089	-81.0383	0.01				ES	METAMORPHIC	UNKNOWN	UNKNOWN	GNEISS																			50
ABV237		USGS		Geochemistry of rock samples from the National Geochemical Database: U.S. Geological Survey, Reston, VA.	U.S. Geological Survey	USGS		35.9089	-81.0383	0.01				AAS	METAMORPHIC	UNKNOWN	UNKNOWN	GNEISS
ABV248		USGS		Geochemistry of rock samples from the National Geochemical Database: U.S. Geological Survey, Reston, VA.	U.S. Geological Survey	USGS		35.9333	-81.1556	0.01				ES	METAMORPHIC	UNKNOWN	UNKNOWN	GNEISS																			100
ABV248		USGS		Geochemistry of rock samples from the National Geochemical Database: U.S. Geological Survey, Reston, VA.	U.S. Geological Survey	USGS		35.9333	-81.1556	0.01				AAS	METAMORPHIC	UNKNOWN	UNKNOWN	GNEISS
ABV322		USGS		Geochemistry of rock samples from the National Geochemical Database: U.S. Geological Survey, Reston, VA.	U.S. Geological Survey	USGS		35.9656	-81.1194	0.01				ES	METAMORPHIC	UNKNOWN	UNKNOWN	GNEISS
ABV323		USGS		Geochemistry of rock samples from the National Geochemical Database: U.S. Geological Survey, Reston, VA.	U.S. Geological Survey	USGS		35.9656	-81.1194	0.01				ES	METAMORPHIC	UNKNOWN	UNKNOWN	GNEISS																			20
ABV329		USGS		Geochemistry of rock samples from the National Geochemical Database: U.S. Geological Survey, Reston, VA.	U.S. Geological Survey	USGS		35.8347	-80.7361	0.01				ES	METAMORPHIC	UNKNOWN	UNKNOWN	GNEISS																			30
ABY884		USGS		Geochemistry of rock samples from the National Geochemical Database: U.S. Geological Survey, Reston, VA.	U.S. Geological Survey	USGS		34.7733	-81.8508	0.01				ES	METAMORPHIC	UNKNOWN	UNKNOWN	GNEISS																			50
ABY885		USGS		Geochemistry of rock samples from the National Geochemical Database: U.S. Geological Survey, Reston, VA.	U.S. Geological Survey	USGS		34.8458	-81.7683	0.01				ES	METAMORPHIC	UNKNOWN	UNKNOWN	GNEISS																			50
ABY954		USGS		Geochemistry of rock samples from the National Geochemical Database: U.S. Geological Survey, Reston, VA.	U.S. Geological Survey	USGS		34.8528	-81.7778	0.01				ES	METAMORPHIC	UNKNOWN	UNKNOWN	GNEISS
ABY954		USGS		Geochemistry of rock samples from the National Geochemical Database: U.S. Geological Survey, Reston, VA.	U.S. Geological Survey	USGS		34.8528	-81.7778	0.01				AAS	METAMORPHIC	UNKNOWN	UNKNOWN	GNEISS
ABY955		USGS		Geochemistry of rock samples from the National Geochemical Database: U.S. Geological Survey, Reston, VA.	U.S. Geological Survey	USGS		34.8603	-81.7833	0.01				ES	METAMORPHIC	UNKNOWN	UNKNOWN	GNEISS																			150
ABY955		USGS		Geochemistry of rock samples from the National Geochemical Database: U.S. Geological Survey, Reston, VA.	U.S. Geological Survey	USGS		34.8603	-81.7833	0.01				AAS	METAMORPHIC	UNKNOWN	UNKNOWN	GNEISS
ABY956		USGS		Geochemistry of rock samples from the National Geochemical Database: U.S. Geological Survey, Reston, VA.	U.S. Geological Survey	USGS		34.8528	-81.7778	0.01				ES	METAMORPHIC	UNKNOWN	UNKNOWN	GNEISS
ABY956		USGS		Geochemistry of rock samples from the National Geochemical Database: U.S. Geological Survey, Reston, VA.	U.S. Geological Survey	USGS		34.8528	-81.7778	0.01				AAS	METAMORPHIC	UNKNOWN	UNKNOWN	GNEISS
ABY957		USGS		Geochemistry of rock samples from the National Geochemical Database: U.S. Geological Survey, Reston, VA.	U.S. Geological Survey	USGS		34.8528	-81.7778	0.01				ES	METAMORPHIC	UNKNOWN	UNKNOWN	GNEISS																			50
ABY957		USGS		Geochemistry of rock samples from the National Geochemical Database: U.S. Geological Survey, Reston, VA.	U.S. Geological Survey	USGS		34.8528	-81.7778	0.01				AAS	METAMORPHIC	UNKNOWN	UNKNOWN	GNEISS
ABY958		USGS		Geochemistry of rock samples from the National Geochemical Database: U.S. Geological Survey, Reston, VA.	U.S. Geological Survey	USGS		34.8528	-81.7778	0.01				ES	METAMORPHIC	UNKNOWN	UNKNOWN	GNEISS																			100
ABY958		USGS		Geochemistry of rock samples from the National Geochemical Database: U.S. Geological Survey, Reston, VA.	U.S. Geological Survey	USGS		34.8528	-81.7778	0.01				AAS	METAMORPHIC	UNKNOWN	UNKNOWN	GNEISS
ABY962		USGS		Geochemistry of rock samples from the National Geochemical Database: U.S. Geological Survey, Reston, VA.	U.S. Geological Survey	USGS		34.8603	-81.7833	0.01				ES	METAMORPHIC	UNKNOWN	UNKNOWN	GNEISS																			70
ABY962		USGS		Geochemistry of rock samples from the National Geochemical Database: U.S. Geological Survey, Reston, VA.	U.S. Geological Survey	USGS		34.8603	-81.7833	0.01				AAS	METAMORPHIC	UNKNOWN	UNKNOWN	GNEISS
ABY963		USGS		Geochemistry of rock samples from the National Geochemical Database: U.S. Geological Survey, Reston, VA.	U.S. Geological Survey	USGS		34.8528	-81.7778	0.01				ES	METAMORPHIC	UNKNOWN	UNKNOWN	GNEISS
ABY963		USGS		Geochemistry of rock samples from the National Geochemical Database: U.S. Geological Survey, Reston, VA.	U.S. Geological Survey	USGS		34.8528	-81.7778	0.01				AAS	METAMORPHIC	UNKNOWN	UNKNOWN	GNEISS
ABY969		USGS		Geochemistry of rock samples from the National Geochemical Database: U.S. Geological Survey, Reston, VA.	U.S. Geological Survey	USGS		34.8603	-81.7833	0.01				ES	METAMORPHIC	UNKNOWN	UNKNOWN	GNEISS																			100
ABY969		USGS		Geochemistry of rock samples from the National Geochemical Database: U.S. Geological Survey, Reston, VA.	U.S. Geological Survey	USGS		34.8603	-81.7833	0.01				AAS	METAMORPHIC	UNKNOWN	UNKNOWN	GNEISS
ABY971		USGS		Geochemistry of rock samples from the National Geochemical Database: U.S. Geological Survey, Reston, VA.	U.S. Geological Survey	USGS		34.8528	-81.7778	0.01				ES	METAMORPHIC	UNKNOWN	UNKNOWN	GNEISS
ABY971		USGS		Geochemistry of rock samples from the National Geochemical Database: U.S. Geological Survey, Reston, VA.	U.S. Geological Survey	USGS		34.8528	-81.7778	0.01				AAS	METAMORPHIC	UNKNOWN	UNKNOWN	GNEISS
ABY974		USGS		Geochemistry of rock samples from the National Geochemical Database: U.S. Geological Survey, Reston, VA.	U.S. Geological Survey	USGS		34.8528	-81.7778	0.01				ES	METAMORPHIC	UNKNOWN	UNKNOWN	GNEISS																			30
ABY974		USGS		Geochemistry of rock samples from the National Geochemical Database: U.S. Geological Survey, Reston, VA.	U.S. Geological Survey	USGS		34.8528	-81.7778	0.01				AAS	METAMORPHIC	UNKNOWN	UNKNOWN	GNEISS
ABY975		USGS		Geochemistry of rock samples from the National Geochemical Database: U.S. Geological Survey, Reston, VA.	U.S. Geological Survey	USGS		34.8528	-81.7778	0.01				ES	METAMORPHIC	UNKNOWN	UNKNOWN	GNEISS
ABY975		USGS		Geochemistry of rock samples from the National Geochemical Database: U.S. Geological Survey, Reston, VA.	U.S. Geological Survey	USGS		34.8528	-81.7778	0.01				AAS	METAMORPHIC	UNKNOWN	UNKNOWN	GNEISS
ABY977		USGS		Geochemistry of rock samples from the National Geochemical Database: U.S. Geological Survey, Reston, VA.	U.S. Geological Survey	USGS		34.8528	-81.7778	0.01				ES	METAMORPHIC	UNKNOWN	UNKNOWN	GNEISS																			50
ABY977		USGS		Geochemistry of rock samples from the National Geochemical Database: U.S. Geological Survey, Reston, VA.	U.S. Geological Survey	USGS		34.8528	-81.7778	0.01				AAS	METAMORPHIC	UNKNOWN	UNKNOWN	GNEISS
ABY978		USGS		Geochemistry of rock samples from the National Geochemical Database: U.S. Geological Survey, Reston, VA.	U.S. Geological Survey	USGS		34.8528	-81.7778	0.01				ES	METAMORPHIC	UNKNOWN	UNKNOWN	GNEISS
ABY978		USGS		Geochemistry of rock samples from the National Geochemical Database: U.S. Geological Survey, Reston, VA.	U.S. Geological Survey	USGS		34.8528	-81.7778	0.01				AAS	METAMORPHIC	UNKNOWN	UNKNOWN	GNEISS
ABY981		USGS		Geochemistry of rock samples from the National Geochemical Database: U.S. Geological Survey, Reston, VA.	U.S. Geological Survey	USGS		34.8603	-81.7833	0.01				ES	METAMORPHIC	UNKNOWN	UNKNOWN	GNEISS																			100
ABY981		USGS		Geochemistry of rock samples from the National Geochemical Database: U.S. Geological Survey, Reston, VA.	U.S. Geological Survey	USGS		34.8603	-81.7833	0.01				AAS	METAMORPHIC	UNKNOWN	UNKNOWN	GNEISS
ABY983		USGS		Geochemistry of rock samples from the National Geochemical Database: U.S. Geological Survey, Reston, VA.	U.S. Geological Survey	USGS		34.8603	-81.7833	0.01				ES	METAMORPHIC	UNKNOWN	UNKNOWN	GNEISS																			150
ABY983		USGS		Geochemistry of rock samples from the National Geochemical Database: U.S. Geological Survey, Reston, VA.	U.S. Geological Survey	USGS		34.8603	-81.7833	0.01				AAS	METAMORPHIC	UNKNOWN	UNKNOWN	GNEISS
ACF401		USGS		Geochemistry of rock samples from the National Geochemical Database: U.S. Geological Survey, Reston, VA.	U.S. Geological Survey	USGS		58.5265	-134.348	0.01				ES	METAMORPHIC	UNKNOWN	UNKNOWN	GNEISS																			70
ACF401		USGS		Geochemistry of rock samples from the National Geochemical Database: U.S. Geological Survey, Reston, VA.	U.S. Geological Survey	USGS		58.5265	-134.348	0.01				COL	METAMORPHIC	UNKNOWN	UNKNOWN	GNEISS
ACF401		USGS		Geochemistry of rock samples from the National Geochemical Database: U.S. Geological Survey, Reston, VA.	U.S. Geological Survey	USGS		58.5265	-134.348	0.01				AAS	METAMORPHIC	UNKNOWN	UNKNOWN	GNEISS
ACF455		USGS		Geochemistry of rock samples from the National Geochemical Database: U.S. Geological Survey, Reston, VA.	U.S. Geological Survey	USGS		58.6691	-134.035	0.01				ES	METAMORPHIC	UNKNOWN	UNKNOWN	GNEISS																			50
ACF455		USGS		Geochemistry of rock samples from the National Geochemical Database: U.S. Geological Survey, Reston, VA.	U.S. Geological Survey	USGS		58.6691	-134.035	0.01				COL	METAMORPHIC	UNKNOWN	UNKNOWN	GNEISS
ACF455		USGS		Geochemistry of rock samples from the National Geochemical Database: U.S. Geological Survey, Reston, VA.	U.S. Geological Survey	USGS		58.6691	-134.035	0.01				AAS	METAMORPHIC	UNKNOWN	UNKNOWN	GNEISS
ACF469		USGS		Geochemistry of rock samples from the National Geochemical Database: U.S. Geological Survey, Reston, VA.	U.S. Geological Survey	USGS		58.628	-134.362	0.01				ES	METAMORPHIC	UNKNOWN	UNKNOWN	GNEISS																			30
ACF469		USGS		Geochemistry of rock samples from the National Geochemical Database: U.S. Geological Survey, Reston, VA.	U.S. Geological Survey	USGS		58.628	-134.362	0.01				AAS	METAMORPHIC	UNKNOWN	UNKNOWN	GNEISS
ACF473		USGS		Geochemistry of rock samples from the National Geochemical Database: U.S. Geological Survey, Reston, VA.	U.S. Geological Survey	USGS		58.2228	-134.139	0.01				ES	METAMORPHIC	UNKNOWN	UNKNOWN	GNEISS																			50
ACF473		USGS		Geochemistry of rock samples from the National Geochemical Database: U.S. Geological Survey, Reston, VA.	U.S. Geological Survey	USGS		58.2228	-134.139	0.01				AAS	METAMORPHIC	UNKNOWN	UNKNOWN	GNEISS
ACI379		USGS		Geochemistry of rock samples from the National Geochemical Database: U.S. Geological Survey, Reston, VA.	U.S. Geological Survey	USGS		55.0919	-130.947	0.01				ICPAES	METAMORPHIC	UNKNOWN	UNKNOWN	GNEISS
ACI379		USGS		Geochemistry of rock samples from the National Geochemical Database: U.S. Geological Survey, Reston, VA.	U.S. Geological Survey	USGS		55.0919	-130.947	0.01				ES	METAMORPHIC	UNKNOWN	UNKNOWN	GNEISS
ACI381		USGS		Geochemistry of rock samples from the National Geochemical Database: U.S. Geological Survey, Reston, VA.	U.S. Geological Survey	USGS		55.0758	-130.805	0.01				ICPAES	METAMORPHIC	UNKNOWN	UNKNOWN	GNEISS
ACI381		USGS		Geochemistry of rock samples from the National Geochemical Database: U.S. Geological Survey, Reston, VA.	U.S. Geological Survey	USGS		55.0758	-130.805	0.01				ES	METAMORPHIC	UNKNOWN	UNKNOWN	GNEISS
ACI382		USGS		Geochemistry of rock samples from the National Geochemical Database: U.S. Geological Survey, Reston, VA.	U.S. Geological Survey	USGS		55.118	-130.829	0.01				ICPAES	METAMORPHIC	UNKNOWN	UNKNOWN	GNEISS
ACI382		USGS		Geochemistry of rock samples from the National Geochemical Database: U.S. Geological Survey, Reston, VA.	U.S. Geological Survey	USGS		55.118	-130.829	0.01				ES	METAMORPHIC	UNKNOWN	UNKNOWN	GNEISS																			30
ACI387		USGS		Geochemistry of rock samples from the National Geochemical Database: U.S. Geological Survey, Reston, VA.	U.S. Geological Survey	USGS		55.0264	-130.694	0.01				ICPAES	METAMORPHIC	UNKNOWN	UNKNOWN	GNEISS
ACI387		USGS		Geochemistry of rock samples from the National Geochemical Database: U.S. Geological Survey, Reston, VA.	U.S. Geological Survey	USGS		55.0264	-130.694	0.01				ES	METAMORPHIC	UNKNOWN	UNKNOWN	GNEISS
ACI757		USGS		Geochemistry of rock samples from the National Geochemical Database: U.S. Geological Survey, Reston, VA.	U.S. Geological Survey	USGS		55.0714	-130.72	0.01				ICPAES	METAMORPHIC	UNKNOWN	UNKNOWN	GNEISS
ACI757		USGS		Geochemistry of rock samples from the National Geochemical Database: U.S. Geological Survey, Reston, VA.	U.S. Geological Survey	USGS		55.0714	-130.72	0.01				ES	METAMORPHIC	UNKNOWN	UNKNOWN	GNEISS																			50
ACI767		USGS		Geochemistry of rock samples from the National Geochemical Database: U.S. Geological Survey, Reston, VA.	U.S. Geological Survey	USGS		55.115	-130.742	0.01				ICPAES	METAMORPHIC	UNKNOWN	UNKNOWN	GNEISS
ACI767		USGS		Geochemistry of rock samples from the National Geochemical Database: U.S. Geological Survey, Reston, VA.	U.S. Geological Survey	USGS		55.115	-130.742	0.01				ES	METAMORPHIC	UNKNOWN	UNKNOWN	GNEISS
ACI769		USGS		Geochemistry of rock samples from the National Geochemical Database: U.S. Geological Survey, Reston, VA.	U.S. Geological Survey	USGS		55.1306	-130.733	0.01				ICPAES	METAMORPHIC	UNKNOWN	UNKNOWN	GNEISS
ACI769		USGS		Geochemistry of rock samples from the National Geochemical Database: U.S. Geological Survey, Reston, VA.	U.S. Geological Survey	USGS		55.1306	-130.733	0.01				ES	METAMORPHIC	UNKNOWN	UNKNOWN	GNEISS																			20
ACI772		USGS		Geochemistry of rock samples from the National Geochemical Database: U.S. Geological Survey, Reston, VA.	U.S. Geological Survey	USGS		55.1264	-130.703	0.01				ICPAES	METAMORPHIC	UNKNOWN	UNKNOWN	GNEISS
ACI772		USGS		Geochemistry of rock samples from the National Geochemical Database: U.S. Geological Survey, Reston, VA.	U.S. Geological Survey	USGS		55.1264	-130.703	0.01				ES	METAMORPHIC	UNKNOWN	UNKNOWN	GNEISS																			20
ACI773		USGS		Geochemistry of rock samples from the National Geochemical Database: U.S. Geological Survey, Reston, VA.	U.S. Geological Survey	USGS		55.1478	-130.712	0.01				ICPAES	METAMORPHIC	UNKNOWN	UNKNOWN	GNEISS
ACI773		USGS		Geochemistry of rock samples from the National Geochemical Database: U.S. Geological Survey, Reston, VA.	U.S. Geological Survey	USGS		55.1478	-130.712	0.01				ES	METAMORPHIC	UNKNOWN	UNKNOWN	GNEISS
ACI775		USGS		Geochemistry of rock samples from the National Geochemical Database: U.S. Geological Survey, Reston, VA.	U.S. Geological Survey	USGS		55.0742	-130.709	0.01				ICPAES	METAMORPHIC	UNKNOWN	UNKNOWN	GNEISS
ACI775		USGS		Geochemistry of rock samples from the National Geochemical Database: U.S. Geological Survey, Reston, VA.	U.S. Geological Survey	USGS		55.0742	-130.709	0.01				ES	METAMORPHIC	UNKNOWN	UNKNOWN	GNEISS																			20
ACI777		USGS		Geochemistry of rock samples from the National Geochemical Database: U.S. Geological Survey, Reston, VA.	U.S. Geological Survey	USGS		55.075	-130.776	0.01				ICPAES	METAMORPHIC	UNKNOWN	UNKNOWN	GNEISS
ACI777		USGS		Geochemistry of rock samples from the National Geochemical Database: U.S. Geological Survey, Reston, VA.	U.S. Geological Survey	USGS		55.075	-130.776	0.01				ES	METAMORPHIC	UNKNOWN	UNKNOWN	GNEISS
ACI785		USGS		Geochemistry of rock samples from the National Geochemical Database: U.S. Geological Survey, Reston, VA.	U.S. Geological Survey	USGS		55.1089	-130.714	0.01				ICPAES	METAMORPHIC	UNKNOWN	UNKNOWN	GNEISS
ACI785		USGS		Geochemistry of rock samples from the National Geochemical Database: U.S. Geological Survey, Reston, VA.	U.S. Geological Survey	USGS		55.1089	-130.714	0.01				ES	METAMORPHIC	UNKNOWN	UNKNOWN	GNEISS																			50
ACK096		USGS		Geochemistry of rock samples from the National Geochemical Database: U.S. Geological Survey, Reston, VA.	U.S. Geological Survey	USGS		62.7144	-143.435	0.01				ES	METAMORPHIC	UNKNOWN	UNKNOWN	GNEISS
477609		GEOROC	10.1016/j.chemgeo.2013.07.001	MESOARCHAEAN ALUMINOUS ROCKS AT STORO, SOUTHERN WEST GREENLAND: NEW AGE DATA AND EVIDENCE OF PREMETAMORPHIC SEAFLOOR WEATHERING OF BASALTS	CHEM. GEOL.	SZILAS, K.; GARDE, A. A.		64.4037	-51.0938	0.01				XRF	METAMORPHIC	UNKNOWN	UNKNOWN	GNEISS	69.687	0.697	13.948	0.93		4.08		2.648	1.404	2.1	2.326	0.063	0.048
477609		GEOROC	10.1016/j.chemgeo.2013.07.001	MESOARCHAEAN ALUMINOUS ROCKS AT STORO, SOUTHERN WEST GREENLAND: NEW AGE DATA AND EVIDENCE OF PREMETAMORPHIC SEAFLOOR WEATHERING OF BASALTS	CHEM. GEOL.	SZILAS, K.; GARDE, A. A.		64.4037	-51.0938	0.01				IGN	METAMORPHIC	UNKNOWN	UNKNOWN	GNEISS														1.374
477609		GEOROC	10.1016/j.chemgeo.2013.07.001	MESOARCHAEAN ALUMINOUS ROCKS AT STORO, SOUTHERN WEST GREENLAND: NEW AGE DATA AND EVIDENCE OF PREMETAMORPHIC SEAFLOOR WEATHERING OF BASALTS	CHEM. GEOL.	SZILAS, K.; GARDE, A. A.		64.4037	-51.0938	0.01				ICPMS	METAMORPHIC	UNKNOWN	UNKNOWN	GNEISS																			16.3288		33.4231	3.89889	14.9802	3.10716	0.816455	2.59076	0.434662	2.76307	0.574043	1.57884	0.245656
R73559		GEOROC	10.1016/0024-4937(96)00011-4	GEOCHEMISTRY AND AGE OF METAMORPHOSED FELSIC IGNEOUS ROCKS WITH A-TYPE AFFINITIES IN THE WILLYAMA SUPERGROUP, OLARY BLOCK, SOUTH AUSTRALIA, AND IMPLICATIONS FOR MINERAL EXPLORATION	LITHOS	ASHLEY, P. M.; COOK, N. D. J.; FANNING, C. M.		-32.0945	140.387	0.01				NOT GIVEN	METAMORPHIC	UNKNOWN	UNKNOWN	GNEISS	76.55	0.22	11.63		2.5			0.09	0.06	2.46	6.07	0.03	0.01						6		18		16
R73559		GEOROC	10.1016/0024-4937(96)00011-4	GEOCHEMISTRY AND AGE OF METAMORPHOSED FELSIC IGNEOUS ROCKS WITH A-TYPE AFFINITIES IN THE WILLYAMA SUPERGROUP, OLARY BLOCK, SOUTH AUSTRALIA, AND IMPLICATIONS FOR MINERAL EXPLORATION	LITHOS	ASHLEY, P. M.; COOK, N. D. J.; FANNING, C. M.		-32.0945	140.387	0.01				IGN	METAMORPHIC	UNKNOWN	UNKNOWN	GNEISS														0.25
AEY688		USGS		Geochemistry of rock samples from the National Geochemical Database: U.S. Geological Survey, Reston, VA.	U.S. Geological Survey	USGS		39.7272	-76.1422	0.01				ES	METAMORPHIC	UNKNOWN	UNKNOWN	GNEISS
AEY688		USGS		Geochemistry of rock samples from the National Geochemical Database: U.S. Geological Survey, Reston, VA.	U.S. Geological Survey	USGS		39.7272	-76.1422	0.01				AAS	METAMORPHIC	UNKNOWN	UNKNOWN	GNEISS
AGB351		USGS		Geochemistry of rock samples from the National Geochemical Database: U.S. Geological Survey, Reston, VA.	U.S. Geological Survey	USGS		58.5614	-134.54	0.01				ES	METAMORPHIC	UNKNOWN	UNKNOWN	GNEISS
AGB352		USGS		Geochemistry of rock samples from the National Geochemical Database: U.S. Geological Survey, Reston, VA.	U.S. Geological Survey	USGS		58.5614	-134.54	0.01				ES	METAMORPHIC	UNKNOWN	UNKNOWN	GNEISS																			150
AGB366		USGS		Geochemistry of rock samples from the National Geochemical Database: U.S. Geological Survey, Reston, VA.	U.S. Geological Survey	USGS		58.5586	-134.514	0.01				ES	METAMORPHIC	UNKNOWN	UNKNOWN	GNEISS
AGH114		USGS		Geochemistry of rock samples from the National Geochemical Database: U.S. Geological Survey, Reston, VA.	U.S. Geological Survey	USGS		64.2555	-142.692	0.01				ES	METAMORPHIC	UNKNOWN	UNKNOWN	GNEISS
AGH117		USGS		Geochemistry of rock samples from the National Geochemical Database: U.S. Geological Survey, Reston, VA.	U.S. Geological Survey	USGS		64.2542	-142.669	0.01				ES	METAMORPHIC	UNKNOWN	UNKNOWN	GNEISS																			20
AGH753		USGS		Geochemistry of rock samples from the National Geochemical Database: U.S. Geological Survey, Reston, VA.	U.S. Geological Survey	USGS		64.4375	-141.375	0.01				ES	METAMORPHIC	UNKNOWN	UNKNOWN	GNEISS
AGH756		USGS		Geochemistry of rock samples from the National Geochemical Database: U.S. Geological Survey, Reston, VA.	U.S. Geological Survey	USGS		64.4375	-141.375	0.01				ES	METAMORPHIC	UNKNOWN	UNKNOWN	GNEISS
AGH757		USGS		Geochemistry of rock samples from the National Geochemical Database: U.S. Geological Survey, Reston, VA.	U.S. Geological Survey	USGS		64.4375	-141.375	0.01				ES	METAMORPHIC	UNKNOWN	UNKNOWN	GNEISS
AGH760		USGS		Geochemistry of rock samples from the National Geochemical Database: U.S. Geological Survey, Reston, VA.	U.S. Geological Survey	USGS		64.3097	-141.408	0.01				ES	METAMORPHIC	UNKNOWN	UNKNOWN	GNEISS																			30
AGH761		USGS		Geochemistry of rock samples from the National Geochemical Database: U.S. Geological Survey, Reston, VA.	U.S. Geological Survey	USGS		64.3097	-141.408	0.01				ES	METAMORPHIC	UNKNOWN	UNKNOWN	GNEISS
AGH793		USGS		Geochemistry of rock samples from the National Geochemical Database: U.S. Geological Survey, Reston, VA.	U.S. Geological Survey	USGS		64.8739	-141.679	0.01				ES	METAMORPHIC	UNKNOWN	UNKNOWN	GNEISS
AHL349		USGS		Geochemistry of rock samples from the National Geochemical Database: U.S. Geological Survey, Reston, VA.	U.S. Geological Survey	USGS		39	-76	0.01				ES	METAMORPHIC	UNKNOWN	UNKNOWN	GNEISS																			70
AHL349		USGS		Geochemistry of rock samples from the National Geochemical Database: U.S. Geological Survey, Reston, VA.	U.S. Geological Survey	USGS		39	-76	0.01				AAS	METAMORPHIC	UNKNOWN	UNKNOWN	GNEISS
[truncated: 23,047 more rows]
[truncated: 75 more columns]

## Sheet: References
References
[truncated: 252 more rows]
