# Supplementary material for: Basic chemical composition combination rules and quantitative criterion of red beds
Source: Copernicus journal article supplement (doi:10.5194/se-15-1185-2024), 2024-09-20
Supplement: Supplementary file 1 [file se-15-1185-2024-supplement.zip]

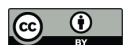

## *Supplement of*

# **Basic chemical composition combination rules and quantitative criterion of red beds**

**Guangjun Cui et al.**

*Correspondence to:* Cuiying Zhou (zhoucy@mail.sysu.edu.cn) and Zhen Liu (liuzh8@mail.sysu.edu.cn)

- se-15-1185-2024-supplement-title-page.pdf
- TS5-Updated version of Supplement
  - Table 1 in the Supplement-Mineral compositions of the red beds.xlsx
  - Table 10 in the Supplement-Chemical compositions of the blackshale.xlsx
  - Table 11 in the Supplement-Chemical compositions of the breccia.xlsx
  - Table 12 in the Supplement-Chemical compositions of the claystone.xlsx
  - Table 13 in the Supplement-Chemical compositions of the dolomite.xlsx
  - Table 14 in the Supplement-Chemical compositions of the lignite.xlsx
  - Table 15 in the Supplement-Chemical compositions of the limestone.xlsx
  - Table 16 in the Supplement-Chemical compositions of the marl.xlsx
  - Table 17 in the Supplement-Chemical compositions of the mudstone.xlsx
  - Table 18 in the Supplement-Chemical compositions of the siliciclastic.xlsx
  - Table 19 in the Supplement-Chemical compositions of the tuff.xlsx
  - Table 2 in the Supplement-Chemical compositions of the red beds.xlsx
  - Table 3 in the Supplement-Chemical compositions of the andesite\_part1.csv
  - Table 3 in the Supplement-Chemical compositions of the andesite\_part2.csv
  - Table 3 in the Supplement-Chemical compositions of the andesite\_part3.csv
  - Table 3 in the Supplement-Chemical compositions of the andesite\_part4.csv
  - Table 3 in the Supplement-Chemical compositions of the andesite\_part5.csv
  - Table 4 in the Supplement-Chemical compositions of the basalt\_part1.csv
  - Table 4 in the Supplement-Chemical compositions of the basalt\_part2.csv
  - Table 4 in the Supplement-Chemical compositions of the basalt\_part3.csv
  - Table 4 in the Supplement-Chemical compositions of the basalt\_part4.csv
  - Table 4 in the Supplement-Chemical compositions of the basalt\_part5.csv
  - Table 4 in the Supplement-Chemical compositions of the basalt\_part6.csv

- Table 4 in the Supplement-Chemical compositions of the basalt\_part7.csv
- Table 4 in the Supplement-Chemical compositions of the basalt\_part8.csv
- Table 5 in the Supplement-Chemical compositions of the diorite.csv
- Table 6 in the Supplement-Chemical compositions of the granite\_part1.csv
- Table 6 in the Supplement-Chemical compositions of the granite\_part2.csv
- Table 7 in the Supplement-Chemical compositions of the gneiss.xlsx
- Table 8 in the Supplement-Chemical compositions of the marble.xlsx
- Table 9 in the Supplement-Chemical compositions of the arkose.xlsx

The copyright of individual parts of the supplement might differ from the article licence.
